# Supplementary material for: Mutational Mtc6p attenuates autophagy and improves secretory expression of heterologous proteins in Kluyveromyces marxianus
Source: Microb Cell Fact. 2018 Sep 14;17:144. doi: 10.1186/s12934-018-0993-9 (PMC6138896; doi:10.1186/s12934-018-0993-9)
Supplement: Supplementary file 2 — Additional file 2. Detail information of the transcriptional analysis. [file 12934_2018_993_MOESM2_ESM.xlsx]

## Sheet: Sheet1
					Relative transcriptional pattern of genes in T1 to FIM1
					4h		6h		12h		24h		48h		72h
Gene_num in FIM1	Contigs	position in FIM1	Homologues in DMKU3-1042	Gene_name	log2FoldChange	P-value	log2FoldChange	P-value	log2FoldChange	P-value	log2FoldChange	P-value	log2FoldChange	P-value	log2FoldChange	P-value
Kmarxianus_Y179_1	1	complement(915..2102)	KLMA_70011	YJL171C	-0.808973	0.610155	-1.09733	0.150397	-0.94302	0.248629	0.286382	1	-2.34958	0.0400942	-0.376743	0.936814
Kmarxianus_Y179_2	1	3715..4830	KLMA_70012	_	-1.18113	0.300128	1.04809	0.462316	-1.07371	0.647409	0.749492	1	-2.21164	0.0620068	-0.543345	0.698813
Kmarxianus_Y179_3	1	7167..8330	KLMA_70463	_	1.4148	0.000479293	0.922264	0.000447337	0.670797	0.00354979	0.848232	0.0294846	0.600639	0.0513368	0.638561	0.290716
Kmarxianus_Y179_4	1	<13227..13784	KLMA_70462	FCY2	0.784922	0.0229472	0.820543	0.000448516	-0.214249	0.449907	-0.0699728	0.883692	-0.36587	0.34624	-1.57494	0.00756518
Kmarxianus_Y179_5	1	complement(14373..16895)	KLMA_70461	FLO9	0.0983322	0.708564	0.436183	0.0591644	0.2526	0.248675	-0.996296	0.00635502	-0.309917	0.305023	-1.5946	0.00969675
Kmarxianus_Y179_6	1	complement(17575..18597)	KLMA_10835	FLO5	0.74191	0.051192	0.20854	0.461076	-0.140934	0.489517	-0.68153	0.0531583	0.162061	0.500332	-0.0422607	0.950547
Kmarxianus_Y179_7	1	21349..21939	_	_	0.271844	0.544169	0.55262	0.061538	-0.228509	0.427046	-0.073203	0.932099	0.377125	0.332576	0.283885	0.684854
Kmarxianus_Y179_8	1	22981..24429	KLMA_10834	PHO12	-0.421637	0.30485	-0.0618347	0.78752	-0.533874	0.0124029	-0.843642	0.0136496	-0.485295	0.127491	-0.968882	0.0967875
Kmarxianus_Y179_9	1	complement(24689..25795)	KLMA_10833	_	0.261481	0.549342	0.245156	0.425961	-0.0919191	0.575926	0.985051	0.00307703	0.754889	0.00728872	0.337939	0.565653
Kmarxianus_Y179_10	1	complement(26523..27470)	KLMA_10832	URA1	-0.479666	0.306709	-0.177078	0.526141	0.644164	0.00331011	-0.293782	0.436548	-0.547537	0.111499	-1.16062	0.0626039
Kmarxianus_Y179_11	1	complement(28266..29909)	KLMA_10831	YCT1	-0.011164	0.985318	-0.0857084	0.740139	-0.206693	0.335317	-0.582502	0.080688	-0.717593	0.0170653	-0.567942	0.329502
Kmarxianus_Y179_12	1	32022..32693	KLMA_10830	Nqo2	-0.520197	0.263256	0.305011	0.328127	-0.316926	0.175697	-0.777903	0.111251	-1.08539	0.00794793	-2.40746	0.00943929
Kmarxianus_Y179_13	1	complement(33306..34265)	KLMA_10829	CWP1	-1.80342	1.42718e-05	-0.377288	0.150642	-0.435456	0.103148	-1.39806	0.00488124	-0.948866	0.0481632	-0.000750295	0.956707
Kmarxianus_Y179_14	1	complement(34745..35356)	_	_	-0.36927	0.99009	-0.240514	0.657353	-0.0654286	0.84349	0.651062	0.337999	0.75021	0.123585	1.30439	0.0510037
Kmarxianus_Y179_15	1	35586..36146	KLMA_10828	CWP1	-1.26075	0.000189846	0.676848	0.00353592	-0.495691	0.0392514	-0.733852	0.130725	-0.598318	0.169161	-0.0367747	0.925026
Kmarxianus_Y179_16	1	complement(36373..38142)	KLMA_10827	_	0.195932	0.523116	0.0160062	0.919066	-1.02648	2.71988e-05	-1.1232	0.0155505	-0.806389	0.0412813	0.0113969	1
Kmarxianus_Y179_17	1	39163..39825	KLMA_10826	CWP1	-0.421078	0.187878	0.840918	0.000167958	-0.560039	0.0298922	-0.676769	0.175408	-0.622062	0.144453	-0.326466	0.632108
Kmarxianus_Y179_18	1	complement(40329..42233)	KLMA_10824	str3	-0.576274	0.149543	-0.379542	0.0563139	-0.547581	0.00809115	-0.674243	0.0651024	-0.886197	0.00306592	-1.43333	0.0146784
Kmarxianus_Y179_19	1	complement(<43179..45324)	KLMA_10822	YPL109C	0.154192	0.628657	-0.107656	0.577791	-0.0375157	0.801771	0.0273791	0.973965	0.0208454	0.838056	1.12644	0.0450123
Kmarxianus_Y179_20	1	complement(45931..46482)	KLMA_10821	ARL1	-0.23783	0.526648	0.224926	0.364268	-0.167862	0.430443	0.0616123	0.846093	0.0505092	0.781211	0.0799597	0.882074
Kmarxianus_Y179_21	1	47058..47801	KLMA_10820	UBS1	0.124643	0.669762	0.151807	0.490657	0.188986	0.471901	0.0960288	0.816547	0.14871	0.556346	-0.25784	0.688555
Kmarxianus_Y179_22	1	complement(48164..49492)	KLMA_10819	TYR1	0.167783	0.628474	0.0915022	0.698363	-0.0682633	0.706243	0.336409	0.311488	0.0997891	0.623319	0.320162	0.531323
Kmarxianus_Y179_23	1	50028..50660	KLMA_10818	DAL3	0.00272244	0.780146	0.402425	0.231046	-0.470236	0.0404803	0.0184337	0.95788	-0.490489	0.127225	-0.134797	0.880241
Kmarxianus_Y179_24	1	50868..51464	KLMA_10817	YPL108W	0.135595	0.803569	0.0436911	0.799856	0.62946	0.105207	0.181615	0.701993	-0.303113	0.362912	-0.702967	0.221702
Kmarxianus_Y179_25	1	complement(51470..51880)	KLMA_10816	POP7	-0.412122	0.254619	-0.301098	0.287915	0.223532	0.548086	0.438547	0.245596	0.413366	0.177686	0.613567	0.297046
Kmarxianus_Y179_26	1	52119..53270	KLMA_10815	PEX32	-0.165099	0.679894	-0.309448	0.29744	-0.205518	0.340816	0.560775	0.0915692	1.09631	0.000208304	1.13535	0.0441264
Kmarxianus_Y179_27	1	53586..54311	KLMA_10814	YPL107W	0.23228	0.614696	0.780157	0.00031199	-0.189716	0.360121	0.181362	0.556997	0.420546	0.128204	-0.0262007	1
Kmarxianus_Y179_28	1	complement(54532..56616)	KLMA_10813	SSE1	0.49817	0.232354	0.48926	0.0835417	0.404889	0.119448	0.822885	0.0931162	0.969551	0.0117277	0.430797	0.647595
Kmarxianus_Y179_29	1	complement(56965..58755)	KLMA_10812	NPL4	0.237012	0.499051	0.0576778	0.884283	-0.0270027	0.854641	0.230644	0.510626	-0.259554	0.465639	-0.147343	0.816624
Kmarxianus_Y179_30	1	59110..59718	KLMA_10811	SEC66	-0.692716	0.0598529	-0.0539165	0.792815	0.108552	0.693501	0.617494	0.0679878	0.149629	0.515798	0.215525	0.731017
Kmarxianus_Y179_31	1	complement(59856..62099)	KLMA_10810	SYH1	0.208855	0.524895	-0.101415	0.667228	0.239256	0.272249	0.763349	0.0272179	0.571165	0.0342603	1.43989	0.0156056
Kmarxianus_Y179_32	1	complement(62507..62947)	KLMA_10809	UMP1	-0.377414	0.297457	0.0705212	0.793202	-0.341294	0.0966569	-0.0957862	0.82187	-0.320351	0.331894	-0.423604	0.500226
Kmarxianus_Y179_33	1	63430..64371	KLMA_10808	SWD3	-0.526156	0.0970064	0.271793	0.260785	-0.0931477	0.671291	0.411318	0.327318	0.105883	0.654097	0.363942	0.54105
Kmarxianus_Y179_34	1	64400..66592	KLMA_10807	MSD1	0.218173	0.491153	0.177476	0.446129	-0.136173	0.491987	-0.771125	0.035487	-0.242703	0.482214	-0.980916	0.110446
Kmarxianus_Y179_35	1	complement(66702..67235)	KLMA_10806	_	0.280871	0.446648	0.821909	0.0491182	0.0843133	0.735845	-0.82093	0.0454508	-0.494218	0.154938	-1.54828	0.0135463
Kmarxianus_Y179_36	1	complement(67818..68909)	KLMA_10805	IMO32	1.11385	0.00239623	2.77658	3.41912e-28	-0.098078	0.523238	0.390332	0.268209	-0.20398	0.499268	0.404839	0.533762
Kmarxianus_Y179_37	1	70202..71143	KLMA_10804	ECM31	-0.830411	0.0144084	1.05927	1.90191e-05	0.126813	0.753317	-0.1276	0.729458	-0.178702	0.67453	-0.192786	0.746515
Kmarxianus_Y179_38	1	complement(71174..72520)	KLMA_10803	FMP30	0.341033	0.42805	0.0391791	0.976697	0.287479	0.43562	1.23175	0.00967317	0.65235	0.0964513	1.47529	0.0241738
Kmarxianus_Y179_39	1	72988..74406	KLMA_10802	ELP4	0.206943	0.429256	-0.499969	0.0244906	0.571979	0.0942629	0.107488	0.793734	-0.482616	0.14274	-0.529885	0.407062
Kmarxianus_Y179_40	1	74790..75974	KLMA_10800	ATG21	-0.45367	0.230043	-0.0685518	0.694314	-0.11422	0.536853	-0.040848	0.919144	0.31945	0.21003	1.10051	0.0525623
Kmarxianus_Y179_41	1	complement(76061..76549)	KLMA_10799	AIM43	-0.620183	0.064271	0.10521	0.674701	0.117655	0.70525	0.167474	0.680419	-0.0584579	0.936893	-0.0204538	0.960261
Kmarxianus_Y179_42	1	complement(76777..77139)	KLMA_10798	MGR2	-0.936255	0.00179943	0.574114	0.0153609	-0.0443218	0.748976	-0.432607	0.216344	-0.238517	0.508607	-2.06591	0.000590751
Kmarxianus_Y179_43	1	77423..78847	KLMA_10797	MSY1	-0.22354	0.551615	0.190379	0.442936	-0.111211	0.548337	-0.855102	0.0256726	-0.130169	0.773855	-0.0622483	0.94553
Kmarxianus_Y179_44	1	complement(78916..79131)	_	_	-0.958713	0.00545603	-0.11361	0.615547	0.323311	0.448091	0.855962	0.071324	-0.268162	0.623646	0.141253	0.760925
Kmarxianus_Y179_45	1	79478..80542	KLMA_10796	PNG1	-0.356716	0.302299	-0.00596733	0.892233	-0.328395	0.16411	-0.296989	0.353891	-0.228585	0.504596	0.166577	0.730495
Kmarxianus_Y179_46	1	complement(80672..82018)	KLMA_10795	EHT1	-0.439346	0.300591	0.0149054	0.98954	-0.184302	0.369656	-0.217542	0.541964	-0.0127664	0.924403	0.72663	0.180383
Kmarxianus_Y179_47	1	complement(82396..84888)	KLMA_10794	FZO1	0.708815	0.087075	0.173074	0.466562	0.0367837	0.940847	-0.803591	0.0225117	0.110177	0.583647	-0.884997	0.152989
Kmarxianus_Y179_48	1	complement(85383..86123)	KLMA_10793	SEC62	-0.315141	0.384068	0.0138248	0.94772	0.0530502	0.871441	0.273754	0.449126	0.0888172	0.677553	0.940193	0.100435
Kmarxianus_Y179_49	1	86736..88667	KLMA_10791	NOG1	0.405909	0.212487	-0.447104	0.0568525	0.877779	7.21681e-05	0.65869	0.056819	-0.173854	0.619308	-0.679842	0.219012
Kmarxianus_Y179_50	1	89549..91300	KLMA_10789	DTR1	0.28823	0.36159	-0.501172	0.0213172	-0.879952	9.62356e-05	-0.232613	0.511943	-0.0323336	0.987174	0.377362	0.590053
Kmarxianus_Y179_51	1	91875..93227	KLMA_10788	SSU1	-0.0232765	1	-0.302156	0.178406	-0.123421	0.458901	-0.527251	0.111335	-0.554295	0.0696955	-1.07528	0.0583477
Kmarxianus_Y179_52	1	93583..>94644	KLMA_10787	GLR1	-0.351495	0.441877	-0.345381	0.142408	-0.0815987	0.648939	-0.859447	0.0214247	-0.652989	0.0324475	0.0518978	0.908461
Kmarxianus_Y179_53	1	complement(join(94633..94644,94958..96130))	KLMA_10786	RPS6	-0.436835	0.397183	0.271469	0.313267	0.470042	0.0697511	0.228715	0.604181	-0.479854	0.240629	-1.35719	0.103198
Kmarxianus_Y179_54	1	complement(<97860..99704)	KLMA_10784	SMP1	0.95536	0.0238894	-0.0393265	0.807166	0.0677437	0.727683	-0.487867	0.232767	-0.390035	0.260831	-1.44952	0.0440822
Kmarxianus_Y179_55	1	101535..102377	KLMA_10783	SOU1	-1.08751	0.0029093	-0.575706	0.0313575	-0.238764	0.265262	-0.821046	0.0361369	-0.748755	0.0197731	-2.58237	0.000407881
Kmarxianus_Y179_56	1	103476..104429	KLMA_10782	YDC1	-0.544768	0.157269	-0.311048	0.374463	-1.28154	1.48362e-09	-0.934139	0.0258138	-0.930342	0.0151036	-2.82089	0.00160146
Kmarxianus_Y179_57	1	104885..106045	KLMA_10781	GLY1	0.311099	0.370839	0.413041	0.0920406	-0.528039	0.0224658	-0.160774	0.660666	-0.60716	0.0449455	0.17802	0.786325
Kmarxianus_Y179_58	1	complement(106150..107835)	KLMA_10780	ELP3	0.105991	0.714749	-0.0867138	0.615858	0.500793	0.0585878	0.0017926	1	-0.20856	0.54922	-0.300739	0.591849
Kmarxianus_Y179_59	1	109490..116374	KLMA_10779	SEC16	0.90219	0.0854294	-0.091475	0.679089	0.217501	0.360132	-0.16996	0.722513	0.0337026	0.814633	0.429383	0.497323
Kmarxianus_Y179_60	1	complement(116532..117350)	KLMA_10778	MBA1	-0.16949	0.641747	0.190528	0.3828	0.0627969	0.826593	-0.663071	0.0631253	-0.028978	0.972464	0.49493	0.374798
Kmarxianus_Y179_61	1	117772..120207	KLMA_10777	BRO1	0.177164	0.584296	0.153509	0.534465	-0.264335	0.175374	-0.205341	0.557688	-0.162535	0.644142	0.360314	0.484638
Kmarxianus_Y179_62	1	complement(120247..121575)	KLMA_10776	SEN54	0.327075	0.309192	0.0049413	0.984801	0.244447	0.444353	0.663841	0.129855	0.485488	0.15389	1.08962	0.071231
Kmarxianus_Y179_63	1	join(124240..124494,124571..124714)	KLMA_10775	PCH2	-0.585878	0.255742	-0.46177	0.285541	-0.609403	0.089973	-0.831864	0.107443	-0.0662715	1	0.227038	0.790143
Kmarxianus_Y179_64	1	125202..126041	KLMA_10774	GDT1	-0.602805	0.0955044	-0.252901	0.201889	-0.214875	0.276566	-0.2645	0.442991	-0.684269	0.0265485	-0.352622	0.562588
Kmarxianus_Y179_65	1	complement(126149..126457)	KLMA_10773	_	-0.537861	0.166027	-0.418573	0.0793485	-0.190197	0.540804	-0.173962	0.677891	-0.370101	0.403669	-0.168238	0.866623
Kmarxianus_Y179_66	1	complement(126739..132525)	KLMA_10772	MOT1	0.384201	0.246817	-0.346448	0.0710531	0.465827	0.03405	0.217893	0.531446	0.256727	0.362379	0.233919	0.839313
Kmarxianus_Y179_67	1	133982..135163	KLMA_10771	LYS21	-0.0772855	0.90532	-1.08732	3.47431e-06	-0.329813	0.133752	-0.471579	0.178017	-0.453651	0.171138	-1.02595	0.0754723
Kmarxianus_Y179_68	1	join(135654..135660,136224..136786)	KLMA_60062	IMP3	-0.0490966	0.961737	0.307671	0.291533	0.979177	2.18187e-05	1.45296	0.000156058	0.253413	0.406388	-1.21837	0.0584375
Kmarxianus_Y179_69	1	join(137703..137713,138134..138605)	KLMA_10769	RPL21A	-0.54108	0.295639	0.396496	0.175717	0.482249	0.0588496	0.656762	0.127922	-0.21741	0.615245	-1.10569	0.118145
Kmarxianus_Y179_70	1	139193..140299	KLMA_10768	RIM2	0.231735	0.425389	-0.502427	0.0167897	0.294641	0.301857	-0.195275	0.660975	-0.130315	0.784484	-0.585504	0.248006
Kmarxianus_Y179_71	1	complement(140408..141052)	KLMA_10767	MED8	-0.410134	0.202269	-0.0127544	0.950417	-0.0076293	0.904196	-0.423578	0.272327	-0.154496	0.698994	-0.254226	0.682169
Kmarxianus_Y179_72	1	join(141311..141317,141391..141731)	KLMA_10766	AIM4	-0.534374	0.0793671	-0.0432881	0.882792	-0.102539	0.633594	0.293317	0.500563	0.107351	0.675582	-0.314524	0.625432
Kmarxianus_Y179_73	1	complement(142048..>142755)	KLMA_10765	ATP4	-0.00347258	0.957947	0.672121	0.0210571	-0.482409	0.038471	-0.810021	0.104321	-0.27819	0.536805	-1.3227	0.10361
Kmarxianus_Y179_74	1	complement(143499..144791)	KLMA_10764	MSI1	-0.168036	0.735351	0.0697623	0.809012	0.269987	0.351626	1.41478	0.0012111	1.35528	0.000257412	2.14132	0.000318726
Kmarxianus_Y179_75	1	complement(145163..146830)	KLMA_10763	RAG2	-0.407487	0.522997	-0.267084	0.26593	0.295376	0.28068	-0.226785	0.649644	-0.547757	0.173522	0.22541	0.681344
Kmarxianus_Y179_76	1	complement(147793..148206)	_	YBR197C	-0.152745	0.755249	0.291755	0.259551	-0.0897034	0.782703	-0.75866	0.111017	-0.430432	0.323422	-1.86412	0.0049973
Kmarxianus_Y179_77	1	148509..149327	KLMA_10762	GPI2	0.0194453	0.882379	0.282798	0.225927	0.00529724	1	0.218857	0.555606	0.0315441	0.840178	-0.131077	0.831191
Kmarxianus_Y179_78	1	complement(149447..151882)	KLMA_10761	TAF5	0.265136	0.448325	0.115581	0.696077	0.150089	0.509538	0.620465	0.0653125	0.691822	0.0125246	1.37919	0.0190051
Kmarxianus_Y179_79	1	153851..156304	KLMA_10758	GCR1	0.101685	0.765685	0.817463	0.00224712	-0.16642	0.455141	0.282453	0.374504	0.113552	0.597012	-0.197018	0.679622
Kmarxianus_Y179_80	1	156711..158681	KLMA_10757	YTA6	0.472154	0.268188	0.864383	0.0176391	-0.720507	0.00526095	-1.61378	4.84271e-06	-0.767913	0.0157773	-1.14604	0.0519611
Kmarxianus_Y179_81	1	159197..161596	KLMA_10756	UBP16	0.12548	0.686759	0.199808	0.395831	-0.220135	0.256436	-1.32274	0.00160105	-0.261298	0.474389	-1.13786	0.080828
Kmarxianus_Y179_82	1	join(161842..161850,162052..163857)	KLMA_10755	BEM1	0.135355	0.629613	-0.14571	0.487652	0.449337	0.0318931	1.09353	0.00151942	1.47815	2.71077e-07	1.74537	0.00508797
Kmarxianus_Y179_83	1	complement(164016..164573)	KLMA_10754	YPL071C	-0.224386	0.492293	-0.218719	0.432389	0.442954	0.0565135	0.350352	0.332483	0.849523	0.00354587	-0.0359345	0.964127
Kmarxianus_Y179_84	1	164913..166556	KLMA_10753	MUK1	-0.26457	0.520502	-0.324661	0.121271	0.1805	0.392696	0.363052	0.271614	0.2957	0.251443	0.708956	0.188557
Kmarxianus_Y179_85	1	complement(166601..167536)	KLMA_10752	BTS1	-0.400612	0.231896	-0.0770056	0.751606	-0.329969	0.171686	-0.358186	0.283683	-0.491852	0.155269	-0.500606	0.417594
Kmarxianus_Y179_86	1	168026..168595	KLMA_10751	DER1	-0.217696	0.585112	-0.21362	0.388821	-0.10106	0.631451	0.269767	0.427289	-0.0124753	0.925731	-0.607321	0.305688
Kmarxianus_Y179_87	1	complement(168710..169585)	KLMA_10750	_	0.701538	0.0495117	-0.219126	0.388416	0.417749	0.129094	1.59151	4.66254e-05	1.11372	0.00058967	0.387274	0.51085
Kmarxianus_Y179_88	1	complement(169960..170571)	KLMA_10749	YPL067C	-0.020654	0.952	-0.257434	0.22132	-0.131992	0.496097	0.376023	0.28056	-0.795872	0.0126601	-2.00962	0.00296085
Kmarxianus_Y179_89	1	complement(171241..171444)	_	_	-0.132783	0.685736	-0.00509529	0.983212	0.358504	0.095386	-0.978633	0.00781749	-0.503071	0.13419	-0.818879	0.162345
Kmarxianus_Y179_90	1	173322..175787	KLMA_10748	MCM7	0.186737	0.571493	-0.286144	0.186241	0.127364	0.583513	0.815381	0.0173613	0.967388	0.00100022	1.15044	0.0458919
Kmarxianus_Y179_91	1	complement(176056..177123)	KLMA_10747	AAH1	0.137684	0.79534	0.0404449	0.902047	0.309855	0.26449	2.9564	1.56136e-09	0.550383	0.150702	0.545956	0.39978
Kmarxianus_Y179_92	1	join(177851..178296,178452..178485)	KLMA_10746	RGL1	0.239236	0.466576	-0.0859102	0.666533	0.119511	0.754811	0.470836	0.340728	0.43906	0.258166	0.79765	0.203305
Kmarxianus_Y179_93	1	178703..179158	KLMA_10746	RGL1	0.311037	0.407834	0.189664	0.477201	-0.0386301	0.878485	0.752204	0.140401	0.801102	0.0408626	0.993744	0.0994938
Kmarxianus_Y179_94	1	179381..180133	KLMA_10745	VPS28	-0.491105	0.197668	-0.0178722	0.907429	-0.485129	0.0710156	-0.583902	0.109187	-0.58372	0.0779436	-0.113753	0.886519
Kmarxianus_Y179_95	1	180527..181984	KLMA_10744	TIM50	0.0626473	0.810079	-0.0536803	0.78784	0.0161646	0.95224	-0.644239	0.148529	-0.259027	0.531659	-0.0252232	0.99595
Kmarxianus_Y179_96	1	182548..184614	KLMA_10743	COS111	-0.0141165	0.993529	-0.514046	0.0171568	-0.447115	0.0424523	-1.14296	0.00411063	-1.46752	7.05007e-05	-1.43396	0.0565386
Kmarxianus_Y179_97	1	187053..188576	KLMA_10742	ALD6	0.380491	0.293356	0.28171	0.264888	-0.389716	0.0821492	-1.60167	0.00239312	-0.708252	0.113334	-2.83162	0.00988213
Kmarxianus_Y179_98	1	complement(188846..189838)	KLMA_10741	LDH1	-0.393008	0.269245	-0.487201	0.100947	-0.374865	0.209013	-0.421196	0.347778	0.0491239	0.815137	-0.0035303	1
Kmarxianus_Y179_99	1	190155..191225	KLMA_10740	SAY1	-0.640412	0.105176	-0.85048	0.000109165	-0.0111533	0.912629	0.738275	0.157557	0.606463	0.120137	0.18561	0.869247
Kmarxianus_Y179_100	1	191487..192776	KLMA_10739	KTR3	-0.403258	0.372419	-0.0182848	0.865042	0.231352	0.31451	0.550899	0.108353	0.177722	0.463838	1.1752	0.0341582
Kmarxianus_Y179_101	1	193650..196247	KLMA_10738	YHR131C	0.429384	0.251679	0.166448	0.487482	-0.11587	0.542399	0.332099	0.33805	0.221023	0.414704	0.286966	0.658945
Kmarxianus_Y179_102	1	complement(196481..196777)	_	_	-0.463738	0.144244	0.264432	0.408478	-0.184596	0.616508	-0.334242	0.499372	0.00567981	0.90661	-0.080416	0.972182
Kmarxianus_Y179_103	1	197133..198968	KLMA_10737	_	-0.00253425	0.917373	0.108172	0.665961	-0.114475	0.51306	-0.52099	0.142318	-0.379204	0.241508	-0.370652	0.537363
Kmarxianus_Y179_104	1	199114..200304	KLMA_10736	ro-4	-0.0925203	0.759118	0.198481	0.434732	-0.224954	0.362909	-0.143709	0.798876	-0.294076	0.47691	0.309654	0.629007
Kmarxianus_Y179_105	1	complement(200568..201221)	KLMA_10735	FUR1	0.612166	0.109911	1.18066	5.8929e-08	1.85078	4.28115e-09	1.57179	0.000251685	0.589373	0.0802958	-0.332249	0.527483
Kmarxianus_Y179_106	1	complement(201877..>202158)	KLMA_10734	LSM7	-0.393635	0.208127	0.00897306	0.992023	-0.236101	0.259328	0.0835429	0.812702	-0.0403306	0.994788	-0.622129	0.303697
Kmarxianus_Y179_107	1	202582..203334	KLMA_10733	ALF1	-0.374903	0.215485	0.319876	0.179766	-0.0219258	0.88829	0.0222194	0.963418	-0.103088	0.846243	0.0779192	0.891184
Kmarxianus_Y179_108	1	complement(204294..204557)	KLMA_10732	TIM9	-0.75956	0.0206794	0.339772	0.122768	0.186854	0.511858	-0.414985	0.238057	-0.298164	0.38498	-1.40811	0.0182472
Kmarxianus_Y179_109	1	complement(204969..205772)	KLMA_10731	URA3	0.184016	0.786563	-0.632119	0.0178548	-0.0481549	0.82477	-0.52674	0.307315	-0.63515	0.177975	-2.38704	0.025446
Kmarxianus_Y179_110	1	206296..207615	KLMA_10730	_	-0.344758	0.394877	0.0267912	0.956281	0.185347	0.464634	-0.14653	0.690392	0.11352	0.588702	-0.265141	0.624571
Kmarxianus_Y179_111	1	complement(207735..211883)	KLMA_10729	GEA2	0.481911	0.230276	0.117969	0.678329	0.0935509	0.747717	0.27378	0.42494	0.628492	0.0244865	0.851879	0.161661
Kmarxianus_Y179_112	1	212266..213435	KLMA_10728	CPR7	0.0414077	0.849207	-0.0122034	0.910154	0.296574	0.398922	0.796115	0.0953161	0.449624	0.219139	0.305122	0.638614
Kmarxianus_Y179_113	1	complement(213462..217592)	KLMA_10727	RAV1	0.396502	0.274572	0.0867209	0.749226	-0.201863	0.301051	-0.0534106	0.887345	0.301752	0.240845	0.7472	0.15741
Kmarxianus_Y179_114	1	217915..218241	KLMA_10726	PET191	-0.282583	0.211941	0.144168	0.456456	-0.439905	0.0468719	-0.84011	0.0245077	-0.454628	0.155183	-2.12325	0.000708718
Kmarxianus_Y179_115	1	219380..222493	KLMA_10725	RAD26	0.115486	0.714452	0.0624911	0.855533	-0.6573	0.00274785	-0.900312	0.0130921	-0.404975	0.20438	-1.2126	0.0452804
Kmarxianus_Y179_116	1	222800..224818	KLMA_10724	YEL023C	-0.23261	0.602709	-0.234947	0.600387	-0.376201	0.10293	0.315378	0.4019	0.186499	0.461581	-0.0455399	0.911541
Kmarxianus_Y179_117	1	complement(225657..226298)	KLMA_10723	RIP1	-0.30462	0.475797	1.0553	0.00011748	-0.193468	0.355764	-0.739275	0.127856	0.0907719	0.716912	-1.55817	0.0593121
Kmarxianus_Y179_118	1	complement(227101..229554)	KLMA_10722	HUL4	0.720265	0.0823037	0.708478	0.030491	-0.845127	5.36879e-05	-0.413276	0.238268	-0.203296	0.544548	-0.78297	0.166747
Kmarxianus_Y179_119	1	complement(230091..230471)	KLMA_10721	SNU13	-0.458967	0.1964	0.104844	0.728514	1.23893	4.89862e-07	0.95314	0.00565341	-0.107523	0.787136	-1.2219	0.0320432
Kmarxianus_Y179_120	1	231058..233340	KLMA_10720	GEF1	0.291495	0.357647	-0.178969	0.357276	0.338148	0.17302	1.80482	1.2451e-05	1.34304	0.000261175	1.54945	0.00785515
Kmarxianus_Y179_121	1	complement(233380..236814)	KLMA_10719	URB2	0.452414	0.177432	-0.561354	0.00628736	0.46987	0.111913	0.0792738	0.861404	-0.109722	0.852096	-0.321208	0.405704
Kmarxianus_Y179_122	1	237436..239601	KLMA_10718	NUP85	0.017681	0.883381	-0.0748679	0.677949	0.243974	0.266573	0.394201	0.249347	0.499057	0.0665502	1.51996	0.00741936
Kmarxianus_Y179_123	1	complement(239989..240471)	KLMA_10717	VMA3	-0.815579	0.0446861	-0.313631	0.188579	0.188277	0.476721	0.130715	0.721227	-0.203662	0.62418	0.0422569	0.864795
Kmarxianus_Y179_124	1	complement(241602..242810)	KLMA_10716	POL32	0.356076	0.284028	-0.130056	0.501693	0.0297675	0.93171	-0.102269	0.797595	0.239631	0.407084	-0.00488669	0.967378
Kmarxianus_Y179_125	1	complement(243175..244053)	KLMA_10715	SOU2	-0.572692	0.134515	-0.286313	0.191806	-0.520261	0.033305	-1.16166	0.011564	-1.35886	0.000514037	-3.10281	0.00085069
Kmarxianus_Y179_126	1	245480..246433	KLMA_10714	BUD16	-0.263715	0.484202	0.0928295	0.687665	0.132164	0.550653	1.28027	0.000217679	1.10842	0.000243698	1.54874	0.00626478
Kmarxianus_Y179_127	1	complement(247032..247460)	KLMA_10713	VPS55	-1.08258	0.00215603	-0.0318293	0.828412	-0.299709	0.127065	0.0120002	0.97955	0.147102	0.538894	0.344708	0.487695
Kmarxianus_Y179_128	1	complement(248213..250138)	KLMA_10712	SSC1	0.489031	0.19989	0.593692	0.0323313	0.421561	0.094524	-0.23792	0.670031	0.321416	0.374804	-0.535153	0.594368
Kmarxianus_Y179_129	1	250938..252665	KLMA_10711	TAH11	0.207297	0.445185	0.249315	0.259929	0.405957	0.162817	1.00693	0.0183232	0.526718	0.0914653	0.927134	0.110932
Kmarxianus_Y179_130	1	complement(252828..256448)	KLMA_10710	SPF1	0.152831	0.709298	-0.179062	0.474026	0.38071	0.121492	0.757479	0.047498	0.734594	0.0180498	1.58704	0.0195337
Kmarxianus_Y179_131	1	complement(256889..259717)	KLMA_10709	MCM3	0.40102	0.264761	-0.0672149	0.732957	0.226474	0.322698	0.36451	0.269764	0.125607	0.550069	0.860347	0.135973
Kmarxianus_Y179_132	1	complement(261096..261569)	KLMA_10708	HYP2	-0.197138	0.688131	0.652784	0.0264952	0.433871	0.0899524	-0.070559	0.894239	-0.61194	0.123591	-1.4825	0.0614758
Kmarxianus_Y179_133	1	263490..264842	KLMA_10707	ANP1	0.472109	0.20406	0.0581806	0.832996	0.243941	0.269386	0.65218	0.0482423	0.438472	0.126403	0.513348	0.348551
Kmarxianus_Y179_134	1	265481..266650	KLMA_10706	RAD23	-0.237411	0.646359	0.0929922	0.759121	0.01439	0.970016	-0.072983	0.855137	-0.0920561	0.850593	-0.423341	0.529029
Kmarxianus_Y179_135	1	complement(267099..267764)	KLMA_10705	UTR4	-0.730216	0.0429699	-0.10221	0.598735	-0.0678094	0.717387	-0.654387	0.0580713	-0.550925	0.07454	0.497447	0.340408
Kmarxianus_Y179_136	1	268792..270204	KLMA_10704	bioA	-0.853302	0.0291383	-0.572616	0.00978518	-0.108093	0.589913	0.0765268	0.790446	0.156879	0.537551	0.938057	0.0984638
Kmarxianus_Y179_137	1	271626..273074	KLMA_10703	SIP5	0.191879	0.574977	-0.1045	0.591156	-0.420634	0.0875565	-0.0934188	0.847059	-0.419727	0.267473	-0.766883	0.356926
Kmarxianus_Y179_138	1	273723..274046	KLMA_10702	RPP1A	-0.95783	0.0220713	0.309492	0.29229	0.390195	0.115529	0.518826	0.21326	-0.416027	0.261671	-1.88605	0.00466681
Kmarxianus_Y179_139	1	complement(<274573..>275115)	KLMA_10701	RPL13A	-0.557374	0.260584	0.358743	0.202609	0.440226	0.0862669	0.487978	0.270264	-0.387895	0.327654	-1.33918	0.0771374
Kmarxianus_Y179_140	1	join(276815..276838,277315..277722)	KLMA_10700	RPS16	-0.732261	0.137411	0.226998	0.443485	0.434348	0.0930746	0.726579	0.105234	-0.175434	0.701278	-0.993433	0.168297
Kmarxianus_Y179_141	1	278260..279393	KLMA_10699	YMR144W	-0.032247	0.989299	0.0536636	0.870893	-0.394439	0.0595744	0.606561	0.107207	0.140621	0.546718	0.845473	0.139834
Kmarxianus_Y179_142	1	complement(280054..281367)	KLMA_10698	SUB2	-0.246071	0.635673	0.0188731	0.990905	0.285222	0.253359	0.438896	0.275195	0.507947	0.101023	1.39575	0.0427408
Kmarxianus_Y179_143	1	complement(<281877..283361)	KLMA_10697	_	0.632063	0.0829578	-0.00723366	0.900734	0.282173	0.159286	-0.116509	0.896487	0.147015	0.524958	-0.152986	0.844134
Kmarxianus_Y179_144	1	complement(285283..286992)	KLMA_10696	GAL4	0.375624	0.266052	-0.0119847	0.918833	-0.028184	0.857004	0.133263	0.681491	-0.208225	0.582149	-0.703206	0.235701
Kmarxianus_Y179_145	1	complement(290384..292018)	KLMA_10695	NDE1	0.505835	0.257127	0.762823	0.00736145	0.114302	0.677881	0.39683	0.251425	-0.363415	0.27515	-0.333447	0.510183
Kmarxianus_Y179_146	1	complement(293721..294509)	KLMA_10694	CKB2	-0.416588	0.295801	-0.0624597	0.714413	0.014543	0.964157	0.227722	0.489908	-0.033568	0.994391	-0.0708783	0.901482
Kmarxianus_Y179_147	1	294978..297527	KLMA_10693	HIR2	0.0705225	0.774806	-0.257151	0.207113	0.0404152	0.866302	0.113276	0.723076	-0.166905	0.580522	-0.504345	0.419618
Kmarxianus_Y179_148	1	complement(297582..298721)	KLMA_10692	MSW1	-0.0369241	0.941416	0.302977	0.155916	0.221784	0.258157	-0.728792	0.047326	-0.048479	0.995467	0.536888	0.305875
Kmarxianus_Y179_149	1	complement(298959..300038)	KLMA_10691	CYC2	0.0276668	0.889763	0.361361	0.153548	0.116079	0.701013	-0.724424	0.0566054	-0.107144	0.870307	-0.289667	0.698352
Kmarxianus_Y179_150	1	300311..301315	KLMA_10690	CIA1	-0.0804019	0.864602	0.0422602	0.91154	-0.0503583	0.81641	0.411427	0.257703	0.610728	0.0590765	0.624201	0.267621
Kmarxianus_Y179_151	1	complement(301460..302314)	KLMA_10689	PEP12	-0.31615	0.334203	-0.225065	0.272832	-0.495911	0.0138618	-0.578611	0.0849887	-0.898142	0.00333491	-1.28259	0.0354481
Kmarxianus_Y179_152	1	complement(302604..>303476)	KLMA_10688	BIG1	-0.431409	0.199864	0.0966341	0.69456	0.0450419	0.885949	0.898537	0.0144858	0.58122	0.0594994	0.658437	0.220498
Kmarxianus_Y179_153	1	complement(304072..306180)	KLMA_10687	ATP22	0.291348	0.339443	0.00666582	0.996586	0.45871	0.11405	0.566842	0.158677	1.01989	0.00134958	1.09134	0.0605525
Kmarxianus_Y179_154	1	306791..310000	KLMA_10686	KIC1	0.590665	0.15541	0.040816	0.927765	0.137612	0.540412	-0.0622074	0.921389	0.0706781	0.754443	-0.220052	0.74954
Kmarxianus_Y179_155	1	311315..313957	KLMA_10685	SBE2	0.457522	0.284034	-0.128965	0.542969	0.165101	0.523673	0.247161	0.541506	-0.124452	0.777551	-0.427636	0.595649
Kmarxianus_Y179_156	1	314365..315270	KLMA_10684	YPQ2	-0.0495995	0.931176	0.403715	0.0945318	-0.166686	0.382655	-0.348616	0.373214	-0.222616	0.514911	-0.867322	0.142304
Kmarxianus_Y179_157	1	316117..317106	KLMA_10683	XYL1	-0.766457	0.0697515	-0.86073	0.0011119	-0.514789	0.0221267	-1.28926	0.00858124	-0.837903	0.0358604	-1.24058	0.166501
Kmarxianus_Y179_158	1	317596..318588	KLMA_10682	TRR1	0.23705	0.522465	0.304022	0.29082	0.228039	0.347337	-0.0427674	0.929526	-0.24097	0.51493	-0.144442	0.822265
Kmarxianus_Y179_159	1	complement(319028..320209)	KLMA_10681	CDC12	-0.13056	0.799104	-0.111227	0.617305	0.190326	0.386242	0.306537	0.386744	0.292734	0.282549	0.832517	0.151864
Kmarxianus_Y179_160	1	321062..322546	KLMA_10680	CDC3	-0.138125	0.777975	0.114045	0.701656	0.115949	0.651999	0.182352	0.643497	0.150548	0.543562	0.56566	0.34672
Kmarxianus_Y179_161	1	323057..326467	KLMA_10679	CCC2	1.20763	0.00141294	-0.0725508	0.670472	-0.0447295	0.78384	-0.314393	0.374656	-0.185367	0.609581	0.00941145	0.913729
Kmarxianus_Y179_162	1	327119..331849	KLMA_10678	BPT1	0.965443	0.00877643	0.603512	0.0156304	0.200047	0.455897	1.04676	0.00773364	0.983062	0.00229668	1.42965	0.0594062
Kmarxianus_Y179_163	1	complement(332305..333639)	KLMA_10677	MET17	-1.26146	0.00269661	-2.32424	8.42778e-22	0.0507179	0.813207	-0.175618	0.626491	-1.46401	2.00808e-06	-1.80191	0.00356188
Kmarxianus_Y179_164	1	341462..342679	KLMA_10676	YPR015C	0.224415	0.478334	0.156151	0.462128	0.100939	0.672329	0.709232	0.0342793	0.788361	0.00376456	0.559463	0.365413
Kmarxianus_Y179_165	1	complement(342938..343234)	KLMA_10675	COX19	-0.478763	0.136234	0.124132	0.688242	-0.226499	0.31251	-0.97401	0.00476313	-0.331922	0.330062	-1.46678	0.0138465
Kmarxianus_Y179_166	1	complement(343721..344398)	KLMA_10674	ENT4	-0.351296	0.264463	0.174481	0.461715	-0.243197	0.228937	-0.215786	0.501402	-0.436073	0.163484	-1.54853	0.0111377
Kmarxianus_Y179_167	1	346799..347296	KLMA_10673	GPX2	-0.373613	0.208054	0.328216	0.149434	-0.103142	0.661897	-0.430937	0.207373	-0.800279	0.00837436	-1.65383	0.00559806
Kmarxianus_Y179_168	1	complement(<347432..348880)	KLMA_10672	PRP19	-0.00877692	0.988877	0.102221	0.695578	0.284448	0.255616	0.548691	0.172164	0.741931	0.0216138	0.890723	0.131702
Kmarxianus_Y179_169	1	complement(349303..350883)	KLMA_10671	OCA5	-0.425583	0.322866	-0.189502	0.415763	0.162118	0.46781	0.089982	0.791043	0.337478	0.199832	0.578444	0.343147
Kmarxianus_Y179_170	1	complement(351297..352964)	KLMA_10670	DPS1	-0.0990465	0.856694	0.0674026	0.851729	0.247382	0.30228	-0.477936	0.272626	-0.316777	0.397307	-0.561138	0.374361
Kmarxianus_Y179_171	1	353471..353944	KLMA_10669	MRPL25	-0.149128	0.683839	0.134699	0.58832	0.0513736	0.870948	-0.771413	0.033505	0.0187023	0.824931	-1.41388	0.0162886
Kmarxianus_Y179_172	1	354222..354959	KLMA_10668	PRP38	-0.550291	0.114444	0.152072	0.481061	-0.0414927	0.804455	0.00113185	0.99319	0.0627477	0.725788	-0.307465	0.64842
Kmarxianus_Y179_173	1	complement(355027..355452)	KLMA_10667	SMD1	-0.216331	0.52283	0.156511	0.530133	-0.124672	0.649909	0.15813	0.759033	-0.255741	0.568278	-1.17338	0.0547617
Kmarxianus_Y179_174	1	356126..356683	KLMA_10666	_	-0.604949	0.0969408	-0.0930383	0.700681	-0.186458	0.603098	0.646783	0.17497	0.892965	0.0186096	1.93269	0.0030467
Kmarxianus_Y179_175	1	complement(356622..357008)	_	_	-0.702338	0.134586	0.22066	0.670757	0.385804	0.393813	0.667663	0.193983	0.710582	0.132715	1.78971	0.0140317
Kmarxianus_Y179_176	1	complement(357307..358536)	KLMA_10664	UPF3	0.300262	0.392873	0.0481725	0.827894	-0.0255629	0.88591	-0.107056	0.734639	-0.141818	0.726813	0.302099	0.530523
Kmarxianus_Y179_177	1	complement(358966..359424)	KLMA_10663	NDK1	-0.349357	0.184241	1.8157	3.85198e-12	-0.202307	0.249072	-0.668574	0.127839	-0.398426	0.283212	-1.24645	0.0482479
Kmarxianus_Y179_178	1	360125..361504	KLMA_10662	THP1	0.306603	0.359805	0.483503	0.0331554	0.292558	0.242398	0.708166	0.0565051	0.818422	0.0151745	1.23891	0.034321
Kmarxianus_Y179_179	1	362238..363167	KLMA_10661	SIT4	-0.391591	0.341935	-0.073537	0.686995	0.178026	0.482848	-0.225028	0.562932	-0.178632	0.618277	-0.724191	0.222311
Kmarxianus_Y179_180	1	363937..364878	KLMA_10660	SCO1	-0.468563	0.239568	0.0316801	0.929548	0.190579	0.384499	-0.870557	0.0246155	-0.460499	0.176157	-1.91257	0.00534373
Kmarxianus_Y179_181	1	complement(365100..366281)	KLMA_10659	engD	-0.439638	0.332236	-0.0258	0.878536	0.185728	0.470852	-0.347997	0.416452	-0.66722	0.0670673	-0.776828	0.214147
Kmarxianus_Y179_182	1	367249..369996	KLMA_10658	CHS2	0.201358	0.501957	-0.447245	0.0453376	-0.181726	0.321079	-0.210027	0.53264	0.553014	0.0349872	0.796564	0.144371
Kmarxianus_Y179_183	1	complement(370163..371530)	KLMA_10657	_	-0.146138	0.709445	-0.0808338	0.900336	-0.422082	0.209597	-0.539724	0.257666	-0.256166	0.530714	0.644088	0.295099
Kmarxianus_Y179_184	1	372586..376098	KLMA_10656	CHS3	0.678645	0.0975568	-0.0592583	0.728086	0.18359	0.433405	0.410255	0.235999	0.111983	0.634961	0.283197	0.606859
Kmarxianus_Y179_185	1	complement(376525..381231)	KLMA_10655	CDR4	0.678471	0.0893096	-0.397717	0.0511175	-0.361264	0.0854893	-1.19997	0.00387517	-0.672751	0.0730348	-2.09575	0.0106449
Kmarxianus_Y179_186	1	complement(384294..386168)	KLMA_10654	FUR4	-0.43359	0.310572	-0.233015	0.254613	0.154965	0.651777	0.115945	0.711509	0.138297	0.594637	0.450953	0.406133
Kmarxianus_Y179_187	1	complement(387023..391408)	KLMA_10653	SNQ2	0.520499	0.268183	0.473243	0.093013	-0.188392	0.303438	0.046073	0.914769	-0.62097	0.0629814	-0.440189	0.496513
Kmarxianus_Y179_188	1	complement(392472..>393077)	KLMA_20482	RLP7	-0.246154	0.680043	-0.0515232	0.812529	0.602998	0.00638418	0.313071	0.376268	-0.432601	0.217486	-1.48611	0.0303301
Kmarxianus_Y179_189	1	395443..396219	KLMA_10651	YPL199C	-0.44257	0.241045	-0.315943	0.115531	0.205438	0.531874	0.29917	0.450816	0.276167	0.354621	0.617602	0.300021
Kmarxianus_Y179_190	1	complement(396321..397199)	KLMA_10650	MPS2	-0.31973	0.516725	-0.888846	0.0120818	0.325252	0.476248	0.103629	0.859793	-0.518783	0.330197	0.942655	0.193258
Kmarxianus_Y179_191	1	complement(397588..399309)	KLMA_10649	DLD1	0.146958	0.626578	0.235696	0.331345	-0.00418344	0.958178	0.315327	0.324253	0.713256	0.0101572	1.01583	0.087941
Kmarxianus_Y179_192	1	400374..402401	KLMA_10648	HSF	0.682435	0.10201	0.185307	0.535942	0.151396	0.542244	-0.00342509	0.94318	-0.0400488	0.951666	-0.308453	0.756988
Kmarxianus_Y179_193	1	403155..404330	KLMA_10647	YIG1	-0.735399	0.093764	-0.225893	0.512079	-0.430743	0.143527	-0.822403	0.0941594	-0.294511	0.489127	-2.29785	0.0108086
Kmarxianus_Y179_194	1	405323..407632	KLMA_10646	AFT1	0.755097	0.054301	-0.157646	0.42527	0.096889	0.702907	-0.149038	0.718781	-0.0308573	0.979821	-0.527751	0.443219
Kmarxianus_Y179_195	1	complement(407815..408183)	KLMA_10645	RPB9	-0.618483	0.0671317	-0.0279594	0.88523	0.0988716	0.721054	0.392937	0.297724	0.542544	0.0716987	0.775929	0.175304
Kmarxianus_Y179_196	1	408626..409159	KLMA_10643	MNP1	-0.360247	0.27737	0.518312	0.0275693	0.0334342	0.882893	-0.867182	0.0303658	-0.35045	0.312599	-1.48801	0.0152205
Kmarxianus_Y179_197	1	complement(409435..410541)	KLMA_10642	TPK2	-0.478572	0.226349	0.0148458	0.99878	-0.351688	0.115665	-0.791012	0.0540864	-0.647703	0.0689691	-1.00987	0.137182
Kmarxianus_Y179_198	1	complement(411142..412617)	KLMA_10641	HRR25	0.221894	0.534655	-0.0680512	0.747901	0.0548917	0.861748	-0.00294637	0.962358	-0.20262	0.605939	-1.43064	0.0595498
Kmarxianus_Y179_199	1	413786..414964	KLMA_10640	NPY1	0.118337	0.694855	0.517355	0.0212624	-0.402323	0.0629366	-0.23545	0.521053	-0.383732	0.227523	-1.04431	0.0748693
Kmarxianus_Y179_200	1	complement(415562..419764)	KLMA_10639	YLR419W	0.662444	0.0700966	-0.0241594	0.842549	0.472732	0.0297651	0.797507	0.0215356	0.791376	0.00629181	1.38038	0.0186049
Kmarxianus_Y179_201	1	420250..421347	KLMA_10638	CDC73	-0.436046	0.24642	0.000338425	0.925398	0.0868946	0.781567	0.568939	0.121804	0.490438	0.0992768	0.884397	0.117134
Kmarxianus_Y179_202	1	421737..422306	KLMA_10637	_	0.863595	0.130792	0.493634	0.491431	0.0556028	0.840159	0.64159	0.140659	1.09559	0.00240287	0.479188	0.4539
Kmarxianus_Y179_203	1	422809..423336	KLMA_10636	CNB1	-0.11592	0.631314	0.416672	0.0491552	-0.347103	0.0930649	-0.778408	0.0449363	-0.738837	0.0271339	-1.18775	0.0591178
Kmarxianus_Y179_204	1	complement(423615..425270)	KLMA_10635	DAL5	-0.453629	0.255993	-0.0388065	0.863233	-0.0188555	0.891423	0.61411	0.0879888	0.500097	0.107434	0.620004	0.30225
Kmarxianus_Y179_205	1	complement(426309..428084)	KLMA_10634	DPH2	0.11246	0.61371	-0.659641	0.00219259	0.255647	0.424101	0.281656	0.405884	0.0855643	0.707041	0.761749	0.160723
Kmarxianus_Y179_206	1	428636..429721	KLMA_10633	URA4	-0.435951	0.263038	-0.0638423	0.731454	-0.0959148	0.658006	-0.629697	0.0829719	-0.398688	0.219038	0.0299256	0.945809
Kmarxianus_Y179_207	1	complement(429766..430086)	KLMA_10632	_	-0.106055	0.734878	-0.181132	0.442654	-0.325197	0.116893	0.740137	0.0406039	0.770644	0.00807177	1.04319	0.0687584
Kmarxianus_Y179_208	1	complement(430356..430883)	KLMA_10631	RPN13	-0.269478	0.489865	0.0896525	0.743722	-0.18467	0.408395	-0.105156	0.782036	-0.0401699	0.949745	0.173523	0.736337
Kmarxianus_Y179_209	1	431422..437304	KLMA_10630	DCK1	0.365574	0.426345	0.115931	0.668634	0.060072	0.853225	-0.159328	0.703949	0.325266	0.220568	1.13563	0.0634434
Kmarxianus_Y179_210	1	437564..437929	KLMA_10629	ACP1	-0.0282115	0.981196	0.674254	0.00652503	-0.169208	0.378541	-0.364275	0.362494	-0.323792	0.372401	-0.471957	0.446328
Kmarxianus_Y179_211	1	438288..439376	KLMA_10628	SDS22	-0.421139	0.229987	0.120499	0.602525	-0.0266474	0.874461	-0.166889	0.646105	-0.392326	0.241545	-0.756961	0.219865
Kmarxianus_Y179_212	1	439549..440916	KLMA_10627	YNL040W	-0.360646	0.330893	-0.108148	0.546279	-0.184994	0.361539	-0.746584	0.029906	-0.217888	0.541714	0.562582	0.302083
Kmarxianus_Y179_213	1	441229..442614	KLMA_10626	MST1	0.31856	0.361256	0.48746	0.0326624	-0.0417162	0.864083	-0.553702	0.100354	-0.00886662	0.903414	-0.375508	0.524307
Kmarxianus_Y179_214	1	complement(442669..443934)	KLMA_10625	ATG17	-0.354949	0.32856	0.180288	0.582966	-0.384109	0.148806	-0.886367	0.0138715	-0.465882	0.183856	-0.324081	0.623857
Kmarxianus_Y179_215	1	444171..446177	KLMA_10624	SPP382	0.0887698	0.771626	-0.0720048	0.736923	-0.127229	0.487228	-0.0271455	0.982123	0.0731297	0.699276	-0.0261154	0.990325
Kmarxianus_Y179_216	1	complement(446521..447684)	KLMA_10623	MIA40	-0.148641	0.760012	0.403662	0.105435	-0.104296	0.612406	-0.699392	0.102225	-0.0320582	0.991917	0.242379	0.66624
Kmarxianus_Y179_217	1	448089..448691	KLMA_10622	YKT6	-0.567837	0.124969	-0.209039	0.294683	-0.14408	0.464012	-0.675826	0.072384	-0.671128	0.0309926	-0.983768	0.104973
Kmarxianus_Y179_218	1	449817..451595	KLMA_10621	CYB2	-0.222217	0.586223	0.615089	0.0110787	-1.22617	3.77628e-09	-0.614696	0.141916	-0.0702356	0.901574	-1.03061	0.129503
Kmarxianus_Y179_219	1	452474..456367	KLMA_10620	TUS1	0.144001	0.622042	-0.0511838	0.752973	-0.0467956	0.777979	0.997713	0.00307789	1.22408	2.56731e-05	1.84036	0.00118791
Kmarxianus_Y179_220	1	456957..457955	KLMA_10619	TDA5	0.00277347	0.947417	0.388848	0.113448	0.486542	0.134302	1.37835	0.00671785	0.869659	0.0351119	1.26529	0.0434969
Kmarxianus_Y179_221	1	complement(458115..458624)	KLMA_10618	SPC2	-0.806145	0.0169522	0.00723847	0.999839	-0.0243112	0.853974	-0.214638	0.594102	-0.13111	0.823918	0.1998	0.711555
Kmarxianus_Y179_222	1	459340..461208	KLMA_10617	MAG2	0.0192318	0.914199	0.315316	0.151765	0.0753277	0.778455	0.283375	0.367714	0.160831	0.496685	0.222229	0.698637
Kmarxianus_Y179_223	1	<461695..463767	KLMA_10616	CRN1	0.583896	0.169602	-0.100352	0.64344	0.0125198	1	0.261055	0.4218	0.396524	0.153156	1.00256	0.0899745
Kmarxianus_Y179_224	1	complement(464029..464514)	KLMA_10615	rplM	-0.178707	0.494875	0.158642	0.505891	0.0808627	0.754985	-0.69467	0.0534013	-0.127579	0.762027	-0.628873	0.268504
Kmarxianus_Y179_225	1	complement(464759..465871)	KLMA_10614	MPD1	-0.342809	0.373992	0.140237	0.536062	0.222109	0.302154	1.07784	0.00163272	0.690227	0.0170646	-0.56289	0.363218
Kmarxianus_Y179_226	1	466125..466826	KLMA_10613	YOR289W	-0.928611	0.00519861	-0.0570295	0.74102	-0.39083	0.0998311	-0.878232	0.0224782	-0.927787	0.00457004	-2.0491	0.00148928
Kmarxianus_Y179_227	1	468279..469196	KLMA_10612	PRY2	0.381778	0.50227	-0.145773	0.458035	0.228503	0.289813	-0.820003	0.0359745	-0.0205947	0.927595	-0.0548719	0.940918
Kmarxianus_Y179_228	1	469908..470549	KLMA_10611	PRY3	-0.0818857	0.924782	0.358685	0.390992	0.171963	0.743682	0.670568	0.31009	0.347433	0.603569	-0.071942	0.942662
Kmarxianus_Y179_229	1	471244..474927	KLMA_10610	SCP160	0.282033	0.464509	0.159046	0.559467	0.417385	0.0776266	0.539423	0.145135	0.823293	0.00487594	1.85843	0.00457076
Kmarxianus_Y179_230	1	complement(475373..475996)	KLMA_10609	YPT52	-0.141314	0.793095	-0.0505055	0.804672	-0.323361	0.111715	0.09016	0.8578	-0.187614	0.620932	-0.870048	0.160654
Kmarxianus_Y179_231	1	complement(476636..477907)	KLMA_10608	_	0.847856	0.0416462	-0.493644	0.091181	0.00908831	0.982225	-0.31438	0.41566	-0.179669	0.663536	0.234658	0.565567
Kmarxianus_Y179_232	1	478794..479357	_	_	0.155252	0.988614	1.33991	0.239636	0.368341	0.997793	0.145368	1	-0.617416	0.573856	-1.4273	0.220261
Kmarxianus_Y179_233	1	480165..481757	KLMA_10607	FCJ1	0.673762	0.103805	0.215548	0.397099	-0.0312314	0.781746	-0.499401	0.209027	-0.0464328	0.986411	0.45253	0.421583
Kmarxianus_Y179_234	1	482215..483789	KLMA_10606	ARP4	-0.0742274	0.889345	0.0158456	0.980465	-0.0711547	0.650114	0.350842	0.343244	0.604702	0.0279501	1.11767	0.0484812
Kmarxianus_Y179_235	1	complement(483926..485428)	KLMA_10605	HEL1	0.0329797	0.940696	0.358242	0.0970434	-0.44594	0.0267493	-0.361157	0.304566	-0.197713	0.552735	-0.53447	0.3651
Kmarxianus_Y179_236	1	complement(485724..487904)	KLMA_10604	IML2	-0.0156032	0.955723	0.0970616	0.708641	-0.0101499	0.911724	0.384627	0.31528	0.191782	0.504874	1.01138	0.141302
Kmarxianus_Y179_237	1	complement(488339..490069)	KLMA_10603	IRS4	0.281833	0.41018	0.0148065	0.95986	0.390196	0.0570954	-0.219674	0.688377	0.118353	0.690631	-0.0546017	0.950166
Kmarxianus_Y179_238	1	490620..491108	KLMA_10602	VPS51	-0.170889	0.643854	0.181953	0.46536	-0.0246788	0.945387	-0.121474	0.786889	-0.327466	0.432528	-0.294291	0.644508
Kmarxianus_Y179_239	1	complement(491119..491928)	KLMA_10601	YDR090C	0.210702	0.548584	0.158467	0.72971	-0.538505	0.0502132	-0.8976	0.0608037	0.137711	0.778665	0.0323614	0.955173
Kmarxianus_Y179_240	1	492260..493837	KLMA_10600	YDR061W	0.0557326	0.84371	0.528633	0.0138171	-0.58798	0.00655021	-1.30398	0.00184535	-0.671479	0.042115	-0.532551	0.403649
Kmarxianus_Y179_241	1	494329..496017	KLMA_10599	LCB2	0.0739123	0.762325	0.10794	0.721301	-0.037835	0.792102	-0.0409887	0.918167	-0.113361	0.785829	0.382935	0.476873
Kmarxianus_Y179_242	1	complement(496312..497010)	KLMA_10598	RRT8	0.132254	0.863437	0.0557385	0.86942	0.181356	0.572518	1.35124	0.00362644	0.886154	0.0154597	1.46844	0.0145173
Kmarxianus_Y179_243	1	complement(497707..499521)	KLMA_10597	RLF2	-0.13461	0.796438	-0.158069	0.411022	0.123092	0.650752	0.413188	0.304233	0.277843	0.288788	0.846197	0.142175
Kmarxianus_Y179_244	1	complement(500418..501614)	KLMA_10596	hemocyanin	-0.502891	0.213865	-0.0214971	1	0.995406	0.128315	-1.17596	0.0311878	-1.12122	0.00895999	-1.51439	0.0203738
Kmarxianus_Y179_245	1	502159..502896	KLMA_10595	TIF6	-0.358287	0.404274	-0.0899254	0.576376	1.01528	0.000392658	0.20496	0.532745	-0.584943	0.0651003	-1.14632	0.0477844
Kmarxianus_Y179_246	1	503296..504972	KLMA_10594	SEC9	0.37175	0.294567	-0.132265	0.522833	-0.0280824	0.896147	-0.191131	0.644723	-0.193814	0.608514	-0.88171	0.163099
Kmarxianus_Y179_247	1	complement(505364..505822)	KLMA_10593	ECL1P	0.158092	0.639588	0.699108	0.00172124	0.816564	0.00020397	0.700772	0.0981607	0.315232	0.360251	0.400526	0.648412
Kmarxianus_Y179_248	1	508496..509710	KLMA_10592	KYE1	0.430716	0.33527	0.933925	5.1629e-05	0.0209866	0.993722	-0.294768	0.466866	-0.659371	0.0595919	-0.898867	0.212829
Kmarxianus_Y179_249	1	510137..510712	KLMA_10591	TMA23	0.348402	0.329288	-0.30385	0.216718	0.465486	0.183049	0.541177	0.187074	0.160429	0.695881	-0.523133	0.341889
Kmarxianus_Y179_250	1	510952..514359	KLMA_10590	MDM1	0.323523	0.340054	-0.355352	0.128786	0.0433419	0.931875	-0.0195195	0.891858	0.197247	0.461568	0.969582	0.075687
Kmarxianus_Y179_251	1	complement(514335..515609)	KLMA_10589	RRN9	0.0369663	0.815975	-0.397818	0.0875858	0.433411	0.14442	0.436397	0.292334	0.625152	0.0548446	1.11666	0.0511279
Kmarxianus_Y179_252	1	515858..516685	KLMA_10588	SEC65	-0.463322	0.234505	-0.0960657	0.606085	0.12745	0.564262	0.121438	0.691024	-0.220032	0.524169	-0.282459	0.669667
Kmarxianus_Y179_253	1	complement(516898..517575)	KLMA_10587	URA5	-0.553381	0.188028	-0.0548856	0.806969	0.0771471	0.758969	-0.554321	0.17469	-0.545893	0.112369	-0.677389	0.254888
Kmarxianus_Y179_254	1	518442..519416	KLMA_10586	_	-0.019406	0.986919	0.17637	0.454711	0.177056	0.517614	0.414933	0.250062	0.175257	0.499432	0.349439	0.496148
Kmarxianus_Y179_255	1	complement(519553..520713)	KLMA_10585	DSK2	-0.10252	0.873662	-0.0210694	0.850625	0.0286187	0.890074	0.440593	0.268298	0.656352	0.049584	0.79102	0.266352
Kmarxianus_Y179_256	1	521515..522531	KLMA_10584	_	0.0276464	0.775841	-0.595967	0.00331674	0.59465	0.00450195	0.708252	0.0371425	0.532167	0.0493725	0.15246	0.818327
Kmarxianus_Y179_257	1	522979..523950	KLMA_10583	CTK3	0.01413	0.895175	0.0858333	0.788528	0.273858	0.285093	0.77316	0.0302453	-0.0171135	0.978663	-0.229257	0.705846
Kmarxianus_Y179_258	1	524484..527240	KLMA_10582	BUL1	0.555368	0.138517	-0.228724	0.290637	0.0777823	0.759155	0.7135	0.0324293	0.708463	0.0107438	0.721922	0.21712
Kmarxianus_Y179_259	1	complement(527512..528435)	KLMA_10581	COQ5	-0.652492	0.0810825	-0.041135	0.787309	0.0902011	0.753535	-0.192387	0.592215	0.0875463	0.619539	0.300162	0.602421
Kmarxianus_Y179_260	1	529622..530596	KLMA_10580	RCE1	-0.340627	0.318676	0.0932172	0.771875	-0.3772	0.0918926	0.0124391	0.92167	-0.289446	0.424995	0.196219	0.726085
Kmarxianus_Y179_261	1	531295..534168	KLMA_10579	ZDS2	0.772701	0.063893	-0.102356	0.596389	0.171397	0.416992	0.476307	0.144567	0.614071	0.0247961	1.21876	0.0365417
Kmarxianus_Y179_262	1	534422..534742	KLMA_10578	YML108W	-0.191858	0.802563	0.0492609	0.931507	0.951808	0.0136143	0.781086	0.0737882	0.176726	0.545335	-0.451592	0.393168
Kmarxianus_Y179_263	1	535283..536428	KLMA_10577	SCS7	-0.831193	0.0956657	-1.07058	0.000175483	0.603034	0.00633393	0.217291	0.513463	-0.469864	0.181101	-1.20511	0.0708434
Kmarxianus_Y179_264	1	537075..538649	KLMA_10576	TAF8	0.422704	0.228098	0.465554	0.0322721	0.178692	0.479344	0.812801	0.0390805	0.738732	0.0155136	0.639747	0.252373
Kmarxianus_Y179_265	1	539016..541205	KLMA_10575	FCP1	0.375886	0.271663	0.0393301	0.901563	0.243437	0.283253	0.715933	0.0433357	0.62311	0.0292832	0.920146	0.0834007
Kmarxianus_Y179_266	1	complement(541375..542844)	KLMA_10574	EAF7	0.365791	0.318074	-0.107832	0.532241	0.0580508	0.782411	0.223264	0.44711	0.079429	0.697476	0.277615	0.602491
Kmarxianus_Y179_267	1	543232..544680	KLMA_10573	NAM9	0.0225262	0.892872	0.0235621	0.974749	0.234652	0.288439	-0.605574	0.143143	0.169005	0.505803	0.114304	0.898614
Kmarxianus_Y179_268	1	complement(544899..546500)	KLMA_10572	SRV2	-0.215805	0.66772	0.0375028	0.940307	0.0133948	1	-0.250199	0.539558	-0.18614	0.648046	0.639397	0.25852
Kmarxianus_Y179_269	1	546827..547405	KLMA_10571	_	-0.11672	0.806071	0.0605026	0.847911	0.336148	0.214848	0.423091	0.236969	0.493557	0.106476	1.05645	0.0612006
Kmarxianus_Y179_270	1	complement(<547556..>547783)	KLMA_10570	YSF3	-0.934282	0.0140547	-0.0285116	0.88397	-0.000230523	0.95409	0.659652	0.207878	0.816846	0.0643402	0.827421	0.217046
Kmarxianus_Y179_271	1	548111..552784	KLMA_10569	THO2	0.740754	0.100291	0.0817157	0.752738	0.140193	0.569227	0.167132	0.63155	0.416351	0.101405	1.18527	0.0441333
Kmarxianus_Y179_272	1	553108..554283	KLMA_10568	INN1	0.624547	0.110661	0.23613	0.301743	-0.241856	0.342193	0.321784	0.435356	0.484614	0.193606	1.04408	0.0651194
Kmarxianus_Y179_273	1	554562..555671	KLMA_10567	_	0.543669	0.143488	0.586107	0.022787	0.0915659	0.691564	0.501091	0.208275	-0.644658	0.0659535	-0.959205	0.225699
Kmarxianus_Y179_274	1	complement(555890..556639)	KLMA_10566	RPC31	0.134695	0.668971	0.158032	0.501682	0.523628	0.0442157	0.449602	0.190811	-0.0249731	0.979327	0.0753229	0.902958
Kmarxianus_Y179_275	1	complement(556906..557355)	KLMA_10565	PGA2	-0.376759	0.233212	0.0944084	0.739956	-0.299829	0.181314	0.198761	0.58216	0.0138522	0.903561	-0.42966	0.432733
Kmarxianus_Y179_276	1	complement(557620..558951)	KLMA_10564	SLM5	-0.0921698	0.843503	0.496103	0.0249319	-0.287629	0.16742	-0.956743	0.00866258	-0.173085	0.657503	-1.11866	0.0609409
Kmarxianus_Y179_277	1	complement(559146..559907)	KLMA_10563	MMS21	0.45548	0.184779	0.15986	0.546216	-0.150004	0.630601	-0.519054	0.246773	-0.2267	0.599371	-0.338951	0.58943
Kmarxianus_Y179_278	1	560165..561058	KLMA_10562	EAF5	-0.452625	0.211591	-0.0408955	0.785513	0.6368	0.0605934	0.551464	0.201699	0.749112	0.027973	0.894829	0.121944
Kmarxianus_Y179_279	1	complement(561728..561847)	KLMA_10561	PMP2	-1.0359	0.00297453	0.00873131	1	-0.292423	0.157822	-0.0690753	0.879716	-0.307538	0.417262	-1.41773	0.084248
Kmarxianus_Y179_280	1	562661..563224	_	_	0.559506	0.373435	0.866478	0.148457	0.407293	0.533693	-0.0379729	1	2.0831	0.031277	0.494621	0.58537
Kmarxianus_Y179_281	1	563574..564527	KLMA_10560	GTT3	0.664296	0.14934	-0.341518	0.091746	-0.0958142	0.620998	-0.583373	0.101881	-0.236666	0.524666	0.0626961	0.793705
Kmarxianus_Y179_282	1	565197..567122	KLMA_10559	NPP1	0.270159	0.438986	0.0951325	0.768169	-0.273698	0.216464	0.0455391	0.875337	-0.0312173	0.948306	-0.562164	0.339821
Kmarxianus_Y179_283	1	568020..568961	KLMA_10558	ARDH	-0.667316	0.0920318	-0.991206	2.6242e-06	-0.321183	0.137537	-0.603643	0.204688	-0.576593	0.14138	-4.08848	0.000107858
Kmarxianus_Y179_284	1	complement(569310..569882)	KLMA_10557	rhb1	-0.0707049	0.9305	-0.0189006	0.924035	-0.00257224	0.940149	0.183659	0.563667	0.00859883	0.987804	-0.940591	0.111584
Kmarxianus_Y179_285	1	570621..572123	KLMA_10556	EDC3	0.190618	0.559282	0.00764317	0.903102	0.318311	0.211418	0.537111	0.119711	0.685841	0.0166924	1.33026	0.0175783
Kmarxianus_Y179_286	1	572723..574465	KLMA_10553	VAC8	0.323925	0.416181	-0.0738019	0.750624	-0.120983	0.585096	-0.509665	0.242425	0.0167959	0.904488	-0.898182	0.218083
Kmarxianus_Y179_287	1	575932..576966	KLMA_10552	MAK32	-0.49033	0.221681	-0.285982	0.169515	-0.447794	0.0767925	0.0179559	0.922749	-0.336752	0.385052	0.26483	0.652054
Kmarxianus_Y179_288	1	complement(577018..577293)	KLMA_10551	MAK31	-0.827566	0.0414465	-0.195646	0.479664	-0.541971	0.101813	-0.066265	0.881002	-0.143481	0.827064	0.102458	0.788822
Kmarxianus_Y179_289	1	577665..577907	_	HTL1	_	_	_	_	_	_	_	_	_	_	_	_
Kmarxianus_Y179_290	1	577665..577907	_	HTL1	_	_	_	_	_	_	_	_	_	_	_	_
Kmarxianus_Y179_291	1	578634..579227	KLMA_10550	UBC8	-0.471559	0.226903	0.12149	0.665445	-0.5182	0.0293303	-0.386148	0.411006	-0.234022	0.559695	-0.438251	0.608189
Kmarxianus_Y179_292	1	579843..581996	KLMA_10549	GLC3	-0.435656	0.255813	-0.676284	0.00126815	-0.653563	0.00574049	-0.881769	0.0615915	-0.372569	0.342322	-0.448512	0.581502
Kmarxianus_Y179_293	1	582999..585938	KLMA_10548	CWH43	0.0651767	0.813278	-0.357764	0.137464	0.123257	0.602202	0.244305	0.448097	0.477513	0.0742252	0.833446	0.157495
Kmarxianus_Y179_294	1	complement(587136..588824)	KLMA_10547	HGT1	0.263046	0.534785	0.338457	0.406145	-0.0805714	0.714538	-0.273371	0.514959	-0.457279	0.314944	-3.00575	0.00203883
Kmarxianus_Y179_295	1	complement(<590985..592777)	KLMA_10546	HGT1	0.689044	0.193236	-0.0720326	0.826332	0.0946067	0.825629	-0.892021	0.0545985	-0.714699	0.0249507	-3.3604	3.98064e-08
Kmarxianus_Y179_296	1	complement(594417..596069)	KLMA_10547	HGT1	0.232045	0.653997	-0.449394	0.319477	-0.148822	0.623712	-0.258258	0.592507	-2.68114	3.19386e-18	-4.34977	2.89364e-10
Kmarxianus_Y179_297	1	complement(<597830..599649)	KLMA_10546	HGT1	-0.42226	0.438935	-0.359413	0.373919	-0.523929	0.168789	-0.931191	0.033304	-0.611568	0.0949633	-2.82296	2.01011e-06
Kmarxianus_Y179_298	1	complement(601344..603014)	KLMA_10545	HGT1	0.365743	0.588959	0.470765	0.545042	-0.374241	0.316752	-0.546308	0.396666	-1.13983	0.00394068	-3.10085	2.49677e-07
Kmarxianus_Y179_299	1	complement(604996..608103)	KLMA_10544	_	0.91305	0.0252994	-0.205729	0.354191	0.295947	0.205988	-0.0797052	0.937071	0.253983	0.333845	0.628009	0.261057
Kmarxianus_Y179_300	1	complement(608642..609463)	KLMA_10543	YCR016W	0.409212	0.1725	-0.65768	0.00603404	0.918137	0.00972617	0.717006	0.0988558	-0.0578491	0.886011	-1.3086	0.0256496
Kmarxianus_Y179_301	1	610276..610965	KLMA_10542	CTO1	0.519218	0.206303	-0.730181	0.0204704	0.0766591	0.856542	-0.359318	0.428218	0.0862303	0.743838	-0.0357079	0.974491
Kmarxianus_Y179_302	1	610959..612491	KLMA_10541	POL4	0.0542079	0.777712	-0.50482	0.0215456	-0.0778934	0.638513	-0.169576	0.635075	0.231769	0.348038	0.305387	0.570498
Kmarxianus_Y179_303	1	complement(612722..613972)	KLMA_10540	PGK	-0.809159	0.233739	-0.452656	0.012032	0.510414	0.0833658	-0.412118	0.445525	-0.727817	0.104872	-1.06882	0.270321
Kmarxianus_Y179_304	1	614856..616595	KLMA_10539	_	0.85782	0.0668116	0.229044	0.337556	-0.121964	0.513805	0.0929072	0.699964	-0.0654	0.891392	0.103421	0.806255
Kmarxianus_Y179_305	1	617022..617555	KLMA_10538	IGD1	-1.14204	0.00252787	-0.514959	0.0188113	-0.582321	0.00815567	-0.974	0.0185906	-0.910393	0.00891092	-1.35879	0.0371405
Kmarxianus_Y179_306	1	617871..619076	KLMA_10537	AIM17	-1.25749	0.00113036	-1.00144	1.96091e-06	-0.347363	0.0932602	-0.968984	0.00689097	-0.839484	0.00495118	-0.271568	0.693618
Kmarxianus_Y179_307	1	619534..621555	KLMA_10536	IFM1	0.514805	0.158782	0.471376	0.0313807	0.220218	0.419124	-1.11709	0.00181063	-0.325747	0.324478	-1.57816	0.0134901
Kmarxianus_Y179_308	1	complement(621623..622927)	KLMA_10535	TSR4	-0.0056465	0.931488	-0.113589	0.5349	0.471259	0.0796468	0.161479	0.661101	-0.33365	0.279496	-0.869949	0.108943
Kmarxianus_Y179_309	1	624002..626260	KLMA_10534	GCN20	0.220338	0.500691	0.172732	0.507363	0.489672	0.0231164	0.3324	0.330253	0.149558	0.528413	0.393837	0.506786
Kmarxianus_Y179_310	1	complement(626306..629338)	KLMA_10533	DIS3	0.34415	0.315131	-0.143845	0.47206	0.495478	0.0230772	0.308727	0.343909	0.0494732	0.762279	-0.671289	0.251286
Kmarxianus_Y179_311	1	630201..631976	KLMA_10532	TAT2	0.410135	0.274747	0.322717	0.270961	0.760416	0.000659573	0.815292	0.0175019	0.426772	0.104262	-0.425173	0.45484
Kmarxianus_Y179_312	1	join(632494..632509,632650..634088)	KLMA_10531	UBP6	-0.20289	0.602675	0.1033	0.724269	0.018423	1	0.396474	0.291247	0.486178	0.09159	1.28107	0.0322512
Kmarxianus_Y179_313	1	complement(634420..634887)	KLMA_10530	MIC19	0.0299542	0.934208	0.365406	0.124828	-0.416928	0.0409076	-0.282765	0.454446	-0.0774469	0.901131	-0.422244	0.504709
Kmarxianus_Y179_314	1	636351..638378	KLMA_10528	YOL019W	0.402727	0.304656	-0.0916252	0.664312	-0.00310651	0.891332	0.0695124	0.810412	-0.0150925	0.950769	0.455299	0.411785
Kmarxianus_Y179_315	1	complement(638587..639681)	KLMA_10527	TLG2	-0.40487	0.246295	-0.113799	0.565962	0.0687809	0.867059	-0.294901	0.400205	-0.230841	0.511215	0.26076	0.590465
Kmarxianus_Y179_316	1	640032..641228	KLMA_10526	FAL1	0.288194	0.313345	-0.261554	0.369423	1.01357	0.0101287	0.224046	0.708222	-0.790237	0.0278498	-0.451563	0.471357
Kmarxianus_Y179_317	1	complement(641271..641690)	KLMA_10525	ATG31	-0.852087	0.0202029	-0.276143	0.33342	0.0139195	1	0.161547	0.719862	-0.192557	0.735148	0.293772	0.618603
Kmarxianus_Y179_318	1	642403..643782	KLMA_10524	SES1	-0.0154208	0.934293	0.05089	0.895501	0.140918	0.575178	-0.562019	0.159766	-0.568869	0.0915269	-0.677955	0.248481
Kmarxianus_Y179_319	1	complement(644190..645905)	KLMA_10523	GIP1	0.633053	0.0754243	0.15076	0.630041	-0.133069	0.44958	1.42072	6.49888e-05	1.02	0.000695635	1.5436	0.00684833
Kmarxianus_Y179_320	1	complement(646527..647585)	KLMA_10522	ZTA1	-0.187588	0.715101	-0.331144	0.170895	-0.424805	0.0546437	-1.14717	0.00800303	-0.973761	0.00481124	-1.1514	0.0733445
Kmarxianus_Y179_321	1	648680..649216	KLMA_10521	FMP23	-0.110399	0.681808	1.00494	0.0242374	0.0856759	0.937143	-0.000205569	0.9541	-0.151602	0.857688	-1.2703	0.0588876
Kmarxianus_Y179_322	1	join(650064..650108,650525..650950)	_	RPS11B	0.140357	0.695046	0.429158	0.151427	0.31213	0.223138	0.582965	0.162274	-0.439061	0.247257	-1.42908	0.0466707
Kmarxianus_Y179_323	1	complement(651353..652075)	KLMA_10520	YKL070W	-0.332411	0.324126	-0.169223	0.381455	-1.049	7.0804e-07	-1.3245	0.000189232	-0.405816	0.218493	-0.185348	0.817889
Kmarxianus_Y179_324	1	652835..654652	KLMA_10519	ARN1	-0.0523324	0.999933	-0.520401	0.0157969	-0.605751	0.00322775	-0.454259	0.181811	-0.88967	0.00261381	-3.02945	2.42203e-06
Kmarxianus_Y179_325	1	654895..655452	_	_	0.136036	0.720578	0.282645	0.579428	-0.105486	0.746069	-0.506852	0.168642	0.0254552	0.87828	-0.186314	0.809463
Kmarxianus_Y179_326	1	656383..658053	KLMA_10518	INU1	-1.44678	0.000550015	-1.57577	1.93978e-10	-1.21537	2.3926e-07	-0.30306	0.554475	0.881806	0.0466907	0.997517	0.327839
Kmarxianus_Y179_327	1	658608..659297	KLMA_10517	_	-0.272546	0.619808	-0.00821168	0.94473	0.215976	0.466098	-0.0833403	0.897934	0.0991723	0.708004	-0.205368	0.779463
Kmarxianus_Y179_328	1	660344..661432	KLMA_10516	PGU1	-1.20086	0.00572344	-1.92113	6.21318e-13	-0.184399	0.295727	-1.60235	6.44619e-05	-0.247131	0.494553	0.749417	0.154406
Kmarxianus_Y179_329	1	complement(661742..663691)	KLMA_10515	_	0.371145	0.288465	0.172275	0.47972	0.169654	0.480972	-0.809874	0.02714	-0.102569	0.818665	-0.536726	0.360973
Kmarxianus_Y179_330	1	complement(663976..665175)	KLMA_10514	BAT1	-0.276787	0.59175	-0.248276	0.350269	0.0823929	0.776638	-0.239766	0.636001	0.190763	0.552907	-0.295858	0.710117
Kmarxianus_Y179_331	1	665771..666493	KLMA_10513	FAU1	-0.884536	0.0082332	-0.789051	0.000430163	-0.190522	0.438671	-0.747207	0.0468648	-0.190043	0.602411	-1.84386	0.00166765
Kmarxianus_Y179_332	1	complement(666532..667371)	KLMA_10512	FMP10	-0.402913	0.337215	0.111052	0.740499	-0.293195	0.147815	-0.646755	0.116677	-0.590662	0.0871098	-1.22531	0.0558233
Kmarxianus_Y179_333	1	667657..669126	KLMA_10511	SET5	-0.0871017	0.857473	0.257526	0.277105	-0.0670931	0.689805	-0.0301262	0.951932	0.059607	0.788221	-0.149681	0.829323
Kmarxianus_Y179_334	1	complement(669539..671020)	KLMA_10510	SKN7	0.242782	0.403954	-0.189957	0.293188	0.429904	0.0812588	0.81358	0.0294421	0.446731	0.133863	0.230746	0.664615
Kmarxianus_Y179_335	1	671641..672447	KLMA_10509	ELP6	-0.064013	0.990296	-0.479657	0.0707432	0.452534	0.236339	0.122578	0.753303	-0.275025	0.502342	-0.373153	0.477195
Kmarxianus_Y179_336	1	complement(672492..674273)	KLMA_10508	TGL3	0.00937915	0.907037	0.248003	0.292016	-0.406708	0.0373327	-0.708384	0.0501217	-0.395858	0.192451	-0.378112	0.548137
Kmarxianus_Y179_337	1	674770..675471	KLMA_10507	PRE5	-0.332301	0.474154	-0.146141	0.496562	0.0646491	0.791731	0.323801	0.365512	0.284253	0.317037	0.426178	0.441016
Kmarxianus_Y179_338	1	675927..678053	KLMA_10506	ATM1	0.354065	0.28615	-0.0401044	0.808691	0.261363	0.255086	0.475105	0.152926	0.753936	0.0115302	1.32874	0.0456282
Kmarxianus_Y179_339	1	678528..680057	KLMA_10505	ADE4	-0.0798029	0.891076	0.0787979	0.846039	0.380713	0.0855038	0.82436	0.0138698	0.827419	0.00403791	1.03198	0.0883759
Kmarxianus_Y179_340	1	680463..681611	KLMA_10504	DYN3	0.811181	0.0499206	-0.209314	0.444971	0.12098	0.607271	-0.638958	0.201557	-0.174635	0.628144	-1.09759	0.0872668
Kmarxianus_Y179_341	1	682071..684209	KLMA_10503	RNH70	0.357925	0.300875	-0.244026	0.281524	0.0208821	0.968218	0.194636	0.591467	0.148266	0.545791	0.430048	0.503934
Kmarxianus_Y179_342	1	complement(684314..684859)	KLMA_10502	RTT102	-0.303971	0.409938	0.0142459	0.992116	-0.0218811	0.876175	0.0450859	0.931327	-0.0337864	0.983323	0.331983	0.54697
Kmarxianus_Y179_343	1	685439..688606	KLMA_10501	TAF1	0.630188	0.127126	-0.0413658	0.784962	0.178622	0.436108	-0.219252	0.584716	0.0877594	0.71812	0.216513	0.682344
Kmarxianus_Y179_344	1	complement(688683..689141)	KLMA_10500	LIP1	-0.878316	0.0167543	-0.44613	0.056426	0.143377	0.510776	-0.126992	0.747363	0.183633	0.429919	-0.608359	0.332622
Kmarxianus_Y179_345	1	complement(689459..691081)	KLMA_10499	PRC1	-0.342452	0.501884	-0.435982	0.0959596	-0.380456	0.125986	-0.453958	0.384387	-0.343011	0.448476	-0.67206	0.496038
Kmarxianus_Y179_346	1	692182..693843	KLMA_10498	LCB1	0.0102328	0.881817	0.229561	0.444189	0.317323	0.171048	0.211129	0.532487	0.306022	0.262344	0.717587	0.232207
Kmarxianus_Y179_347	1	694291..694857	KLMA_10497	YMR295C	-0.301374	0.497357	-0.19675	0.357774	-0.0830694	0.703938	-0.446533	0.299193	-0.255898	0.520054	-0.749181	0.270857
Kmarxianus_Y179_348	1	695485..696180	KLMA_10496	EFG1	0.202095	0.508646	-0.28897	0.264065	1.12941	0.00342692	1.30038	0.00637899	0.801198	0.0319248	0.446435	0.559688
Kmarxianus_Y179_349	1	complement(696227..702103)	KLMA_10495	SLH1	0.319839	0.380921	0.0791246	0.772362	0.290422	0.190926	0.129378	0.669866	-0.155424	0.636482	0.478747	0.397184
Kmarxianus_Y179_350	1	complement(702379..703482)	KLMA_10494	JNM1	-0.10564	0.840989	0.119086	0.653503	-0.191178	0.515989	0.0336515	0.939674	0.307998	0.362321	1.16535	0.0479365
Kmarxianus_Y179_351	1	703765..705162	KLMA_10493	HER2	-0.0968668	0.850017	0.47321	0.039334	-0.124166	0.510493	-0.495965	0.156989	-0.0124627	0.940174	-0.377773	0.545736
Kmarxianus_Y179_352	1	complement(705329..709474)	KLMA_10491	YTA7	0.869591	0.072596	0.0795789	0.859169	0.18335	0.478666	-0.571294	0.234926	-0.066447	0.93852	-0.621286	0.474991
Kmarxianus_Y179_353	1	complement(710151..>710549)	_	GOT1	-0.546534	0.0729781	0.455157	0.0531503	0.263053	0.400125	0.980445	0.0222797	0.672609	0.0631759	0.958129	0.106598
Kmarxianus_Y179_354	1	711163..711792	KLMA_10489	HUA1	1.14366	0.00584374	0.614894	0.0323789	0.166855	0.417775	0.189584	0.5875	-0.168949	0.646122	-0.61593	0.403353
Kmarxianus_Y179_355	1	712194..712931	KLMA_10488	FOL2	-0.612732	0.13487	-0.626179	0.00214288	0.136682	0.538225	0.759982	0.0316861	0.902556	0.00267175	1.12423	0.0721578
Kmarxianus_Y179_356	1	complement(713210..714919)	KLMA_10487	TDA1	-0.376724	0.340584	0.131471	0.706038	-0.178516	0.393564	0.207482	0.552731	0.152104	0.610362	-0.0227471	0.959301
Kmarxianus_Y179_357	1	complement(715674..717827)	KLMA_10486	YGR266W	0.788402	0.0435872	0.280384	0.241601	0.350935	0.106735	0.261888	0.460992	-0.0468171	0.898383	0.459128	0.462839
Kmarxianus_Y179_358	1	718700..720235	KLMA_10484	HAS1	0.168403	0.578377	-0.0997734	0.568756	0.921668	0.000284359	0.552896	0.095578	-0.330344	0.302842	-1.07992	0.0568457
Kmarxianus_Y179_359	1	720891..723152	KLMA_10483	MES1	0.111027	0.695439	0.0861782	0.823763	0.0605035	0.863578	0.207095	0.581522	0.241182	0.401948	0.850402	0.19142
Kmarxianus_Y179_360	1	723527..724321	KLMA_10482	BUD32	-0.397959	0.27147	0.186974	0.411199	-0.238673	0.304408	-0.0959177	0.797857	-0.264823	0.464308	-0.291758	0.647401
Kmarxianus_Y179_361	1	complement(724387..725634)	KLMA_10481	ABZ2	0.0316691	0.864822	0.185004	0.470672	-0.401044	0.0675105	-0.595225	0.087732	-0.508857	0.0980296	-1.4844	0.0175177
Kmarxianus_Y179_362	1	726649..729141	KLMA_10480	APL6	0.573431	0.144033	0.563379	0.0214588	0.139298	0.578372	0.693669	0.0462796	0.912717	0.00101726	1.67498	0.00423306
Kmarxianus_Y179_363	1	complement(729218..732127)	KLMA_10479	HSH155	0.469465	0.160026	-0.0295755	0.801282	0.349065	0.198543	-0.0485118	0.875273	0.0282725	0.808058	-0.236025	0.709423
Kmarxianus_Y179_364	1	732399..734300	KLMA_10478	GPI16	0.0778968	0.773689	0.0662768	0.836911	0.053422	0.861902	0.225462	0.484114	0.419898	0.127459	1.00512	0.077792
Kmarxianus_Y179_365	1	complement(734421..735308)	KLMA_10477	IKI1	-0.0725192	0.800729	0.445586	0.0474394	0.487632	0.094012	0.382815	0.299437	-0.0628296	0.910287	-0.459639	0.420574
Kmarxianus_Y179_366	1	736079..740587	KLMA_10476	KOG1	0.478629	0.212375	0.0336641	0.911958	0.0555425	0.842577	0.084955	0.782146	0.485406	0.0643806	1.04725	0.0739256
Kmarxianus_Y179_367	1	complement(740795..742321)	KLMA_10475	TNA1	-0.303114	0.557031	-0.526851	0.0567086	0.678603	0.00187098	0.534803	0.179941	-1.13918	0.0017445	-2.56344	0.00380154
Kmarxianus_Y179_368	1	743561..746698	KLMA_10473	RAD2	0.71911	0.0610158	-0.125112	0.576019	-0.0610407	0.701477	-0.470084	0.179644	-0.356907	0.244576	-1.02428	0.0944534
Kmarxianus_Y179_369	1	747051..747824	KLMA_10472	PFS1	1.59169	0.00528254	-0.347387	0.473423	0.297098	0.473545	1.26102	0.0149242	1.31406	0.00164592	1.98056	0.000999277
Kmarxianus_Y179_370	1	748093..749205	KLMA_10471	MTM1	-0.218659	0.602721	0.242587	0.354414	-0.163511	0.499576	-0.23705	0.520043	0.254339	0.353396	0.437486	0.4123
Kmarxianus_Y179_371	1	complement(749444..751423)	KLMA_10469	SSP1	1.88875	5.29703e-06	0.0579082	0.917792	-0.094063	0.637133	1.09952	0.00393596	1.06489	0.000416968	1.66211	0.00351903
Kmarxianus_Y179_372	1	complement(751838..753316)	KLMA_10468	GND1	-0.00192807	0.942768	-0.102823	0.637217	0.114758	0.711649	-0.190506	0.697549	-0.218408	0.621238	0.373686	0.587237
Kmarxianus_Y179_373	1	complement(756036..758240)	KLMA_10467	_	0.341884	0.409569	-0.231132	0.222636	0.280249	0.20523	-0.151445	0.692315	0.0879606	0.660516	0.39592	0.468119
Kmarxianus_Y179_374	1	complement(758379..759080)	KLMA_10466	SVP26	-0.413481	0.263398	0.208153	0.395801	0.239264	0.281286	0.68517	0.0386268	0.550877	0.0421783	0.231883	0.631972
Kmarxianus_Y179_375	1	complement(760118..762103)	KLMA_10465	STB5	0.282803	0.396911	0.367401	0.114752	0.0340983	0.907201	0.376084	0.241498	0.574714	0.0345707	0.561678	0.334727
Kmarxianus_Y179_376	1	complement(762348..763616)	KLMA_10464	FMO1	-0.467386	0.256449	0.135891	0.653439	0.00827048	1	-0.296861	0.466321	-0.00275211	0.902909	0.2256	0.667787
Kmarxianus_Y179_377	1	complement(763780..764244)	KLMA_10463	CTR2	-0.409898	0.343936	-0.119048	0.516101	0.123687	0.61766	-0.0120368	0.965356	-0.480075	0.128359	-0.271771	0.648402
Kmarxianus_Y179_378	1	complement(764652..765965)	KLMA_10462	ENO	-0.732034	0.297064	-0.456608	0.00338323	0.589625	0.0458043	-0.368801	0.505047	-0.820741	0.0736277	-1.10349	0.250784
Kmarxianus_Y179_379	1	complement(767166..769502)	KLMA_10461	SPC97	0.994084	0.0213391	0.296984	0.244537	0.432361	0.106532	-0.737434	0.0868297	-0.569047	0.0755132	-1.35377	0.0201625
Kmarxianus_Y179_380	1	770147..773758	KLMA_10460	PDR1	0.882607	0.04791	0.1559	0.589577	0.0592392	0.840648	0.0461595	0.887488	0.552512	0.096326	0.230711	0.753132
Kmarxianus_Y179_381	1	complement(774252..776702)	KLMA_10459	PUF4	0.715994	0.0909391	0.0548947	0.827954	0.370636	0.0930735	0.616571	0.061662	0.689818	0.0121271	1.38019	0.0228463
Kmarxianus_Y179_382	1	777300..777881	_	_	0.00852534	1	1.76698	0.0257816	0.900325	0.239011	1.49951	0.0625182	1.40755	0.0387299	0.728974	0.419578
Kmarxianus_Y179_383	1	778638..779849	KLMA_10458	KYE1	-0.521788	0.39627	-0.3257	0.161189	0.0897762	0.768887	-0.212629	0.687814	-0.231678	0.595796	-0.342717	0.680178
Kmarxianus_Y179_384	1	complement(781604..784303)	KLMA_10457	PMA1	0.525253	0.330553	0.0104576	0.936971	-0.0944219	0.686762	-0.643695	0.216419	-0.135885	0.81059	-0.972744	0.318251
Kmarxianus_Y179_385	1	complement(788542..789423)	KLMA_10456	SEN34	-0.156406	0.720588	-0.209378	0.292962	-0.177022	0.405016	0.177511	0.583872	-0.373299	0.261083	-1.04354	0.131537
Kmarxianus_Y179_386	1	790482..794306	KLMA_10454	PMC1	0.928669	0.021584	-0.0805757	0.628789	0.00193319	0.975519	-0.668904	0.159673	-0.92554	0.0207751	-1.106	0.250047
Kmarxianus_Y179_387	1	complement(794607..795377)	KLMA_10453	COG7	-0.586092	0.0855953	0.0883654	0.692335	0.0795194	0.847936	0.476423	0.283465	0.692749	0.0412701	1.56119	0.00978751
Kmarxianus_Y179_388	1	complement(795711..796997)	KLMA_10452	RPN14	-0.315675	0.451176	-0.0415929	0.741597	0.062842	0.820923	0.108445	0.740808	0.253707	0.330707	0.129076	0.802068
Kmarxianus_Y179_389	1	797483..799348	KLMA_10451	RFA1	-0.325249	0.476432	-0.388687	0.0980351	-0.275334	0.167519	-0.460658	0.196858	-0.618007	0.0649438	0.18496	0.674689
Kmarxianus_Y179_390	1	complement(799574..801316)	KLMA_10450	CDH1	-0.0107431	0.989537	-0.372725	0.0928389	0.0148729	0.995023	0.214653	0.530028	0.551545	0.05678	0.838968	0.133427
Kmarxianus_Y179_391	1	complement(801651..803021)	KLMA_10449	SWD1	-0.25701	0.513169	0.0436316	0.945893	0.119056	0.69305	0.743036	0.0562114	0.70712	0.0277051	1.59513	0.00587674
Kmarxianus_Y179_392	1	803667..804317	KLMA_10448	ERP1	-0.779318	0.0332752	-0.0121208	0.91665	0.144346	0.541235	0.21373	0.559783	-0.0710758	0.891389	0.567699	0.292752
Kmarxianus_Y179_393	1	complement(804412..805566)	KLMA_10446	NUP60	0.780762	0.0682789	-0.0278976	0.854607	0.0414937	0.881295	0.273692	0.403306	0.382286	0.152343	0.9628	0.100287
Kmarxianus_Y179_394	1	complement(join(805874..805933,806076..806165))	_	NUP60	0.754337	0.0755201	-0.054368	0.738078	0.268353	0.413229	-0.205916	0.646609	0.19182	0.556746	0.245405	0.637807
Kmarxianus_Y179_395	1	complement(806485..>809949)	KLMA_10445	TFC3	0.445062	0.226253	0.256618	0.284273	-0.21269	0.294532	-0.0850702	0.799232	0.0214112	0.816964	0.883954	0.106319
Kmarxianus_Y179_396	1	join(810503..810659,811084..811112)	_	_	-0.39133	0.207426	0.248682	0.227342	0.0444609	0.881262	-0.132572	0.720806	-0.334577	0.330509	-1.59627	0.00677834
Kmarxianus_Y179_397	1	811590..812597	KLMA_10443	_	-0.0300173	0.913207	0.471859	0.205573	-0.0452957	0.851449	-0.283206	0.48045	-0.332844	0.405383	0.535226	0.365174
Kmarxianus_Y179_398	1	complement(813619..814794)	KLMA_10442	DOM34	-0.573943	0.145547	-0.171838	0.404982	-0.0419594	0.796184	0.0443614	0.911539	-0.225407	0.544558	0.411495	0.470318
Kmarxianus_Y179_399	1	complement(815174..815722)	KLMA_10441	RER1	-0.656591	0.0674102	0.479203	0.0414789	0.233914	0.342606	0.426911	0.21644	-0.340043	0.301052	-1.00671	0.0891552
Kmarxianus_Y179_400	1	<816468..817208	KLMA_10440	YCL002C	-0.54679	0.181491	0.267808	0.264851	-0.32541	0.113542	-0.2994	0.375804	-0.218383	0.525993	-0.890425	0.127736
Kmarxianus_Y179_401	1	complement(817323..818948)	KLMA_10439	PGS1	-0.141381	0.868314	-0.136212	0.512204	0.058136	0.848177	-0.372977	0.28156	0.125307	0.577906	0.773049	0.155305
Kmarxianus_Y179_402	1	complement(819840..820811)	KLMA_10438	_	-0.766666	0.0350681	0.270908	0.205672	-0.233723	0.335887	0.308585	0.464736	-0.25292	0.616303	0.462614	0.439766
Kmarxianus_Y179_403	1	complement(821988..823097)	KLMA_10437	DAO1	-0.564577	0.169379	0.0221695	0.997542	-0.198009	0.360159	-0.54272	0.181859	-0.240019	0.516335	0.281134	0.644078
Kmarxianus_Y179_404	1	823477..824499	KLMA_10436	HIS2	0.0747477	0.950694	1.06847	1.18751e-06	-0.0922918	0.61245	1.08263	0.00291017	0.9689	0.00246295	1.63767	0.00457224
Kmarxianus_Y179_405	1	complement(824743..826776)	KLMA_10435	YHR020W	0.0195023	0.870746	0.228415	0.445953	0.272253	0.241437	-0.158666	0.708219	-0.277219	0.453147	0.174972	0.774482
Kmarxianus_Y179_406	1	827115..828773	KLMA_10434	DED81	0.195186	0.58524	0.335253	0.259432	0.152813	0.559449	-0.0108941	0.995691	0.0576774	0.772386	0.536275	0.421831
Kmarxianus_Y179_407	1	829264..830652	KLMA_10433	ARG4	0.225585	0.562744	0.640061	0.0243644	-0.0614285	0.758961	-0.0430255	0.941643	0.645341	0.045965	1.09964	0.12658
Kmarxianus_Y179_408	1	complement(830827..831987)	KLMA_10432	YSD83	-0.357685	0.385158	-0.021462	0.862916	-0.382609	0.0646944	-0.845595	0.0517939	-0.722486	0.0497713	-1.42469	0.0427694
Kmarxianus_Y179_409	1	join(832692..832738,832981..834178)	KLMA_10431	LSB3	-0.0619149	0.95227	-0.0543892	0.797556	-0.00855069	0.97241	0.134363	0.744427	0.344719	0.323504	1.16194	0.134683
Kmarxianus_Y179_410	1	complement(834646..837420)	KLMA_10430	PES4	0.571011	0.113996	-0.237262	0.343006	-0.43059	0.0358922	0.425486	0.242969	0.624814	0.0466315	0.750802	0.179683
Kmarxianus_Y179_411	1	complement(838201..840264)	KLMA_10429	NDI1	-0.153144	0.780337	-0.114541	0.635441	-0.729495	0.00172217	-1.03017	0.0186867	0.0903406	0.687364	-0.148865	0.853978
Kmarxianus_Y179_412	1	complement(841335..842324)	_	_	-0.739236	0.0601286	-0.614734	0.00335644	0.0199912	0.945916	-0.439641	0.255323	-0.0419407	0.885382	-0.336984	0.558178
Kmarxianus_Y179_413	1	842361..843311	KLMA_10428	SUR7	-0.577234	0.197254	-0.603967	0.0144958	-0.097501	0.647169	-1.0166	0.0200934	-0.434382	0.223375	-0.819804	0.231289
Kmarxianus_Y179_414	1	844714..846102	KLMA_10427	GAL80	-0.311132	0.453562	-0.0969359	0.686823	-0.411657	0.059462	-0.607041	0.123726	-0.487344	0.166733	-2.13632	0.00415557
Kmarxianus_Y179_415	1	846911..847837	KLMA_10426	AIM32	0.00183412	0.93813	0.0133444	0.952122	-0.507579	0.0813071	-0.557449	0.214981	-0.364187	0.345284	1.04883	0.0700101
Kmarxianus_Y179_416	1	complement(847828..851709)	KLMA_10425	RSE1	0.364555	0.296817	0.337982	0.128275	0.0326445	0.927764	0.295101	0.409901	0.62737	0.0347219	1.05834	0.124527
Kmarxianus_Y179_417	1	852994..854151	KLMA_10424	GSF2	-0.704542	0.122613	-0.367256	0.160648	-0.359419	0.0816032	-0.462574	0.225928	-0.287293	0.427224	0.0414176	0.930457
Kmarxianus_Y179_418	1	complement(854735..856306)	_	KCH1	0.582169	0.0942828	-0.242772	0.282228	0.203516	0.49096	0.843388	0.0304821	-0.0568306	0.928534	-0.541717	0.294417
Kmarxianus_Y179_419	1	complement(856908..858776)	KLMA_10422	BFA1	0.465277	0.186345	0.105304	0.650424	0.0816301	0.706284	0.0394653	0.916704	0.0884678	0.665671	-0.0173642	0.996772
Kmarxianus_Y179_420	1	859185..861044	KLMA_10421	PRP39	0.317355	0.361156	-0.112252	0.570482	0.332655	0.23383	0.697429	0.0745309	0.706585	0.0206362	1.01366	0.0831584
Kmarxianus_Y179_421	1	complement(861113..862813)	KLMA_10420	RAD7	0.136821	0.676135	0.12922	0.58451	-0.152307	0.434725	0.0290491	0.943358	-0.343924	0.265812	-0.659277	0.262796
Kmarxianus_Y179_422	1	complement(863079..864518)	KLMA_50326	GYP5	-0.188125	0.650597	0.0742912	0.755669	-0.0173813	0.89776	-0.214333	0.557987	-0.160435	0.640968	-0.366336	0.571347
Kmarxianus_Y179_423	1	864536..865012	_	GYP1	0.0329914	0.941664	0.310302	0.579041	-0.128247	0.915494	-1.0081	0.12929	-0.463011	0.38999	-0.966475	0.258888
Kmarxianus_Y179_424	1	<864988..865269	KLMA_10419	folD	-0.0639147	0.850824	-0.0328419	0.838814	0.724076	0.0961685	0.775824	0.144234	0.351862	0.463827	0.0907178	0.920119
Kmarxianus_Y179_425	1	complement(865485..866513)	KLMA_10418	RPF2	-0.130814	0.757025	-0.387837	0.0568395	0.934034	0.00704745	0.700215	0.0905043	-0.268524	0.483353	-0.587047	0.232949
Kmarxianus_Y179_426	1	867027..870380	KLMA_10417	NUP133	0.602513	0.12575	0.172877	0.515596	0.0383319	0.921178	0.341862	0.304123	0.393296	0.137262	1.15522	0.0512296
Kmarxianus_Y179_427	1	complement(870436..870804)	KLMA_10416	DAD2	-0.0870348	0.779074	-0.0241186	0.911551	-0.252657	0.515344	-0.122653	0.782347	-0.159798	0.746305	0.416444	0.492527
Kmarxianus_Y179_428	1	871327..873255	KLMA_10415	SGO1	0.789489	0.0622041	-0.564259	0.0363057	0.177314	0.725473	0.550678	0.293694	0.545565	0.184702	0.585793	0.344032
Kmarxianus_Y179_429	1	complement(873362..874276)	KLMA_10414	CDC21	-0.664211	0.0868692	-0.501128	0.0170343	-0.0973542	0.67088	-0.275887	0.46245	-0.499882	0.143437	0.650283	0.244434
Kmarxianus_Y179_430	1	874735..875724	KLMA_10413	UFE1	0.291904	0.373967	0.136068	0.553102	-0.196358	0.416074	-0.0183569	1	-0.129056	0.786182	0.723936	0.212869
Kmarxianus_Y179_431	1	complement(<875773..878653)	KLMA_10412	HBS1	0.252386	0.480307	-0.111272	0.591326	-0.227066	0.267843	-0.813023	0.0265884	-0.316441	0.342547	-0.00659921	0.989481
Kmarxianus_Y179_432	1	879054..879536	KLMA_10411	_	0.32696	0.52608	0.809011	0.0141658	0.225167	0.60846	0.865097	0.0948436	0.767083	0.0901549	-0.448405	0.702747
Kmarxianus_Y179_433	1	complement(879729..880322)	KLMA_10410	MRPL20	-0.260361	0.385253	0.282684	0.20252	0.112172	0.687944	-0.641749	0.0744345	-0.323162	0.327023	-1.23621	0.0359443
Kmarxianus_Y179_434	1	880783..884046	KLMA_10409	PRP16	0.488441	0.170666	0.0184319	0.990785	-0.0232914	0.881016	0.447478	0.19019	0.493838	0.0637178	0.121246	0.782126
Kmarxianus_Y179_435	1	complement(884087..885127)	KLMA_10408	OMA1	-0.607712	0.0855861	-0.165431	0.376318	-0.630209	0.0135873	-0.614547	0.0766406	-0.783181	0.0103271	-0.53787	0.372113
Kmarxianus_Y179_436	1	885382..886101	KLMA_10407	RTS2	-0.07208	0.854425	0.237509	0.448859	0.196174	0.528872	0.265004	0.518193	-0.0641705	0.93225	0.397179	0.533707
Kmarxianus_Y179_437	1	complement(886245..887162)	KLMA_10406	TVP38	-0.452003	0.203112	0.28242	0.231306	-0.184488	0.335043	0.0823261	0.839807	-0.272044	0.463302	0.444248	0.419097
Kmarxianus_Y179_438	1	887822..888673	_	_	0.296556	0.568808	0.452662	0.328034	-0.485979	0.357713	-0.656186	0.366724	-0.811742	0.156859	0.0822608	1
Kmarxianus_Y179_439	1	889040..889813	KLMA_10405	BUD21	0.178558	0.523314	-0.361232	0.0711814	0.737964	0.0275551	0.850472	0.0596542	0.390493	0.231967	0.381994	0.52474
Kmarxianus_Y179_440	1	complement(889885..890787)	KLMA_10404	ATX2	-0.734109	0.047348	-0.0367334	0.820875	0.0366264	0.963922	0.647001	0.149893	0.438311	0.256693	1.03503	0.108335
Kmarxianus_Y179_441	1	891107..893215	KLMA_10403	DIA2	-0.144025	0.798435	0.194963	0.404857	-0.266855	0.280203	0.260127	0.624897	0.356749	0.262323	1.46815	0.0168882
Kmarxianus_Y179_442	1	complement(893334..895655)	KLMA_10402	TGL4	0.244472	0.472967	0.0218296	0.98709	-0.0595844	0.747059	-0.0758712	0.841371	0.145069	0.610572	0.301228	0.630472
Kmarxianus_Y179_443	1	complement(895910..896704)	KLMA_10401	ERF4	0.53322	0.209308	0.464959	0.167194	0.0623168	0.8083	-0.359182	0.383368	-0.212898	0.466287	-0.48818	0.451197
Kmarxianus_Y179_444	1	896874..897521	KLMA_10400	MDY2	-0.621064	0.0748678	0.11473	0.666935	-0.0819653	0.616397	0.115171	0.705116	-0.117486	0.798231	0.325003	0.558569
Kmarxianus_Y179_445	1	complement(897581..899410)	KLMA_10399	MSB3	0.219889	0.539306	0.153766	0.563281	-0.120291	0.514218	-0.486512	0.160138	0.119375	0.547432	0.692878	0.210745
Kmarxianus_Y179_446	1	900040..901845	KLMA_10398	RIM21	-0.0126519	0.950156	0.0828758	0.828138	0.462946	0.194721	0.276359	0.570497	0.839761	0.0195514	1.47868	0.00969708
Kmarxianus_Y179_447	1	complement(901991..903478)	KLMA_10397	MRX6	-0.0496144	0.920172	-0.0956808	0.6465	-0.137916	0.476197	-0.0762968	0.826977	-0.0950257	0.774959	-0.526949	0.372428
Kmarxianus_Y179_448	1	903840..908747	_	MON2	0.346291	0.367754	0.114615	0.676642	0.0749851	0.82361	0.543341	0.117596	0.611191	0.0249628	1.33501	0.0173832
Kmarxianus_Y179_449	1	complement(908819..911476)	KLMA_30058	STE20	0.369243	0.346382	-0.107964	0.611748	0.162208	0.512522	-0.0908134	0.812028	0.0744453	0.700032	0.376219	0.515284
Kmarxianus_Y179_450	1	912036..912530	_	PTH4	0.187955	0.666984	0.389962	0.4354	0.413798	0.339677	0.207674	0.718653	-0.0645965	0.992365	-0.645315	0.362269
Kmarxianus_Y179_451	1	complement(912583..914793)	_	TRF5	0.422383	0.217241	-0.229428	0.27424	0.268525	0.229837	0.134676	0.625542	-0.0628661	0.923916	-0.294031	0.5984
Kmarxianus_Y179_452	1	complement(915328..916620)	KLMA_30109	YMR111C	0.0405231	0.818798	-0.167785	0.402423	0.0925535	0.738126	0.843993	0.0342843	0.728483	0.0166946	1.29067	0.0231612
Kmarxianus_Y179_453	1	complement(917790..918110)	_	TOS6	0.376684	0.377227	0.336209	0.220052	0.718351	0.000786343	0.201227	0.618108	0.713567	0.00754619	1.64899	0.00399923
Kmarxianus_Y179_454	1	complement(918845..920674)	_	RRI2	0.597693	0.155154	0.37516	0.140251	-0.195905	0.41733	-0.812212	0.0524256	-0.220969	0.567573	0.516476	0.380821
Kmarxianus_Y179_455	1	920914..921465	KLMA_40173	AHP1	-0.0444247	0.966641	0.535118	0.0199072	-0.609504	0.00390142	-1.10544	0.00618457	-1.14183	0.000687315	-0.909252	0.134204
Kmarxianus_Y179_456	1	921872..923365	KLMA_20326	MCH5	-0.125165	0.82081	-0.229006	0.257826	-0.503031	0.0354704	-0.485869	0.254795	-0.161864	0.674274	-0.229884	0.708207
Kmarxianus_Y179_457	1	join(923838..923949,924479..924927)	_	RPL18B	-0.515985	0.309225	0.401511	0.166245	0.838361	0.000324793	0.727515	0.0703126	-0.310155	0.385755	-1.02808	0.156016
Kmarxianus_Y179_458	1	join(925939..925958,926479..926893)	_	RPS19A	-0.629442	0.193546	0.295331	0.308534	0.433471	0.087896	0.462205	0.30142	-0.332337	0.412988	-1.19383	0.115042
Kmarxianus_Y179_459	1	927380..928789	KLMA_50570	HST4	0.0738638	0.768045	-0.388126	0.0798339	0.0110643	1	-0.163253	0.666895	0.415016	0.119202	0.528325	0.336494
Kmarxianus_Y179_460	1	929206..929778	_	SNM1	-0.179655	0.622106	0.0444055	0.836465	0.341217	0.392967	0.113508	0.70919	-0.292389	0.472692	-0.573973	0.378694
Kmarxianus_Y179_461	1	complement(929846..931480)	KLMA_60057	PEX28	-0.138835	0.794843	-0.0562809	0.742943	-0.229838	0.292199	-0.409311	0.265184	-0.2658	0.408661	-0.0586645	0.998156
Kmarxianus_Y179_462	1	931756..932697	KLMA_80377	GLE2	-0.0987534	0.820247	0.21024	0.36241	-0.185084	0.349671	0.168582	0.606091	0.319591	0.239499	0.305552	0.543292
Kmarxianus_Y179_463	1	complement(932778..934325)	_	_	0.626436	0.0662644	0.0195206	1	1.33631	6.32475e-09	2.08607	3.77882e-09	1.74896	8.60104e-09	1.55571	0.00614067
Kmarxianus_Y179_464	1	935034..936770	KLMA_80036	SGT2	0.621901	0.127492	0.36578	0.177109	0.388888	0.132161	0.704072	0.14644	1.19058	0.00412773	0.867863	0.389187
Kmarxianus_Y179_465	1	join(936885..936910,937291..937453)	_	SAE3	-0.251887	0.607819	0.382179	0.58443	0.524589	0.175207	1.32041	0.0067568	2.84618	2.47899e-14	1.07828	0.0265342
Kmarxianus_Y179_466	1	937916..939874	_	RKM4	0.422669	0.240119	0.618515	0.0201011	0.303599	0.201086	0.349075	0.353764	0.31649	0.273997	0.736449	0.29636
Kmarxianus_Y179_467	1	940233..940802	KLMA_80030	UTP23	-0.322915	0.411385	-0.225476	0.249257	0.653225	0.0320817	-0.118511	0.754971	-0.335079	0.306157	-1.68383	0.00440378
Kmarxianus_Y179_468	1	complement(940865..941500)	KLMA_40042	YLR326W	-0.395278	0.61504	-0.27717	0.454902	1.30561	0.000339052	-1.78353	8.69502e-07	-1.86658	4.25288e-08	-2.38395	0.000313849
Kmarxianus_Y179_469	1	941499..942800	KLMA_10396	YNG2	-0.576068	0.122685	-0.305919	0.123997	0.475932	0.088441	-0.271074	0.47438	-0.416136	0.177687	-0.480623	0.436971
Kmarxianus_Y179_470	1	942951..945065	KLMA_10395	YDR338C	0.307391	0.443894	-0.179937	0.382712	0.0844966	0.722219	0.284469	0.383547	-0.385308	0.18927	-0.377791	0.530448
Kmarxianus_Y179_471	1	946442..948214	KLMA_10394	GAP1	0.547061	0.152911	0.12474	0.575761	-0.28011	0.171914	-1.16095	0.00146414	-0.411952	0.17634	-0.506374	0.41289
Kmarxianus_Y179_472	1	949293..951266	KLMA_10393	_	0.981067	0.00474301	1.05248	0.000497475	-0.135193	0.456286	-0.865987	0.03924	-0.757749	0.0373592	-1.67476	0.0231727
Kmarxianus_Y179_473	1	952202..954529	KLMA_20102	SAT4	0.418035	0.248327	0.567309	0.00976184	-0.316793	0.0988038	-0.548653	0.127506	-0.709432	0.0425054	-1.77678	0.0115875
Kmarxianus_Y179_474	1	complement(954790..955206)	KLMA_10392	rplN	-0.367375	0.235402	0.200351	0.365546	-0.158331	0.429861	-0.934104	0.0120855	-0.644376	0.0405424	-2.13368	0.000545777
Kmarxianus_Y179_475	1	complement(955641..958061)	KLMA_10391	NNK1	0.458951	0.224063	-0.242476	0.258622	-0.136219	0.50719	0.00513429	0.916328	0.630079	0.024086	0.505945	0.369038
Kmarxianus_Y179_476	1	complement(958889..959173)	KLMA_10390	QCR8	-0.227366	0.437155	0.861207	0.00136842	-0.419907	0.0685182	-0.783634	0.115035	-0.21632	0.647677	-1.73805	0.0458974
Kmarxianus_Y179_477	1	complement(959667..960716)	KLMA_10389	FPS1	-0.608688	0.223013	-0.751362	0.00692365	0.183825	0.469347	-0.116788	0.826328	0.181767	0.467431	1.02577	0.063123
Kmarxianus_Y179_478	1	complement(961138..962385)	KLMA_10388	EBP2	0.447985	0.183733	-0.401543	0.0553212	1.04883	8.76799e-05	0.204269	0.520653	-0.24438	0.45093	-0.694394	0.184058
Kmarxianus_Y179_479	1	complement(962670..965495)	KLMA_10387	SNU114	0.360118	0.323306	0.0126116	0.981465	0.0226875	0.974047	0.37007	0.313369	0.413832	0.148147	0.405167	0.459068
Kmarxianus_Y179_480	1	965647..967308	KLMA_10386	TPO5	-0.0921218	0.839924	0.132143	0.618075	-0.150291	0.468881	0.16469	0.716382	0.335953	0.289439	0.38537	0.508582
Kmarxianus_Y179_481	1	complement(967486..969066)	KLMA_10385	ZRT3	0.0676378	0.792696	0.0489637	0.875671	-0.319557	0.121444	-0.430629	0.244575	-0.309244	0.347306	-0.779667	0.190825
Kmarxianus_Y179_482	1	969754..971940	KLMA_10384	LST4	0.16095	0.631387	0.0240279	0.967657	-0.0942856	0.610035	-0.550884	0.11945	-0.141885	0.734944	-0.657851	0.272079
Kmarxianus_Y179_483	1	972323..974461	KLMA_10383	SET2	0.265011	0.415637	-0.000645954	0.94333	0.0447288	0.827668	0.778874	0.0179914	0.828712	0.00288292	1.54628	0.00871089
Kmarxianus_Y179_484	1	974821..975384	_	ASG7	-0.976936	0.0533786	-0.421825	0.464954	-0.636452	0.109484	-0.779719	0.217261	-0.310281	0.528997	0.494876	0.436684
Kmarxianus_Y179_485	1	976534..977853	KLMA_10382	STE3	0.0140109	0.892259	-0.529488	0.0953951	-0.617654	0.00270825	0.652553	0.0746665	0.115659	0.576105	0.632982	0.236489
Kmarxianus_Y179_486	1	complement(978035..979774)	KLMA_50080	CPS1	0.016913	0.926015	-0.630288	0.0103226	-0.640431	0.00710948	-1.4393	0.000546373	-0.783468	0.0191529	-1.04042	0.145619
Kmarxianus_Y179_487	1	980534..980884	KLMA_10381	RFA3	-1.16829	0.00108181	-0.471353	0.0159271	-0.17633	0.539074	0.0816137	0.843227	-0.529145	0.102655	-1.05083	0.0884162
Kmarxianus_Y179_488	1	complement(981057..981881)	KLMA_10380	KRE9	0.39508	0.396328	1.05977	8.48154e-07	1.65283	4.14671e-15	1.36257	0.00136734	-0.37741	0.329155	-1.82904	0.0421187
Kmarxianus_Y179_489	1	984103..987045	KLMA_10379	SWI3	1.06482	0.0218617	0.0547837	0.871111	0.229324	0.302269	0.550342	0.107641	0.546398	0.0665242	0.725201	0.269738
Kmarxianus_Y179_490	1	987401..989431	KLMA_10378	COY1	0.272092	0.443637	0.230056	0.354919	-0.0851836	0.662014	-0.00626554	0.971962	0.163438	0.510163	0.833962	0.142317
Kmarxianus_Y179_491	1	complement(989569..990504)	KLMA_10376	RPL17B	-0.131436	0.878247	0.338819	0.235029	0.527941	0.0384421	0.661618	0.134604	-0.248348	0.543473	-1.40878	0.0647292
Kmarxianus_Y179_492	1	991420..992259	KLMA_10375	ATG27	-0.403967	0.316465	0.231712	0.382703	-0.14588	0.465492	-0.093677	0.831802	-0.367934	0.261241	-0.695781	0.267452
Kmarxianus_Y179_493	1	complement(992424..992765)	KLMA_10374	PFD1	-0.371246	0.286785	0.0437508	0.925956	0.050318	0.839692	0.817335	0.0198095	0.34275	0.19166	0.0400337	0.909081
Kmarxianus_Y179_494	1	993052..994041	KLMA_10373	ATP12	0.0399081	0.933675	0.235953	0.280803	0.303486	0.291984	-0.537303	0.130293	-0.249602	0.47855	-0.499878	0.40178
Kmarxianus_Y179_495	1	complement(994137..996590)	KLMA_10372	YJR030C	-0.191937	0.72883	-0.224253	0.288038	0.816724	0.000730898	0.764507	0.0532368	1.25002	0.000127797	2.23786	0.000116013
Kmarxianus_Y179_496	1	complement(997291..998520)	KLMA_10371	MNN11	0.0759132	0.74824	0.241286	0.362524	0.266077	0.217726	0.70199	0.0419261	0.791458	0.005059	1.32949	0.0321634
Kmarxianus_Y179_497	1	complement(999154..1000470)	KLMA_10370	FEN2	-0.41174	0.337762	-0.181671	0.331527	0.951795	2.93056e-05	-0.256386	0.46635	-0.0254122	0.991721	-0.444891	0.424184
Kmarxianus_Y179_498	1	complement(1000695..1001048)	KLMA_10369	GON7	-0.14636	0.729508	0.164823	0.460531	0.0892511	0.768177	-0.343306	0.397417	-0.132116	0.799248	-0.948087	0.129702
Kmarxianus_Y179_499	1	complement(<1001479..>1001844)	KLMA_10368	RIM1	-0.370866	0.413929	-0.133574	0.543594	0.131277	0.586903	0.435892	0.209675	-0.00309225	0.900962	0.0464869	0.913101
Kmarxianus_Y179_500	1	1002929..1003477	KLMA_10367	_	-0.0785493	0.980059	-0.463867	0.035874	-0.13525	0.610102	-0.665149	0.0880612	-0.327048	0.368432	-1.31897	0.0315254
Kmarxianus_Y179_501	1	complement(1003504..1004427)	KLMA_10366	_	0.031163	0.812779	-0.563692	0.00563947	0.299093	0.212373	0.046177	0.894701	0.105752	0.757695	0.317541	0.577946
Kmarxianus_Y179_502	1	1004937..1005497	KLMA_10365	PAM17	-0.750463	0.0512008	-0.0407983	0.795778	-0.154515	0.41824	-0.512765	0.155822	-0.30168	0.361422	-1.06074	0.0697722
Kmarxianus_Y179_503	1	1006803..1008401	KLMA_10364	DAS1	-0.0740797	0.895864	0.045977	0.88795	-0.0857269	0.629397	-0.605116	0.0767018	-0.483131	0.109123	-0.615637	0.33909
Kmarxianus_Y179_504	1	complement(1008632..1010596)	KLMA_10363	OAF3	0.0510944	0.773271	-0.122485	0.533524	0.218173	0.349969	0.740994	0.0316497	0.345271	0.179679	0.286312	0.670273
Kmarxianus_Y179_505	1	1011051..1012421	KLMA_10362	LAS1	0.337168	0.280581	-0.487671	0.0380043	0.572591	0.0690277	0.67525	0.0987343	0.429131	0.165481	1.00371	0.0907386
Kmarxianus_Y179_506	1	1013663..1014238	KLMA_10361	RPA34	-0.0818071	0.961047	0.0357809	1	1.04852	0.000801328	0.63623	0.0691415	-0.111858	0.794706	-1.97094	0.000694539
Kmarxianus_Y179_507	1	complement(1014343..1015194)	KLMA_10360	TFA2	-0.154863	0.753817	-0.0709592	0.682383	-0.0362132	0.823584	-0.109416	0.814082	-0.202187	0.569308	-0.0615719	0.928438
Kmarxianus_Y179_508	1	complement(1015889..1017001)	KLMA_10359	MRX5	0.0981992	0.771283	0.640475	0.0036684	-0.0297013	0.838057	-0.349705	0.379868	-0.30287	0.390529	-1.1073	0.102497
Kmarxianus_Y179_509	1	1017641..1018747	KLMA_10358	IDS2	-0.146632	0.761157	0.171393	0.51685	-0.0496356	0.768926	-0.0769954	0.888366	-0.0141037	0.924535	-0.414037	0.4964
Kmarxianus_Y179_510	1	1019202..1020044	KLMA_10357	SFH5	-0.548186	0.129955	-0.174818	0.374947	0.220764	0.393898	0.0467605	0.93417	-0.252582	0.443507	0.317821	0.543389
Kmarxianus_Y179_511	1	complement(1020190..1021344)	KLMA_10356	BIO2	-0.755315	0.0847334	-1.56271	3.38361e-11	-0.257271	0.215058	-1.29337	0.00371521	-0.670972	0.0698859	-1.00928	0.152218
Kmarxianus_Y179_512	1	1022354..1022728	KLMA_10355	_	-0.240273	0.512039	0.563335	0.0430821	0.89685	0.000105526	1.04416	0.0323051	1.39916	0.000377145	0.428337	0.580679
Kmarxianus_Y179_513	1	1023258..1023722	KLMA_10353	TIM17	-0.518594	0.166098	0.0599327	0.843747	0.0498419	0.880169	-0.348423	0.367492	-0.0735497	0.917793	-1.07382	0.0813452
Kmarxianus_Y179_514	1	complement(1024052..1026214)	KLMA_10352	YAK1	0.210555	0.571486	-0.213601	0.340856	-0.116585	0.567702	-0.460637	0.191609	0.111027	0.630615	0.541253	0.323385
Kmarxianus_Y179_515	1	1026668..1027270	KLMA_10351	RPB4	-0.453365	0.213265	-0.0327073	0.805164	0.0282482	0.894023	-0.300282	0.436292	-0.434879	0.172412	-0.218071	0.755794
Kmarxianus_Y179_516	1	complement(1027369..1028637)	KLMA_10350	YUR1	-0.361486	0.335728	0.216173	0.349736	-0.00178854	0.932574	-0.0128073	0.982046	-0.125271	0.783188	-0.286953	0.65429
Kmarxianus_Y179_517	1	complement(1028917..1029729)	KLMA_10349	UTP30	-0.124487	0.767586	-0.383911	0.107719	0.842748	0.0155361	0.468732	0.264509	0.193576	0.525721	0.157893	0.80574
Kmarxianus_Y179_518	1	complement(1030083..1031273)	KLMA_10348	TIF1	-0.0887742	0.935118	0.204986	0.504533	0.393393	0.126485	-0.474056	0.340634	-0.614905	0.140222	-1.00947	0.243155
Kmarxianus_Y179_519	1	complement(1032123..1033484)	KLMA_10347	GLG1	-0.280775	0.499928	-0.184388	0.371318	-0.675598	0.00145018	-0.872097	0.0256066	-0.675315	0.0341103	-0.617192	0.390322
Kmarxianus_Y179_520	1	complement(1034450..>1034689)	_	RPS21A	-0.271518	0.647316	0.263453	0.405294	0.494648	0.0444844	0.755569	0.071399	-0.104145	0.82969	-1.30999	0.0634068
Kmarxianus_Y179_521	1	1036020..1036526	KLMA_10346	_	-0.946525	0.345578	1.42453	0.0310967	0.488161	0.729812	1.97044	0.0320905	-0.316046	0.58204	-1.94708	0.0172748
Kmarxianus_Y179_522	1	complement(1036669..1038405)	KLMA_10345	TRM2	-0.205534	0.713452	-0.78649	0.000196051	1.05978	0.00291622	-0.435086	0.2312	-0.625882	0.0449224	-0.791053	0.162959
Kmarxianus_Y179_523	1	complement(1038725..1039381)	KLMA_10344	RHO4	-0.652578	0.0580865	-0.135682	0.558105	0.508501	0.211705	0.325433	0.490432	0.260582	0.482095	-0.233971	0.666823
Kmarxianus_Y179_524	1	1039613..1051789	KLMA_10343	DYN1	0.416318	0.284992	0.14462	0.542349	0.145198	0.596497	-0.151753	0.779516	0.0362008	0.770102	0.639546	0.275593
Kmarxianus_Y179_525	1	1052228..1053448	KLMA_10342	LCB3	-0.195902	0.658485	-0.249212	0.232207	0.284804	0.250111	0.490565	0.197821	0.281392	0.334212	0.681273	0.232007
Kmarxianus_Y179_526	1	complement(1053836..1054084)	_	YJL133C-A	0.123409	0.941772	-1.09155	4.0247e-06	0.199887	0.59717	0.130008	0.801469	-0.170028	0.683407	1.35069	0.0155054
Kmarxianus_Y179_527	1	complement(1054965..1057901)	KLMA_10341	PFK1	0.239078	0.680927	0.298866	0.305595	0.229583	0.425749	-0.172114	0.731424	-0.213116	0.633762	-0.428566	0.584544
Kmarxianus_Y179_528	1	complement(1058897..1060624)	KLMA_10339	YAP1801	0.846126	0.125837	-0.0517752	0.783674	-0.00630584	0.93077	-0.281259	0.493542	-0.097143	0.828287	0.35364	0.529254
Kmarxianus_Y179_529	1	1061469..1062176	_	_	-0.3565	0.47608	0.292451	0.578603	-0.163371	0.688899	-0.125767	0.923679	-0.123193	0.885408	0.0872128	0.915571
Kmarxianus_Y179_530	1	1062292..>1062702	KLMA_10338	FMP43	0.0284378	0.946478	0.599336	0.00870572	-0.412195	0.101748	-0.848905	0.0183639	-0.580284	0.0553869	0.00643	0.939985
Kmarxianus_Y179_531	1	complement(1063113..1064387)	KLMA_10336	LSC2	-0.046256	0.975877	1.09207	0.000213991	-0.142893	0.465779	-0.927162	0.0481032	-0.862915	0.0217012	0.240931	0.685624
Kmarxianus_Y179_532	1	complement(1065523..1067841)	KLMA_10334	SDA1	0.683307	0.0687815	-0.644614	0.00201993	0.746791	0.0075523	0.197552	0.535835	-0.267167	0.416065	-1.36664	0.0192115
Kmarxianus_Y179_533	1	complement(1068470..1070149)	KLMA_10333	TDS4	0.14207	0.605811	0.37545	0.0995798	0.160423	0.48143	0.66522	0.042746	0.484841	0.0849725	0.665483	0.234718
Kmarxianus_Y179_534	1	1070565..1071209	KLMA_10332	CPD1	-0.735917	0.0459382	-0.3004	0.127043	-0.509777	0.0136873	-0.0932911	0.840751	-0.183151	0.614043	0.104035	0.788725
Kmarxianus_Y179_535	1	1071612..1072412	KLMA_10331	SOL3	0.312623	0.409822	-0.21218	0.279278	-0.361381	0.0968913	-0.79869	0.0257055	-0.692624	0.0206621	-0.0887438	0.950566
Kmarxianus_Y179_536	1	1075892..1077349	KLMA_10330	MGA1	1.53035	0.000466578	-0.554931	0.00755981	0.581734	0.00906355	0.912519	0.00644275	0.479856	0.0975305	-0.842245	0.197357
Kmarxianus_Y179_537	1	complement(1078888..1081479)	KLMA_10329	YGR250C	0.500867	0.203845	0.0827824	0.768961	-0.107918	0.635265	-0.534465	0.234592	-0.509261	0.172243	-0.533957	0.54018
Kmarxianus_Y179_538	1	complement(1085706..1090142)	KLMA_10328	DNA2	0.193128	0.559483	-0.329245	0.132086	0.311277	0.242114	0.176172	0.620353	0.348225	0.230453	1.28261	0.0260268
Kmarxianus_Y179_539	1	complement(1090550..1091653)	KLMA_10327	_	-0.0585734	0.949286	-0.210928	0.421565	0.199666	0.54483	0.409002	0.358653	0.275153	0.407091	1.28429	0.0261922
Kmarxianus_Y179_540	1	complement(1091998..1099248)	KLMA_10326	PRP8	0.477184	0.222577	-0.144342	0.453797	-0.00568332	0.893685	0.0858258	0.725728	0.143326	0.562242	0.0519054	0.963995
Kmarxianus_Y179_541	1	complement(1099730..1101628)	KLMA_10325	CDC23	0.094008	0.773874	0.0681167	0.807316	0.204849	0.517817	0.804419	0.0651807	0.73458	0.0425529	1.07011	0.0697913
Kmarxianus_Y179_542	1	1101922..1102713	KLMA_10324	THP2	-0.34433	0.338481	-0.0138696	0.915724	-0.0224688	0.919372	0.395748	0.380125	0.158487	0.676789	0.919351	0.174401
Kmarxianus_Y179_543	1	1102940..1104586	KLMA_10323	MTG2	0.32285	0.357498	0.108184	0.740302	-0.177302	0.423851	-0.0452318	0.908181	-0.0636146	0.874731	-0.210909	0.762787
Kmarxianus_Y179_544	1	1104743..1105288	KLMA_10322	CAF20	-0.00831833	0.949392	0.698427	0.00173531	0.240482	0.396932	1.63643	3.64467e-06	0.866928	0.00281379	0.73278	0.213404
Kmarxianus_Y179_545	1	1105750..1106859	KLMA_10321	DNAJA1	0.300556	0.358963	0.205976	0.44048	0.485426	0.0272959	1.37211	0.000459079	1.4322	5.24104e-05	1.88919	0.00102957
Kmarxianus_Y179_546	1	1107877..1109388	KLMA_10320	GAS3	-0.274188	0.601304	-0.619947	0.0120094	0.461574	0.0286249	0.123004	0.700067	0.04463	0.784968	0.0739679	0.899682
Kmarxianus_Y179_547	1	complement(1111183..1113327)	KLMA_10319	SKY1	0.255397	0.506191	-0.183292	0.378104	-0.0823984	0.655985	-0.304038	0.447602	-0.0771198	0.889293	-0.849184	0.224362
Kmarxianus_Y179_548	1	complement(1114025..1114822)	KLMA_10318	_	0.507402	0.189116	0.207829	0.385244	0.00600574	0.982425	0.254122	0.465154	0.0772319	0.76656	0.0448382	0.903939
Kmarxianus_Y179_549	1	complement(<1114901..1115179)	KLMA_10318	_	0.24808	0.479773	0.293695	0.311991	0.143594	0.738655	0.281263	0.559359	-0.146556	0.803688	-0.465652	0.549808
Kmarxianus_Y179_550	1	1116316..1117890	KLMA_10317	GUA1	0.231576	0.511901	0.146444	0.649426	0.949452	1.21221e-05	0.414732	0.223789	-0.831195	0.00786423	-1.99938	0.001119
Kmarxianus_Y179_551	1	1118324..1119109	KLMA_10316	HEM4	-0.427138	0.262048	-0.052433	0.787751	-0.228259	0.397891	0.232601	0.639547	-0.29853	0.436819	0.638058	0.317484
Kmarxianus_Y179_552	1	complement(1119138..1122341)	KLMA_10315	TRS130	0.354991	0.295296	-0.0302111	0.830966	0.173133	0.523821	0.811934	0.0549136	1.09946	0.00138789	1.57106	0.00791083
Kmarxianus_Y179_553	1	1122555..1127198	KLMA_10314	_	0.488796	0.195737	-0.118354	0.567105	0.00210791	0.967492	-0.323591	0.369652	0.168486	0.479642	0.0369306	0.925331
Kmarxianus_Y179_554	1	1127476..1128825	KLMA_10313	ERG8	-0.0799501	0.859485	-0.18117	0.363372	0.0233819	0.97723	1.19043	0.00143241	0.667281	0.0364691	1.38439	0.0169783
Kmarxianus_Y179_555	1	complement(1128946..1129893)	KLMA_10312	RFM1	-0.283056	0.432005	-0.151214	0.534832	0.354286	0.214432	0.49082	0.240685	0.438881	0.189103	0.604656	0.298072
Kmarxianus_Y179_556	1	complement(1130298..1131836)	KLMA_10311	FMP42	-0.310926	0.461162	-0.275771	0.177574	-0.287622	0.182392	0.201665	0.580872	0.193792	0.498787	0.612102	0.305121
Kmarxianus_Y179_557	1	complement(1132367..1133146)	KLMA_10310	FSH3	-0.335902	0.369441	-0.066429	0.834588	-0.470626	0.054641	-0.529584	0.173431	-0.691135	0.0344038	-0.61485	0.315676
Kmarxianus_Y179_558	1	complement(1133411..1134070)	KLMA_10309	FSH2	-0.0424027	0.838812	0.403648	0.175999	-0.00783126	0.903025	-0.0385643	0.990115	-0.480351	0.200301	0.487646	0.417677
Kmarxianus_Y179_559	1	1134739..1136082	KLMA_10308	UBP8	-0.0543883	0.918177	0.0625265	0.84427	0.161145	0.514675	0.826972	0.0300589	0.591862	0.059708	0.246487	0.656789
Kmarxianus_Y179_560	1	complement(1136149..1136991)	KLMA_10307	PLP2	-0.171132	0.630152	0.0881897	0.733745	0.329661	0.160447	1.10391	0.0028937	0.234451	0.388173	0.41217	0.435758
Kmarxianus_Y179_561	1	complement(1137365..1139425)	KLMA_10306	MRE11	0.443136	0.207142	0.339974	0.113591	0.0418419	0.86336	0.125535	0.666787	0.0529348	0.779649	0.00202312	0.959694
Kmarxianus_Y179_562	1	1139641..1140333	KLMA_10305	YOR283W	-0.275357	0.562024	-0.268417	0.244879	0.296412	0.162434	0.156204	0.615551	-0.0741857	0.844849	0.0862502	0.875096
Kmarxianus_Y179_563	1	1140579..1141016	KLMA_10304	RDL1	-1.47245	2.51352e-05	-1.13542	5.30316e-07	-0.273385	0.175923	-1.0288	0.0156086	-0.811306	0.0198772	-1.58584	0.0144674
Kmarxianus_Y179_564	1	1141432..1141860	KLMA_10303	RDL2	-0.553228	0.0652369	0.144135	0.46845	-0.452982	0.0559235	-0.730894	0.0388107	-0.870576	0.00448216	-1.47182	0.0135814
Kmarxianus_Y179_565	1	complement(1141977..1143014)	KLMA_10302	RRP36	0.621934	0.0716563	-0.189109	0.325478	0.355251	0.228831	0.380535	0.37035	0.117052	0.695434	-0.100753	0.873134
Kmarxianus_Y179_566	1	complement(join(1143406..1143644,1143726..1143783))	KLMA_10301	MRPL44	-0.448809	0.147906	0.305638	0.1977	0.196985	0.566658	-0.612445	0.0818753	-0.303125	0.401692	-1.69094	0.00395958
Kmarxianus_Y179_567	1	1144287..1144802	KLMA_10300	RPB7	-0.562517	0.137548	-0.036403	0.791154	0.342134	0.215939	-0.0943971	0.849795	0.286006	0.358197	0.617124	0.296876
Kmarxianus_Y179_568	1	complement(1145434..1147023)	KLMA_10299	DIT1	0.409662	0.204174	-0.936771	5.74509e-05	-0.890708	2.76275e-05	-0.990815	0.010096	0.653374	0.0236428	1.61383	0.00730596
Kmarxianus_Y179_569	1	1147814..1149358	KLMA_10298	DIT2	-0.238528	0.625378	-0.468719	0.0386542	-1.54188	1.17563e-10	-0.703541	0.071053	-0.454167	0.227995	0.423715	0.488529
Kmarxianus_Y179_570	1	complement(1149524..1150540)	KLMA_10297	URH1	0.244045	0.40034	0.257598	0.292017	-0.219867	0.315892	-0.168742	0.583264	0.107917	0.613182	-1.76776	0.00220989
Kmarxianus_Y179_571	1	1152647..1153675	KLMA_10296	_	-0.0399288	0.913499	-0.407998	0.131846	0.549036	0.00973018	0.816064	0.0242902	0.192768	0.436241	0.211823	0.764427
Kmarxianus_Y179_572	1	1155084..1156508	KLMA_10295	MCH2	-0.11747	0.71469	0.187062	0.482222	0.0831895	0.812448	0.383485	0.305099	-0.645719	0.0345684	-1.86335	0.000952416
Kmarxianus_Y179_573	1	complement(1156636..1157283)	KLMA_10294	HPT1	-0.437594	0.287971	0.966082	0.000979395	0.0624234	0.857417	-0.0794288	0.817069	-1.00868	0.00587996	-2.20082	0.0034708
Kmarxianus_Y179_574	1	complement(1158216..1160096)	KLMA_10293	UTP5	0.423829	0.185594	-0.555063	0.00668722	0.785257	0.00205407	0.623726	0.0602521	0.47627	0.0740164	0.607945	0.328042
Kmarxianus_Y179_575	1	<1161119..>1161574	KLMA_10292	NCB2	-0.371292	0.363587	-0.270399	0.203509	0.0657996	0.77721	0.837518	0.0289131	-0.309159	0.356842	-0.996602	0.14605
Kmarxianus_Y179_576	1	complement(1161896..1164754)	KLMA_10290	SXM1	0.256602	0.4389	-0.0397103	0.778754	0.385755	0.0949349	1.10322	0.00278747	1.29404	2.58744e-05	2.11793	0.00289326
Kmarxianus_Y179_577	1	1165217..1166734	KLMA_10289	SMP3	0.177587	0.561339	-0.112389	0.596152	0.17929	0.401724	0.624582	0.101228	0.342593	0.264478	-0.54941	0.315362
Kmarxianus_Y179_578	1	complement(1166846..1168132)	KLMA_10286	RPT3	-0.210892	0.634731	0.113216	0.723884	-0.0897502	0.629539	-0.00554738	0.994055	0.130371	0.601424	0.497873	0.383079
Kmarxianus_Y179_579	1	complement(1168527..1169768)	KLMA_10285	SHE9	-0.131443	0.756308	0.134634	0.562645	-0.135034	0.593929	-0.644708	0.0681165	-0.0161944	0.919896	0.398069	0.406693
Kmarxianus_Y179_580	1	1169959..1170492	KLMA_10284	SPP2	-0.447823	0.193517	-0.0227189	0.968347	-0.0529658	0.920979	-0.586207	0.175139	-0.492169	0.190885	-1.29148	0.035089
Kmarxianus_Y179_581	1	complement(1170621..1172375)	KLMA_10283	MDM32	-0.0188934	0.909755	-0.170213	0.39399	0.0177171	0.96645	-0.909767	0.0108843	-0.468387	0.144963	-1.77651	0.00700308
Kmarxianus_Y179_582	1	1172963..1173784	KLMA_10282	PNO1	-0.227498	0.557003	-0.461659	0.0200976	0.999221	0.0012789	0.0272601	0.873847	-0.574451	0.062276	-1.49188	0.0076944
Kmarxianus_Y179_583	1	complement(1174260..1174811)	KLMA_10281	PTH1	0.239053	0.633311	0.207605	0.494591	-0.248804	0.483848	-0.947741	0.0501454	-0.102351	0.811975	0.265521	0.702232
Kmarxianus_Y179_584	1	1175125..1176024	KLMA_10280	GTR1	-0.286449	0.41549	0.156397	0.502209	-0.294313	0.2094	-0.337152	0.399974	-0.184449	0.695522	0.413814	0.452385
Kmarxianus_Y179_585	1	complement(1176531..1178087)	KLMA_10279	NDI1	0.072047	0.790872	0.607294	0.0170528	-0.26621	0.161395	-0.807971	0.0755217	-0.196287	0.688157	-0.979363	0.198612
Kmarxianus_Y179_586	1	1179721..1182699	KLMA_10278	DSS1	0.662218	0.0592857	-0.268212	0.197994	0.140019	0.587818	-0.0343108	0.902441	0.198452	0.426692	-0.893936	0.110101
Kmarxianus_Y179_587	1	1183148..1183924	KLMA_10277	YML119W	-0.722758	0.0581503	-0.684506	0.00178889	-0.156846	0.571992	-0.188446	0.647472	0.2205	0.42296	0.498116	0.379305
Kmarxianus_Y179_588	1	complement(1184091..1184345)	KLMA_10276	MRPL33	-0.407267	0.201894	0.183183	0.437692	-0.0409842	0.835176	-0.84865	0.0124007	-0.479763	0.133124	-1.32272	0.0214298
Kmarxianus_Y179_589	1	1184872..1186455	KLMA_10275	NGL2	-0.241673	0.577366	-0.112906	0.550765	-0.344953	0.0729409	-0.0679228	0.818422	-0.225682	0.515679	0.925114	0.104158
Kmarxianus_Y179_590	1	complement(1186484..1188259)	KLMA_10274	KU70	-0.177047	0.646171	0.332438	0.125947	-0.411292	0.0380199	-0.128938	0.683284	-0.0915595	0.852103	0.234131	0.695609
Kmarxianus_Y179_591	1	1188767..1189894	KLMA_10273	PFA4	-0.358344	0.33857	0.139	0.501766	-0.205737	0.399628	0.0719949	0.821504	0.418643	0.195627	1.02985	0.0874528
Kmarxianus_Y179_592	1	complement(1189978..1194447)	KLMA_10272	SIN3	0.522654	0.215582	-0.263368	0.298286	0.151183	0.5557	0.613133	0.0972914	0.654444	0.0321173	1.10262	0.124762
Kmarxianus_Y179_593	1	1195076..1195441	KLMA_10271	RPB11	-0.654956	0.060258	-0.0437297	0.819373	0.0788548	0.826675	-0.0952434	0.840108	-0.105407	0.840668	-0.724514	0.231121
Kmarxianus_Y179_594	1	complement(1196233..1198347)	KLMA_10270	CDC5	0.385434	0.251458	-0.830838	0.000146065	-0.212936	0.284083	-0.611102	0.0753942	-0.384027	0.240704	0.0252506	0.82272
Kmarxianus_Y179_595	1	1200000..1202303	KLMA_10269	TOP1	0.454672	0.164329	-0.230898	0.259025	0.455568	0.0339143	0.483758	0.15169	0.69422	0.0101409	1.0348	0.0768514
Kmarxianus_Y179_596	1	1202924..1203385	KLMA_10268	MIC17	0.613213	0.106539	1.10098	3.49698e-07	-0.170788	0.355523	-0.287636	0.483109	-0.105623	0.775363	-1.22442	0.0739767
Kmarxianus_Y179_597	1	1204210..1204983	KLMA_10267	AIM34	-0.581909	0.161687	-0.502294	0.0247513	-0.127449	0.506221	-1.05735	0.00806148	-0.0777636	0.924621	-0.436032	0.495008
Kmarxianus_Y179_598	1	complement(1205218..1205805)	KLMA_10266	COQ10	-0.715941	0.0314727	0.0784454	0.75127	0.063595	0.870267	1.20216	0.00384162	0.808094	0.0232403	0.94437	0.128138
Kmarxianus_Y179_599	1	1206036..1206938	KLMA_10265	MDM12	-0.215364	0.521918	0.148311	0.534554	0.0300643	0.966129	0.569613	0.208198	0.102307	0.690897	0.538997	0.34991
Kmarxianus_Y179_600	1	1207212..1208756	KLMA_10263	MVP1	-0.284311	0.509243	-0.187772	0.365139	-0.327192	0.120168	-0.217488	0.555371	-0.410025	0.207521	-0.0712704	0.947683
Kmarxianus_Y179_601	1	complement(1208885..1209982)	KLMA_10262	RCL1	0.112355	0.621986	-0.51588	0.0102269	0.859189	0.00285714	1.2143	0.00142555	0.776593	0.00953441	1.10124	0.0569145
Kmarxianus_Y179_602	1	1210633..1211715	KLMA_10261	TAF4	-0.0945557	0.849641	-0.0637581	0.725112	-0.0657161	0.748776	0.0266576	0.89209	0.153138	0.571421	0.501609	0.368579
Kmarxianus_Y179_603	1	complement(1212217..1214169)	KLMA_10260	PLB1	0.248857	0.492669	-0.119802	0.580911	-0.240062	0.338746	-0.118147	0.80845	-0.846849	0.0459137	-1.12603	0.254377
Kmarxianus_Y179_604	1	1215646..1216044	KLMA_10259	HTZ1	-0.380621	0.332491	-0.13552	0.490037	0.285132	0.280614	0.0275477	0.919556	-0.348692	0.29614	-0.985901	0.1058
Kmarxianus_Y179_605	1	complement(1216356..1216847)	KLMA_10258	_	-0.487268	0.0870589	-0.123202	0.62804	-0.403347	0.11809	-0.734088	0.0399923	-0.214399	0.536528	-1.62191	0.00652917
Kmarxianus_Y179_606	1	1217228..1218862	KLMA_10257	HRD1	-0.377868	0.334382	0.136562	0.597604	-0.00373908	0.911549	0.224661	0.528304	0.142395	0.547271	-0.648142	0.314129
Kmarxianus_Y179_607	1	complement(1218990..1220435)	KLMA_10256	RRN11	0.917784	0.00907234	0.191718	0.574879	0.18131	0.637215	1.72275	0.000403221	0.606102	0.105574	0.958625	0.159321
Kmarxianus_Y179_608	1	1221293..1221673	KLMA_10255	SOH1	-0.291619	0.312025	0.188216	0.439853	0.0111306	0.986145	-0.0926104	0.849491	0.265058	0.43006	0.549303	0.349471
Kmarxianus_Y179_609	1	1223197..1226724	KLMA_10253	PYC2	0.830221	0.0592435	0.479266	0.1053	0.209431	0.43497	-0.395203	0.450564	0.0781235	0.79386	-0.953996	0.34894
Kmarxianus_Y179_610	1	complement(1226910..1227521)	KLMA_10252	DUO1	-0.373635	0.251666	0.0528087	0.838713	-0.178858	0.417484	-0.0188507	0.948132	0.0803074	0.714872	0.533108	0.308975
Kmarxianus_Y179_611	1	complement(1227777..1228364)	KLMA_10251	ATG12	-0.258493	0.533005	0.0221939	0.981892	-0.188861	0.472548	-0.360779	0.350503	-0.450762	0.226965	-0.122116	0.947789
Kmarxianus_Y179_612	1	1228636..1230750	KLMA_10250	YBP1	0.0467409	0.841021	0.0856566	0.747067	-0.220316	0.279013	-0.266112	0.464433	-0.0280486	0.986061	-0.0582269	0.951899
Kmarxianus_Y179_613	1	complement(<1230861..>1231463)	KLMA_10249	HPC2	0.0420337	0.846216	0.0598776	0.890081	-0.0196107	0.861975	0.482595	0.152124	0.375861	0.148965	1.16844	0.0414666
Kmarxianus_Y179_614	1	1232975..1234384	KLMA_10248	PKP2	_	_	_	_	_	_	_	_	_	_	_	_
Kmarxianus_Y179_615	1	1232975..1234384	KLMA_10248	PKP2	_	_	_	_	_	_	_	_	_	_	_	_
Kmarxianus_Y179_616	1	1235035..1235532	KLMA_10247	UBC2	-0.259631	0.483344	-0.352953	0.108644	-0.109041	0.592449	0.0433029	0.881756	-0.174479	0.616828	0.182303	0.681743
Kmarxianus_Y179_617	1	complement(1235796..1236350)	KLMA_10246	_	-0.340588	0.377776	-1.10499	0.000342151	0.460902	0.225108	0.579932	0.181412	0.196859	0.520103	0.891382	0.138059
Kmarxianus_Y179_618	1	complement(1236874..1238406)	KLMA_10245	SDS23	0.757531	0.114949	-0.346741	0.0969893	0.236126	0.303057	0.488306	0.163707	0.621375	0.0324702	0.682302	0.255476
Kmarxianus_Y179_619	1	1240356..1241789	KLMA_10244	OLE1	-0.0121762	0.91787	-0.637361	0.0166079	0.569415	0.0147202	-0.59764	0.259104	-0.131933	0.818074	-0.492857	0.623759
Kmarxianus_Y179_620	1	complement(1242355..1243185)	KLMA_10243	MET8	-0.666732	0.0673457	-0.352268	0.110216	-0.258359	0.219378	0.674042	0.087702	0.0886562	0.706056	0.124581	0.808158
Kmarxianus_Y179_621	1	complement(1243690..1245582)	KLMA_10242	NGR1	1.32796	0.00385751	0.78547	0.0265766	0.338679	0.301593	0.127734	0.75132	-0.0954415	0.849456	-0.489752	0.414738
Kmarxianus_Y179_622	1	1248179..1249039	KLMA_10241	AME1	-0.139776	0.689046	-0.106566	0.645523	0.018595	0.9469	-0.0886425	0.830143	-0.37415	0.26858	-0.723403	0.231373
Kmarxianus_Y179_623	1	complement(1249459..1249866)	KLMA_10240	ERV14	-0.515077	0.190156	-0.0956463	0.607233	-0.166253	0.350962	0.153929	0.644717	-0.104292	0.846959	-0.579557	0.353703
Kmarxianus_Y179_624	1	1250564..1251241	KLMA_10239	_	-0.914447	0.234518	0.336584	1	-0.162941	0.898353	1.06305	0.329269	-0.353026	0.54269	-0.644483	0.343429
Kmarxianus_Y179_625	1	complement(1251871..1252548)	KLMA_10238	_	-0.530433	0.181347	0.360826	0.200808	-0.00566987	0.958817	-0.263214	0.493967	-0.173611	0.573141	0.885821	0.110659
Kmarxianus_Y179_626	1	complement(1253022..1253747)	KLMA_10237	HRI1	-1.04882	0.0237497	-0.390939	0.158655	0.0617153	0.839842	-0.894271	0.0395438	-0.804259	0.0259105	-0.135177	0.867067
Kmarxianus_Y179_627	1	complement(1254221..1259113)	KLMA_10236	ULS1	0.0731146	0.768807	0.230911	0.338431	0.399022	0.0680979	0.3539	0.234685	0.301016	0.259186	0.348956	0.553879
Kmarxianus_Y179_628	1	complement(1259575..1260186)	KLMA_10235	WWM1	-0.352834	0.324383	0.216303	0.434823	-0.0431128	0.852471	0.0720385	0.852849	-0.142165	0.770375	-1.11631	0.275747
Kmarxianus_Y179_629	1	complement(1261348..1262643)	KLMA_10234	EXG1	0.63027	0.0962691	-0.506237	0.0152982	0.561667	0.0107076	-0.024407	0.907636	-0.362962	0.419631	-1.14235	0.150555
Kmarxianus_Y179_630	1	complement(1264688..1265215)	KLMA_10233	_	0.127531	0.619074	-0.189757	0.33315	0.408626	0.154809	0.576981	0.0845558	-0.327706	0.300613	-0.982522	0.0868195
Kmarxianus_Y179_631	1	complement(1266192..1270043)	KLMA_10232	MSB1	0.660679	0.103164	0.249453	0.275863	-0.135791	0.492275	-0.204327	0.586314	-0.465481	0.15705	-0.769175	0.270042
Kmarxianus_Y179_632	1	complement(1270442..1272256)	KLMA_10231	ECM38	-0.0679337	0.908628	-0.0609471	0.756123	-0.244581	0.352495	-0.0257547	0.857643	-0.169751	0.716652	-0.452931	0.440783
Kmarxianus_Y179_633	1	complement(1272712..1274004)	KLMA_50136	TUF1	-0.270649	0.43978	0.290849	0.252645	-0.0420819	0.747282	-0.88884	0.0439247	-0.549571	0.144874	-1.60782	0.0427288
Kmarxianus_Y179_634	1	1274552..1275151	KLMA_10228	YHC1	-0.240022	0.514008	-0.00929717	0.947202	-0.129011	0.650789	-0.646683	0.0601005	-0.610275	0.0435832	-1.60346	0.00670425
Kmarxianus_Y179_635	1	1275286..1275699	KLMA_10227	ATP14	-0.35767	0.27942	0.737601	0.00329001	-0.431925	0.0427628	-0.555319	0.226727	-0.207533	0.631815	-1.77459	0.0153899
Kmarxianus_Y179_636	1	1276022..1276822	KLMA_10226	_	0.0989537	0.787451	0.343783	0.140705	-0.155239	0.535838	-0.183074	0.63741	-0.341143	0.383193	-0.407381	0.543261
Kmarxianus_Y179_637	1	1277261..1277905	KLMA_50134	GSP1	-0.425641	0.363504	0.123488	0.71429	0.293651	0.257298	0.691759	0.122106	0.17808	0.549237	-0.106766	0.90892
Kmarxianus_Y179_638	1	1278914..1279984	KLMA_10224	GCD7	-0.528307	0.158019	0.0825927	0.765187	0.213778	0.496217	-0.260536	0.547609	-0.455599	0.198381	0.378468	0.478635
Kmarxianus_Y179_639	1	complement(1280538..1281179)	KLMA_10223	PET18	-0.830127	0.027018	-0.580411	0.0461136	-0.299309	0.362155	-0.537923	0.263249	-0.607842	0.172404	-0.420337	0.571176
Kmarxianus_Y179_640	1	complement(1281472..1283367)	KLMA_10222	GUF1	0.062279	0.868175	0.199217	0.373741	-0.0321121	0.836489	-0.625406	0.0616246	-0.212161	0.589092	-0.625328	0.282455
Kmarxianus_Y179_641	1	1283601..1284803	KLMA_10221	MEC3	-0.0601771	0.889533	0.186949	0.43626	-0.263602	0.336778	-0.13205	0.813119	0.302691	0.388639	0.758828	0.246711
Kmarxianus_Y179_642	1	complement(1284812..1285990)	KLMA_10220	SER1	0.0137157	0.995282	0.472496	0.107553	-0.145654	0.423969	-0.396152	0.278104	-0.216083	0.565091	0.0268717	0.951012
Kmarxianus_Y179_643	1	join(1286686..1286688,1287200..1287388)	_	RPS30A	-0.960968	0.0434776	0.244317	0.436249	0.347387	0.194226	0.578156	0.207202	-0.250552	0.553033	-2.31676	0.00687755
Kmarxianus_Y179_644	1	1287771..1288826	KLMA_10218	YLR287C	-0.119924	0.792252	-0.0494764	0.814821	0.467362	0.103571	0.579872	0.159217	0.0992605	0.663219	0.0640705	0.997199
Kmarxianus_Y179_645	1	complement(1288937..1291165)	KLMA_10217	LAS17	0.747493	0.0775527	-0.231588	0.231892	0.333329	0.124718	0.488178	0.13473	0.819721	0.00317996	0.846156	0.136479
Kmarxianus_Y179_646	1	1292543..1294201	KLMA_10216	CTS1	0.735346	0.0956611	0.16517	0.502123	-0.0804055	0.630195	-0.0312516	0.942298	1.18787	2.36381e-05	0.278281	0.624164
Kmarxianus_Y179_647	1	complement(1294698..1295510)	KLMA_10215	NNT1	-0.323424	0.36281	0.0870392	0.819469	0.726225	0.0426774	-0.281925	0.437905	-0.523288	0.111707	-0.763857	0.165726
Kmarxianus_Y179_648	1	1296051..1296893	KLMA_10214	ECI1	-0.109311	0.887352	0.315995	0.36024	-0.461295	0.122961	-0.864324	0.0232257	-0.510384	0.149784	-0.941343	0.131656
Kmarxianus_Y179_649	1	complement(1296900..>1297781)	KLMA_10213	YLR283W	-0.422216	0.19725	0.437144	0.109541	-0.311281	0.231554	-0.835098	0.0181623	-0.664603	0.0376635	-1.13919	0.0589366
Kmarxianus_Y179_650	1	1298001..1298537	KLMA_10212	YLR281C	-0.523304	0.131768	0.118501	0.665001	-0.420306	0.0812542	-0.409304	0.28711	-0.35382	0.312089	-1.27185	0.0350522
Kmarxianus_Y179_651	1	1299112..1302801	KLMA_10211	YLR278C	0.301358	0.435912	-0.131058	0.498705	0.0198992	0.950058	0.0396374	0.898378	0.274972	0.308958	-0.473391	0.472751
Kmarxianus_Y179_652	1	1303440..1305743	KLMA_10210	YSH1	-0.120162	0.816939	-0.133365	0.497217	0.0110617	0.989641	0.2893	0.410081	0.353308	0.195954	0.769267	0.220329
Kmarxianus_Y179_653	1	1306266..1308044	KLMA_10209	DBP9	0.547749	0.102666	-0.551929	0.00670899	0.693887	0.00650106	0.77706	0.0232031	-0.111679	0.771856	-0.697622	0.191483
Kmarxianus_Y179_654	1	complement(1308108..1309805)	KLMA_10208	PEX8	-0.171593	0.715583	-0.0467661	0.774078	-0.118792	0.558238	0.289224	0.455077	0.0825441	0.751193	0.499719	0.395538
Kmarxianus_Y179_655	1	1310084..1310920	KLMA_10207	DSC2	-0.623627	0.0671842	-0.341217	0.18661	-0.19288	0.478834	-0.495067	0.225373	-0.829026	0.026852	-0.88399	0.145043
Kmarxianus_Y179_656	1	complement(1310983..1311585)	KLMA_10206	PAC10	-0.355685	0.306218	-0.00539565	0.954121	-0.181446	0.403549	0.308354	0.442076	-0.0110625	0.927505	0.796898	0.168421
Kmarxianus_Y179_657	1	1311846..1315616	KLMA_10204	YOL075C	0.282317	0.424306	0.0935562	0.691821	-0.0751055	0.665765	0.129674	0.679907	0.788399	0.00499821	1.01562	0.0830297
Kmarxianus_Y179_658	1	complement(1315823..1317229)	_	YBR138C	-0.0898799	0.876133	-0.20294	0.326942	0.13371	0.556303	0.0486553	0.843329	0.165571	0.528918	0.271313	0.620574
Kmarxianus_Y179_659	1	<1318097..1318177	KLMA_10203	YDL012C	-0.7588	0.0218319	0.266483	0.309614	0.0638174	0.899437	0.145793	0.679569	-0.264323	0.431998	-0.940419	0.115599
Kmarxianus_Y179_660	1	complement(1318338..1319453)	KLMA_10202	_	-0.179505	0.654669	0.161929	0.504203	-0.232935	0.210553	-0.195792	0.554074	-0.803561	0.0087458	-1.326	0.025509
Kmarxianus_Y179_661	1	complement(1319809..1321647)	KLMA_10201	SLX5	0.522463	0.123531	0.0723105	0.807459	0.0553794	0.838622	-0.280185	0.450044	-0.157142	0.653496	-0.811864	0.192483
Kmarxianus_Y179_662	1	complement(1322290..>1323015)	KLMA_10199	NOP1	-0.110026	0.831321	0.360724	0.171275	0.959431	1.74015e-05	0.774467	0.022818	-0.0733207	0.890241	-1.06928	0.0439108
Kmarxianus_Y179_663	1	complement(<1324423..1327184)	KLMA_10197	FLO5	-0.221941	0.522016	-1.76874	3.78402e-16	-1.53212	1.06686e-11	-1.60755	7.96691e-06	-0.946738	0.00151652	-1.48772	0.010779
Kmarxianus_Y179_664	1	1329941..1330975	KLMA_10196	TSC13	-0.507358	0.203617	0.0939781	0.729477	0.112743	0.666969	-0.19181	0.588347	-0.388204	0.218432	0.524936	0.332432
Kmarxianus_Y179_665	1	complement(1331150..1332589)	KLMA_10195	CDC7	0.0871052	0.806375	0.233895	0.351053	0.0430038	0.951187	0.516591	0.235807	0.238064	0.437428	0.143058	0.76008
Kmarxianus_Y179_666	1	1332885..1333514	KLMA_10194	ERP3	-0.576304	0.160962	0.45672	0.165983	-0.329599	0.334756	-0.483784	0.371216	-0.312252	0.5867	-0.133209	0.837878
Kmarxianus_Y179_667	1	complement(1333594..1335192)	KLMA_10192	DAL1	-0.238192	0.542719	1.19687	1.09773e-05	-0.19987	0.459502	0.474924	0.307324	0.517892	0.184374	0.982457	0.130104
Kmarxianus_Y179_668	1	complement(1335825..1338491)	KLMA_10191	KAP104	0.560424	0.12822	-0.000837301	0.945717	0.362931	0.09568	1.01887	0.00366282	0.833902	0.00433813	1.3241	0.0259817
Kmarxianus_Y179_669	1	complement(1338833..1340992)	KLMA_10190	BUD14	0.626627	0.081218	0.251002	0.279452	0.32257	0.189263	0.570343	0.0904808	0.15692	0.499213	0.682947	0.217991
Kmarxianus_Y179_670	1	1342673..1343590	KLMA_10189	ADE1	-0.259555	0.562068	0.058794	0.893571	0.321379	0.136607	-0.229004	0.537669	-0.689676	0.0217262	-0.254902	0.711517
Kmarxianus_Y179_671	1	complement(1343676..1344887)	KLMA_10188	KIN3	-0.311033	0.443542	0.312541	0.193589	-0.447691	0.0328464	0.350805	0.319634	0.639137	0.0215906	1.20846	0.0287905
Kmarxianus_Y179_672	1	complement(1345091..1347598)	KLMA_10187	CDC15	0.320005	0.339763	0.809468	0.000549181	-0.103378	0.577865	-0.283407	0.440807	0.274186	0.307867	0.341294	0.518943
Kmarxianus_Y179_673	1	1347865..1349961	KLMA_10186	YAT1	0.177082	0.646007	0.487652	0.120686	-0.491186	0.0254289	-0.596165	0.206964	-0.144649	0.763127	-0.697537	0.38459
Kmarxianus_Y179_674	1	1350532..1354221	KLMA_10185	OSH2	0.273078	0.504467	-0.186498	0.438696	0.032433	0.929533	-0.324174	0.456909	-0.690124	0.0612622	-0.477366	0.58492
Kmarxianus_Y179_675	1	complement(1354411..1355640)	KLMA_10184	och1	-0.243497	0.53431	0.0948509	0.674603	-0.137698	0.473679	0.159868	0.690307	0.187548	0.428012	-0.402711	0.494527
Kmarxianus_Y179_676	1	1357030..1358886	KLMA_10183	RPN4	0.507338	0.203519	-0.181329	0.451747	0.508391	0.0273872	0.557858	0.211622	0.84862	0.0220797	0.61879	0.49029
Kmarxianus_Y179_677	1	complement(1359213..1360076)	KLMA_10182	GPM3	-0.562845	0.185749	-0.0645344	0.770681	0.369213	0.111246	0.92459	0.00687206	0.172096	0.466542	-0.193256	0.750485
Kmarxianus_Y179_678	1	complement(1360483..1362495)	KLMA_10181	YOL057W	0.0804777	0.770689	0.0413827	0.956996	-0.137462	0.453205	-0.127332	0.737893	0.0236605	0.853447	0.521386	0.385937
Kmarxianus_Y179_679	1	complement(1363585..1364847)	KLMA_10180	ARG1	1.97626	2.79585e-06	1.12978	1.65431e-05	0.210477	0.442666	-0.23819	0.621837	0.273162	0.430611	0.575742	0.519573
Kmarxianus_Y179_680	1	complement(1366439..1367743)	KLMA_10179	GPD1	0.256931	0.531838	0.702507	0.0189563	0.0660994	1	-0.680184	0.152488	-0.375701	0.311704	-1.16049	0.149828
Kmarxianus_Y179_681	1	1370285..1372510	KLMA_10178	MAM3	0.742059	0.0640272	-0.00389401	0.986213	-0.242154	0.198369	-0.424109	0.223652	-0.532596	0.105499	-0.883597	0.138303
Kmarxianus_Y179_682	1	1373118..1374980	KLMA_10177	RTK1	0.179446	0.605498	0.122972	0.619607	-0.469467	0.0343232	-0.488619	0.284754	-0.181802	0.640554	-0.0768304	0.932524
Kmarxianus_Y179_683	1	complement(1375229..1376710)	KLMA_10176	PRS5	-0.431356	0.341968	-0.25471	0.23937	0.167187	0.467246	-0.364524	0.344544	-0.472265	0.165658	-0.82193	0.182648
Kmarxianus_Y179_684	1	1377405..1378850	KLMA_10175	APM4	-0.106094	0.881379	0.0352039	0.972269	-0.0215232	0.866529	-0.350077	0.36673	-0.0888292	0.852351	0.00912442	0.934556
Kmarxianus_Y179_685	1	1379297..1380430	KLMA_10174	_	-0.232939	0.464031	0.46009	0.0801064	-0.443537	0.0338268	-0.940494	0.0114929	-0.848148	0.00769252	-1.86147	0.00395942
Kmarxianus_Y179_686	1	1380835..1382010	KLMA_10173	ARP2	-0.545671	0.186794	0.112639	0.742627	-0.0652516	0.716016	-0.00638294	0.989293	0.0794899	0.710137	0.366651	0.507792
Kmarxianus_Y179_687	1	complement(1382189..1384606)	KLMA_10172	MPS1	0.169944	0.555748	-0.262367	0.200236	0.158672	0.484259	0.407139	0.243856	0.584719	0.0279996	0.925604	0.104909
Kmarxianus_Y179_688	1	complement(1384924..1387320)	KLMA_10171	CRT10	0.200371	0.545279	0.0871296	0.740567	-0.077944	0.646994	0.722132	0.049167	0.11191	0.658201	0.562015	0.301582
Kmarxianus_Y179_689	1	complement(1387658..1389541)	KLMA_10170	IMH1	0.723134	0.0794703	0.676255	0.11416	-0.00158768	0.889472	2.54325	3.1527e-10	1.62057	2.36527e-06	2.15513	0.000211099
Kmarxianus_Y179_690	1	complement(1389955..1390875)	KLMA_10169	YPQ1	-0.318817	0.461691	0.0585023	0.855161	0.377223	0.279503	-0.602128	0.172749	-0.284906	0.486856	-0.18582	0.83444
Kmarxianus_Y179_691	1	complement(1391344..1392300)	KLMA_10168	TRM10	-0.122648	0.715568	0.173746	0.428428	0.208429	0.420544	0.380065	0.302913	0.244511	0.376195	0.298355	0.598937
Kmarxianus_Y179_692	1	1392700..1393665	KLMA_10167	RFC4	-0.437945	0.201774	0.0955805	0.723942	0.171762	0.567822	0.296492	0.455051	0.28253	0.337236	1.39948	0.0255509
Kmarxianus_Y179_693	1	1393962..1395743	KLMA_10166	VPS52	-0.229318	0.535227	-0.115221	0.566605	0.200999	0.432597	0.491647	0.197906	0.202356	0.432164	1.08981	0.05302
Kmarxianus_Y179_694	1	1395975..1398095	KLMA_10165	HMI1	0.242475	0.468116	-0.0855639	0.719576	-0.155188	0.536919	-0.548082	0.198338	-0.20449	0.70313	0.227166	0.701992
Kmarxianus_Y179_695	1	complement(1398108..1400255)	KLMA_10164	VPS72	0.332203	0.325516	-0.0262497	0.894024	-0.0532465	0.766304	0.247709	0.451705	0.237168	0.345992	0.553422	0.321118
Kmarxianus_Y179_696	1	1400519..1401502	KLMA_10163	COQ3	-0.29488	0.434488	0.0821988	0.768855	-0.204767	0.36155	-0.700373	0.0544734	-0.434149	0.230123	0.162846	0.759203
Kmarxianus_Y179_697	1	complement(1401663..1402340)	KLMA_10162	VPS60	-0.577255	0.0761891	-0.0906812	0.636777	-0.586332	0.0122847	-0.871459	0.0132154	-0.620115	0.0391209	-1.17485	0.0502608
Kmarxianus_Y179_698	1	complement(1402802..1404385)	KLMA_10161	CDC6	-0.0305708	0.944281	-0.357999	0.0913301	0.0812644	0.887679	0.411758	0.398117	0.34033	0.260937	1.05289	0.059981
Kmarxianus_Y179_699	1	1405879..1410354	KLMA_10160	SNT1	0.889809	0.0484353	-0.0551272	0.767132	0.146204	0.534415	-0.0772875	0.906435	0.0370216	0.836224	-0.307554	0.701526
Kmarxianus_Y179_700	1	1410958..1412019	KLMA_10159	FEN1	-0.328287	0.514223	-0.484901	0.0544681	0.590341	0.0063362	1.78082	4.02326e-07	0.713348	0.0185526	0.71055	0.228943
Kmarxianus_Y179_701	1	complement(1412312..1413604)	KLMA_10158	RRP43	-0.204056	0.657507	-0.16228	0.418496	0.639443	0.0346056	-0.139543	0.672167	-0.519589	0.107507	-1.00177	0.0739085
Kmarxianus_Y179_702	1	1414033..1415040	KLMA_10157	RBK1	-0.63538	0.0799648	0.00144459	0.93822	-0.0752988	0.674568	-0.302145	0.407764	-0.491234	0.151232	-0.315702	0.649399
Kmarxianus_Y179_703	1	complement(1415164..1418895)	KLMA_10156	UBP12	0.397816	0.272149	-0.819568	8.93047e-05	0.0135911	0.987934	-0.385985	0.293332	0.06285	0.75479	0.446711	0.373093
Kmarxianus_Y179_704	1	complement(1419303..1422059)	KLMA_10155	PHO87	0.93658	0.0211945	0.291363	0.306707	0.292119	0.231171	0.416854	0.209589	-0.154969	0.663581	-1.43318	0.0558377
Kmarxianus_Y179_705	1	1423584..1425977	KLMA_10153	ACO2a	0.869968	0.0155142	-0.557014	0.00686841	0.325067	0.166946	-0.0304349	0.891667	0.574369	0.0330989	1.2037	0.0388227
Kmarxianus_Y179_706	1	complement(1426260..1430357)	KLMA_10152	BUD5	0.765614	0.0442986	-0.12356	0.504632	0.257617	0.253783	1.13913	0.000832202	0.864275	0.00175412	1.37586	0.0156852
Kmarxianus_Y179_707	1	complement(1430673..1432400)	KLMA_10151	ECM25	0.107806	0.675666	-0.128871	0.525131	-0.0707911	0.720143	0.188815	0.645105	0.540129	0.0771939	1.35961	0.0175648
Kmarxianus_Y179_708	1	complement(1433250..1434359)	KLMA_10150	_	-0.102348	0.794226	0.190723	0.394602	-0.000117082	0.970481	0.061317	0.854412	-0.0577446	0.951678	-0.0391008	0.936953
Kmarxianus_Y179_709	1	1434592..1436943	KLMA_10149	RCY1	0.204609	0.481839	-0.0193829	0.912708	-0.338371	0.0772045	0.258365	0.483193	0.257348	0.374724	0.0673263	0.935752
Kmarxianus_Y179_710	1	complement(1436996..1437997)	KLMA_10148	_	0.35235	0.339402	0.281082	0.264177	-0.312952	0.117325	-0.509158	0.155418	-0.222978	0.541933	-0.691765	0.257816
Kmarxianus_Y179_711	1	complement(1438187..1438582)	KLMA_10147	_	-0.459848	0.180067	0.0212377	0.934791	0.155888	0.712475	0.397774	0.400481	0.0443836	0.850671	0.314742	0.709516
Kmarxianus_Y179_712	1	1438827..>1439078	_	NCE101	-0.960291	0.00544982	0.549903	0.0554317	-0.329245	0.349141	-0.172132	0.717624	0.0296868	0.932231	-1.85278	0.00944802
Kmarxianus_Y179_713	1	complement(1439211..1441754)	KLMA_10146	SIP4	0.149798	0.676933	-0.0371903	0.849911	-0.0834125	0.62541	-0.0206911	0.951256	-0.0779057	0.921498	0.457058	0.421403
Kmarxianus_Y179_714	1	1445124..1447100	KLMA_10145	YJL206C	0.152088	0.629486	0.106161	0.688032	0.0465504	0.904529	0.503225	0.157257	0.469508	0.0757282	0.347359	0.555842
Kmarxianus_Y179_715	1	1447371..1451489	KLMA_10144	LAA1	0.385917	0.324435	0.11399	0.736785	0.2468	0.336138	-0.358515	0.354472	0.438984	0.106662	0.600476	0.314727
Kmarxianus_Y179_716	1	complement(1451637..1452305)	KLMA_30021	MATA2	-0.158535	1	-1.03794	0.145811	_	_	0.3232	1	_	_	-1.00748	0.251765
Kmarxianus_Y179_717	1	1453171..1453812	KLMA_30022	MATA1	_	_	_	_	_	_	-1.10839	0.200124	0.511499	1	_	_
Kmarxianus_Y179_718	1	complement(<1453835..1455965)	KLMA_10141	SLA2	0.40103	0.300432	0.212562	0.447205	-0.181886	0.385964	-0.614984	0.103779	-0.38118	0.243852	-0.215631	0.71657
Kmarxianus_Y179_719	1	1456931..1457257	KLMA_10140	SUI1	-0.584836	0.153277	-0.03957	0.847131	0.27565	0.285988	0.999977	0.0271698	-0.121992	0.763308	-1.4641	0.0449578
Kmarxianus_Y179_720	1	1457629..1458180	KLMA_10139	CWC25	0.074709	0.799476	0.0810204	0.763876	-0.17961	0.533088	-0.501475	0.216043	-0.470403	0.143631	-1.27267	0.0362696
Kmarxianus_Y179_721	1	complement(1458191..1458958)	KLMA_10138	VPS75	-0.346749	0.332204	-0.0478261	0.762707	0.127221	0.647164	-0.0236999	0.941535	-0.510866	0.109501	-0.885049	0.126496
Kmarxianus_Y179_722	1	complement(1459430..1461730)	KLMA_10137	YNL247W	0.00745901	0.889172	-0.0811764	0.671606	0.39464	0.0774235	0.0969476	0.727327	0.219192	0.363772	1.00683	0.0801746
Kmarxianus_Y179_723	1	1462167..1464095	KLMA_10136	YJR098C	-0.386184	0.343493	0.130453	0.57956	-0.153912	0.440654	-0.461071	0.160491	-0.0766539	0.864809	0.0284157	0.934445
Kmarxianus_Y179_724	1	complement(1464210..1464692)	KLMA_10135	JJJ3	-0.361864	0.282407	-0.0175769	0.966432	-0.256315	0.422555	-0.152302	0.581948	-0.368637	0.342838	-1.45755	0.0148094
Kmarxianus_Y179_725	1	1465182..1466420	KLMA_10134	RPA49	-0.265052	0.531779	-0.289542	0.180994	0.795175	0.00145964	0.0378911	0.909267	-0.442876	0.153064	-1.09535	0.0495204
Kmarxianus_Y179_726	1	1466627..1468177	KLMA_10133	MPA43	-0.119382	0.834788	-0.00133231	0.943638	-0.160555	0.361875	0.404393	0.268737	0.522729	0.0767038	0.714056	0.21029
Kmarxianus_Y179_727	1	complement(1468208..1472098)	KLMA_10132	RAD50	0.197488	0.523805	0.122045	0.585141	-0.26168	0.189139	0.189088	0.5797	0.387749	0.157869	0.229386	0.673535
Kmarxianus_Y179_728	1	1472748..1474571	KLMA_10131	NRD1	0.8866	0.0350766	0.159177	0.532401	-0.0847777	0.691521	0.651698	0.0674453	0.509238	0.0738801	0.770939	0.220138
Kmarxianus_Y179_729	1	1474877..1475668	KLMA_10130	MRPL17	-0.23213	0.446132	0.247519	0.277365	0.0442887	0.913093	-0.817096	0.0244587	-0.0269275	0.951447	-0.620651	0.305523
Kmarxianus_Y179_730	1	complement(1475867..1477186)	KLMA_10129	TEX1	-0.229727	0.567307	0.00613077	0.977807	-0.152043	0.45533	0.0315233	0.927626	-0.254371	0.549852	0.355501	0.57919
Kmarxianus_Y179_731	1	1477883..1478989	KLMA_10128	RTC4	-0.0454932	0.989765	0.21861	0.449083	-0.344467	0.208004	-0.822276	0.0387016	-0.634937	0.0520902	-0.985417	0.105246
Kmarxianus_Y179_732	1	1479275..1479748	KLMA_10127	GIS2	-0.755015	0.0780746	0.20195	0.534197	0.236949	0.330293	-0.32464	0.472065	-0.433152	0.271798	-1.56941	0.0292324
Kmarxianus_Y179_733	1	complement(1480008..1482401)	KLMA_10126	FOL1	0.623777	0.104499	-0.0481263	0.784448	0.510992	0.0178614	0.884684	0.00975065	0.690218	0.0109334	1.18788	0.037305
Kmarxianus_Y179_734	1	1483307..1484728	KLMA_10125	COQ6	-0.398117	0.311174	-0.219152	0.29454	-0.11471	0.518232	-0.330156	0.351456	-0.173907	0.616452	0.231322	0.648786
Kmarxianus_Y179_735	1	1484973..1486157	KLMA_10124	TGL2	-0.231193	0.571422	-0.0620001	0.696082	-0.418909	0.0434639	-0.562029	0.097122	-0.426439	0.175813	-0.186933	0.78109
Kmarxianus_Y179_736	1	1486464..1490021	KLMA_10123	SIP3	0.396945	0.288346	0.0563692	0.862814	0.114678	0.664921	0.896298	0.0218811	0.810728	0.00747065	1.37241	0.0426994
Kmarxianus_Y179_737	1	1490788..1492830	KLMA_10122	DSL1	-0.101082	0.867603	0.22972	0.330324	-0.0330118	0.835448	0.0382092	0.94154	-0.0441921	0.994275	0.470796	0.421771
Kmarxianus_Y179_738	1	1493233..1493451	KLMA_10121	ATX1	-1.06797	0.00370202	-0.0629114	0.66422	-0.331391	0.140639	-0.117654	0.790967	-0.853168	0.0193415	-1.29664	0.0535486
Kmarxianus_Y179_739	1	1493735..1494232	KLMA_10120	LTO1	-0.809839	0.0153392	0.180139	0.538999	-0.284115	0.304548	0.102795	0.825164	-0.327319	0.38489	-0.228438	0.619372
Kmarxianus_Y179_740	1	complement(1494311..1495258)	KLMA_10119	LIN1	-0.375953	0.291729	-0.0499302	0.75743	-0.00984379	0.91341	0.136728	0.689172	0.0130606	0.843496	0.15219	0.818345
Kmarxianus_Y179_741	1	complement(1495498..1496922)	KLMA_10118	ORC5	-0.166094	0.664858	-0.0328404	0.851039	-0.085329	0.621671	0.228358	0.572225	-0.0640157	0.962963	-0.139738	0.770453
Kmarxianus_Y179_742	1	complement(1497138..1503695)	KLMA_10117	POL2	0.318288	0.370068	-0.259359	0.19068	-0.199186	0.337916	-0.220452	0.544782	-0.393483	0.263754	0.726863	0.187838
Kmarxianus_Y179_743	1	1504166..1505056	KLMA_10116	YIF1	-0.234586	0.53544	0.0175877	0.996097	0.149621	0.56156	0.420572	0.222611	0.418718	0.147782	1.13546	0.0404213
Kmarxianus_Y179_744	1	1505302..1506117	KLMA_10115	CWC23	-0.6352	0.0734085	0.0603878	0.896252	-0.028487	0.926809	-0.468336	0.238284	-0.629403	0.105284	-0.5039	0.457841
Kmarxianus_Y179_745	1	1506347..1507360	KLMA_10114	PDR17	-0.863167	0.0207354	-0.325218	0.125325	-0.0208177	0.921145	-0.581222	0.130235	-0.70231	0.034586	-0.896435	0.184282
Kmarxianus_Y179_746	1	1507753..1511343	KLMA_10113	YGL140C	0.272283	0.440009	-0.212681	0.361603	0.107744	0.680911	0.3732	0.268424	0.415346	0.121182	0.703125	0.253176
Kmarxianus_Y179_747	1	complement(1511383..1512429)	KLMA_10112	UFD1	-0.377016	0.260619	0.195061	0.401621	-0.361316	0.0642314	-0.321162	0.351964	-0.402924	0.190674	-0.139108	0.839839
Kmarxianus_Y179_748	1	1512854..>1515941	KLMA_10111	TFC4	0.227134	0.493721	0.0801759	0.805526	-0.0509649	0.77032	-0.0759493	0.887013	-0.0332656	0.962965	1.14579	0.0383116
Kmarxianus_Y179_749	1	1516197..1517048	KLMA_10110	IST1	-0.56111	0.110666	0.0268302	0.917625	-0.340322	0.124412	-0.658854	0.0578359	-0.347353	0.277227	0.0881617	0.84876
Kmarxianus_Y179_750	1	complement(1517158..1518342)	KLMA_10109	TAM41	-0.369311	0.334706	-0.173382	0.393271	0.0624581	0.827706	0.0717879	0.809348	0.0369086	0.806046	0.942194	0.114452
Kmarxianus_Y179_751	1	complement(1518646..1521543)	KLMA_10108	PIK1	0.363528	0.329111	0.11913	0.676001	0.134983	0.543943	-0.141018	0.725453	0.101163	0.662333	0.29237	0.556107
Kmarxianus_Y179_752	1	complement(1522307..1524040)	KLMA_10107	LYP1	0.535212	0.183097	0.583655	0.0439351	0.188935	0.48934	1.07413	0.00278423	0.606024	0.0392928	0.496043	0.481806
Kmarxianus_Y179_753	1	1526650..1528392	KLMA_10106	CAN1	1.19263	0.00279899	-0.204256	0.440925	0.146617	0.635625	0.419603	0.22201	-0.0333754	0.960867	0.271899	0.763658
Kmarxianus_Y179_754	1	1530075..1535660	KLMA_10104	BNI1	0.578002	0.183479	0.158003	0.49823	0.263209	0.263506	0.528898	0.137526	0.577268	0.0587584	0.888115	0.196107
Kmarxianus_Y179_755	1	1535904..1537982	KLMA_10103	SEC2	0.310334	0.371422	0.185909	0.412068	0.0956576	0.702918	0.713115	0.0367736	0.589116	0.0304648	0.90111	0.105981
Kmarxianus_Y179_756	1	1538261..1539658	KLMA_10102	AVT2	-0.0126915	0.959881	-0.233466	0.285559	-0.0348642	0.871822	0.372104	0.384155	0.353888	0.231418	1.6741	0.0049122
Kmarxianus_Y179_757	1	complement(1539707..1543177)	KLMA_10101	TOF1	0.285568	0.374692	-0.223013	0.287268	0.131085	0.588265	0.524636	0.166273	0.339412	0.246414	0.1368	0.949261
Kmarxianus_Y179_758	1	1545790..1547355	KLMA_10100	CCN1	-2.5999e-05	0.897369	-0.64201	0.00611458	-0.0900109	0.631486	-0.0405258	0.937802	-0.0483691	0.997684	0.857385	0.127828
Kmarxianus_Y179_759	1	complement(1547588..1549288)	KLMA_10099	SLP1	-0.175354	0.663769	0.0380563	0.946808	-0.260973	0.173535	0.616537	0.0658884	0.798239	0.00599711	1.34122	0.0201411
Kmarxianus_Y179_760	1	complement(1549611..1553792)	KLMA_10098	TAF2	0.724829	0.0653279	0.140935	0.550965	0.277895	0.200665	0.579982	0.0872798	0.671185	0.0164842	1.13575	0.0464071
Kmarxianus_Y179_761	1	1554660..1555709	KLMA_10097	GOR1	-0.295143	0.474388	0.162485	0.570936	-0.0996552	0.571284	-0.832582	0.0389109	-1.07374	0.00150082	-1.57756	0.0119956
Kmarxianus_Y179_762	1	complement(1555861..1556247)	KLMA_10096	YCR043C	-0.451618	0.183788	-0.0930111	0.660317	0.0429734	0.918409	0.563261	0.107819	0.130784	0.581735	-0.344232	0.594505
Kmarxianus_Y179_763	1	complement(1556556..1558244)	KLMA_10095	BOR1	-0.269217	0.557754	-0.381127	0.0684451	-0.183982	0.355316	-0.567086	0.105038	-0.294669	0.383916	-0.218789	0.724844
Kmarxianus_Y179_764	1	complement(1558705..1559748)	KLMA_10094	PER1	-0.474062	0.220381	-0.135872	0.498563	0.24801	0.276088	1.00782	0.00412492	1.06099	0.0003306	1.26095	0.0242068
Kmarxianus_Y179_765	1	complement(<1560170..1560835)	KLMA_10093	SPC25	0.230332	0.435255	-0.711694	0.00252489	0.402809	0.242118	0.452411	0.342022	0.684204	0.0820794	0.242915	0.656439
Kmarxianus_Y179_766	1	<1561357..1562748	KLMA_10092	ISC1	-0.00633464	0.906679	-0.518657	0.0192811	0.143722	0.532423	0.101667	0.704028	0.0414938	0.799344	-0.740667	0.249007
Kmarxianus_Y179_767	1	1563585..1567280	KLMA_10091	ATG26	0.135283	0.729849	-0.180108	0.339095	-1.10426	2.92188e-06	-1.22236	0.00506422	-0.933008	0.0108689	-0.795365	0.266816
Kmarxianus_Y179_768	1	complement(1567643..1569121)	KLMA_10090	MET2	-0.250572	0.554133	-0.100486	0.665154	-0.31526	0.124778	-0.310471	0.403147	-0.394055	0.186944	-1.22471	0.0367906
Kmarxianus_Y179_769	1	complement(1569708..1571780)	KLMA_10089	MDL1	0.176491	0.587057	0.00304543	0.956132	-0.116893	0.542382	-0.407656	0.277714	-0.0153643	0.932862	-0.482912	0.448062
Kmarxianus_Y179_770	1	complement(1572197..1575571)	KLMA_10088	SKG3	0.814087	0.0451578	-0.774613	0.000380506	-0.122826	0.496027	-0.17773	0.589056	-0.193999	0.574346	-0.724272	0.253877
Kmarxianus_Y179_771	1	1576436..1576933	_	_	0.160888	0.894309	0.933209	0.248865	-0.292575	0.4628	1.01969	0.377348	-0.252665	0.740917	-1.08788	0.17348
Kmarxianus_Y179_772	1	complement(1577799..1579736)	KLMA_10086	PRM1	1.15364	0.0154021	0.878112	0.0630435	0.482024	0.254771	0.532965	0.365009	-0.239195	0.643486	-1.05155	0.0786765
Kmarxianus_Y179_773	1	complement(1580204..1580962)	KLMA_10085	EMG1	-0.27791	0.413829	-0.0750115	0.657785	0.342757	0.27244	0.246227	0.530044	-0.258072	0.469553	-1.01586	0.0801967
Kmarxianus_Y179_774	1	1581726..1583735	KLMA_10084	LCD1	0.119617	0.683233	-0.0364465	0.887987	0.241245	0.267271	1.0254	0.00278828	1.07168	0.000272995	1.41904	0.0135244
Kmarxianus_Y179_775	1	complement(1583984..>1584247)	KLMA_10083	RpL37a	-0.595613	0.144006	0.201383	0.492167	0.335811	0.169811	0.6942	0.113983	-0.124832	0.789511	-1.17436	0.103453
Kmarxianus_Y179_776	1	1585404..1586996	KLMA_10082	PLM2	-0.473593	0.278906	-0.413127	0.0615177	0.1427	0.579062	0.0336632	0.875863	-0.196405	0.568967	0.924477	0.0949082
Kmarxianus_Y179_777	1	complement(1587191..1589572)	KLMA_10081	SWI6	-0.104525	0.883639	-0.28387	0.185197	-0.0169592	0.868471	-0.16441	0.646325	0.118712	0.57365	0.794089	0.145247
Kmarxianus_Y179_778	1	1589825..1590922	KLMA_10080	VTA1	-0.492239	0.167115	0.0508376	0.930382	-0.519051	0.0170665	-0.472305	0.187046	-0.472731	0.1329	-0.387399	0.587559
Kmarxianus_Y179_779	1	complement(1591167..1592321)	KLMA_10079	SAM2	-0.659572	0.228582	-1.42935	8.06851e-07	0.944446	5.67159e-05	0.208656	0.616654	0.0388712	0.904355	-0.406908	0.584601
Kmarxianus_Y179_780	1	complement(1593215..1594048)	KLMA_10078	LPP1	-0.29603	0.541251	-0.090832	0.669988	-0.113778	0.671254	0.475639	0.218516	-0.127273	0.778768	-0.889589	0.11613
Kmarxianus_Y179_781	1	1595097..1595702	KLMA_10077	TFS1	-1.52352	0.000145371	-1.36636	1.45461e-09	-0.50095	0.0203165	-1.43331	0.00046015	-1.26471	0.000190759	-1.01118	0.110927
Kmarxianus_Y179_782	1	complement(1596420..1598921)	KLMA_10076	YLR177W	0.222678	0.576721	-0.560443	0.00532553	-0.0892911	0.631022	0.284255	0.402921	0.541113	0.0641221	0.649916	0.336884
Kmarxianus_Y179_783	1	complement(1600083..1602017)	KLMA_10075	GMC1	-0.201636	0.62255	-0.63376	0.00216337	0.345501	0.124121	0.154359	0.651479	0.188233	0.513128	0.462919	0.480931
Kmarxianus_Y179_784	1	1602441..1603667	KLMA_10074	_	-0.182166	0.660019	-0.02744	0.860684	0.270588	0.196828	-0.799768	0.0556244	-0.358495	0.310876	-0.32163	0.657692
Kmarxianus_Y179_785	1	complement(1603819..1607160)	KLMA_10073	GIN4	0.340066	0.380059	-0.132264	0.535922	0.509811	0.0185913	0.551127	0.119251	0.41122	0.105249	1.73	0.002803
Kmarxianus_Y179_786	1	complement(1608219..1608500)	KLMA_10072	SMT3	-0.0724656	0.915564	-0.0174089	0.928363	-0.12785	0.552876	-0.186122	0.664335	-0.271938	0.47534	-0.521804	0.430077
Kmarxianus_Y179_787	1	1610634..1612490	KLMA_10071	GNP1	0.407252	0.312011	-0.255333	0.350984	0.277848	0.246281	-0.56492	0.153536	-0.248254	0.54777	-1.58079	0.0324389
Kmarxianus_Y179_788	1	1613252..1613842	KLMA_10070	HBN1	-0.104706	0.847419	0.316009	0.26489	0.00100221	0.966931	0.148175	0.722657	-0.263396	0.465981	-0.791999	0.207685
Kmarxianus_Y179_789	1	1614593..1615183	KLMA_10069	HBN1	-0.438243	0.168437	0.488456	0.0291318	-0.046395	0.765567	-0.0387858	0.939682	-0.469066	0.144246	-0.807857	0.188183
Kmarxianus_Y179_790	1	complement(1615474..1617051)	KLMA_10068	FUS1	0.583305	0.0986901	0.481204	0.086889	-0.335291	0.197503	-0.553005	0.142413	-0.716794	0.0352248	-1.17537	0.0558577
Kmarxianus_Y179_791	1	1620254..1621417	KLMA_10067	PRY2	0.797387	0.0674462	0.303398	0.300526	0.71017	0.00103276	0.796707	0.0166675	0.904185	0.00148299	1.02372	0.0742003
Kmarxianus_Y179_792	1	1622010..1623242	KLMA_10066	BIK1	-0.332209	0.354128	0.0405902	0.898864	-0.100866	0.597972	-0.524527	0.123328	-0.309944	0.352934	0.0670483	0.846477
Kmarxianus_Y179_793	1	1623589..1625997	KLMA_10065	HIS4	0.0811818	0.777777	0.0201575	0.996952	0.0758537	0.833137	-0.0193086	0.971333	0.471419	0.134148	1.22746	0.0806014
Kmarxianus_Y179_794	1	1626284..1626670	KLMA_10064	ACN9	-0.211237	0.697704	-0.12635	0.566575	-0.0413125	0.844989	-0.581782	0.109232	-0.52058	0.0940391	-1.57926	0.0077054
Kmarxianus_Y179_795	1	1626843..1627820	KLMA_10063	RRP7	-0.231498	0.498084	0.27026	0.224037	0.449687	0.042662	0.742512	0.0320972	0.342549	0.184916	0.49843	0.363817
Kmarxianus_Y179_796	1	complement(1627991..1628890)	KLMA_10062	STE50	-0.0205977	0.867949	0.205445	0.377859	0.0847977	0.746472	0.144668	0.668693	-0.156844	0.652955	-0.418762	0.48751
Kmarxianus_Y179_797	1	complement(1629258..1629518)	KLMA_10061	EMI1	-0.428747	0.170153	0.600612	0.0262566	0.339507	0.378287	-0.609804	0.121977	-0.197049	0.687908	-1.92053	0.00444822
Kmarxianus_Y179_798	1	1629793..1630224	KLMA_10060	MXR2	-0.43001	0.139021	0.430992	0.0874858	-0.182654	0.510729	-1.05857	0.00231098	-0.955923	0.00147165	-0.44261	0.499254
Kmarxianus_Y179_799	1	complement(1630294..1631292)	KLMA_10059	LSB5	-0.357925	0.425404	-0.508944	0.0380617	-0.177959	0.433385	-0.364665	0.35651	-0.116559	0.798735	0.386406	0.452012
Kmarxianus_Y179_800	1	1632585..1632908	KLMA_10058	GRX2	-0.846271	0.0519187	-0.115915	0.635659	-0.0135946	0.874926	-0.151539	0.750903	-0.400107	0.314528	-1.62719	0.0331845
Kmarxianus_Y179_801	1	complement(1633117..1634364)	KLMA_10057	_	0.836987	0.0565446	0.257994	0.361075	1.14929	4.54647e-08	0.876469	0.0348293	0.667069	0.0320191	0.0429139	0.960256
Kmarxianus_Y179_802	1	complement(1635668..1636834)	KLMA_10056	YDR514C	0.0756178	0.752063	0.0587878	0.857001	0.442739	0.135301	0.907142	0.0644377	0.32701	0.34135	0.440903	0.469596
Kmarxianus_Y179_803	1	complement(1637160..1638245)	KLMA_10055	YDR514C	-0.189334	0.677726	0.152614	0.549401	-0.194445	0.344124	-0.24012	0.497883	-0.0971272	0.846208	0.42343	0.426847
Kmarxianus_Y179_804	1	1638733..1640184	KLMA_10054	SRO9	0.607488	0.122737	0.0909267	0.748564	0.952391	0.000501136	0.110552	0.687227	-0.171752	0.646652	-0.306727	0.566452
Kmarxianus_Y179_805	1	1640587..1642077	KLMA_10053	ATG22	-0.496812	0.200646	-0.00735902	0.944127	-0.326436	0.10674	-0.635892	0.0654763	-0.255537	0.434741	-0.458138	0.468652
Kmarxianus_Y179_806	1	complement(1642070..1644220)	KLMA_10052	GID7	0.0105636	0.921593	-0.00302492	0.920053	-0.409001	0.0535083	-1.0534	0.00670437	-0.759906	0.0213278	-0.456318	0.496472
Kmarxianus_Y179_807	1	complement(1644828..1646273)	KLMA_10051	GLK1	-0.410162	0.345577	-0.161392	0.497176	-0.59339	0.00379569	-1.35421	0.000611331	-1.18484	0.000979596	-1.87067	0.0090012
Kmarxianus_Y179_808	1	1647626..1648798	KLMA_10050	GRH1	-0.512754	0.155419	0.219256	0.372695	-0.00820803	0.90804	-0.046451	0.975685	0.12255	0.58825	0.653386	0.236258
Kmarxianus_Y179_809	1	1649243..1650805	KLMA_10049	PDI1	-0.237093	0.677983	-0.163912	0.521894	0.47573	0.0645133	0.438417	0.294514	0.443341	0.190084	0.794794	0.270269
Kmarxianus_Y179_810	1	1651258..1652418	KLMA_10048	MGR1	-0.161827	0.568346	0.421265	0.0595901	0.0195923	0.967365	0.112913	0.75627	0.663007	0.0263194	-0.364527	0.595804
Kmarxianus_Y179_811	1	1652755..1654917	KLMA_10047	EMC1	0.141693	0.64101	0.0709432	0.806831	-0.00592052	0.933527	-0.0887675	0.830662	0.225888	0.350842	0.999342	0.0763079
Kmarxianus_Y179_812	1	1655206..1655628	KLMA_10046	FPR2	-0.667424	0.0586207	-0.099693	0.622976	0.116776	0.64992	0.0042386	0.983494	-0.273944	0.443454	-0.120218	0.850558
Kmarxianus_Y179_813	1	complement(1655770..1657710)	KLMA_10045	URC2	0.309733	0.349508	0.0222288	1	-0.122778	0.525623	-0.0349806	0.937222	0.279067	0.300862	0.738886	0.215564
Kmarxianus_Y179_814	1	complement(1658100..1659392)	KLMA_10044	SPS22	0.474069	0.32327	-0.118351	0.803086	0.0849724	0.844983	1.34359	7.97622e-05	1.74833	1.71249e-09	2.23575	0.000395133
Kmarxianus_Y179_815	1	complement(1660100..1661590)	KLMA_10043	SPS1	0.7201	0.0684226	0.41969	0.242734	0.255251	0.248594	1.24725	0.000409396	1.3749	3.42391e-06	1.81543	0.00604782
Kmarxianus_Y179_816	1	1666132..1666359	KLMA_10039	SNA2	-1.34998	9.33066e-05	-0.538896	0.0271457	-0.36703	0.104624	-1.10125	0.00337353	-1.03935	0.00193559	-2.22411	0.00075513
Kmarxianus_Y179_817	1	1666786..1668222	KLMA_10038	RBA50	0.244765	0.398257	-0.0155746	0.891374	0.330254	0.240814	-0.13563	0.710252	-0.302713	0.332502	-1.35245	0.0243955
Kmarxianus_Y179_818	1	1668931..1669986	KLMA_10037	KRE28	-0.111441	0.809985	-0.208771	0.498708	0.514851	0.212644	0.220039	0.664633	0.00685939	0.972662	0.377626	0.517542
Kmarxianus_Y179_819	1	complement(1670089..1671183)	KLMA_10036	CAB1	-0.334524	0.473948	-0.418478	0.0634259	0.427894	0.170053	-0.429344	0.245586	-0.0451709	0.975934	0.250071	0.598743
Kmarxianus_Y179_820	1	1672378..1673361	KLMA_10035	APA2	-0.541558	0.268145	-0.315631	0.25154	0.0587102	0.831922	0.219128	0.546465	0.200168	0.446924	0.468603	0.391421
Kmarxianus_Y179_821	1	1673858..1674241	KLMA_10034	QCR7	0.0656655	0.8822	0.816164	0.00170745	-0.596386	0.00889152	-0.811907	0.0939743	-0.156887	0.747545	-1.16238	0.163837
Kmarxianus_Y179_822	1	complement(1674976..1676382)	KLMA_10033	LRE1	0.242353	0.544433	-0.608624	0.00656045	0.569182	0.0135258	1.48982	0.000351026	1.70473	2.04815e-06	2.44881	0.00545521
Kmarxianus_Y179_823	1	1678312..1679586	KLMA_10032	PBN1	-0.434773	0.276571	-0.520921	0.00965148	0.0469237	0.877298	0.0635761	0.885531	0.166047	0.540443	0.435343	0.461338
Kmarxianus_Y179_824	1	complement(1679666..1682173)	KLMA_10031	SPB1	0.631775	0.0804034	-0.820367	9.34632e-05	0.840736	0.00266361	0.0710396	0.789897	-0.0682992	0.882324	-0.270848	0.553065
Kmarxianus_Y179_825	1	1682999..1684516	KLMA_10030	_	0.116661	0.670125	0.0933879	0.744699	0.109348	0.70509	0.936846	0.01185	0.261032	0.321731	0.0055771	0.940036
Kmarxianus_Y179_826	1	complement(1684706..1685677)	KLMA_10029	KAR4	0.358457	0.400905	0.147336	0.630243	-0.88687	0.000716997	-0.32419	0.408733	-0.210213	0.612958	-0.328731	0.653248
Kmarxianus_Y179_827	1	1686259..1687359	KLMA_10028	_	0.639241	0.47513	0.868243	0.176164	0.47985	0.293122	1.59528	0.00547573	1.68223	0.000563823	1.34662	0.0525924
Kmarxianus_Y179_828	1	complement(1687823..1688833)	KLMA_10027	_	0.102892	0.733463	0.0970134	0.681628	-0.0468738	0.731224	-0.383847	0.319683	-0.345036	0.34638	-0.671464	0.323626
Kmarxianus_Y179_829	1	1690731..1691324	KLMA_10026	_	-0.409298	0.265009	0.105275	0.700765	0.110315	0.779145	-0.197812	0.521185	0.0901627	0.622578	0.507773	0.409043
Kmarxianus_Y179_830	1	complement(1691341..1693479)	KLMA_10025	PRD1	0.745129	0.0526453	0.640112	0.00353478	-0.0112277	0.879667	0.160442	0.688523	0.0541247	0.714364	0.894036	0.106081
Kmarxianus_Y179_831	1	1694304..1694552	KLMA_10024	MOS1	-0.34533	0.308259	0.527509	0.0228279	-0.76348	0.000212588	-0.695328	0.0801945	-0.322631	0.344469	-1.06461	0.0792676
Kmarxianus_Y179_832	1	complement(1695082..1695426)	KLMA_10023	_	-0.141806	0.701438	0.0483471	0.885804	0.16871	0.667778	-0.0609113	0.840313	-0.469439	0.176839	-1.6684	0.00441045
Kmarxianus_Y179_833	1	1695850..1696809	KLMA_10022	KRR1	-0.108489	0.875377	-0.302065	0.1238	0.986737	0.000473505	0.20626	0.51992	-0.137	0.729978	-1.38025	0.0182639
Kmarxianus_Y179_834	1	1697188..1700028	KLMA_10021	MRC1	0.0938253	0.732069	-0.230868	0.265836	0.145525	0.604526	0.519894	0.167577	0.659169	0.0279145	1.54485	0.00671945
Kmarxianus_Y179_835	1	complement(1700076..1701560)	KLMA_10020	VAC17	-0.184597	0.731773	-0.0712742	0.716984	0.395277	0.154413	0.687205	0.129789	0.593879	0.113758	1.61278	0.00853062
Kmarxianus_Y179_836	1	1702402..1703478	KLMA_10018	CHA1	-1.63935	0.000130915	-0.320298	0.218559	-0.393031	0.100002	-1.21844	0.00511444	-1.19792	0.000202119	-1.23172	0.0477933
Kmarxianus_Y179_837	1	1706103..1708814	KLMA_10016	HMLALPHA3	0.944292	0.0723607	1.05529	0.000829335	1.06695	0.0098641	1.38458	0.0496335	1.12316	0.00713838	1.13474	0.0612162
Kmarxianus_Y179_838	1	complement(1709151..1709828)	KLMA_10015	HMLALPHA2	1.10867	0.014679	1.22206	0.000259649	0.842393	0.118027	0.440621	0.515002	0.622997	0.152369	0.434934	0.432971
Kmarxianus_Y179_839	1	1710095..1710874	KLMA_10014	MATALPHA1	0.953719	0.0767727	1.35993	0.00175123	0.939684	0.121128	0.42426	0.534981	0.00630629	0.736564	0.681341	0.281101
Kmarxianus_Y179_840	1	complement(1710935..1711492)	KLMA_10013	SLA2	0.31567	0.345629	0.463952	0.0869624	-0.188431	0.466588	0.344686	0.55193	-0.0872963	0.901421	0.225903	0.694811
Kmarxianus_Y179_841	1	complement(1713587..1717414)	KLMA_10012	_	0.436083	0.212695	0.457291	0.0852774	-0.256595	0.193917	-0.382737	0.237848	-0.508571	0.100232	-0.249351	0.683301
Kmarxianus_Y179_842	1	1718231..1719772	KLMA_10011	FEN2	-0.216758	0.616012	-0.0194255	0.871933	-0.586014	0.0196069	-0.645594	0.103543	-1.36798	2.71585e-05	-1.88494	0.00197928
Kmarxianus_Y179_843	1	1721497..1723356	KLMA_10010	ARN2	-0.84828	0.0408433	-0.943502	0.000123768	-0.458296	0.03686	-0.57025	0.105122	-0.438682	0.187249	-0.953424	0.100755
Kmarxianus_Y179_844	1	1724682..1726214	KLMA_10009	AMF1	0.171677	0.644151	0.388502	0.275843	-0.681223	0.0194218	-1.40559	0.000923848	-1.41792	5.54029e-05	-1.08153	0.0990356
Kmarxianus_Y179_845	1	complement(1728053..>1729945)	KLMA_10008	ARN2	0.0713627	0.945164	0.84258	0.0793711	-0.730415	0.0479325	-1.06919	0.0262942	-1.36822	0.000112702	-2.37883	7.69394e-05
Kmarxianus_Y179_846	1	complement(1730760..1732229)	KLMA_10007	BIO3	0.143809	0.646725	-0.493348	0.19618	-0.636886	0.0105651	0.108135	0.760839	0.243139	0.450397	1.25396	0.0264315
Kmarxianus_Y179_847	1	1732752..>1733338	KLMA_50636	BIO4	-0.335362	0.591228	-0.30608	0.603655	-0.415973	0.250081	-0.585306	0.37536	-0.270924	0.485926	-0.2722	0.886197
Kmarxianus_Y179_848	1	1733814..>1734506	KLMA_10005	BIO5	-1.49346	0.112323	1.30403	0.18836	-0.0139031	1	-0.442894	0.763198	0.265656	1	0.227413	1
Kmarxianus_Y179_849	2	<592..2169	KLMA_10001	TY2B-GR2	0.708663	0.289072	0.201995	0.872115	-1.04756	0.0850321	-0.709904	0.376221	-1.54941	0.0334386	-1.67194	0.139342
Kmarxianus_Y179_850	2	3173..>4803	KLMA_10836	FCY2	0.728644	0.0551224	0.838928	0.000557939	-0.129825	0.493947	-0.391577	0.28637	-0.388186	0.182498	-1.31354	0.0220539
Kmarxianus_Y179_851	2	complement(5400..6086)	KLMA_20002	FLO5	0.0617466	0.770629	0.390694	0.14988	0.39175	0.0763262	-0.0427956	0.881696	-0.101975	0.807672	-0.523357	0.390127
Kmarxianus_Y179_852	2	complement(<7140..>7922)	KLMA_20002	FLO9	0.609969	0.105446	0.150307	0.634091	-0.321166	0.147934	-0.530383	0.16692	-0.392412	0.21964	-0.716352	0.263169
Kmarxianus_Y179_853	2	12195..12455	KLMA_20003	_	-0.540314	0.172342	-0.413115	0.156807	-0.283969	0.235699	-0.508906	0.209299	-0.356854	0.384865	-1.26046	0.0506099
Kmarxianus_Y179_854	2	13722..16103	KLMA_20004	OPT1	-0.259184	0.545939	-1.55072	1.22318e-09	-0.18556	0.298443	-0.667251	0.0390863	-0.385843	0.230824	-0.0190159	1
Kmarxianus_Y179_855	2	17392..18648	KLMA_20005	ADH4a	-0.259548	0.508792	0.161565	0.624421	-0.238434	0.318313	0.85686	0.0343884	1.14617	0.000722985	2.13742	0.000269217
Kmarxianus_Y179_856	2	20278..22338	KLMA_20006	DUR3	0.233521	0.474055	-0.00049245	0.949107	-0.507896	0.0116995	-0.335242	0.293878	-0.491289	0.116634	-0.587051	0.350147
Kmarxianus_Y179_857	2	complement(22986..24500)	KLMA_20007	yxeK	-0.501948	0.206057	-0.261701	0.376887	-0.682274	0.00386091	-0.226467	0.545562	-0.483525	0.133351	0.396464	0.437645
Kmarxianus_Y179_858	2	26451..28670	KLMA_20008	FRE4	0.68582	0.0888496	0.176975	0.688482	-0.708606	0.000525151	-0.457533	0.206567	-0.394538	0.214142	0.88085	0.0882149
Kmarxianus_Y179_859	2	29706..30536	KLMA_20009	ADY2	0.264431	0.433458	-0.0782295	0.684663	-0.121101	0.642369	-0.92949	0.00867715	-0.94527	0.00265962	-1.11641	0.0538171
Kmarxianus_Y179_860	2	complement(30867..31349)	KLMA_20010	_	-0.586822	0.113612	-0.0371317	0.797468	-0.258939	0.252036	-0.478837	0.168419	-0.713169	0.0174114	-0.946998	0.120769
Kmarxianus_Y179_861	2	32336..34105	KLMA_20011	MNT4	0.227894	0.503176	-0.0217381	0.942358	0.207984	0.345959	0.765079	0.0301348	0.746787	0.0130943	1.4916	0.0188358
Kmarxianus_Y179_862	2	complement(34308..35918)	KLMA_20012	yciC	0.00952529	0.856997	0.597301	0.0295406	-0.364277	0.127797	-0.17243	0.638987	0.204098	0.39848	-0.144739	0.832025
Kmarxianus_Y179_863	2	complement(37144..37614)	_	_	0.241149	0.561227	1.11236	0.0436256	0.561625	0.235297	-0.32364	0.616955	0.587977	0.464387	-0.30469	0.72065
Kmarxianus_Y179_864	2	38879..40555	KLMA_20013	BEM1	0.825028	0.0251573	0.219837	0.306349	0.0811737	0.819775	0.733156	0.0457085	0.306489	0.282738	0.490595	0.359923
Kmarxianus_Y179_865	2	complement(40763..41104)	KLMA_20014	_	-1.00661	0.00633847	-0.270458	0.189149	-0.591067	0.00410832	-0.786553	0.0490152	-0.908703	0.0077702	-1.42834	0.0236121
Kmarxianus_Y179_866	2	41439..42194	KLMA_20015	YUH1	-0.789817	0.0323904	-0.248368	0.238572	-0.306243	0.163544	-0.618738	0.0725098	-0.318487	0.335907	1.44905	0.0107237
Kmarxianus_Y179_867	2	complement(42234..44141)	KLMA_20016	THP3	0.147801	0.599863	-0.0189414	0.902919	-0.227188	0.252935	-0.448225	0.20711	-0.313533	0.364357	-0.474145	0.473445
Kmarxianus_Y179_868	2	complement(44528..45466)	KLMA_20017	uch2	-0.660091	0.0366939	0.143991	0.511213	-0.293101	0.187331	-0.41349	0.216909	-0.621298	0.0536446	0.133246	0.773107
Kmarxianus_Y179_869	2	complement(45671..46585)	KLMA_20018	AIM25	-0.228443	0.478858	0.103539	0.716075	-0.199696	0.373702	-0.858994	0.013639	-0.608979	0.0530772	-0.367132	0.562483
Kmarxianus_Y179_870	2	complement(47098..48024)	KLMA_20019	PPH3	0.366807	0.268452	0.0171233	0.982955	0.161519	0.592865	1.26097	0.0038352	0.40513	0.233135	0.875575	0.131703
Kmarxianus_Y179_871	2	48744..49826	KLMA_20020	PEA2	0.103629	0.814562	0.373788	0.103952	0.585753	0.0342023	1.18905	0.00162499	1.15275	0.000302318	1.38434	0.015128
Kmarxianus_Y179_872	2	complement(50164..50865)	KLMA_20021	SPT15	-0.241553	0.504707	0.154249	0.523337	0.0154978	0.992613	0.0699458	0.857942	-0.193948	0.562879	-0.770331	0.23453
Kmarxianus_Y179_873	2	51346..53307	KLMA_20022	SCC4	-0.213825	0.65194	0.157925	0.494487	0.0874209	0.759382	0.409344	0.229759	0.600101	0.0261303	1.0686	0.0644853
Kmarxianus_Y179_874	2	complement(53580..56378)	KLMA_20023	TPS2	-0.0389517	0.996686	-0.434208	0.109888	0.159965	0.519176	-0.00281338	0.954579	0.422495	0.184456	0.920405	0.190387
Kmarxianus_Y179_875	2	complement(56705..57202)	_	SNF11	0.162762	0.575006	0.191978	0.513288	0.160358	0.549585	0.421508	0.194873	0.400751	0.125583	-1.04203	0.0932694
Kmarxianus_Y179_876	2	58489..60126	KLMA_20024	IPT1	0.338892	0.296209	0.210941	0.408691	0.0347491	1	0.0692399	0.819271	-0.135701	0.764218	-0.957791	0.18515
Kmarxianus_Y179_877	2	complement(60337..60606)	KLMA_20025	LSM5	-0.959963	0.00461991	0.267048	0.26917	0.23007	0.361911	1.03845	0.00243227	0.370064	0.160672	-0.206645	0.813805
Kmarxianus_Y179_878	2	61495..62079	KLMA_20026	PAA1	-0.465467	0.214286	-0.150733	0.529164	-0.183487	0.404447	-0.122877	0.772488	-0.0777432	0.911631	0.0641329	0.893913
Kmarxianus_Y179_879	2	62767..63036	KLMA_20027	FMP16	-2.11159	2.22247e-06	-0.680874	0.145614	-1.3048	0.00104763	-3.23137	4.09957e-10	-2.59386	2.91292e-11	-2.61032	0.000187967
Kmarxianus_Y179_880	2	63633..66032	KLMA_20028	DOA4	0.173299	0.609876	0.248057	0.26639	0.0461145	0.850079	0.0407667	0.93025	0.184763	0.479066	0.080129	0.834823
Kmarxianus_Y179_881	2	complement(66097..66990)	KLMA_20029	DOS2	-0.528886	0.170884	-0.0625976	0.725519	-0.434711	0.0411599	-0.578168	0.0991384	-0.522945	0.0961831	-0.130547	0.880792
Kmarxianus_Y179_882	2	67293..67985	KLMA_20030	OCA6	-0.358704	0.243887	0.17685	0.43226	-0.51793	0.029644	-0.803103	0.019694	-0.522032	0.112031	-0.248234	0.667577
Kmarxianus_Y179_883	2	complement(68067..69326)	KLMA_20031	DDI1	-0.327427	0.38728	0.0537136	0.835747	-0.161019	0.418422	-0.414538	0.233267	-0.657359	0.0263669	-0.765474	0.218319
Kmarxianus_Y179_884	2	69526..70365	KLMA_20032	MAG1	-0.314508	0.312816	0.263724	0.354101	-0.286391	0.232333	-0.0625852	0.803682	-0.192727	0.63157	0.175117	0.718571
Kmarxianus_Y179_885	2	complement(70525..72003)	KLMA_20033	COX15	-0.681261	0.0947606	-0.182538	0.407074	0.0658741	0.817833	-1.2519	0.00384732	-0.372165	0.32082	-2.4414	0.00168361
Kmarxianus_Y179_886	2	complement(72343..75717)	KLMA_20035	PIM1	0.70543	0.0796772	0.365941	0.164228	-0.116459	0.575908	-0.330017	0.459157	0.278853	0.366967	0.64437	0.393344
Kmarxianus_Y179_887	2	complement(76244..76900)	KLMA_20036	HAP3	-0.0714784	0.923507	0.461979	0.0898283	0.238917	0.467337	-0.0420058	0.996464	0.158183	0.554503	-0.661596	0.285399
Kmarxianus_Y179_888	2	77177..78868	KLMA_20037	RFT1	0.0447695	0.813063	0.25543	0.288339	0.15059	0.62158	0.321589	0.440341	0.216891	0.441748	1.15674	0.0436082
Kmarxianus_Y179_889	2	79079..80569	KLMA_20038	APN2	-0.29263	0.445169	-0.0245866	0.842813	-0.158107	0.460594	0.142086	0.686928	0.111865	0.648294	0.795611	0.169264
Kmarxianus_Y179_890	2	complement(<80640..>80996)	KLMA_20039	POP8	-0.554241	0.187206	-0.192017	0.508305	-0.16974	0.57025	0.232996	0.703389	-0.139287	0.86115	0.741697	0.25357
Kmarxianus_Y179_891	2	complement(81396..86099)	KLMA_20040	VPS10	0.527806	0.189025	0.303363	0.213456	-0.119657	0.566605	-0.448812	0.27452	-0.264005	0.503235	0.169261	0.782022
Kmarxianus_Y179_892	2	86766..87866	KLMA_20041	FUS3	-0.20266	0.770909	0.395218	0.330318	-1.90948	5.76802e-10	-0.990336	0.00491151	-1.18111	6.18887e-05	-1.04462	0.0705348
Kmarxianus_Y179_893	2	complement(87879..88487)	_	_	-0.151875	0.804384	0.757416	0.103534	-0.615393	0.272511	-0.180801	0.600834	0.0572537	0.850265	-1.49439	0.0363053
Kmarxianus_Y179_894	2	89622..91193	KLMA_20042	ACH1	-0.0619896	0.892119	0.33577	0.248911	-0.491046	0.0381861	-0.579407	0.2479	-0.244544	0.597856	-1.09705	0.232724
Kmarxianus_Y179_895	2	complement(91847..92938)	KLMA_20043	FMT1	0.15317	0.634815	0.346043	0.261046	-0.206877	0.445183	-0.225833	0.568566	-0.327292	0.350269	0.120892	0.848845
Kmarxianus_Y179_896	2	93145..93996	KLMA_20044	_	0.756204	0.114094	-0.30047	0.380249	-0.308237	0.34091	0.736125	0.172131	0.470952	0.276715	1.13749	0.0844894
Kmarxianus_Y179_897	2	94230..95216	KLMA_20045	PGD1	0.0928274	0.710976	0.269579	0.267355	-0.063581	0.759462	-0.0534224	0.927712	0.086092	0.707471	0.489635	0.390765
Kmarxianus_Y179_898	2	95606..97735	KLMA_20046	TRP5	0.324348	0.388432	0.217138	0.498944	0.047193	0.914092	0.200639	0.633408	0.942852	0.00593373	1.45161	0.0531737
Kmarxianus_Y179_899	2	98153..100792	KLMA_20047	RRN6	0.604702	0.0734249	0.0193075	0.942027	0.517328	0.0182646	1.02495	0.0022869	1.21553	1.35412e-05	1.78411	0.004254
Kmarxianus_Y179_900	2	101195..103654	KLMA_20048	CWH41	0.269597	0.427873	0.279025	0.227783	-0.114839	0.502163	0.819731	0.0178116	0.379284	0.172406	1.05988	0.0643187
Kmarxianus_Y179_901	2	104589..106133	KLMA_20049	SCW11	0.770461	0.0713806	0.152712	0.578938	-0.193536	0.29547	0.891882	0.00728444	1.75162	3.99869e-09	1.24531	0.0388464
Kmarxianus_Y179_902	2	complement(106401..107435)	KLMA_20050	MIOX5	0.205377	0.534412	0.344397	0.166972	-0.0975928	0.647474	0.134278	0.800232	0.129314	0.743003	0.168579	0.827211
Kmarxianus_Y179_903	2	complement(107932..108300)	KLMA_20051	CGR1	0.137842	0.66594	0.225695	0.469281	0.489903	0.176203	0.933233	0.0182918	0.172759	0.476008	-0.612446	0.263138
Kmarxianus_Y179_904	2	108570..111167	_	CCM1	0.680842	0.0414545	-0.79251	0.00036423	-0.128742	0.457247	0.316799	0.386093	0.268446	0.300575	0.362513	0.601379
Kmarxianus_Y179_905	2	complement(111455..112684)	KLMA_20052	YGR149W	-0.29874	0.470603	0.0590056	0.89357	-0.0366031	0.826618	-0.817073	0.0195861	-0.777914	0.00691684	-1.30473	0.0311921
Kmarxianus_Y179_906	2	complement(113154..>113468)	KLMA_20053	RPL30	-0.88187	0.0449058	0.26029	0.408336	0.5234	0.0325965	1.08124	0.00979314	-0.147966	0.725216	-1.44936	0.0399354
Kmarxianus_Y179_907	2	115004..115471	KLMA_20054	RPL24	-0.40284	0.396449	0.218669	0.424374	0.351198	0.159691	0.238784	0.554232	-0.624656	0.0909797	-1.48669	0.0355499
Kmarxianus_Y179_908	2	116191..116463	KLMA_20055	AGA2	-0.000718568	0.909551	0.678513	0.314674	-1.82112	6.40464e-06	-1.19757	0.101864	-0.676668	0.208786	0.191967	0.925
Kmarxianus_Y179_909	2	116996..117649	KLMA_20056	NAT2	-0.0886556	0.842081	0.162539	0.497258	-0.159307	0.478044	-1.30682	0.000436235	-0.680469	0.0246589	-1.30914	0.0191563
Kmarxianus_Y179_910	2	complement(117829..118752)	KLMA_20057	_	-0.134164	0.723968	-0.00280111	0.982579	-0.519135	0.0111495	-0.51631	0.157703	-0.659175	0.0296957	-0.107412	0.910008
Kmarxianus_Y179_911	2	complement(<119562..>120131)	KLMA_20058	HOP2	-0.18958	0.755738	-0.514959	0.257911	-0.317969	0.497977	-0.741391	0.194813	-1.20979	0.0111968	-1.6941	0.00980261
Kmarxianus_Y179_912	2	complement(120601..121887)	_	_	-0.744736	0.0911866	-0.920592	0.00230872	-0.465811	0.123367	-0.603508	0.230785	-0.377671	0.362724	-1.52927	0.016047
Kmarxianus_Y179_913	2	123625..125274	KLMA_20059	MIG1	0.888204	0.0238128	0.249386	0.338276	-0.334018	0.117336	0.377226	0.243439	-0.86391	0.0112095	-0.786448	0.294133
Kmarxianus_Y179_914	2	125656..126978	KLMA_20060	PRP24	0.0599511	0.775443	0.10246	0.695476	-0.0221667	0.880107	0.388992	0.316029	0.510032	0.0871086	0.92946	0.0915641
Kmarxianus_Y179_915	2	complement(127074..131903)	KLMA_20061	NUP188	0.477644	0.223301	0.0254108	0.988329	0.289202	0.188515	0.348758	0.310286	0.606256	0.0237229	1.54574	0.009513
Kmarxianus_Y179_916	2	complement(132182..133060)	KLMA_20062	PPA2	-0.0739139	0.905429	-0.0595322	0.698566	-0.186804	0.349208	-0.253933	0.456697	0.225052	0.35003	0.637872	0.23825
Kmarxianus_Y179_917	2	complement(133417..136140)	KLMA_20063	RSN1	0.81953	0.0990804	-0.466878	0.0828498	-0.10156	0.608877	-0.115277	0.834163	-0.274648	0.512692	-0.982563	0.296541
Kmarxianus_Y179_918	2	137019..138350	KLMA_20064	YMR265C	1.00178	0.022836	0.323756	0.340358	0.444323	0.247462	0.356908	0.43623	0.168656	0.610013	0.398437	0.46274
Kmarxianus_Y179_919	2	138597..140111	KLMA_20065	YMR265C	0.6115	0.167369	0.351692	0.310601	0.400868	0.217966	-0.86835	0.0279731	-0.130246	0.723434	-1.16188	0.0613719
Kmarxianus_Y179_920	2	140745..142295	KLMA_20067	CAC2	0.0632886	0.824855	-0.294036	0.129967	0.227888	0.389073	-0.147668	0.679469	0.103254	0.608373	-0.0669592	0.963356
Kmarxianus_Y179_921	2	complement(143314..143919)	KLMA_20068	CUE1	-0.646869	0.089226	0.00986131	0.960477	-0.030884	0.856668	-0.342602	0.376618	-0.398968	0.208773	-0.909534	0.135814
Kmarxianus_Y179_922	2	complement(144206..144718)	KLMA_20069	SAP30	0.073489	0.750396	0.391713	0.161891	-0.302614	0.298609	-0.158218	0.687655	-0.701729	0.0222254	-0.820015	0.173142
Kmarxianus_Y179_923	2	complement(144972..146207)	KLMA_20070	YMR262W	0.0939962	0.683554	0.218842	0.538689	-0.29097	0.246288	0.032424	0.823917	-0.155277	0.687334	-0.159191	0.843294
Kmarxianus_Y179_924	2	complement(146340..146951)	KLMA_20072	PRM8	-0.373328	0.359583	-0.0124105	0.905772	-0.358214	0.0850623	-0.428826	0.243722	-0.760131	0.0171535	-1.86809	0.00296882
Kmarxianus_Y179_925	2	complement(147302..147898)	KLMA_20073	YAR028W	-0.566177	0.0758869	0.0637717	0.854075	-0.417014	0.0536342	-0.385909	0.28392	-0.612753	0.0406318	-0.429007	0.476266
Kmarxianus_Y179_926	2	148794..152531	KLMA_20074	TSL1	0.0605816	0.977077	-0.475219	0.0835863	0.0406434	0.938794	-0.234037	0.657811	0.0326961	0.878649	0.286414	0.724226
Kmarxianus_Y179_927	2	153241..153711	KLMA_20075	TIF11	-0.333625	0.383264	0.425217	0.133523	-0.0345762	0.81549	-0.505551	0.215723	-0.604946	0.0853262	-1.46304	0.0272483
Kmarxianus_Y179_928	2	complement(153958..155022)	KLMA_20076	NIPA2	-0.000849958	0.901842	0.149104	0.597504	0.157506	0.571946	0.950866	0.00992881	1.28407	3.78661e-05	1.48365	0.00932974
Kmarxianus_Y179_929	2	complement(155302..156870)	KLMA_20077	SIF2	0.328483	0.373569	0.0134957	0.948276	0.132008	0.552395	-0.0996617	0.884931	0.378822	0.154068	0.37901	0.457173
Kmarxianus_Y179_930	2	157218..159380	KLMA_20078	EXO84	0.521307	0.184879	0.199226	0.419081	-0.0716095	0.698366	-0.120212	0.783857	0.489165	0.0826804	0.621892	0.304934
Kmarxianus_Y179_931	2	159770..160642	KLMA_20079	FES1	-0.424595	0.238731	0.141677	0.564368	0.340032	0.123778	0.488266	0.234974	1.07788	0.00110164	0.56996	0.390696
Kmarxianus_Y179_932	2	complement(160826..162955)	KLMA_20080	EME1	0.230484	0.457395	-0.19169	0.423878	0.0724307	0.834991	0.559328	0.103194	0.850499	0.00238243	1.01903	0.0811271
Kmarxianus_Y179_933	2	complement(163236..166310)	KLMA_20081	SEC8	0.308938	0.380594	0.0412311	0.905634	-0.0346477	0.784214	0.348846	0.326162	0.738203	0.00956701	1.49523	0.00918608
Kmarxianus_Y179_934	2	complement(166656..167525)	KLMA_20082	SNF6	-0.00984646	0.965755	0.289991	0.206062	0.052444	0.849007	0.35631	0.303531	0.536412	0.0703655	0.688365	0.222704
Kmarxianus_Y179_935	2	168337..170802	KLMA_20083	DAP2	0.442925	0.250221	0.229965	0.35296	-0.0604746	0.745763	-0.0822784	0.833061	0.0462392	0.817822	0.998554	0.0789189
Kmarxianus_Y179_936	2	171248..174265	KLMA_20084	RPN1	0.406726	0.342175	0.0553772	0.897342	0.172349	0.502699	0.484279	0.271617	0.668378	0.0633929	1.26787	0.139142
Kmarxianus_Y179_937	2	complement(174508..175143)	KLMA_20085	VMA16	-0.731349	0.0628358	-0.308996	0.170702	-0.0102045	0.881481	-0.0362769	0.920604	-0.206646	0.568781	-0.0641695	0.961627
Kmarxianus_Y179_938	2	complement(175659..176732)	KLMA_20086	THR1	-0.410929	0.269997	0.277363	0.347219	-0.252995	0.239275	-0.169637	0.678961	0.161026	0.496042	0.414998	0.509777
Kmarxianus_Y179_939	2	177345..178811	KLMA_20087	MAS2	0.0201941	0.959292	0.390411	0.0851282	-0.171512	0.399996	-0.937539	0.0165993	-0.149602	0.707431	-0.765526	0.200995
Kmarxianus_Y179_940	2	complement(179027..184612)	KLMA_20088	MYO1	0.603658	0.153973	-0.184295	0.35061	0.142492	0.562562	0.0647003	0.784047	0.493157	0.0632833	0.90564	0.123593
Kmarxianus_Y179_941	2	185429..187381	KLMA_20089	_	0.0868489	0.71614	-0.133128	0.587091	-0.283144	0.238333	-0.158447	0.762486	0.382426	0.230485	0.750493	0.205135
Kmarxianus_Y179_942	2	188902..190083	KLMA_20090	YHR022C	0.651856	0.0597433	0.397521	0.0645952	0.266834	0.246465	0.82927	0.0168902	0.908357	0.00210035	-0.453217	0.471237
Kmarxianus_Y179_943	2	join(190717..190719,191303..191548)	KLMA_20091	RPS27B	-0.186374	0.75815	0.227899	0.467447	0.287198	0.25827	0.763823	0.0830975	-0.288936	0.477831	-1.57706	0.0381825
Kmarxianus_Y179_944	2	complement(191822..194020)	KLMA_20092	RSM22	0.762915	0.0255245	-0.387829	0.0742846	0.0555783	0.891424	-0.71564	0.0403278	-0.161951	0.676027	-0.602328	0.250736
Kmarxianus_Y179_945	2	<194406..195125	KLMA_20093	SRP102	-0.583293	0.122836	-0.286639	0.20009	0.112168	0.633995	-0.223504	0.534877	-0.281144	0.403446	0.624431	0.258245
Kmarxianus_Y179_946	2	complement(195227..195442)	_	YIL102C-A	0.339308	0.532317	-0.47281	0.335545	0.282371	0.603381	-0.462675	0.557546	0.382387	0.499872	-0.411139	0.643973
Kmarxianus_Y179_947	2	196050..200996	KLMA_20094	NUP192	0.445857	0.260221	-0.0960752	0.588956	0.315889	0.164327	-0.12201	0.705058	0.0880761	0.678516	0.970084	0.0973372
Kmarxianus_Y179_948	2	complement(201146..203488)	KLMA_20095	NSP1	0.367561	0.335647	0.0532423	0.886448	0.218583	0.333939	0.0126697	0.881137	0.180943	0.510252	0.327137	0.580524
Kmarxianus_Y179_949	2	complement(203897..208240)	KLMA_20096	MHP1	0.358124	0.432801	-0.485891	0.017327	-0.272888	0.215076	-0.809796	0.0602404	-0.159285	0.698302	-0.397996	0.611924
Kmarxianus_Y179_950	2	209109..210032	KLMA_20097	GYP6	0.107818	0.727589	-0.454537	0.0930183	0.242411	0.281184	-0.175891	0.75941	0.7315	0.0132638	0.400787	0.471307
Kmarxianus_Y179_951	2	complement(210292..211035)	KLMA_20098	GPM1	-0.57411	0.399409	-0.385065	0.0353759	0.599357	0.0296055	0.143441	0.699164	-0.534003	0.214972	-0.966234	0.281804
Kmarxianus_Y179_952	2	212936..213769	KLMA_20099	ADY2	-0.0273032	0.987402	0.64339	0.144084	-0.0973054	0.677877	1.53032	7.87015e-05	1.59274	8.48153e-07	1.83618	0.00131903
Kmarxianus_Y179_953	2	214408..215205	KLMA_20100	RVS161	-0.569217	0.157055	0.0913258	0.793628	-0.237524	0.315543	-0.521518	0.303304	-0.453748	0.270332	-0.954927	0.283675
Kmarxianus_Y179_954	2	216230..220012	KLMA_20101	_	0.367201	0.343523	0.0153852	0.970623	0.108151	0.676922	-0.402955	0.284371	0.236457	0.399075	0.055614	0.960593
Kmarxianus_Y179_955	2	complement(220841..222493)	KLMA_20102	SAT4	0.278339	0.420061	1.09113	2.36557e-06	0.0659818	0.807	0.000980841	0.961263	-0.248714	0.473178	-0.572198	0.389957
Kmarxianus_Y179_956	2	complement(224247..225353)	KLMA_10838	YAR009C	-1.13612	0.0927938	0.484838	0.463694	-1.29748	0.0303683	-1.07213	0.0906515	-0.533537	0.453144	-0.592258	0.612216
Kmarxianus_Y179_957	2	226657..228108	KLMA_20105	CIT1	-0.260348	0.567692	0.337125	0.25245	0.00719378	0.961956	-0.385956	0.442752	-0.300056	0.542578	-0.822517	0.383433
Kmarxianus_Y179_958	2	228928..229671	KLMA_20106	YCP4	-0.722962	0.0953165	-0.560817	0.0368294	-0.180054	0.412105	-0.49147	0.248062	-0.437482	0.244283	0.134565	0.783239
Kmarxianus_Y179_959	2	complement(229983..231725)	KLMA_20107	_	0.0876667	0.633898	-0.481343	0.0212074	0.345897	0.209106	0.806474	0.0453439	0.423089	0.189356	1.19937	0.0372492
Kmarxianus_Y179_960	2	complement(232142..232699)	KLMA_20108	MRPL32	-0.200604	0.513742	0.212804	0.344879	0.181004	0.429915	-0.6739	0.0593343	-0.285211	0.407362	-0.735115	0.187665
Kmarxianus_Y179_961	2	233266..234282	KLMA_20109	CDC10	-0.156551	0.73268	0.0797754	0.77573	0.158554	0.485893	-0.00561267	0.962872	-0.0300366	0.94698	0.755664	0.151919
Kmarxianus_Y179_962	2	complement(235802..238132)	KLMA_20110	DNM1	0.363983	0.298342	-0.010227	0.899008	0.0915172	0.70246	-0.485401	0.20987	0.0976244	0.653825	-0.174421	0.771301
Kmarxianus_Y179_963	2	complement(238638..239933)	KLMA_20111	RTT109	-0.202467	0.573033	0.0874994	0.780967	0.00751669	0.988027	1.00648	0.00303846	1.40982	2.01022e-06	2.24963	0.000187181
Kmarxianus_Y179_964	2	complement(<240230..240969)	KLMA_20112	PRE3	-0.394466	0.257221	-0.0388436	0.843265	-0.240761	0.267234	0.134047	0.678246	0.219464	0.396611	0.413724	0.455253
Kmarxianus_Y179_965	2	complement(241350..244382)	KLMA_20113	SFI1	-0.0190074	0.961651	-0.126586	0.539092	0.075472	0.771202	0.0813528	0.789017	0.274738	0.270431	0.710022	0.196649
Kmarxianus_Y179_966	2	244726..246108	KLMA_20114	OST1	-0.117939	0.776253	-0.0681515	0.729205	0.0170673	0.970788	0.296258	0.359778	0.196693	0.448629	1.26969	0.0232012
Kmarxianus_Y179_967	2	complement(246267..248198)	KLMA_20115	ORC3	0.146035	0.622099	-0.0893781	0.685632	0.0930645	0.781564	0.0828276	0.871701	0.266291	0.320711	0.981556	0.0780133
Kmarxianus_Y179_968	2	complement(248592..248948)	KLMA_20116	COX16	-0.212472	0.412002	0.192275	0.361508	-0.101273	0.635482	-0.813393	0.0349946	-0.648043	0.0633725	-2.75035	0.000251714
Kmarxianus_Y179_969	2	250394..254590	KLMA_20117	ADR1	-0.163579	0.715625	-0.00468028	0.929211	-0.148909	0.47353	-1.12653	0.00245818	-0.813233	0.0234107	-3.1219	0.000599164
Kmarxianus_Y179_970	2	complement(254940..257831)	KLMA_20118	RAD9	0.386261	0.256672	-0.0270456	0.866624	-0.111964	0.573972	0.37556	0.329147	0.656139	0.0365365	1.71747	0.00285725
Kmarxianus_Y179_971	2	<258704..>259432	KLMA_20119	ADY4	-0.440309	0.28388	0.333418	0.39077	-0.322203	0.231689	-0.181758	0.724182	0.0254613	0.862945	0.542504	0.361452
Kmarxianus_Y179_972	2	complement(<260038..261098)	KLMA_20120	SPR28	0.614803	0.128402	0.112087	0.839786	-0.175061	0.387272	2.05599	1.90268e-08	1.84181	3.12582e-09	2.23844	0.000116443
Kmarxianus_Y179_973	2	complement(261468..262673)	KLMA_20121	BUR2	0.143454	0.661519	0.227256	0.340201	-0.0145377	0.931207	-0.46576	0.197538	-0.282257	0.372282	-0.532102	0.389757
Kmarxianus_Y179_974	2	complement(263059..264477)	KLMA_20122	MFB1	0.0558259	0.798804	0.0699632	0.796004	-0.396819	0.0572062	-0.566589	0.117878	-0.0490202	0.951397	-0.836285	0.16715
Kmarxianus_Y179_975	2	265050..267077	KLMA_20123	GTB1	0.616817	0.123437	0.244759	0.319131	-0.035388	0.785183	-0.246197	0.531219	-0.129726	0.723398	-0.406312	0.508199
Kmarxianus_Y179_976	2	268115..269398	KLMA_20124	YDR222W	0.209058	0.444818	0.596162	0.0413848	-0.671088	0.0261646	-0.448292	0.314113	-0.634292	0.0302696	-1.61436	0.00449112
Kmarxianus_Y179_977	2	270008..273223	KLMA_20125	IFH1	1.12976	0.00982717	-0.654088	0.0034864	0.557224	0.0106346	0.372209	0.272006	0.159202	0.547634	-0.0220966	0.93705
Kmarxianus_Y179_978	2	273617..276094	KLMA_20126	UTP13	0.687029	0.0589379	-0.693952	0.00115729	0.895459	0.000230522	0.415182	0.189593	0.0353522	0.789382	-0.385361	0.482988
Kmarxianus_Y179_979	2	276374..276955	KLMA_20128	RSA3	0.29207	0.316952	0.344177	0.131036	0.960631	0.0017477	1.16998	0.00103009	0.136638	0.613117	-1.05314	0.0583047
Kmarxianus_Y179_980	2	complement(277160..278032)	KLMA_20129	CCC1	-0.103181	0.861578	-0.244251	0.278215	-0.266857	0.205513	-0.0228711	0.972998	-0.417231	0.233488	-0.161893	0.830329
Kmarxianus_Y179_981	2	complement(279531..280631)	KLMA_20130	ECM4	-1.01605	0.0257448	-0.284625	0.227939	-0.671034	0.00165706	-1.40221	0.00138756	-1.15693	0.00103881	-1.31278	0.0487375
Kmarxianus_Y179_982	2	complement(280987..281406)	KLMA_20131	_	-0.914904	0.0155232	-0.451043	0.0504974	-0.0179597	0.94378	-0.19497	0.684224	0.044342	0.82115	0.425273	0.477808
Kmarxianus_Y179_983	2	complement(281836..282588)	KLMA_20132	BMH2	-0.411692	0.438018	-0.23418	0.380512	-0.135934	0.579718	-0.597123	0.242807	-0.35097	0.414229	-0.491956	0.582874
Kmarxianus_Y179_984	2	complement(283963..284550)	_	_	_	_	_	_	_	_	_	_	_	_	_	_
Kmarxianus_Y179_985	2	complement(283963..284550)	_	_	_	_	_	_	_	_	_	_	_	_	_	_
Kmarxianus_Y179_986	2	complement(283963..284550)	_	_	_	_	_	_	_	_	_	_	_	_	_	_
Kmarxianus_Y179_987	2	complement(286032..286865)	_	_	_	_	_	_	_	_	_	_	_	_	_	_
Kmarxianus_Y179_988	2	complement(286032..286865)	_	_	_	_	_	_	_	_	_	_	_	_	_	_
Kmarxianus_Y179_989	2	287537..288130	KLMA_50423	TY2B-LR1	-0.331152	0.492945	0.0159002	0.971752	-0.876264	0.00325185	-1.16319	0.00585993	-0.922369	0.0108289	-0.484478	0.546323
Kmarxianus_Y179_990	2	288197..288625	KLMA_50423	TY2B-LR1	-0.590492	0.223637	0.206352	0.679216	-0.891228	0.00619697	-0.36354	0.447749	-0.940031	0.0140007	-0.401999	0.645086
Kmarxianus_Y179_991	2	complement(289165..293709)	KLMA_20133	IRC20	0.518892	0.241363	-0.356133	0.0779604	0.0599706	0.819404	-0.647611	0.0760621	-0.159188	0.653493	-0.380408	0.549253
Kmarxianus_Y179_992	2	294957..296588	KLMA_20135	RCK2	0.0222301	0.9035	-0.0768818	0.672068	-0.180272	0.331584	-0.215379	0.574484	-0.22214	0.508286	0.154937	0.78604
Kmarxianus_Y179_993	2	complement(296874..299270)	KLMA_20136	MEF2	0.686101	0.062064	-0.805588	0.00243365	0.358387	0.237696	-0.87491	0.0119258	-0.339599	0.311954	-0.35252	0.504539
Kmarxianus_Y179_994	2	299599..300528	KLMA_20137	GCN3	-0.231991	0.567263	-0.190702	0.318898	0.423051	0.146029	0.119563	0.754189	-0.230328	0.447279	0.000161804	0.99388
Kmarxianus_Y179_995	2	complement(300595..301359)	KLMA_20138	RPC37	0.189767	0.503455	-0.330962	0.101364	1.16643	0.000174922	0.923763	0.0168238	-0.186583	0.612693	-0.742462	0.206358
Kmarxianus_Y179_996	2	301906..304116	KLMA_20139	DBP7	0.659506	0.0429675	-0.710618	0.00129733	1.09577	0.000472034	0.810531	0.0421451	0.0567161	0.775822	-0.258453	0.635521
Kmarxianus_Y179_997	2	304453..306249	KLMA_20140	GSM1	-0.407612	0.335976	-0.237015	0.518063	-0.324751	0.245235	-0.25313	0.523911	0.29383	0.275479	-0.695138	0.249826
Kmarxianus_Y179_998	2	complement(306395..307891)	KLMA_20141	YKR023W	0.301987	0.354013	0.09072	0.740016	-0.00156858	1	-0.321275	0.398148	-0.285977	0.365628	-0.102262	0.905052
Kmarxianus_Y179_999	2	complement(309045..309458)	KLMA_20143	PAM16	0.0928751	0.700824	0.230524	0.340579	0.174438	0.52588	-0.660299	0.0670087	-0.358093	0.273385	-2.26281	0.000346879
Kmarxianus_Y179_1000	2	310260..312116	KLMA_20144	_	0.663424	0.166224	0.431647	0.0907688	-0.438411	0.0329015	-0.208854	0.575003	-0.131345	0.772813	-1.44532	0.0590436
Kmarxianus_Y179_1001	2	complement(312586..313758)	KLMA_20145	CTF13	-0.586053	0.159634	-0.32474	0.236652	0.271399	0.518953	0.0970257	0.863651	0.285717	0.383695	1.44744	0.0263016
Kmarxianus_Y179_1002	2	313765..315066	KLMA_20146	SLD2	-0.273419	0.537546	-0.310213	0.209763	0.51945	0.133664	0.824847	0.0645803	0.168917	0.587766	1.28714	0.032632
Kmarxianus_Y179_1003	2	complement(315184..316746)	KLMA_20147	UTP15	0.173973	0.496606	-0.387987	0.0608157	0.860861	0.0012463	0.784679	0.0278248	0.0131406	0.856169	0.0917771	0.957979
Kmarxianus_Y179_1004	2	317366..319234	KLMA_20148	AIP1	-0.00860221	0.931593	-0.0780884	0.667908	0.116618	0.646894	0.269893	0.416739	0.579625	0.034269	1.44584	0.0104755
Kmarxianus_Y179_1005	2	319617..320903	KLMA_20149	NPL6	0.555073	0.110978	0.168246	0.556264	0.0828669	0.736117	0.560301	0.0939826	0.782472	0.0069843	1.16511	0.0385842
Kmarxianus_Y179_1006	2	321291..323816	KLMA_20150	YTA12	0.726463	0.0677896	0.307126	0.233811	0.078659	0.751325	-0.55403	0.229313	0.136866	0.616311	-0.656601	0.420689
Kmarxianus_Y179_1007	2	324314..326011	KLMA_20151	VBA1	0.408016	0.193663	0.30532	0.183836	-0.800938	0.000119595	-0.291052	0.425756	-0.0782447	0.819024	-0.0757534	0.842242
Kmarxianus_Y179_1008	2	complement(326085..326837)	KLMA_20152	YMR087W	-1.0976	0.00223587	0.0684192	0.840189	-0.0803104	0.743079	0.831089	0.0963841	0.425756	0.335358	0.867574	0.134474
Kmarxianus_Y179_1009	2	327296..328582	KLMA_20153	AAT1	-0.507417	0.187595	0.0113803	0.954667	-0.224789	0.348539	-0.371474	0.328436	-0.255277	0.480228	0.381887	0.496327
Kmarxianus_Y179_1010	2	complement(328693..331674)	KLMA_20154	_	0.707209	0.115249	-0.153411	0.464831	-0.241278	0.296836	-0.40995	0.305081	-0.426408	0.208762	-0.391963	0.624972
Kmarxianus_Y179_1011	2	complement(332390..334510)	KLMA_20155	GFA1	0.418817	0.301038	-0.272295	0.318123	0.411693	0.0981527	0.632639	0.119367	-0.297241	0.4103	-0.432708	0.6335
Kmarxianus_Y179_1012	2	complement(335261..336832)	KLMA_20156	LAP4	0.129503	0.706858	-0.148603	0.523341	-0.0990564	0.640244	-0.665929	0.139083	-0.237986	0.544576	0.319819	0.589693
Kmarxianus_Y179_1013	2	337869..341780	KLMA_20157	HSL1	0.429417	0.289878	-0.328232	0.139142	0.236515	0.27597	0.145412	0.691672	0.668707	0.0111821	1.19157	0.0392917
Kmarxianus_Y179_1014	2	complement(342125..343264)	KLMA_20158	ADH4b	0.0438993	0.933664	-1.73549	1.56538e-12	-0.000453199	0.90988	-1.21467	0.0185001	-0.911557	0.0308655	-2.08904	0.0382748
Kmarxianus_Y179_1015	2	complement(344745..345497)	KLMA_20159	UTP11	0.627196	0.0703365	-0.469524	0.0213082	0.566294	0.0774304	-0.403569	0.274498	-0.544261	0.0723165	-1.7371	0.00288474
Kmarxianus_Y179_1016	2	345913..346800	KLMA_20160	MTC2	-0.543379	0.227161	-0.928391	0.00127178	0.0335283	1	-0.0405476	0.974087	0.306579	0.260088	0.236207	0.611432
Kmarxianus_Y179_1017	2	complement(346929..347831)	KLMA_20161	GGC1	-0.236051	0.579162	0.37486	0.106588	-0.346517	0.0761071	-1.27506	0.00203098	-0.108609	0.831198	-1.13707	0.0430662
Kmarxianus_Y179_1018	2	348406..350268	KLMA_20162	PCF11	0.255762	0.357331	0.290625	0.249342	0.259127	0.311363	0.917306	0.0143625	0.892235	0.00452379	1.10891	0.0524134
Kmarxianus_Y179_1019	2	complement(350528..354061)	KLMA_20163	SIR4	0.407418	0.258663	-0.0709745	0.685997	0.0854827	0.739381	-0.301269	0.460924	0.290167	0.277774	0.406718	0.441034
Kmarxianus_Y179_1020	2	complement(354733..357213)	KLMA_20164	_	0.263498	0.540658	-0.358624	0.231625	-0.225427	0.447357	0.10937	0.809598	0.620678	0.101466	1.05169	0.078567
Kmarxianus_Y179_1021	2	complement(357509..358477)	_	RPI1	0.303572	0.412685	0.424318	0.135699	-0.242514	0.347965	-1.18197	0.00412817	-1.41068	3.48457e-06	-2.80371	3.62064e-06
Kmarxianus_Y179_1022	2	complement(361624..362307)	KLMA_20165	ADK1	-0.740611	0.0737345	-0.179689	0.509236	0.342636	0.150506	-0.4598	0.305507	-0.230594	0.58298	-0.612273	0.370979
Kmarxianus_Y179_1023	2	362709..363188	_	_	-0.0136947	0.799418	-0.0257304	1	-0.743749	0.253567	-0.936269	0.297275	-0.199849	0.843688	-2.4349	0.00185817
Kmarxianus_Y179_1024	2	363403..365550	KLMA_20166	MSC3	0.335961	0.404058	0.163318	0.532247	-0.214189	0.362595	-0.687335	0.119781	0.00273023	0.931922	-0.857563	0.297315
Kmarxianus_Y179_1025	2	complement(365977..366369)	KLMA_60119	HTA1	-0.898301	0.0110122	-0.00773824	0.944853	-0.309489	0.103058	-0.0102103	1	-0.326442	0.373749	-1.6455	0.0276574
Kmarxianus_Y179_1026	2	367077..367475	KLMA_20169	HTB1	-0.74041	0.0567956	0.242637	0.414924	-0.175896	0.359564	0.322975	0.451295	-0.207803	0.602791	-0.890637	0.249671
Kmarxianus_Y179_1027	2	367810..371172	KLMA_20170	SPO71	0.661794	0.0656953	0.276193	0.235317	-0.204508	0.268521	-0.16714	0.689518	0.0729584	0.704789	0.102484	0.873121
Kmarxianus_Y179_1028	2	complement(371167..373458)	KLMA_20171	STE5	0.143391	0.666545	0.491293	0.0757526	-0.605601	0.0105843	-0.735097	0.0349921	-0.484843	0.112983	-0.588646	0.330574
Kmarxianus_Y179_1029	2	complement(374690..375931)	KLMA_20172	PDA1	0.511135	0.216787	1.03586	0.000349909	-0.126767	0.534985	-0.627961	0.173636	-0.51694	0.185865	0.518105	0.478144
Kmarxianus_Y179_1030	2	376800..378515	KLMA_20173	ARX1	0.803958	0.0348662	-0.257443	0.177703	0.716279	0.0125994	0.892613	0.0136839	0.385117	0.169607	0.60476	0.317141
Kmarxianus_Y179_1031	2	<379034..380014	KLMA_20174	DMC1	0.516197	0.256327	0.0725575	0.885581	-0.0731303	0.736812	0.66616	0.163965	-0.192683	0.661515	-0.0423012	0.967249
Kmarxianus_Y179_1032	2	complement(380082..381491)	KLMA_20175	TMS1	-0.360705	0.344336	-0.00309076	0.92673	-0.241417	0.272736	-0.775824	0.0300275	-0.376864	0.229913	-1.10147	0.0630182
Kmarxianus_Y179_1033	2	381709..382485	KLMA_20176	_	-0.579852	0.0957898	-0.141778	0.567678	-0.265538	0.259766	1.38368	0.00175824	0.689196	0.0633159	0.832629	0.152345
Kmarxianus_Y179_1034	2	complement(382591..383502)	KLMA_20177	ISC10	-0.400397	0.284944	0.109929	0.714639	-0.199291	0.296212	1.05617	0.00428041	0.710537	0.0252372	1.42636	0.0135043
Kmarxianus_Y179_1035	2	complement(383726..383929)	KLMA_20178	SLO1	-0.240607	0.632889	0.0415024	1	-0.190728	0.411239	0.531133	0.262194	0.0658623	0.857843	0.315319	0.550914
Kmarxianus_Y179_1036	2	384680..387502	KLMA_20179	RDH54	0.174928	0.623039	-0.0363361	0.874575	-0.0495749	0.842151	-0.25732	0.61883	-0.269206	0.547801	0.258908	0.584438
Kmarxianus_Y179_1037	2	complement(387557..389455)	KLMA_20180	VMS1	0.166757	0.573995	0.240028	0.310171	0.036166	0.931257	0.328226	0.363816	0.249012	0.377044	1.23633	0.0301658
Kmarxianus_Y179_1038	2	complement(389805..390914)	KLMA_20181	HEM12	-0.122448	0.725898	0.719889	0.00499062	-0.0213003	0.825884	-0.677566	0.100169	0.0680575	0.715524	-0.118909	0.820097
Kmarxianus_Y179_1039	2	392118..394883	KLMA_20182	PFF1	0.0886066	0.781323	-0.211509	0.320487	-0.158229	0.398132	0.00151286	0.999921	-0.154626	0.711723	-0.494271	0.410913
Kmarxianus_Y179_1040	2	complement(395116..397473)	KLMA_20183	_	0.406797	0.341944	-0.586736	0.00382182	0.105405	0.659949	0.450038	0.218296	0.521073	0.0745585	0.550211	0.362967
Kmarxianus_Y179_1041	2	complement(399918..402953)	KLMA_20184	DSE4	0.658676	0.110694	-0.587751	0.00870079	0.20111	0.450459	0.34729	0.293006	1.86789	1.00663e-10	1.46593	0.0112575
Kmarxianus_Y179_1042	2	405204..405779	_	_	-0.211001	0.470767	-0.342876	0.343169	-0.201535	0.669997	-0.59518	0.246598	-0.385922	0.3525	-2.41047	0.000202217
Kmarxianus_Y179_1043	2	409437..410654	KLMA_20186	CMR3	0.222583	0.56611	-1.41207	2.70866e-05	0.488701	0.250407	-0.635435	0.107138	-0.276248	0.430783	-1.19409	0.035879
Kmarxianus_Y179_1044	2	complement(412067..414028)	KLMA_20187	DBF4	0.381385	0.325573	0.0948141	0.770448	0.0715462	0.764234	-0.107113	0.755162	0.105694	0.607468	0.387209	0.453609
Kmarxianus_Y179_1045	2	complement(414391..414810)	KLMA_20188	SLM4	-0.784989	0.0130173	-0.265872	0.19326	-0.495342	0.0392318	0.522224	0.179653	0.270307	0.403887	0.351915	0.522783
Kmarxianus_Y179_1046	2	415613..417409	KLMA_20189	RGP1	-0.0411629	0.96492	0.203429	0.38061	-0.272876	0.172148	-0.116885	0.711733	0.0626126	0.752104	0.645339	0.239036
Kmarxianus_Y179_1047	2	complement(417513..419225)	KLMA_20190	AVL9	-0.0809834	0.869934	0.104172	0.679212	-0.0717916	0.697139	-0.381472	0.28033	-1.06565	0.000239026	-1.51351	0.016868
Kmarxianus_Y179_1048	2	419714..421942	KLMA_20191	HPR1	0.148976	0.600887	0.112865	0.644165	0.119762	0.607184	0.292447	0.402353	-0.916426	0.000941131	-1.10303	0.0711038
Kmarxianus_Y179_1049	2	422253..423587	KLMA_20192	NOP53	0.552675	0.0984163	-0.340425	0.0856848	0.880834	0.00247993	0.729849	0.0740186	-0.0709009	0.873469	0.105713	0.902532
Kmarxianus_Y179_1050	2	complement(423786..426320)	KLMA_20193	PXA1	1.11106	0.0177208	0.324558	0.553927	0.0330585	1	0.087633	0.802504	0.129225	0.638625	-0.507228	0.375555
Kmarxianus_Y179_1051	2	426985..427848	KLMA_20194	_	-0.633403	0.0767422	-0.526019	0.0402605	-0.12054	0.64946	-0.618994	0.0822935	-0.860291	0.00546782	0.882683	0.112168
Kmarxianus_Y179_1052	2	428165..428836	KLMA_20195	ppr1	0.0235328	0.886825	0.227125	0.279818	-0.250214	0.201825	0.500689	0.156494	0.754014	0.0101857	1.00228	0.0696762
Kmarxianus_Y179_1053	2	428866..429489	KLMA_20196	ABP140	0.209454	0.629788	0.0116404	0.978424	0.570664	0.227737	0.4651	0.42432	0.565659	0.27449	0.845669	0.25247
Kmarxianus_Y179_1054	2	430395..431480	KLMA_20196	ABP140	-0.122505	0.849371	0.00813192	0.956136	0.291062	0.273125	0.350746	0.327558	0.158388	0.52685	0.371029	0.500976
Kmarxianus_Y179_1055	2	complement(431520..432335)	KLMA_20199	ATG5	-0.346654	0.294455	0.0581239	0.938888	-0.386637	0.277559	-0.772052	0.105523	-0.28982	0.548006	0.261186	0.696646
Kmarxianus_Y179_1056	2	432558..434081	KLMA_20200	_	0.0179366	0.927072	-0.200041	0.551132	-0.163678	0.563223	-0.61067	0.102263	-0.551003	0.107649	-1.14226	0.0485439
Kmarxianus_Y179_1057	2	complement(434140..436683)	KLMA_20201	YPL150W	0.494888	0.187934	0.108047	0.697934	0.0427265	0.905208	-0.0596576	0.892325	-0.323313	0.283992	-0.309803	0.639535
Kmarxianus_Y179_1058	2	437423..438913	KLMA_20202	MET7	-0.199763	0.671203	-0.158771	0.422598	-0.0271356	0.833298	0.396808	0.256111	0.638185	0.0408581	0.65894	0.227453
Kmarxianus_Y179_1059	2	complement(438994..440133)	KLMA_20203	SSP2	-0.071309	0.991333	0.00494129	1	-1.21321	0.00345112	-1.71695	0.00101224	-1.24508	0.00603231	-2.15251	0.00197358
Kmarxianus_Y179_1060	2	complement(440686..442716)	KLMA_20204	PUS7	0.234415	0.433346	-0.402772	0.0473988	0.99392	0.000651628	0.403136	0.282008	-0.0472301	0.956366	-0.00488316	0.945199
Kmarxianus_Y179_1061	2	442999..444282	KLMA_20205	PRP46	-0.00138787	0.966049	0.0205311	0.967158	-0.160167	0.439013	0.410835	0.262596	-0.244565	0.532973	0.718404	0.258737
Kmarxianus_Y179_1062	2	444626..445942	KLMA_20206	ESA1	-0.304167	0.387264	0.204927	0.377301	0.134541	0.650309	0.541436	0.149802	0.130855	0.622674	0.544582	0.31639
Kmarxianus_Y179_1063	2	complement(445992..447083)	KLMA_20207	RRD2	-0.562919	0.108762	-0.0995121	0.615573	-0.54801	0.00710277	-0.462366	0.175934	-0.277833	0.406777	-0.452852	0.476609
Kmarxianus_Y179_1064	2	complement(447429..448691)	KLMA_20208	DGA1	-0.487995	0.24592	0.00737466	0.943378	-0.201229	0.287381	-0.178882	0.626415	-0.360011	0.277711	0.148477	0.719681
Kmarxianus_Y179_1065	2	449598..452021	KLMA_20209	RAD53	-0.208275	0.672345	-0.230948	0.22334	-0.0485931	0.808171	0.230538	0.608463	0.132872	0.626706	1.62391	0.00752284
Kmarxianus_Y179_1066	2	complement(452211..453089)	KLMA_20210	SLD5	-0.310172	0.356873	0.145746	0.635033	0.0587751	0.925166	0.884357	0.0790927	0.422085	0.243908	1.38019	0.0276646
Kmarxianus_Y179_1067	2	453355..455061	KLMA_20211	PAC11	-0.156385	0.771424	0.276556	0.339846	-0.373162	0.243703	-0.460296	0.333252	-0.100989	0.916985	1.27926	0.0504613
Kmarxianus_Y179_1068	2	complement(455144..456955)	KLMA_60256	ESBP6	1.92642	2.43238e-07	1.08945	0.000300537	0.00881707	0.988093	0.128951	0.769824	-1.53586	9.11404e-07	-2.46784	1.5831e-05
Kmarxianus_Y179_1069	2	458231..459301	KLMA_20212	HST2	0.559442	0.153273	-0.253432	0.287218	-0.0303253	0.899185	-1.00309	0.0264185	-0.521026	0.19441	-0.450981	0.539534
Kmarxianus_Y179_1070	2	459298..461955	KLMA_20213	MSH4	0.266451	0.490634	-0.1624	0.421333	-0.0606248	0.685731	0.0547441	0.871428	0.14087	0.515546	0.853756	0.118965
Kmarxianus_Y179_1071	2	complement(462016..463683)	KLMA_20214	ULP1	0.0785785	0.765844	-0.0813293	0.606006	-0.0702963	0.68266	0.521133	0.143876	0.611554	0.0228737	1.43297	0.0106243
Kmarxianus_Y179_1072	2	464298..466673	KLMA_20215	BAS1	0.971136	0.00850562	-0.204176	0.285467	0.294883	0.25582	0.495167	0.147494	0.0772895	0.706025	-0.9411	0.122878
Kmarxianus_Y179_1073	2	complement(466821..>467033)	KLMA_20216	YIL156W-B	-0.913601	0.00708838	0.251265	0.25848	-0.393805	0.0746873	-0.145628	0.691596	-0.123271	0.785711	-0.300875	0.656255
Kmarxianus_Y179_1074	2	467471..468013	KLMA_20217	COA1	-0.416615	0.195505	0.162051	0.463152	-0.156635	0.475556	-0.991705	0.0118313	-0.523775	0.10972	-1.38596	0.0313345
Kmarxianus_Y179_1075	2	complement(468249..469313)	KLMA_20218	SKG1	0.222979	0.505987	-0.287392	0.169132	0.0907031	0.700591	0.170979	0.549585	0.159128	0.537545	0.135828	0.785885
Kmarxianus_Y179_1076	2	complement(469904..473851)	KLMA_20219	BNR1	0.848199	0.0708712	0.0274355	0.950329	0.440898	0.129197	-0.114022	0.786609	0.25618	0.323331	0.836284	0.132829
Kmarxianus_Y179_1077	2	474757..475992	KLMA_20220	POT1	0.311471	0.561406	0.0660652	0.969916	0.220821	0.556599	0.986745	0.0162004	0.495816	0.10529	1.05814	0.0629053
Kmarxianus_Y179_1078	2	complement(476069..476665)	_	YIL161W	-0.573928	0.222334	0.0550491	0.952615	0.147378	0.738355	-0.359065	0.468968	-0.243999	0.611863	-0.510483	0.391891
Kmarxianus_Y179_1079	2	477583..479247	KLMA_20221	THI72	0.290427	0.338644	0.975489	0.000294184	-0.270096	0.302521	0.743359	0.115835	0.665802	0.0604157	0.963013	0.109624
Kmarxianus_Y179_1080	2	complement(480045..482033)	KLMA_20222	_	0.335009	0.291479	0.646807	0.0038476	0.0670383	0.885005	-0.536676	0.176289	0.152076	0.558439	0.28241	0.586981
Kmarxianus_Y179_1081	2	484168..485526	KLMA_20223	DSD1	0.44037	0.255899	0.586653	0.018418	-0.300944	0.144431	0.0474586	0.91151	0.0712394	0.733044	-0.144752	0.831399
Kmarxianus_Y179_1082	2	486050..487693	KLMA_20224	CDC20	0.17368	0.535397	-0.198812	0.334884	-0.00331545	0.930764	0.521737	0.137868	1.13361	9.2126e-05	1.63001	0.00439
Kmarxianus_Y179_1083	2	488647..489636	KLMA_20225	SNF4	-0.44604	0.289192	-0.167794	0.405632	-0.105237	0.582601	0.131565	0.668797	0.221529	0.361783	0.938262	0.101994
Kmarxianus_Y179_1084	2	490240..492495	KLMA_20226	YGL114W	0.199402	0.578861	0.389115	0.10131	-0.216343	0.245753	-0.0582341	0.898635	0.289064	0.261049	0.584515	0.291205
Kmarxianus_Y179_1085	2	complement(492568..493515)	KLMA_20227	SWC5	0.146411	0.77206	0.539105	0.0373594	0.0129981	0.991226	-0.0108875	0.952911	-0.0458264	0.906414	-0.357328	0.543898
Kmarxianus_Y179_1086	2	493808..495055	KLMA_20228	PBP2	-0.232934	0.529693	-0.106658	0.619489	-0.40279	0.0526325	0.543461	0.145725	0.652683	0.049672	0.665788	0.23181
Kmarxianus_Y179_1087	2	495414..497303	KLMA_20229	SLD3	0.262166	0.382345	0.244569	0.33144	0.178954	0.538035	0.639717	0.14113	0.232315	0.425831	0.817904	0.145537
Kmarxianus_Y179_1088	2	complement(497404..498966)	KLMA_20230	TAF6	-0.205609	0.62055	-0.025875	0.850933	0.175747	0.440842	0.644639	0.0544664	0.518916	0.0533161	0.989874	0.0827875
Kmarxianus_Y179_1089	2	499264..499512	KLMA_20231	DAD3	-0.766113	0.0365986	0.11626	0.803813	0.47329	0.304071	0.734935	0.218211	-0.0873508	0.941787	1.07444	0.175695
Kmarxianus_Y179_1090	2	complement(499604..500725)	KLMA_20232	ARC40	-0.349136	0.431084	-0.084964	0.691077	0.00676889	0.980195	-0.0881794	0.847526	-0.289355	0.417209	0.334309	0.51744
Kmarxianus_Y179_1091	2	501302..502600	KLMA_20233	NSA1	0.191622	0.479946	-0.0502869	0.726762	0.466326	0.112373	0.190527	0.538652	-0.0868588	0.875865	-0.224664	0.635603
Kmarxianus_Y179_1092	2	complement(502673..504604)	KLMA_20234	CUE3	0.295927	0.368209	0.0801204	0.704114	-0.120506	0.553876	0.0245435	0.956271	0.120904	0.58812	0.672688	0.227314
Kmarxianus_Y179_1093	2	504838..508116	KLMA_20235	VHC1	0.0323133	0.892899	-0.219904	0.252064	-0.103965	0.551449	0.195913	0.539555	0.415115	0.107604	0.450898	0.394052
Kmarxianus_Y179_1094	2	complement(508251..509513)	KLMA_20236	ABD1	-0.0936751	0.864646	0.0660757	0.856917	-0.184094	0.367587	-0.11147	0.783834	-0.0533066	0.93739	-0.710241	0.21572
Kmarxianus_Y179_1095	2	509996..512449	KLMA_20237	PRP5	0.323792	0.333708	0.0155874	0.969195	-0.26528	0.183854	-0.0594931	0.873756	-0.109308	0.81344	0.348847	0.490373
Kmarxianus_Y179_1096	2	complement(512475..512789)	KLMA_20238	YGL108C	-0.592283	0.0748774	-0.12543	0.495097	-0.0957816	0.762036	-0.412141	0.280272	-0.508528	0.101928	-0.283417	0.74166
Kmarxianus_Y179_1097	2	complement(513350..515398)	KLMA_20239	RMD9	0.296015	0.489495	0.226598	0.468726	0.278971	0.295989	0.0908451	0.80168	-0.233588	0.588496	-0.492545	0.533079
Kmarxianus_Y179_1098	2	516584..517012	KLMA_20240	MLC1	-0.342582	0.353651	0.0947456	0.754801	0.239516	0.248475	-0.0115461	1	-0.189078	0.63174	0.178545	0.694357
Kmarxianus_Y179_1099	2	complement(517061..518563)	KLMA_20241	ERT1	-0.0898685	0.880726	0.776469	0.00041537	-0.343125	0.0919415	-0.206293	0.58311	-0.176548	0.633601	-1.62067	0.00928436
Kmarxianus_Y179_1100	2	519259..520392	KLMA_20242	ARC1	-0.174408	0.735535	0.121151	0.724633	0.213164	0.369802	-0.328235	0.416964	-0.198672	0.599996	-0.0516734	0.951507
Kmarxianus_Y179_1101	2	complement(520558..521658)	KLMA_40204	UME6	-0.07093	0.994076	0.758197	0.0106389	0.973713	4.99919e-05	1.43281	3.36532e-05	1.64177	9.2419e-09	1.62745	0.00437194
Kmarxianus_Y179_1102	2	522271..522720	KLMA_20243	TRX3	-0.836265	0.0146712	-0.026418	0.83487	0.00820479	0.986107	0.12977	0.660768	-0.152574	0.685308	-0.421711	0.549473
Kmarxianus_Y179_1103	2	522997..523815	_	YNR040W	-0.645132	0.110208	-0.44563	0.0555233	0.522842	0.174951	-0.898049	0.0153197	-0.42825	0.195008	-0.779941	0.196503
Kmarxianus_Y179_1104	2	complement(523917..525041)	KLMA_20244	COQ2	-0.0141164	0.932185	0.217727	0.385862	0.329098	0.182282	0.407455	0.24159	0.737153	0.0129997	0.82145	0.144774
Kmarxianus_Y179_1105	2	join(525731..526324,526653..526787)	KLMA_20246	MVD1	-0.459753	0.316613	-0.759343	0.00448201	0.391573	0.0712114	0.632771	0.0586786	0.0103392	0.881324	0.526943	0.367114
Kmarxianus_Y179_1106	2	complement(527500..529581)	KLMA_20247	TUP1	0.08832	0.730252	-0.0620824	0.737546	0.129158	0.588509	0.0712967	0.846679	0.0165292	0.894911	0.702159	0.262564
Kmarxianus_Y179_1107	2	530177..530707	KLMA_20248	CSM1	0.0326974	0.821056	-0.197077	0.384111	-0.142405	0.533451	0.429654	0.281918	0.0804992	0.731417	0.473607	0.386205
Kmarxianus_Y179_1108	2	complement(530778..531239)	KLMA_20249	YCR087C-A	0.142394	0.87896	0.583789	0.0243052	1.12302	0.00174792	0.708199	0.0921821	-0.0587152	0.967899	-1.38387	0.0123718
Kmarxianus_Y179_1109	2	532055..533908	KLMA_20250	ABP1	0.327638	0.418452	0.0874081	0.794127	-0.0564742	0.752962	-0.0580045	0.899896	-0.337585	0.3764	0.545157	0.394344
Kmarxianus_Y179_1110	2	complement(534038..534598)	KLMA_20251	YCR090C	-0.658976	0.0467829	-0.080981	0.711575	0.0355538	0.924204	0.279151	0.430726	-0.220658	0.584889	-0.525181	0.380771
Kmarxianus_Y179_1111	2	534997..536292	KLMA_20252	YMD8	0.270703	0.400733	-0.00620806	0.914546	0.134599	0.605506	1.32293	0.000442566	1.2282	0.000112454	1.59801	0.00482506
Kmarxianus_Y179_1112	2	537067..538779	KLMA_20253	STP2	0.00381715	0.919451	-0.168465	0.414514	0.034557	0.886293	-0.391029	0.351305	-0.203693	0.629655	-0.642278	0.420365
Kmarxianus_Y179_1113	2	539576..542710	KLMA_20254	MCM6	0.464495	0.312062	-0.140678	0.442259	0.133874	0.597942	0.0368929	0.881694	0.082323	0.689651	0.671368	0.230985
Kmarxianus_Y179_1114	2	543503..546214	KLMA_20256	GPH1	-1.62881	6.52191e-05	-1.5335	2.10551e-11	-0.651013	0.00954117	-1.1865	0.0195059	-0.995628	0.0160572	-0.377079	0.695217
Kmarxianus_Y179_1115	2	547522..549108	KLMA_20258	JEN1	0.27659	0.467287	-0.364609	0.197915	0.0253974	0.952943	-1.43461	0.00333324	-0.998252	0.0106459	-2.67912	0.00153496
Kmarxianus_Y179_1116	2	complement(549333..550826)	KLMA_20259	ARO8	1.00136	0.0130227	0.682758	0.0070318	0.289463	0.234788	-0.922903	0.051162	-0.584116	0.131784	-0.710718	0.321957
Kmarxianus_Y179_1117	2	552028..553914	KLMA_20260	KEX1	0.55017	0.130861	0.313658	0.174385	0.120972	0.61576	0.281271	0.407573	-0.146781	0.698712	-0.397396	0.554967
Kmarxianus_Y179_1118	2	complement(554003..554812)	KLMA_20261	_	-0.261921	0.526236	0.105772	0.805302	-0.0780391	0.82763	1.24779	0.0270145	-0.00568516	0.947916	0.266105	0.61742
Kmarxianus_Y179_1119	2	complement(555848..556672)	KLMA_20262	CHO1	0.310156	0.367467	-0.0991291	0.621815	0.0343495	0.893895	-0.431703	0.295644	-0.533736	0.114268	-0.389765	0.596902
Kmarxianus_Y179_1120	2	complement(557321..559528)	KLMA_20263	POX1	-0.979629	0.0139487	0.0869539	0.871202	-0.1963	0.554519	-1.07685	0.00664509	-0.947869	0.00324161	-1.6847	0.00520214
Kmarxianus_Y179_1121	2	560869..565833	KLMA_20264	CHC1	0.372873	0.428229	-0.225409	0.398727	0.0463657	0.906553	-0.0624733	0.9098	0.45788	0.167838	1.47082	0.0551986
Kmarxianus_Y179_1122	2	complement(566046..569141)	KLMA_20265	SPT16	0.251266	0.504788	0.251247	0.359155	0.144532	0.55686	0.0770303	0.801557	0.30884	0.231267	1.34435	0.0175691
Kmarxianus_Y179_1123	2	569531..570409	KLMA_20266	_	-0.166648	0.7537	0.0224676	0.960595	0.18926	0.522458	0.170714	0.721563	0.0925443	0.683292	1.20746	0.0374681
Kmarxianus_Y179_1124	2	570856..572448	KLMA_20267	NAB2	0.0957474	0.77796	0.621403	0.0146176	0.115654	0.601805	0.151234	0.682854	0.211193	0.498716	-0.248455	0.756681
Kmarxianus_Y179_1125	2	complement(572934..573707)	KLMA_20268	RPS2	-0.447973	0.410192	0.501603	0.0833735	0.55582	0.0301022	0.819223	0.0709277	-0.192912	0.668057	-1.14859	0.12616
Kmarxianus_Y179_1126	2	<575048..575512	KLMA_20269	OM14	-0.978263	0.0106461	0.220687	0.35027	-1.33525	3.88666e-10	-1.83936	0.000233595	-1.47862	0.000238796	-2.62067	0.00267182
Kmarxianus_Y179_1127	2	575930..577564	KLMA_20270	MON1	0.125534	0.788295	-0.0234895	0.871388	-0.108727	0.592799	-0.604689	0.107167	0.147391	0.585025	0.53397	0.316039
Kmarxianus_Y179_1128	2	complement(577507..578268)	KLMA_20271	GAT2	0.291576	0.565457	-0.264375	0.44617	-0.089165	0.702561	0.404429	0.303276	0.761449	0.0325201	1.11158	0.047867
Kmarxianus_Y179_1129	2	578911..581574	KLMA_20272	ROT2	0.224065	0.498428	-0.0880462	0.629286	-0.211762	0.307189	0.136436	0.697217	-0.547841	0.109484	-0.224225	0.749149
Kmarxianus_Y179_1130	2	complement(581622..582485)	KLMA_20273	SLX1	-0.00942993	0.943396	0.618736	0.0202371	-0.0286379	0.837459	0.632583	0.188941	0.279595	0.347596	0.811363	0.128685
Kmarxianus_Y179_1131	2	582851..>584368	KLMA_20274	MCX1	0.138249	0.66861	0.473955	0.0325285	-0.182032	0.356887	-0.719183	0.0395019	0.198379	0.408075	0.0109118	0.969107
Kmarxianus_Y179_1132	2	complement(584509..586371)	KLMA_20275	YBR225W	0.053733	0.841293	-0.789414	0.000162244	-0.121004	0.513584	-0.105108	0.822293	-0.0475812	0.953458	-0.620647	0.370083
Kmarxianus_Y179_1133	2	complement(587382..589235)	KLMA_20276	MET13	0.736073	0.0379001	0.2967	0.252089	0.0578993	0.788916	-0.270277	0.492599	0.102413	0.682692	-0.149857	0.84514
Kmarxianus_Y179_1134	2	590119..591597	KLMA_20277	TDP1	1.30644	0.00636831	-0.322089	0.226997	0.304013	0.28549	-0.147031	0.773112	0.185893	0.509709	0.63364	0.237825
Kmarxianus_Y179_1135	2	592132..593193	KLMA_20278	PDB1	0.34865	0.389091	1.14036	0.000117403	0.14457	0.591989	-0.848846	0.0526996	-0.765528	0.0417026	0.638735	0.339108
Kmarxianus_Y179_1136	2	594630..596183	KLMA_20279	YBR220C	0.158241	0.597152	0.0716258	0.827029	-0.0567786	0.753893	0.201242	0.523949	0.565334	0.0361382	0.908562	0.103535
Kmarxianus_Y179_1137	2	597025..599418	KLMA_20280	YRM1	0.369983	0.33468	0.188373	0.489134	0.0921473	0.762384	0.422255	0.369018	0.134654	0.697564	0.432071	0.624851
Kmarxianus_Y179_1138	2	complement(599588..600592)	KLMA_20281	SCS3	-0.597589	0.086693	-0.131207	0.473056	-0.16956	0.403207	-0.0928138	0.778932	0.0566849	0.739546	0.509057	0.368463
Kmarxianus_Y179_1139	2	complement(601642..603366)	KLMA_20282	HSP60	0.199987	0.579371	0.527659	0.0534662	0.457049	0.0723477	0.140295	0.760085	0.76612	0.0500033	0.0436642	0.955752
Kmarxianus_Y179_1140	2	604567..606177	KLMA_20283	ATG22	0.281021	0.468256	0.513808	0.124756	0.0408002	0.837719	-0.689408	0.097403	-0.220313	0.566824	0.0223225	1
Kmarxianus_Y179_1141	2	complement(606385..608103)	KLMA_20284	_	0.877736	0.0447821	0.396734	0.227894	0.00614154	0.9875	0.425894	0.268016	0.603804	0.054511	1.42837	0.05124
Kmarxianus_Y179_1142	2	complement(608971..609759)	KLMA_20285	RNA15	-0.19875	0.589153	0.279516	0.203933	0.0034564	0.976467	0.694209	0.0455671	0.613998	0.0331038	1.08688	0.0503588
Kmarxianus_Y179_1143	2	610124..611017	KLMA_20286	DST1	-0.267817	0.495999	-0.05427	0.740889	0.0227502	0.977008	0.554465	0.116289	0.312148	0.222653	0.76794	0.167266
Kmarxianus_Y179_1144	2	611400..611819	KLMA_20287	YGL041W-A	-0.329865	0.174986	0.60577	0.0126328	-0.526815	0.031688	-0.518844	0.112399	-0.619355	0.0440375	-0.720097	0.250603
Kmarxianus_Y179_1145	2	complement(611955..613436)	KLMA_20288	CYS4	-0.0819378	0.956806	-0.011048	0.903261	0.417867	0.0835175	0.470809	0.232609	0.183615	0.512034	-0.0378775	0.899004
Kmarxianus_Y179_1146	2	614626..615294	KLMA_20289	VPS20	-0.194373	0.509629	0.0460858	0.910012	-0.12585	0.555338	-0.0552266	0.968588	0.0629025	0.822579	-0.0769539	0.916076
Kmarxianus_Y179_1147	2	complement(615610..616641)	KLMA_20290	HEM2	-0.312835	0.458243	0.289617	0.243811	0.000965383	0.927282	-0.0225124	0.965	-0.266381	0.485708	-1.69934	0.0153864
Kmarxianus_Y179_1148	2	617179..617922	KLMA_20291	_	-0.138551	0.789511	-0.335741	0.153551	-0.0310179	0.86279	-0.772759	0.0317499	-0.812565	0.0127234	-2.1929	0.00103754
Kmarxianus_Y179_1149	2	618205..618588	KLMA_20292	YER137C	-0.633563	0.0704565	0.22106	0.492546	0.255999	0.489856	-0.256592	0.469353	-0.754545	0.0126471	-1.41181	0.0160441
Kmarxianus_Y179_1150	2	complement(618693..618980)	KLMA_20293	LSM2	-0.870492	0.011191	-0.181793	0.375244	-0.272788	0.211411	0.42645	0.23764	0.290885	0.284878	-0.52769	0.348633
Kmarxianus_Y179_1151	2	complement(619402..620739)	KLMA_20294	GDI1	-0.259881	0.593946	-0.175916	0.493377	-0.173439	0.454635	-0.778561	0.0773114	-0.452205	0.21966	-0.509257	0.46781
Kmarxianus_Y179_1152	2	621579..622847	KLMA_20295	YGL185C	-0.189169	0.631184	-0.39559	0.0508433	0.00993711	0.979978	-0.748611	0.0425481	-0.831092	0.0058722	-0.96912	0.108112
Kmarxianus_Y179_1153	2	624064..625134	KLMA_20296	GPD2	-0.148016	0.552154	0.391254	0.379419	-0.790234	0.00578075	-0.846203	0.018177	-1.0234	0.000514047	-1.38407	0.0313688
Kmarxianus_Y179_1154	2	complement(625508..626866)	KLMA_20297	HOS2	0.0392637	0.894988	-0.0220375	0.849775	-0.101568	0.563969	0.423617	0.198761	0.309449	0.233049	-0.199644	0.741391
Kmarxianus_Y179_1155	2	627680..629287	KLMA_20298	IME4	0.242545	0.516133	0.405694	0.354051	-0.719793	0.0114014	-1.01781	0.0181619	-0.488371	0.214196	-0.74139	0.265082
Kmarxianus_Y179_1156	2	629904..630287	KLMA_20299	COX13	-0.505761	0.174908	0.664886	0.0223404	-0.409293	0.0857205	-0.664637	0.191816	-0.209176	0.656036	-1.74938	0.062913
Kmarxianus_Y179_1157	2	complement(630863..632221)	KLMA_20300	CDC55	-0.216226	0.653847	-0.0256085	0.88216	-0.0529414	0.774434	0.285232	0.400921	0.0572284	0.779127	0.853935	0.136473
Kmarxianus_Y179_1158	2	complement(633638..638428)	KLMA_20301	RIM15	0.611901	0.16192	-0.335593	0.0946854	-0.139892	0.480822	-0.411602	0.225805	-0.395609	0.278909	0.265446	0.629777
Kmarxianus_Y179_1159	2	639069..640070	KLMA_20302	REX2	-0.0479014	0.952101	-0.0721966	0.724506	0.0837592	0.712002	-0.0864052	0.861715	-0.243595	0.465777	-0.30561	0.567924
Kmarxianus_Y179_1160	2	640858..641769	KLMA_20303	HAC1	0.158362	0.667609	0.0479496	0.908615	0.250523	0.36121	-0.319606	0.524507	-0.707888	0.155464	-1.71349	0.0925939
Kmarxianus_Y179_1161	2	642746..643858	KLMA_20304	AGX1	0.0929985	0.791677	0.555875	0.0306739	-0.177405	0.50851	-0.917563	0.0227742	-0.089883	0.850442	-0.646642	0.325814
Kmarxianus_Y179_1162	2	644648..646057	KLMA_20305	SHM2	0.263941	0.581797	-0.0236708	0.869248	0.925989	1.20122e-05	0.037351	0.862587	-0.202588	0.572735	0.554414	0.338762
Kmarxianus_Y179_1163	2	complement(646434..648572)	KLMA_20306	MNL2	0.223641	0.447051	-0.0907139	0.641326	-0.0348678	0.822852	0.498204	0.196046	0.608396	0.0363777	0.709785	0.214052
Kmarxianus_Y179_1164	2	648930..>649076	_	_	-0.42338	0.501964	0.163208	0.759831	-0.38123	0.298794	0.624645	0.286459	0.376789	0.418371	-0.532714	0.986069
Kmarxianus_Y179_1165	2	complement(649075..650028)	KLMA_20307	CAK1	-0.535227	0.141887	-0.22958	0.260941	-0.290304	0.153518	0.491791	0.180189	0.301693	0.323012	1.1548	0.0564787
Kmarxianus_Y179_1166	2	complement(650578..651636)	KLMA_20308	ERG3	-0.680958	0.215538	-1.16598	5.46167e-05	0.655539	0.00334809	0.362183	0.252402	-0.272397	0.410107	-0.400429	0.469787
Kmarxianus_Y179_1167	2	complement(652549..653394)	KLMA_20309	CAF16	-0.610897	0.128011	-0.367105	0.0917521	-0.304943	0.161863	-0.302621	0.402535	-0.241129	0.559666	0.373299	0.489632
Kmarxianus_Y179_1168	2	653736..655652	KLMA_20310	SPT8	0.225842	0.512461	-0.163338	0.419951	0.18067	0.425554	0.350747	0.293864	0.42592	0.128738	1.04039	0.0622717
Kmarxianus_Y179_1169	2	complement(655828..657033)	KLMA_20311	GYP8	0.348015	0.316897	0.193124	0.40275	0.295674	0.222975	1.13653	0.00420204	0.999006	0.00300817	1.74509	0.00210636
Kmarxianus_Y179_1170	2	657474..657782	KLMA_20312	coa6	-0.212992	0.358328	0.243229	0.273867	-0.318714	0.290309	-0.924773	0.0112697	-0.523091	0.0960494	-1.71026	0.00413374
Kmarxianus_Y179_1171	2	complement(658280..659344)	KLMA_20313	YMR244W	0.788803	0.0801899	-0.423599	0.265018	0.0552744	0.883988	0.166082	0.675958	0.493898	0.275243	-0.529967	0.348002
Kmarxianus_Y179_1172	2	661239..662567	KLMA_20314	ZRC1	-0.36499	0.41669	-0.238114	0.250117	-0.133771	0.478969	-0.358387	0.315405	-0.417002	0.20142	-0.349846	0.570689
Kmarxianus_Y179_1173	2	complement(663494..664549)	KLMA_20315	SFG1	-0.0510701	0.969862	-1.07619	0.000258614	-0.432926	0.158156	-0.737555	0.0709556	-0.184768	0.630471	0.97592	0.075967
Kmarxianus_Y179_1174	2	669530..671923	KLMA_20316	isp4	-0.18273	0.673761	-0.508431	0.0116367	-0.553094	0.0105354	-1.38405	0.000122069	-0.90674	0.00338328	-1.45364	0.0301892
Kmarxianus_Y179_1175	2	673232..674287	KLMA_20317	SPS4	-0.00297051	0.944208	0.512549	0.0944485	0.298454	0.353849	-0.687541	0.123777	-2.48935	2.56468e-17	-3.62142	1.02263e-08
Kmarxianus_Y179_1176	2	<676006..676521	KLMA_20318	RPL20B	-0.59613	0.266152	0.243206	0.401921	0.495215	0.0569	0.696038	0.130455	-0.0844816	0.88941	-1.23588	0.109448
Kmarxianus_Y179_1177	2	677096..677941	KLMA_20319	DGK1	-0.367766	0.352244	-0.0385656	0.809283	0.238692	0.28267	0.187121	0.558823	0.293372	0.287576	0.386772	0.483759
Kmarxianus_Y179_1178	2	678558..680099	KLMA_20320	NOP58	-0.0644995	0.972099	-0.252736	0.342402	0.900058	2.11957e-05	0.292188	0.41917	-0.21893	0.561348	-0.700137	0.205025
Kmarxianus_Y179_1179	2	680457..682100	KLMA_20322	SNU66	0.0964666	0.771516	0.0357536	0.9176	-0.113089	0.613902	-0.0185715	0.975773	-0.0376603	0.988584	-0.18579	0.783022
Kmarxianus_Y179_1180	2	682642..683973	KLMA_20323	SLY41	-0.0713985	0.973297	-0.268823	0.188152	-0.0458732	0.795638	0.457284	0.20017	0.507429	0.0733118	0.0469264	0.954804
Kmarxianus_Y179_1181	2	complement(684458..685384)	KLMA_20324	YHM2	-0.457733	0.315131	-0.504966	0.0323843	-0.0330458	0.867454	-0.0119988	0.983828	0.339022	0.197369	-0.00050029	0.98035
Kmarxianus_Y179_1182	2	685426..686019	_	_	-0.0834674	0.93483	-0.66212	0.00399163	-0.0935283	0.697309	-0.514705	0.333773	0.0117253	0.974095	-1.08311	0.0966864
Kmarxianus_Y179_1183	2	686617..688089	KLMA_20326	MCH5	-0.0330527	0.995239	-0.114792	0.566319	0.657946	0.0021003	0.494019	0.164236	0.718607	0.0252074	-0.282081	0.683828
Kmarxianus_Y179_1184	2	complement(688328..689035)	KLMA_20327	RRG7	-0.00794121	0.970105	0.227148	0.427725	0.765901	0.0404433	0.16799	0.658564	0.230217	0.459058	-0.193556	0.723546
Kmarxianus_Y179_1185	2	<689266..689481	KLMA_20328	BIL1	-0.70695	0.0839093	0.453098	0.232603	0.213639	0.698241	1.02011	0.0603867	0.461158	0.310405	0.728779	0.221536
Kmarxianus_Y179_1186	2	689682..691145	KLMA_20329	CUS1	0.0803416	0.764558	0.211448	0.386294	-0.02466	0.928869	0.278133	0.479462	0.0492824	0.867105	-0.364522	0.537299
Kmarxianus_Y179_1187	2	691458..693980	KLMA_20330	NAT1	0.0105265	0.892668	0.0453567	0.919592	0.074786	0.782486	0.0971767	0.772456	0.122015	0.56704	0.804516	0.157813
Kmarxianus_Y179_1188	2	complement(694352..695470)	KLMA_20331	GAL7	-0.309737	0.404597	-0.253663	0.223303	-0.129156	0.537133	-0.281355	0.487897	-0.141855	0.693095	-1.30006	0.0415506
Kmarxianus_Y179_1189	2	complement(696976..699051)	KLMA_20332	GAL10	-0.000388468	0.948349	0.00814192	0.932961	-0.359415	0.0812128	-0.337314	0.548734	0.326691	0.348442	-2.56168	0.0222047
Kmarxianus_Y179_1190	2	700643..702163	KLMA_20333	GAL1	-0.438685	0.265987	-0.112882	0.572283	-0.393166	0.058725	-0.833109	0.0338642	-0.601824	0.0864544	-1.69765	0.0219997
Kmarxianus_Y179_1191	2	complement(702733..704598)	KLMA_20334	_	0.621983	0.291088	0.940321	0.0591552	-0.53462	0.190992	-0.0346145	0.973328	-0.722168	0.126806	-1.07387	0.0723069
Kmarxianus_Y179_1192	2	706193..706621	KLMA_20335	MRPL51	-0.413484	0.191482	0.3262	0.163914	-0.0106202	0.861004	-0.893618	0.0097455	-0.246973	0.491743	-1.38623	0.0169745
Kmarxianus_Y179_1193	2	complement(706830..708671)	KLMA_20336	GCD2	0.214923	0.511038	0.269899	0.276545	0.168568	0.456286	0.670786	0.0558055	0.414078	0.124713	1.09373	0.0593676
Kmarxianus_Y179_1194	2	complement(709016..709972)	KLMA_20337	MRP13	-0.0130908	0.987047	0.21446	0.372685	0.271469	0.239682	-0.378013	0.283742	0.371795	0.156891	0.953412	0.101643
Kmarxianus_Y179_1195	2	710336..710833	KLMA_20338	_	-0.193429	0.55431	0.132115	0.664728	0.142142	0.767856	0.140124	0.756357	0.129866	0.718424	0.912602	0.138045
Kmarxianus_Y179_1196	2	complement(710966..711490)	KLMA_20339	RPL11	-0.837423	0.0833364	0.205238	0.485396	0.581151	0.0197625	0.494966	0.26087	-0.359349	0.36291	-1.17626	0.103511
Kmarxianus_Y179_1197	2	712262..713116	KLMA_20340	PRE2	-0.463142	0.232461	-0.198288	0.408905	-0.259916	0.219843	-0.108926	0.772319	0.0165706	0.848801	0.0620079	0.864495
Kmarxianus_Y179_1198	2	complement(713433..716054)	KLMA_20341	FHL1	0.897935	0.0147746	-0.0868026	0.645114	0.402015	0.0598774	0.612332	0.0594841	0.6668	0.0152433	0.685503	0.272254
Kmarxianus_Y179_1199	2	complement(716287..718629)	KLMA_20342	COG4	0.486046	0.208319	0.0208177	0.971306	0.175594	0.450069	1.26687	0.000214258	1.37193	4.76116e-06	1.9054	0.000817105
Kmarxianus_Y179_1200	2	complement(719585..720511)	KLMA_20343	PIL1	-0.491324	0.315949	-0.334008	0.192785	-0.415936	0.0662184	-1.12827	0.0175159	-0.704954	0.0705798	-0.961735	0.222543
Kmarxianus_Y179_1201	2	720740..721327	_	_	-0.00884067	0.935306	0.250763	0.434906	-0.2814	0.309802	0.684667	0.0869178	0.755226	0.0173744	0.428869	0.417482
Kmarxianus_Y179_1202	2	complement(721331..721963)	KLMA_20344	YTH1	-0.0527499	0.938677	0.229924	0.418796	-0.128588	0.613597	0.125342	0.757766	0.314406	0.29235	-0.00945066	0.961109
Kmarxianus_Y179_1203	2	complement(722226..722744)	KLMA_20345	_	-0.883025	0.0280434	-1.03375	8.73977e-07	-0.330764	0.124932	-1.00644	0.00652471	-1.19929	0.000158492	-1.46348	0.0127251
Kmarxianus_Y179_1204	2	complement(<723241..>724734)	KLMA_20346	RTS1	0.170135	0.620395	-0.0185793	0.901306	-0.0875616	0.690952	-0.0791177	0.883734	-0.0814068	0.885654	-0.722196	0.366893
Kmarxianus_Y179_1205	2	complement(726651..727520)	KLMA_20347	SPO7	-0.13347	0.767892	-0.0430999	0.751866	0.107188	0.631882	0.434467	0.202571	0.633162	0.0401884	0.983787	0.073858
Kmarxianus_Y179_1206	2	728128..729525	KLMA_20348	MDM10	0.23658	0.466217	-0.0244114	0.84598	0.100536	0.753863	0.0217694	0.913739	-6.5176e-06	0.955686	1.14481	0.0505654
Kmarxianus_Y179_1207	2	complement(729625..731973)	KLMA_20349	SWC3	0.397659	0.273915	-0.150021	0.439526	-0.0739608	0.714862	-0.174222	0.652465	0.184971	0.463998	-0.280556	0.663879
Kmarxianus_Y179_1208	2	732233..735571	KLMA_20350	SMC5	0.145223	0.593153	0.023886	0.966942	0.0070741	0.953376	0.263848	0.49567	-0.0501436	0.947157	0.484997	0.398453
Kmarxianus_Y179_1209	2	735858..737465	KLMA_20351	MSE1	0.341489	0.332275	0.597331	0.00690209	0.174659	0.443447	0.565138	0.114376	0.909344	0.000848175	1.01397	0.0913118
Kmarxianus_Y179_1210	2	737743..738495	KLMA_20352	OPI10	-0.419035	0.190604	0.378495	0.260414	-0.116161	0.493417	0.554148	0.14015	0.618655	0.033066	-0.357766	0.571598
Kmarxianus_Y179_1211	2	complement(738531..739781)	KLMA_20353	SIL1	-0.0351276	0.991506	0.124484	0.587735	-0.201114	0.280598	0.390388	0.252295	0.587224	0.038898	0.849602	0.14842
Kmarxianus_Y179_1212	2	complement(740269..741441)	KLMA_20354	CYS3	0.0818168	0.803917	-0.762304	0.00659399	0.548597	0.0123302	1.26043	0.000174298	-0.241321	0.385195	-0.565674	0.320177
Kmarxianus_Y179_1213	2	complement(742411..742734)	KLMA_20355	RPP2A	-0.621605	0.139993	0.659218	0.027256	0.255181	0.291078	0.847477	0.0179943	-0.485017	0.147342	-1.78109	0.00335931
Kmarxianus_Y179_1214	2	743606..744034	KLMA_20356	RPS15	-0.244928	0.669241	0.253397	0.417625	0.390735	0.108419	0.328489	0.385591	-0.460207	0.202185	-1.12763	0.11877
Kmarxianus_Y179_1215	2	complement(<744799..>745503)	KLMA_20357	DEP1	0.1515	0.574473	0.0667237	0.811914	0.0115203	0.992388	1.10666	0.00113769	1.21405	3.07421e-05	1.55418	0.0074476
Kmarxianus_Y179_1216	2	745694..746410	_	DEP1	0.468931	0.183751	-0.0229085	0.832449	0.139424	0.512102	0.311535	0.333963	0.544522	0.0605057	1.00154	0.0670404
Kmarxianus_Y179_1217	2	747511..748857	KLMA_20359	NOP12	0.315572	0.301638	-0.543446	0.00659249	1.16977	0.000304172	0.65985	0.10656	-0.105384	0.780767	-0.957647	0.0660306
Kmarxianus_Y179_1218	2	749227..750006	KLMA_20360	SYN8	-0.21553	0.597554	-0.107184	0.601442	0.0590414	0.897823	-0.429179	0.316078	-0.246162	0.502357	-0.377159	0.548772
Kmarxianus_Y179_1219	2	complement(750271..750885)	KLMA_20361	_	0.0412742	0.795069	-0.0686717	0.702019	-0.263358	0.204745	0.00576452	0.980158	0.0933934	0.712057	-0.646983	0.268826
Kmarxianus_Y179_1220	2	complement(751265..752380)	KLMA_20362	NGL1	0.104644	0.706204	-0.0292201	0.839889	-0.155547	0.48607	-0.702414	0.0558448	0.00480276	0.91313	-0.159751	0.817502
Kmarxianus_Y179_1221	2	752704..753804	KLMA_20363	NTG2	0.193438	0.556844	0.228529	0.315149	-0.174205	0.382694	0.566596	0.0938901	0.602061	0.0262978	0.692978	0.226444
Kmarxianus_Y179_1222	2	complement(753969..755813)	KLMA_20364	TPD3	0.068102	0.804892	0.0763001	0.822891	-0.0661932	0.722622	-0.129194	0.717689	-0.0444263	0.991338	0.375504	0.5318
Kmarxianus_Y179_1223	2	complement(756191..757255)	KLMA_20365	PEX15	0.382996	0.276386	0.597569	0.00775498	-0.139192	0.494111	0.355138	0.308634	0.673278	0.0258338	1.78291	0.00151695
Kmarxianus_Y179_1224	2	757770..759311	KLMA_20366	MUP1	-0.280391	0.443859	-0.148996	0.560693	-0.371918	0.147967	0.289681	0.625902	0.44426	0.250656	0.933238	0.135293
Kmarxianus_Y179_1225	2	complement(759603..763223)	KLMA_20367	PSK1	0.633407	0.113801	-0.267704	0.193634	0.246843	0.251558	-0.381306	0.281899	-0.30857	0.382992	-0.801426	0.239305
Kmarxianus_Y179_1226	2	765502..766431	KLMA_20368	LDS1	0.0443396	1	0.198102	0.884522	-0.350868	0.662578	-1.32864	0.00709433	-0.69498	0.0392225	-2.10053	0.000492951
Kmarxianus_Y179_1227	2	767923..771105	KLMA_20369	GAL11	0.593862	0.230318	-0.301976	0.196624	-0.0985649	0.593407	-0.34079	0.414311	-0.184115	0.61804	-0.518222	0.477416
Kmarxianus_Y179_1228	2	771488..772951	KLMA_20370	GSH2	-0.379044	0.345797	-0.0876969	0.656322	-0.311247	0.123319	-0.241516	0.484143	0.288715	0.253194	1.18361	0.033376
Kmarxianus_Y179_1229	2	complement(772998..773486)	KLMA_20371	RRT8	1.00043	0.155471	0.178796	0.979487	-0.0270785	0.932766	1.08492	0.0748151	1.29386	0.00584926	2.2746	0.000355291
Kmarxianus_Y179_1230	2	complement(773897..777022)	KLMA_20372	FUN30	0.312399	0.297089	-0.479169	0.0225303	0.465564	0.0449101	0.713464	0.0558023	0.803815	0.00552725	1.51165	0.00918593
Kmarxianus_Y179_1231	2	complement(<777677..780699)	KLMA_20373	RAT1	0.319842	0.341516	-0.246081	0.249264	0.182274	0.433205	0.21685	0.512533	0.265989	0.302292	0.0805742	0.963983
Kmarxianus_Y179_1232	2	complement(781145..784072)	KLMA_20374	CCC2	0.467524	0.190599	0.299659	0.206152	0.0629365	0.812197	0.282285	0.42794	0.569833	0.0409913	-0.542619	0.356621
Kmarxianus_Y179_1233	2	785104..785307	KLMA_20375	YDL085C-A	0.223891	0.55843	-0.0333096	0.969231	0.308373	0.104992	0.57989	0.0906425	0.831541	0.00367529	-1.31494	0.0411751
Kmarxianus_Y179_1234	2	complement(785521..786564)	KLMA_20376	TIF34	-0.415813	0.341416	-0.00447597	0.910716	0.516851	0.0201022	0.495148	0.181039	0.663304	0.0290892	1.26982	0.0515372
Kmarxianus_Y179_1235	2	complement(787032..787844)	KLMA_20377	YDL086W	-0.76744	0.0697836	-1.07787	1.54103e-05	0.190218	0.378432	-0.00616862	0.975096	0.141917	0.519127	1.20119	0.0300676
Kmarxianus_Y179_1236	2	788141..788938	KLMA_20379	YPL034W	-0.127107	0.834462	-0.548019	0.0191494	0.142109	0.538837	0.616673	0.161715	0.237769	0.481865	0.293247	0.661591
Kmarxianus_Y179_1237	2	790107..790379	KLMA_20380	_	0.175882	0.879166	0.148956	0.851139	-0.582038	0.150757	-0.799154	0.0201461	-2.02466	1.32335e-08	-4.20819	2.44703e-06
Kmarxianus_Y179_1238	2	<791196..>791417	KLMA_20381	OSW5	-0.507864	0.554718	-1.30962	0.0684457	1.5334	0.183494	1.50878	0.186432	-2.03803	0.00468298	-3.1904	8.00221e-05
Kmarxianus_Y179_1239	2	791933..792730	KLMA_20382	SWP1	-0.598766	0.100149	-0.149081	0.470498	0.106694	0.674902	1.01461	0.00301057	0.802569	0.00607973	1.4385	0.0137634
Kmarxianus_Y179_1240	2	complement(792788..793297)	KLMA_20383	IMP1	-0.454068	0.218849	-0.204367	0.418839	0.184046	0.618148	-0.168215	0.695044	-0.292872	0.410847	-0.937512	0.169547
Kmarxianus_Y179_1241	2	complement(793410..794033)	KLMA_20384	_	0.0742577	0.905501	0.378346	0.849982	-0.788477	0.185105	0.533758	0.565479	0.639856	0.49788	-0.130193	0.797998
Kmarxianus_Y179_1242	2	794348..795148	KLMA_20385	LUC7	-0.0110418	0.979799	0.0450338	0.915926	0.0829687	0.794405	-0.596904	0.120224	-0.51991	0.117521	-1.27326	0.0304047
Kmarxianus_Y179_1243	2	795441..796709	KLMA_20386	ASM4	-0.00563867	0.961875	0.0210749	0.974717	-0.0105928	0.929496	0.294759	0.390258	0.195576	0.439428	0.100118	0.864238
Kmarxianus_Y179_1244	2	complement(796831..798462)	KLMA_20387	NUR1	-0.147889	0.809067	-0.180234	0.355566	0.184645	0.502343	0.759267	0.0539253	0.60742	0.056742	1.1929	0.0417587
Kmarxianus_Y179_1245	2	complement(798671..800764)	KLMA_20388	RIM13	0.22738	0.452907	-0.0354606	0.864396	-0.292293	0.166937	-0.664228	0.067278	-0.580883	0.0714245	-0.724407	0.219991
Kmarxianus_Y179_1246	2	800952..802241	KLMA_20389	RAM1	-0.138428	0.71948	0.121969	0.706007	-0.261371	0.295893	0.0226368	0.92832	-0.121181	0.731664	0.681678	0.2219
Kmarxianus_Y179_1247	2	802570..803829	KLMA_20390	UBX3	-0.180291	0.636648	-0.109511	0.545161	-0.219486	0.285628	-0.337189	0.369198	-0.0660235	0.891681	0.0192811	0.933714
Kmarxianus_Y179_1248	2	complement(803900..804325)	KLMA_20391	SRP14	-0.413069	0.293567	-0.0418543	0.772123	0.0331774	0.912609	-0.0596315	0.934708	-0.172589	0.644943	-0.903671	0.137587
Kmarxianus_Y179_1249	2	805584..806819	KLMA_20392	_	0.636947	0.118887	0.0130645	0.944643	0.476558	0.0376869	0.337583	0.279285	-0.257638	0.439903	-0.560807	0.374054
Kmarxianus_Y179_1250	2	complement(807690..809162)	KLMA_20393	STP3	1.43555	0.000696349	-0.0323618	0.833364	-0.278158	0.212983	-0.166006	0.706068	-0.812271	0.0422827	-1.30074	0.146657
Kmarxianus_Y179_1251	2	complement(812119..813099)	KLMA_20394	ARC35	-0.353161	0.418873	0.0391537	0.93919	-0.236993	0.280855	-0.235695	0.588072	-0.208607	0.583743	0.185681	0.69944
Kmarxianus_Y179_1252	2	complement(813426..813929)	KLMA_20395	MRPS12	-0.352424	0.249932	0.168697	0.473428	0.151799	0.501622	-0.777714	0.0300338	-0.459563	0.144058	-1.76558	0.00301993
Kmarxianus_Y179_1253	2	814550..816043	KLMA_20396	PTC6	-0.0076192	0.991479	-0.267487	0.378609	-0.259167	0.319996	0.190189	0.669533	0.34915	0.32288	1.07668	0.06548
Kmarxianus_Y179_1254	2	complement(816316..816591)	KLMA_20397	RSM19	-0.2763	0.277362	0.427122	0.0482659	0.0510261	0.874847	-0.354186	0.29941	-0.395397	0.220773	-0.79984	0.161822
Kmarxianus_Y179_1255	2	816879..818810	KLMA_20398	DBP6	0.296486	0.30425	-0.532553	0.015503	0.652768	0.0441062	0.241193	0.522125	0.18765	0.445839	0.836546	0.145758
Kmarxianus_Y179_1256	2	819092..823060	KLMA_20399	SRB8	0.238858	0.479378	0.0327955	0.938315	-0.257022	0.169615	-0.603882	0.0663404	-0.377376	0.286999	-0.183863	0.774345
Kmarxianus_Y179_1257	2	complement(823148..825046)	KLMA_20400	ZRG17	0.482405	0.188842	0.184263	0.439022	-0.167946	0.372683	0.581957	0.0829475	0.477765	0.0780791	0.614294	0.298412
Kmarxianus_Y179_1258	2	826052..826450	KLMA_20401	AHC2	-0.4535	0.189451	-0.219229	0.276075	0.237255	0.311551	0.50026	0.129551	0.616461	0.0198104	0.113685	0.798452
Kmarxianus_Y179_1259	2	complement(826995..828587)	KLMA_20402	YBR241C	0.0694767	0.814455	-0.372209	0.117164	-0.080935	0.737174	-0.170512	0.682083	0.225998	0.371854	0.606843	0.256973
Kmarxianus_Y179_1260	2	<829971..830372	KLMA_20403	RPL28	-0.760293	0.0930156	0.253681	0.405554	0.335433	0.169954	0.288983	0.452027	-0.961594	0.00739295	-2.6764	0.000406532
Kmarxianus_Y179_1261	2	830860..831636	KLMA_20404	YBR242W	-0.658728	0.0666811	0.207056	0.38403	0.796957	0.0105385	0.947468	0.0244638	0.163483	0.579517	0.288888	0.688339
Kmarxianus_Y179_1262	2	complement(831773..833116)	KLMA_20405	ALG7	-0.365499	0.35246	0.058366	0.888353	0.39108	0.0987457	1.18081	0.00369326	1.17405	0.00108707	2.02567	0.00124971
Kmarxianus_Y179_1263	2	833450..834457	KLMA_20406	SEH1	-0.330519	0.462894	0.000993247	0.915814	0.120575	0.603014	0.0701908	0.805827	0.270002	0.275948	0.648485	0.238234
Kmarxianus_Y179_1264	2	835529..836113	KLMA_20407	HYR1	-0.755101	0.0349546	0.402547	0.106565	0.432457	0.0715308	-0.158023	0.732515	-0.560028	0.156837	-1.9315	0.0255825
Kmarxianus_Y179_1265	2	complement(836399..839680)	KLMA_20408	ISW1	0.436828	0.292119	-0.211291	0.392886	0.263464	0.247436	0.23495	0.498696	0.358575	0.185995	1.04613	0.0731748
Kmarxianus_Y179_1266	2	840011..841141	_	RRT2	-0.15352	0.751337	-0.00447064	0.965525	0.687798	0.0244903	0.261923	0.4368	-0.0421373	0.956999	0.585592	0.300489
Kmarxianus_Y179_1267	2	841365..843314	KLMA_20409	LSG1	0.267384	0.366756	-0.588627	0.00398808	0.540024	0.0237576	0.206078	0.523153	-0.19051	0.557854	-0.463532	0.348077
Kmarxianus_Y179_1268	2	844174..844947	KLMA_20410	USE1	-0.535713	0.0967045	0.14441	0.56247	-0.0771828	0.692711	-0.0680102	0.858553	-0.308345	0.413464	-0.530687	0.371227
Kmarxianus_Y179_1269	2	complement(845201..846622)	KLMA_20411	ENP1	0.107293	0.613073	-0.562243	0.00487021	1.16176	0.000559618	0.233719	0.514388	-0.355597	0.301978	-0.928731	0.0753048
Kmarxianus_Y179_1270	2	847225..848664	KLMA_20412	SRM1	-0.192276	0.714906	-0.52617	0.0135268	0.468403	0.034354	0.87322	0.0104293	1.39175	2.41372e-06	1.93996	0.000804923
Kmarxianus_Y179_1271	2	complement(848796..850454)	KLMA_20413	HIS7	0.109401	0.780233	0.494664	0.0572008	0.0573532	0.861415	0.112342	0.744631	0.680222	0.015574	1.32248	0.0282448
Kmarxianus_Y179_1272	2	complement(850842..851936)	KLMA_20414	ARO4	0.148656	0.667178	0.65044	0.0260602	0.0969037	0.73673	-1.16369	0.0117115	-0.484307	0.186711	-0.940549	0.135828
Kmarxianus_Y179_1273	2	complement(852476..853720)	KLMA_20415	BBP1	-0.0241432	0.955931	0.233597	0.304333	0.395257	0.144683	0.386426	0.309268	0.983923	0.00150589	0.703655	0.221402
Kmarxianus_Y179_1274	2	853867..854745	KLMA_20416	_	-0.169165	0.744624	0.833488	0.0232481	0.753639	0.0360493	-0.319731	0.519569	0.777776	0.0629602	-0.220911	0.785794
Kmarxianus_Y179_1275	2	856052..857647	KLMA_20417	CLN2	-0.154731	0.770075	-0.277658	0.265394	0.502872	0.0139474	-0.0485085	0.865984	0.533779	0.0602277	1.59731	0.00613593
Kmarxianus_Y179_1276	2	858332..859057	KLMA_20418	ROT1	-0.138957	0.681563	0.139727	0.573249	-0.23531	0.252525	-0.168967	0.697484	-0.413415	0.221007	-1.05103	0.112515
Kmarxianus_Y179_1277	2	859487..861301	KLMA_20419	VPS27	0.358571	0.332914	0.145877	0.537774	-0.19898	0.345185	-0.305988	0.449873	-0.404265	0.223935	-0.367127	0.583425
Kmarxianus_Y179_1278	2	complement(861479..>862519)	KLMA_20422	RAD14	0.124433	0.706189	0.431927	0.0523293	-0.0188076	0.870945	0.479466	0.146628	0.6709	0.0187489	0.989597	0.0859478
Kmarxianus_Y179_1279	2	862919..864367	KLMA_20423	MCH1	0.0484018	0.87705	0.585118	0.00813235	-0.242069	0.208386	0.183304	0.59411	0.306527	0.243117	1.01949	0.0731344
Kmarxianus_Y179_1280	2	864760..866202	KLMA_20424	SEC61	-0.338325	0.426766	-0.17409	0.453578	0.505622	0.0274787	0.448684	0.195975	0.541423	0.0383609	1.34424	0.0156953
Kmarxianus_Y179_1281	2	complement(866907..867665)	KLMA_20425	RSM26	-0.168501	0.623513	0.11805	0.656008	0.220625	0.342781	-0.5063	0.162391	-0.152457	0.707264	-0.715484	0.230001
Kmarxianus_Y179_1282	2	868089..869357	KLMA_20426	RAD55	0.231683	0.486091	0.157551	0.563772	0.17575	0.433414	0.941956	0.00692202	0.488458	0.0811786	-0.123571	0.842463
Kmarxianus_Y179_1283	2	870422..871111	KLMA_20427	SED1	0.33923	0.376185	0.408937	0.103746	0.328184	0.195221	-0.0082333	0.979342	-0.613644	0.210605	-1.70688	0.111323
Kmarxianus_Y179_1284	2	complement(871953..874571)	KLMA_20428	MUC1	0.46646	0.20879	-0.182909	0.325632	-0.147327	0.43747	-0.366558	0.302618	-0.251143	0.465559	-1.23888	0.0554371
Kmarxianus_Y179_1285	2	complement(877094..879457)	KLMA_20429	UBP3	0.4007	0.282896	-0.251412	0.26916	0.0475486	0.853342	-0.277967	0.491244	0.138058	0.568166	-0.0800732	0.957061
Kmarxianus_Y179_1286	2	complement(879964..880617)	KLMA_20430	SHU2	-0.546905	0.079418	0.111846	0.703983	-0.204905	0.371148	0.571873	0.165352	0.32077	0.335197	1.06215	0.0706825
Kmarxianus_Y179_1287	2	complement(881204..882559)	KLMA_20431	YER152C	-0.317956	0.423513	-0.0577027	0.722291	-0.405043	0.0602164	-0.339546	0.372699	-0.288643	0.434216	0.775441	0.164492
Kmarxianus_Y179_1288	2	complement(882948..883772)	KLMA_20432	PET122	-0.377275	0.34395	0.164429	0.533971	0.0775415	0.788904	-0.472884	0.202639	-0.0384389	0.992899	-0.725589	0.182585
Kmarxianus_Y179_1289	2	<884327..>885397	KLMA_20433	OXA1	-0.150522	0.736495	0.0769402	0.77497	0.288494	0.222997	-0.54728	0.119219	0.372122	0.135732	0.516301	0.368872
Kmarxianus_Y179_1290	2	complement(885547..891675)	KLMA_20434	BEM2	0.459022	0.246664	-0.106504	0.605217	0.118787	0.642873	-0.0164976	0.974204	0.234919	0.3829	0.559214	0.384806
Kmarxianus_Y179_1291	2	893709..895883	KLMA_20435	YLL032C	-0.204339	0.721518	-1.17076	7.48459e-08	0.138343	0.734811	-0.245386	0.474561	0.604757	0.0397714	1.06016	0.0638954
Kmarxianus_Y179_1292	2	complement(895972..896538)	KLMA_20436	IRC19	0.198183	0.609227	0.416109	0.232486	0.284709	0.54407	0.471914	0.401993	0.811922	0.0865153	1.71594	0.0161296
Kmarxianus_Y179_1293	2	896902..899346	KLMA_20437	RIX7	0.543271	0.110495	-0.413925	0.0439945	0.42343	0.0958689	1.0466	0.00444588	0.582532	0.0696075	0.908601	0.112375
Kmarxianus_Y179_1294	2	complement(<899388..>901115)	KLMA_20439	GRC3	0.483212	0.158075	-0.471028	0.104775	0.461717	0.154751	0.230377	0.548329	0.242809	0.47695	0.775936	0.160141
Kmarxianus_Y179_1295	2	complement(901696..903171)	KLMA_20440	RIM101	-0.0068434	0.944727	-0.237623	0.291785	-0.0175848	0.880573	-0.27391	0.537996	-0.805758	0.0338372	-1.13859	0.203026
Kmarxianus_Y179_1296	2	complement(904615..906132)	KLMA_20441	WSC4	0.342363	0.465761	-0.180479	0.352278	0.3787	0.0897748	0.349812	0.373199	0.267015	0.406855	0.313173	0.658842
Kmarxianus_Y179_1297	2	908828..909520	KLMA_20442	UBI4	-0.232906	0.461732	0.640244	0.0120028	-0.270939	0.257719	0.143666	0.802237	0.158925	0.675848	-0.751714	0.455342
Kmarxianus_Y179_1298	2	complement(909798..915350)	KLMA_20443	ECM29	0.376676	0.340173	0.026254	0.948437	0.137343	0.630285	0.41604	0.267506	0.199986	0.45301	0.421337	0.526401
Kmarxianus_Y179_1299	2	915667..917505	KLMA_20444	TFC6	-0.0370464	0.994255	0.00609716	0.96534	-0.269111	0.223718	-0.613079	0.0831189	-0.0254632	0.946302	-0.420251	0.430524
Kmarxianus_Y179_1300	2	complement(917571..918905)	KLMA_20445	UBA4	0.0684951	0.763654	-0.0312435	0.796894	-0.226635	0.264489	-0.0852084	0.820876	-0.0515632	0.978071	-0.521247	0.397093
Kmarxianus_Y179_1301	2	complement(919247..919888)	KLMA_20446	ERP5	-0.739011	0.0484661	-0.636202	0.0487865	-0.676862	0.0187476	-0.707367	0.08243	-0.684199	0.0564097	-0.984799	0.0982763
Kmarxianus_Y179_1302	2	complement(920182..921717)	KLMA_20447	CTM1	0.128356	0.666853	-0.100004	0.630228	-0.128322	0.56947	-0.332933	0.366401	0.0548313	0.764651	-0.512764	0.347676
Kmarxianus_Y179_1303	2	922051..922863	KLMA_20448	BCP1	-0.315153	0.35932	-0.159482	0.412359	0.212158	0.45092	0.380506	0.266776	-0.125244	0.778202	-1.1604	0.0435215
Kmarxianus_Y179_1304	2	923426..926407	KLMA_20449	EAF1	0.992227	0.0225126	-0.0973698	0.647958	0.0933946	0.731863	0.216323	0.536254	0.0478696	0.79764	0.00279008	0.985883
Kmarxianus_Y179_1305	2	complement(926595..928343)	KLMA_20450	GGA2	0.314406	0.421726	0.107801	0.729813	-0.164993	0.453937	-0.184708	0.651013	-0.052675	0.950117	0.594039	0.301711
Kmarxianus_Y179_1306	2	928699..929031	KLMA_20451	CLN1	-0.804745	0.0127735	0.490665	0.113617	0.0467426	0.967733	-0.0285566	0.990695	0.210734	0.678296	0.521423	0.519583
Kmarxianus_Y179_1307	2	complement(929074..931716)	KLMA_20452	SPC110	0.353831	0.289942	0.163368	0.505871	0.276585	0.362314	-0.241385	0.583393	0.334826	0.277499	1.51101	0.0114992
Kmarxianus_Y179_1308	2	complement(931980..933179)	KLMA_20453	EFM2	-0.00561697	0.951995	0.0628279	0.846042	0.181636	0.47848	0.784667	0.0391822	0.576566	0.0489174	0.7484	0.182828
Kmarxianus_Y179_1309	2	complement(933420..934619)	KLMA_20454	TRP4	-0.354144	0.306094	0.493518	0.027337	-0.115275	0.50368	0.282352	0.393053	0.625342	0.033921	1.39112	0.0172599
Kmarxianus_Y179_1310	2	935060..936145	KLMA_20455	_	-0.00813152	0.946037	0.0108754	0.970789	0.142003	0.541793	-0.495979	0.159858	-0.367182	0.252565	-0.0633942	0.95717
Kmarxianus_Y179_1311	2	complement(936764..938425)	KLMA_20456	_	0.43877	0.231613	-0.377383	0.090937	0.377922	0.171585	-0.301929	0.495605	-0.0753875	0.913102	-1.29136	0.0288633
Kmarxianus_Y179_1312	2	943985..944809	KLMA_20457	POM33	0.330668	0.447753	0.0814637	0.806828	-0.0760551	0.627108	0.429836	0.200896	-0.0679499	0.920042	-0.178215	0.802283
Kmarxianus_Y179_1313	2	945687..947609	KLMA_20459	SSA2	0.150416	0.691703	-0.0838456	0.703791	0.414176	0.140095	0.888366	0.0780307	1.4622	0.000584125	1.63348	0.118141
Kmarxianus_Y179_1314	2	948614..949549	KLMA_20460	YPR011C	-0.0841223	0.74908	0.330599	0.290856	-0.751083	0.0416311	-0.783124	0.0523614	-0.342516	0.367656	-0.455895	0.440614
Kmarxianus_Y179_1315	2	950340..950558	KLMA_20461	YPR010C-A	-0.815555	0.0183949	0.851019	0.000551158	-0.679747	0.00100695	-0.78811	0.0755542	-0.408426	0.281632	-1.51193	0.02243
Kmarxianus_Y179_1316	2	complement(950951..952807)	KLMA_20462	uapC	0.971884	0.0100086	0.536757	0.0152136	0.0850288	0.772638	-0.323036	0.440433	-0.108105	0.8384	0.544443	0.313143
Kmarxianus_Y179_1317	2	complement(953773..954642)	KLMA_20463	HAH1	-0.0476859	0.997321	0.258351	0.329437	-0.151151	0.514914	-1.15366	0.00126881	-0.60925	0.047112	-1.48327	0.0146273
Kmarxianus_Y179_1318	2	955161..955517	KLMA_20464	VMA7	-0.82163	0.0273393	-0.385859	0.0940176	-0.086027	0.664945	0.811785	0.0195686	0.336113	0.231324	0.663491	0.239919
Kmarxianus_Y179_1319	2	complement(955696..957456)	KLMA_20465	CHS5	0.0611556	0.814479	-0.149945	0.512691	0.0844439	0.740829	0.535643	0.154616	0.675763	0.0299133	1.31318	0.0572686
Kmarxianus_Y179_1320	2	959146..961089	KLMA_20466	SDH1	0.712248	0.107038	0.370861	0.181743	-0.0208598	0.885053	-1.09152	0.0351237	-0.273547	0.549981	-1.16773	0.207085
Kmarxianus_Y179_1321	2	961895..963049	KLMA_20467	DBR1	0.0619398	0.858678	0.216136	0.40151	-0.0321493	0.854485	0.774491	0.0546187	0.144494	0.580724	0.654178	0.271218
Kmarxianus_Y179_1322	2	complement(963227..964114)	KLMA_20468	MCR1	-0.183233	0.679943	0.706352	0.0101393	-0.78893	0.00118657	-0.740702	0.131662	-0.484502	0.235627	-0.140056	0.891132
Kmarxianus_Y179_1323	2	964853..965851	KLMA_20469	YKL151C	-0.90633	0.0182467	-0.604981	0.00497292	-0.280926	0.172943	-0.589998	0.130846	-0.483853	0.170583	-1.06902	0.0949304
Kmarxianus_Y179_1324	2	complement(966004..966942)	KLMA_20470	RPC34	-0.24051	0.499207	-0.28879	0.195586	0.539123	0.09142	0.596326	0.109259	0.399338	0.16321	0.898988	0.131796
Kmarxianus_Y179_1325	2	complement(967317..970385)	KLMA_20471	ADP1	0.243254	0.520999	-0.0925187	0.641537	-0.238225	0.226995	-0.781271	0.0302766	-0.0839736	0.871425	0.538076	0.318019
Kmarxianus_Y179_1326	2	complement(970853..971863)	KLMA_20472	YFR018C	-0.341488	0.364817	-0.252002	0.223513	0.0908277	0.769218	0.178358	0.693444	-0.0827917	0.920963	0.61727	0.306412
Kmarxianus_Y179_1327	2	972143..978313	KLMA_20473	FAB1	0.184965	0.583874	-0.102145	0.600133	-0.0174232	0.848462	-0.203404	0.567812	-0.284812	0.422861	-0.513644	0.412186
Kmarxianus_Y179_1328	2	979354..980895	KLMA_20474	ATG18	0.22387	0.494087	0.134719	0.581377	-0.09414	0.640028	0.291088	0.387972	0.556246	0.0455389	0.975183	0.0918567
Kmarxianus_Y179_1329	2	982236..984566	KLMA_20475	ROD1	0.224803	0.505992	-0.184546	0.386633	-0.335568	0.097979	-0.206616	0.609931	0.168006	0.5492	-0.0187523	1
Kmarxianus_Y179_1330	2	complement(985222..>985359)	_	VMA9	-0.830391	0.015838	-0.241809	0.269776	0.0172704	0.979192	0.214052	0.592373	-0.269442	0.452982	-0.526979	0.470779
Kmarxianus_Y179_1331	2	join(986110..986357,986500..986536)	KLMA_20476	STP22	0.749985	0.185142	-0.0725311	0.80469	0.0937618	0.850435	-0.939522	0.124796	-0.102585	0.944834	-0.0765309	0.901744
Kmarxianus_Y179_1332	2	987755..990487	KLMA_20477	_	0.581967	0.121221	0.124673	0.608142	-0.150777	0.450329	0.371961	0.329082	0.678413	0.0305102	1.26547	0.0264491
Kmarxianus_Y179_1333	2	990921..992357	KLMA_20478	CBF5	-0.351917	0.436847	-0.0752679	0.69483	0.554805	0.0142302	0.399121	0.253328	-0.103955	0.815989	-0.989045	0.0902359
Kmarxianus_Y179_1334	2	complement(993232..994299)	KLMA_20479	DNAJB13	-0.105778	0.827688	-0.11109	0.54107	0.36673	0.125683	0.460365	0.341291	1.05075	0.00811304	0.291135	0.74213
Kmarxianus_Y179_1335	2	994834..995745	KLMA_20480	LST8	-0.304199	0.407622	-0.137111	0.50167	-0.0443876	0.771786	0.329106	0.295437	0.571866	0.0396459	0.227401	0.63674
Kmarxianus_Y179_1336	2	complement(996334..998832)	KLMA_20481	RFX1	1.09044	0.0096497	-0.0587905	0.710302	0.412949	0.125706	0.852433	0.0328243	0.748908	0.0194825	-0.0891646	0.797306
Kmarxianus_Y179_1337	2	1000566..1001531	KLMA_20482	RLP7	0.673927	0.0538172	-0.138798	0.438545	0.434019	0.130748	0.707404	0.0408265	-0.228497	0.481428	-0.643295	0.203688
Kmarxianus_Y179_1338	2	1002117..1003205	KLMA_20483	LEU2	0.0389346	0.896082	-0.132513	0.574976	-0.31996	0.161898	-0.367836	0.321514	-0.184067	0.613624	0.806936	0.133594
Kmarxianus_Y179_1339	2	complement(1003729..1005207)	KLMA_20484	NFS1	0.00499653	0.90949	0.137162	0.679619	-0.277552	0.149778	-0.611127	0.114268	-0.368923	0.283928	-0.690011	0.291626
Kmarxianus_Y179_1340	2	1005743..1006567	KLMA_20485	PET8	-0.469961	0.245579	-0.168964	0.383166	0.0282331	0.942306	0.603453	0.1201	0.707289	0.0303333	1.41953	0.0157281
Kmarxianus_Y179_1341	2	complement(1006780..1007892)	KLMA_20486	DCC1	-0.763659	0.0415087	-0.504426	0.0242056	0.55781	0.140672	-0.0530941	0.968279	0.402102	0.302368	1.26732	0.060194
Kmarxianus_Y179_1342	2	1008432..1012799	KLMA_20487	BUD3	0.437051	0.227668	-0.238537	0.224786	0.21274	0.431384	-0.404168	0.263945	-0.0528649	0.981968	0.347331	0.484777
Kmarxianus_Y179_1343	2	complement(1012925..>1014232)	KLMA_20488	HRB1	-0.206561	0.657628	0.164785	0.527603	0.0383263	0.889705	0.0545647	0.857312	-0.110338	0.784128	0.0298298	0.935511
Kmarxianus_Y179_1344	2	1015023..1016951	KLMA_20489	LYS14	-0.0811469	0.87516	0.199475	0.403458	-0.135705	0.46791	-0.409134	0.208872	0.129011	0.55497	0.866199	0.116473
Kmarxianus_Y179_1345	2	1017690..1019369	KLMA_20490	TPN1	0.236176	0.489385	0.350077	0.155888	0.123514	0.632388	0.548116	0.0977712	0.487609	0.0736432	0.200297	0.723467
Kmarxianus_Y179_1346	2	1020078..1020542	KLMA_20491	COX4	-0.574262	0.174457	0.759297	0.00842964	-0.50421	0.0274268	-0.711604	0.160258	-0.205505	0.675546	-1.62164	0.0772532
Kmarxianus_Y179_1347	2	1022073..1022432	KLMA_20492	RPS26A	-0.395508	0.454709	0.151671	0.592507	0.332755	0.201985	0.626866	0.171077	-0.164177	0.692355	-0.857969	0.259104
Kmarxianus_Y179_1348	2	1022960..1024747	KLMA_20493	FRS1	-0.132066	0.820545	0.269484	0.34854	0.147561	0.580475	0.746559	0.0360763	0.273182	0.294405	1.16894	0.045854
Kmarxianus_Y179_1349	2	complement(1024865..1027582)	KLMA_20494	MIL1	0.444374	0.215997	-0.0329705	0.815113	0.103501	0.686116	0.0291144	0.949953	0.238558	0.360105	0.288895	0.599593
Kmarxianus_Y179_1350	2	join(1028090..1028101,1028457..1028807)	KLMA_20495	RPL22A	-0.59434	0.141028	0.212722	0.470907	1.72663	3.31309e-15	2.14671	5.53665e-10	0.889769	0.0014286	-0.0160762	0.95751
Kmarxianus_Y179_1351	2	complement(<1029424..>1029681)	KLMA_20496	SMX3	-0.62373	0.0742179	0.127191	0.588302	-0.380037	0.190472	0.0776848	0.88341	-0.450992	0.283061	-0.0123971	0.963779
Kmarxianus_Y179_1352	2	complement(1030147..1031325)	KLMA_20497	GAB1	-0.463924	0.265409	0.157529	0.537661	0.255454	0.274897	0.884174	0.0142124	0.413746	0.13726	1.06905	0.0706381
Kmarxianus_Y179_1353	2	1031766..1034048	KLMA_20498	SEC23	-0.0910304	0.914563	0.156296	0.627287	0.243192	0.3305	0.333393	0.383982	0.58889	0.0409118	1.29464	0.0307917
Kmarxianus_Y179_1354	2	complement(1034229..1035242)	KLMA_20499	AOS1	-0.426029	0.253454	-0.124953	0.513886	-0.140388	0.508439	0.284744	0.477971	-0.074637	0.86784	0.0594474	0.943193
Kmarxianus_Y179_1355	2	1035722..1037632	KLMA_20500	HDA3	0.139102	0.629974	-0.0871806	0.66843	0.0189399	0.976777	0.402436	0.246417	0.445178	0.112593	0.993516	0.0739049
Kmarxianus_Y179_1356	2	complement(1037709..1039127)	KLMA_20501	PRP4	-0.137127	0.752465	0.115327	0.650959	-0.399548	0.096393	-0.155034	0.707801	-0.332098	0.368953	-0.251361	0.69512
Kmarxianus_Y179_1357	2	1039288..1040262	KLMA_20502	BET2	-0.574866	0.118544	-0.106044	0.573419	-0.215615	0.35853	-0.497992	0.186154	-0.503133	0.171715	-0.2644	0.702868
Kmarxianus_Y179_1358	2	complement(1040323..1042440)	KLMA_20503	DPB2	0.108987	0.653257	-0.361496	0.0821823	-0.107849	0.587106	1.14776	0.00404275	0.601025	0.0594097	1.51819	0.00929958
Kmarxianus_Y179_1359	2	1042878..1043900	KLMA_20504	NBP1	0.108658	0.651916	-0.196103	0.335059	0.220719	0.410952	0.739357	0.0560302	0.678989	0.0411631	0.928599	0.0934652
Kmarxianus_Y179_1360	2	1047040..1050150	KLMA_20505	YGR125W	0.547572	0.172304	0.327327	0.210859	0.241344	0.292858	0.532327	0.122461	0.515984	0.0542998	1.37395	0.0214188
Kmarxianus_Y179_1361	2	1050490..1050951	KLMA_20506	YGR126W	-0.725002	0.0369654	-0.853983	0.000889778	-0.175828	0.452429	-0.385919	0.277498	-0.508843	0.0849482	-1.54635	0.00734637
Kmarxianus_Y179_1362	2	1051119..1052042	KLMA_20507	YGR127W	-0.484748	0.154413	-0.5082	0.0303938	-0.156821	0.423743	-0.091018	0.804929	-0.444673	0.163692	-0.464767	0.450059
Kmarxianus_Y179_1363	2	complement(1052113..1054050)	KLMA_20508	UTP8	0.187328	0.454448	-0.714087	0.000448818	0.719883	0.00906769	0.663812	0.0690255	0.276771	0.311663	0.653539	0.305817
Kmarxianus_Y179_1364	2	1054346..1054987	KLMA_20509	SYF2	0.0185858	1	-0.102079	0.681371	0.309544	0.40697	0.0506002	0.954397	-0.225626	0.62521	-0.110976	0.923349
Kmarxianus_Y179_1365	2	complement(1055040..1056302)	KLMA_20510	YPR148C	-0.0105904	0.9431	-0.181547	0.411131	-0.26423	0.200028	-0.629214	0.0880948	-0.532996	0.0911077	0.0667373	0.838427
Kmarxianus_Y179_1366	2	1056674..1057144	KLMA_20511	RSM18	-0.395651	0.196513	0.200282	0.337801	0.12134	0.680828	-0.602007	0.0776776	-0.365994	0.255978	-1.75451	0.00241204
Kmarxianus_Y179_1367	2	complement(1057269..1058483)	KLMA_20512	PKP1	-0.177039	0.685345	0.223678	0.32596	-0.0791822	0.642175	-0.469957	0.178955	-0.648232	0.0299538	-0.261245	0.654422
Kmarxianus_Y179_1368	2	1059678..1060583	KLMA_20513	GVP36	-0.0892525	0.855244	0.0873768	0.781803	0.0132791	0.952866	-0.197588	0.699303	-0.485521	0.186663	-0.0860499	0.963995
Kmarxianus_Y179_1369	2	complement(1060951..1062795)	KLMA_20514	TPA1	-0.187645	0.762303	-0.375268	0.179969	0.485013	0.0299473	1.1523	0.000594289	0.599165	0.0332271	0.359747	0.60553
Kmarxianus_Y179_1370	2	1063062..1063565	_	_	-0.890969	0.0578617	0.542281	0.223707	0.57809	0.133553	1.51854	0.00457749	1.60092	0.00100991	0.946685	0.178767
Kmarxianus_Y179_1371	2	complement(1063692..1063967)	KLMA_20515	ISD11	0.548985	0.124565	0.640126	0.00354602	-0.22782	0.240899	-0.338379	0.363237	-0.155674	0.680709	-1.76507	0.00456576
Kmarxianus_Y179_1372	2	1064320..1064769	KLMA_20516	_	-0.234994	0.536877	0.114766	0.684499	0.899544	0.000188957	1.38979	5.24489e-05	1.32947	2.85875e-06	0.713315	0.171936
Kmarxianus_Y179_1373	2	1065310..1066581	KLMA_20517	CAJ1	-0.168775	0.728426	-0.0323558	0.824233	-0.121079	0.542704	-0.490311	0.226242	-0.498665	0.148077	-1.52511	0.03241
Kmarxianus_Y179_1374	2	1066999..1068381	KLMA_20518	TED1	-0.175423	0.659445	-0.0827994	0.675416	-0.110953	0.534103	0.448065	0.219776	0.217919	0.395969	0.400623	0.492295
Kmarxianus_Y179_1375	2	1068707..1071040	KLMA_20519	SAP1	1.11309	0.0075101	0.233013	0.300662	0.0156192	0.9514	0.137869	0.658859	-0.301342	0.354644	-0.61412	0.406056
Kmarxianus_Y179_1376	2	1071586..1072707	KLMA_20520	_	-0.0567781	0.766235	0.620183	0.0942568	-0.149666	0.541949	-1.77937	3.77662e-07	-0.797574	0.00633369	-0.377924	0.538316
Kmarxianus_Y179_1377	2	complement(1072894..1075185)	KLMA_20521	NOT3	0.330382	0.355673	-0.0178057	0.888892	0.255248	0.234437	0.129873	0.716967	0.151273	0.557416	0.628615	0.286969
Kmarxianus_Y179_1378	2	complement(1075563..1077335)	KLMA_20522	_	0.602554	0.100373	0.888022	0.00208742	-0.0582533	0.753588	0.848819	0.0251631	0.529054	0.0683229	1.19503	0.0389618
Kmarxianus_Y179_1379	2	complement(1077723..1078574)	KLMA_20523	SPO73	0.107477	0.772322	1.37628	1.14718e-06	0.101874	0.713415	-0.62194	0.122758	-0.291426	0.341165	-0.467161	0.51985
Kmarxianus_Y179_1380	2	1079789..1081324	KLMA_20524	CST6	0.484132	0.213927	0.233479	0.46233	-0.118104	0.567169	-0.491155	0.224494	-0.485348	0.170706	-0.218222	0.766033
Kmarxianus_Y179_1381	2	<1082146..>1083201	_	_	0.83196	0.0589962	-0.153478	0.742632	0.029888	0.943949	1.54601	0.000180008	1.34375	9.63928e-05	1.52634	0.0100081
Kmarxianus_Y179_1382	2	complement(1083392..1084513)	KLMA_20525	CKA1	-0.183557	0.693134	-0.0420939	0.81487	-0.146903	0.465059	-0.323059	0.402647	-0.21963	0.513127	-0.165153	0.857777
Kmarxianus_Y179_1383	2	complement(1084955..1085794)	KLMA_20526	CAP2	-0.525634	0.173898	-0.108954	0.617562	-0.200275	0.315626	-0.296284	0.392509	-0.268015	0.419324	0.611056	0.240175
Kmarxianus_Y179_1384	2	1086511..1086960	KLMA_20527	ERG28	-0.987166	0.0122856	-0.893575	0.0001755	0.600016	0.00462862	0.362418	0.255371	0.28688	0.263026	0.565639	0.341671
Kmarxianus_Y179_1385	2	complement(1087271..1088671)	KLMA_20528	PKAR	-0.217127	0.652999	-0.00585146	0.937518	-0.232708	0.332878	-0.697765	0.152383	-0.4526	0.254825	-1.17056	0.168237
Kmarxianus_Y179_1386	2	complement(1089205..1091700)	KLMA_20529	IRC5	0.168802	0.64059	-0.173095	0.446119	-0.116401	0.677794	-0.786508	0.0714039	-0.5619	0.12876	-0.274672	0.760775
Kmarxianus_Y179_1387	2	1092101..1093762	KLMA_20530	RSC8	0.0429192	0.85139	0.12951	0.637169	0.347538	0.113619	0.949167	0.00596395	0.721117	0.00866913	1.15794	0.0385648
Kmarxianus_Y179_1388	2	1094025..1094585	KLMA_20531	SRN2	-0.352464	0.334425	0.0920862	0.726217	-0.19607	0.457268	-0.69902	0.0513014	-0.627339	0.0673746	-1.10422	0.068994
Kmarxianus_Y179_1389	2	complement(1094723..1095841)	KLMA_20532	PEX7	-0.190822	0.636189	-0.0813029	0.644146	-0.137651	0.585557	-0.320981	0.416895	0.0843578	0.72665	-0.392172	0.48338
Kmarxianus_Y179_1390	2	complement(1096335..1098545)	KLMA_20533	SAN1	0.54627	0.1527	0.0745553	0.833401	0.263636	0.225932	-0.263165	0.663	0.786294	0.0359832	0.0241921	0.957326
Kmarxianus_Y179_1391	2	complement(1099091..1100893)	KLMA_20534	YPS1	0.869426	0.0383922	0.412642	0.102368	0.432258	0.0591229	0.194999	0.662231	-0.773707	0.0514967	-1.31992	0.167918
Kmarxianus_Y179_1392	2	1101781..1102311	KLMA_20535	PEX4	-0.00552615	0.948678	-0.0120434	0.937431	-0.229136	0.290765	-0.363258	0.356743	-0.286505	0.344589	-1.41233	0.0215682
Kmarxianus_Y179_1393	2	1102471..1102965	KLMA_20536	_	-0.652014	0.0636718	-0.0412945	0.693626	-0.535115	0.011019	-0.636505	0.105085	-0.686	0.0397604	-1.08796	0.0814507
Kmarxianus_Y179_1394	2	complement(1103169..1103753)	KLMA_20537	SUE1	-0.244297	0.466357	0.396433	0.106544	-0.585016	0.00661326	-0.449321	0.233984	-0.433776	0.178591	-1.28585	0.0540906
Kmarxianus_Y179_1395	2	1104665..1108306	KLMA_20538	CAF130	0.579306	0.102584	0.0452511	0.902177	0.114562	0.630882	0.73643	0.0400088	1.04995	0.000653078	1.16038	0.0387085
Kmarxianus_Y179_1396	2	complement(1108299..1109633)	KLMA_20539	URN1	0.0455321	0.846422	0.0993129	0.685643	-0.103205	0.587582	0.142226	0.65109	0.506209	0.0623965	1.01531	0.0626881
Kmarxianus_Y179_1397	2	1109896..1110651	KLMA_20540	PRE9	-0.284534	0.53028	0.0432746	0.924588	0.11781	0.627889	0.527438	0.154774	0.581676	0.0558796	0.815355	0.174983
Kmarxianus_Y179_1398	2	join(1110876..1110880,1110972..1111389)	KLMA_20541	YPR153W	0.465796	0.294352	0.173653	0.717176	-0.154263	0.670598	-0.112745	0.820801	0.289118	0.294979	-0.516773	0.415602
Kmarxianus_Y179_1399	2	1111949..1112623	KLMA_20542	PIN3	-0.336678	0.400235	-0.251369	0.259611	-0.103528	0.691421	-0.39569	0.468919	-0.221553	0.653763	-1.89104	0.0768956
Kmarxianus_Y179_1400	2	complement(1112796..1114604)	KLMA_20543	NCA2	0.11502	0.693058	-0.0700881	0.653855	-0.113824	0.488213	0.0157711	0.954535	-0.390398	0.236797	-1.43686	0.0241707
Kmarxianus_Y179_1401	2	complement(1115631..1117466)	KLMA_20544	TPO3	0.88625	0.0229503	-0.0346831	0.822421	0.0111984	0.97542	0.267789	0.561926	-0.0128467	0.970439	-0.80616	0.351465
Kmarxianus_Y179_1402	2	1119468..1121750	KLMA_20545	CBF2	0.299663	0.338915	-0.153631	0.435173	0.119166	0.633188	0.722151	0.0702049	0.818443	0.014939	0.967539	0.0920871
Kmarxianus_Y179_1403	2	1121918..1123204	KLMA_20546	VPS62	-0.154685	0.692487	-0.301447	0.172772	-0.21716	0.300846	0.119279	0.724315	0.350398	0.225734	-0.215169	0.739376
Kmarxianus_Y179_1404	2	1123689..1124810	KLMA_20547	BTN2	2.18218	4.89904e-07	2.00083	7.39675e-13	0.595319	0.0192401	0.753102	0.137587	1.29775	0.00268827	0.658987	0.530944
Kmarxianus_Y179_1405	2	1126096..1126992	KLMA_20548	_	-0.336093	0.365426	-0.608918	0.00425396	-0.10516	0.583137	-0.561868	0.12608	-0.154615	0.714758	0.00947643	0.924499
Kmarxianus_Y179_1406	2	1128426..1130702	KLMA_20549	KRE6	0.669343	0.0915768	0.0264712	0.969933	0.187099	0.446276	0.351138	0.386004	-0.0711056	0.902622	-0.267145	0.76612
Kmarxianus_Y179_1407	2	1131199..1135488	KLMA_20550	SPP41	1.00797	0.00859155	-0.0631831	0.775138	0.262716	0.187379	0.42611	0.193213	0.174008	0.468875	-0.0711127	0.903192
Kmarxianus_Y179_1408	2	complement(1135802..1137382)	KLMA_20551	CYP707A7	-0.723944	0.217314	-1.11277	7.52957e-05	0.642195	0.00728236	0.130383	0.645229	0.0492066	0.762078	1.07137	0.064831
Kmarxianus_Y179_1409	2	complement(1138014..1139267)	KLMA_20552	RMT2	0.153415	0.493296	0.0751039	0.805432	0.309264	0.159264	1.17791	0.000555491	0.849712	0.00209751	0.463225	0.463553
Kmarxianus_Y179_1410	2	complement(1139591..1140277)	KLMA_20553	SOD2	-0.296565	0.468722	0.7867	0.00332721	-0.62273	0.00623587	-0.708392	0.166206	-0.55862	0.166126	-1.10186	0.192948
Kmarxianus_Y179_1411	2	1141349..1143418	KLMA_20554	PKH3	0.521685	0.164046	-0.0771099	0.667281	0.209512	0.330431	0.225525	0.503959	0.497149	0.100315	-0.184925	0.79495
Kmarxianus_Y179_1412	2	complement(1144142..1145734)	KLMA_20555	TDA3	0.354511	0.373978	-0.000515033	0.964084	0.0682838	0.77979	-0.507444	0.268767	-0.104923	0.836016	0.242609	0.67113
Kmarxianus_Y179_1413	2	complement(1146430..1147239)	_	TLG1	0.533641	0.126575	0.269696	0.284292	0.17152	0.497484	-0.263083	0.604234	0.293448	0.441748	0.826488	0.176095
Kmarxianus_Y179_1414	2	1147412..1147810	_	SDC1	0.792933	0.130571	0.0793385	0.859394	0.14768	0.682986	0.418954	0.421469	0.721358	0.0882047	0.853815	0.208904
Kmarxianus_Y179_1415	2	complement(1147924..1149381)	KLMA_20556	UGO1	-0.233955	0.6044	0.11396	0.621603	-0.0299309	0.817152	-0.448659	0.21254	-0.146589	0.726762	-0.939512	0.121067
Kmarxianus_Y179_1416	2	complement(1149785..1150642)	KLMA_20557	_	-0.147532	0.713587	0.486519	0.0271446	0.171665	0.482015	0.54469	0.149461	0.24523	0.408061	1.12656	0.0491912
Kmarxianus_Y179_1417	2	<1152247..1152627	KLMA_20558	RPL27A	-0.78517	0.0927125	0.290576	0.32958	0.429697	0.0910466	0.627149	0.150235	-0.244306	0.561801	-1.47263	0.0433259
Kmarxianus_Y179_1418	2	1152945..1154279	KLMA_20559	DIA4	0.141713	0.671542	0.169581	0.43418	0.207946	0.418868	-0.676958	0.0575056	-0.163788	0.633602	0.448653	0.392197
Kmarxianus_Y179_1419	2	1154539..>1155462	KLMA_20560	VPS29	-0.39454	0.284199	0.144526	0.542774	-0.184027	0.351148	0.455108	0.173094	0.805538	0.00397314	1.309	0.0202073
Kmarxianus_Y179_1420	2	complement(1156054..1156743)	KLMA_20561	ARD1	-0.36274	0.313828	0.0429063	0.866745	0.0496784	0.896334	0.386015	0.328541	0.185669	0.481604	0.808175	0.185612
Kmarxianus_Y179_1421	2	1157000..1157737	KLMA_20562	TRS31	0.334555	0.392057	0.169035	0.533603	0.117567	0.736515	-0.280228	0.547881	-0.0346412	0.964348	0.971866	0.113215
Kmarxianus_Y179_1422	2	1157737..1158411	_	_	0.0667787	0.802572	0.1319	0.640233	0.168638	0.658765	0.461929	0.324203	0.335833	0.33228	1.11075	0.0648028
Kmarxianus_Y179_1423	2	1158850..1161189	KLMA_20564	ELG1	0.0119105	0.866065	-0.102806	0.599426	0.249005	0.334336	0.828908	0.0353885	0.983183	0.00456678	1.78149	0.00189163
Kmarxianus_Y179_1424	2	complement(1161283..1162272)	KLMA_20565	SPT3	-0.237043	0.514757	0.409651	0.0692639	0.0420183	0.86902	0.185987	0.56906	0.15245	0.524587	0.226904	0.710282
Kmarxianus_Y179_1425	2	1162510..1163448	KLMA_20566	THI80	-0.285684	0.530142	-0.250049	0.240019	-0.0733181	0.750158	-0.341785	0.378975	0.152618	0.562125	0.443846	0.435542
Kmarxianus_Y179_1426	2	complement(1163998..1164954)	KLMA_20568	LSC1	0.509678	0.304744	1.02663	6.11496e-05	-0.218691	0.242819	-1.15518	0.00563269	-1.06439	0.00248801	0.0367403	0.873171
Kmarxianus_Y179_1427	2	1165388..1166014	_	_	-0.692973	0.144609	0.0600821	0.925077	0.506929	0.41568	0.358206	0.534876	0.454275	0.399523	0.647087	0.514609
Kmarxianus_Y179_1428	2	1166308..1168686	KLMA_20571	ARP8	0.953833	0.0266542	0.282324	0.242697	0.0500414	0.859708	0.785649	0.0193043	0.532567	0.0481761	0.444154	0.411858
Kmarxianus_Y179_1429	2	complement(1168860..1171187)	KLMA_20572	SFL1	0.374389	0.311623	-0.0147766	0.883797	-0.0878965	0.651381	0.347454	0.305158	0.289228	0.279618	0.120997	0.825744
Kmarxianus_Y179_1430	2	1172267..1174006	KLMA_20573	RUP1	0.67911	0.0916091	0.312751	0.170398	-0.237586	0.203746	-0.12336	0.73275	-0.47931	0.131529	0.0268969	0.922547
Kmarxianus_Y179_1431	2	1174836..1176575	KLMA_20574	SIA1	0.377848	0.299014	-0.0689205	0.724571	0.324029	0.124238	0.043341	0.871485	-0.454457	0.224421	-1.247	0.0888535
Kmarxianus_Y179_1432	2	complement(1177293..1178399)	KLMA_20575	IDH2	0.0362475	0.869019	0.717722	0.00610755	-0.432706	0.0309699	-0.805555	0.0696503	-0.509967	0.163575	-0.40504	0.57208
Kmarxianus_Y179_1433	2	1179393..1181288	KLMA_20577	UBA2	-0.0925811	0.904994	0.125471	0.647163	0.0487402	0.905149	0.498109	0.158554	0.524216	0.0653958	1.25159	0.027558
Kmarxianus_Y179_1434	2	complement(1181784..1183703)	KLMA_20578	SAC7	0.663613	0.0819421	-0.110749	0.538068	0.392043	0.0656343	0.617272	0.0837967	-0.108365	0.814701	-0.775384	0.343975
Kmarxianus_Y179_1435	2	complement(1185098..1186498)	KLMA_20579	RVS167	-0.389648	0.41305	-0.166206	0.493628	-0.253242	0.263814	-0.476455	0.321337	-0.531585	0.178026	-0.62734	0.453261
Kmarxianus_Y179_1436	2	1187911..1189668	KLMA_20580	YDR387C	-0.352186	0.371021	-0.482578	0.0262078	-0.432682	0.0350121	-0.524767	0.132478	-0.161139	0.675432	-0.531131	0.384826
Kmarxianus_Y179_1437	2	complement(1189793..1191646)	KLMA_20581	MUS81	-0.282361	0.574782	-0.435948	0.168262	0.172382	0.628586	0.1817	0.66594	-0.0684934	0.94809	0.69071	0.234331
Kmarxianus_Y179_1438	2	complement(1192064..1194592)	KLMA_20582	EFT1	0.253741	0.625989	0.271613	0.308995	0.452116	0.100529	-0.343013	0.51354	-0.480541	0.293852	-0.870774	0.359381
Kmarxianus_Y179_1439	2	complement(1195262..1196944)	KLMA_20584	VPS17	0.56289	0.162971	0.0253287	0.941712	0.00932059	0.954468	0.450581	0.172312	0.293865	0.255004	0.334292	0.519499
Kmarxianus_Y179_1440	2	1197404..>1198024	KLMA_20585	YOR131C	-0.635704	0.0751074	-0.112537	0.631461	-0.0502506	0.832453	-0.0943823	0.793442	-0.259124	0.514293	-0.238569	0.671304
Kmarxianus_Y179_1441	2	1200056..1200961	KLMA_20586	ATO2	0.201623	0.58835	-0.0609085	0.817153	-0.0440318	0.797813	-0.519082	0.261569	-1.00386	0.00214702	-2.19431	9.98955e-05
Kmarxianus_Y179_1442	2	1202668..1203480	KLMA_20587	ATO3	-0.854767	0.0372897	-1.20039	1.47675e-07	0.0282517	0.944271	-0.994294	0.0381465	-0.595499	0.0934572	-1.42858	0.0127712
Kmarxianus_Y179_1443	2	1203906..1204538	KLMA_20588	_	-0.138757	0.818668	0.233102	0.318955	0.219899	0.462924	0.195554	0.704278	0.0425498	0.816586	0.713176	0.225285
Kmarxianus_Y179_1444	2	complement(1204793..1205122)	KLMA_20590	RPP2B	-0.744269	0.121075	0.322425	0.279071	0.493264	0.0530123	0.321112	0.470247	-0.345174	0.392163	-1.98407	0.00706621
Kmarxianus_Y179_1445	2	1205758..1206612	KLMA_20591	ORT1	0.376868	0.255192	0.229204	0.388458	0.403126	0.169613	1.23575	0.00306236	0.618294	0.0715812	0.953518	0.138603
Kmarxianus_Y179_1446	2	complement(1206687..1207601)	KLMA_20592	PMP47A	-0.729749	0.0497856	-0.205366	0.280673	-0.174136	0.387933	0.0446595	0.856674	0.2997	0.279054	0.978236	0.0999769
Kmarxianus_Y179_1447	2	complement(<1207908..1208075)	KLMA_20592	PMP47A	-0.998629	0.00451864	0.550408	0.0150673	-0.27151	0.259671	0.229652	0.588648	0.298198	0.289784	-1.0854	0.070028
Kmarxianus_Y179_1448	2	1208584..1208907	KLMA_20593	YDR381C-A	-0.371785	0.199004	0.591703	0.0136321	0.0429318	0.935054	-0.737382	0.0388791	-0.391688	0.22979	-2.55953	0.000117
Kmarxianus_Y179_1449	2	complement(<1209316..1211290)	KLMA_20594	YRA1	0.0427711	0.830821	-0.00126321	0.954426	0.14349	0.609358	0.269607	0.565959	0.184713	0.565924	0.273463	0.753737
Kmarxianus_Y179_1450	2	1211930..1214695	KLMA_20596	AFI1	0.745801	0.0491903	0.33107	0.154425	-0.0339571	0.828382	-0.310916	0.387656	0.17579	0.462593	-0.305723	0.643296
Kmarxianus_Y179_1451	2	complement(1215011..1216903)	KLMA_20597	ARO10	0.929192	0.0106106	1.02275	3.94268e-06	0.992198	4.98383e-06	-0.0228279	0.930532	-0.768306	0.0455475	-0.670463	0.406799
Kmarxianus_Y179_1452	2	1218079..1218612	_	_	0.00862623	0.699843	1.2275	0.163981	1.52559	0.0526721	1.79672	0.0328255	0.353746	0.607845	1.11288	0.172673
Kmarxianus_Y179_1453	2	1218915..1220624	KLMA_20598	ADE2	-0.00541124	0.954023	-0.021051	0.885155	0.169716	0.484644	-0.28026	0.416865	-0.522802	0.0911106	0.234468	0.685889
Kmarxianus_Y179_1454	2	complement(1220773..1223949)	KLMA_20599	_	-0.443395	0.246771	-0.637801	0.00226182	-0.372461	0.065145	-0.168979	0.611812	0.0545075	0.76205	-0.0713398	0.947771
Kmarxianus_Y179_1455	2	complement(1227512..1229152)	KLMA_20600	ugcg-b	0.346832	0.249374	0.044442	0.884413	0.721348	0.000692338	0.856564	0.0116116	-0.00169966	0.982206	0.0564057	0.952282
Kmarxianus_Y179_1456	2	1230016..1230255	_	SDH6	-0.623924	0.0483861	0.0741901	0.789986	-0.348635	0.240973	-0.539796	0.152059	-0.275267	0.470047	-1.38116	0.0299475
Kmarxianus_Y179_1457	2	complement(1230486..1233599)	KLMA_20601	RGA1	0.719487	0.0655609	-0.214907	0.304079	0.0728782	0.750228	0.695135	0.0417083	0.563181	0.0380788	0.448335	0.45616
Kmarxianus_Y179_1458	2	1234893..1235135	KLMA_20602	LSM6	-0.47194	0.114168	0.196769	0.353577	-0.176288	0.476961	0.0256768	0.906031	-0.00238369	0.92751	-1.04945	0.0754404
Kmarxianus_Y179_1459	2	complement(1235797..>1236042)	_	ATP17	-0.397858	0.245847	0.870272	0.00104856	-0.386863	0.0850843	-0.591478	0.209346	-0.253701	0.548091	-1.41632	0.0597849
Kmarxianus_Y179_1460	2	complement(1236893..1238329)	KLMA_20603	ARH1	0.328532	0.312539	0.224177	0.374654	0.0517043	0.877584	-0.865714	0.0145014	0.00673817	0.852915	-0.761936	0.207879
Kmarxianus_Y179_1461	2	1238891..1239616	KLMA_20604	IAH1	0.28133	0.618773	1.28506	2.52697e-06	1.33609	0.000622117	1.12979	0.0214815	0.805432	0.0800611	0.500365	0.42396
Kmarxianus_Y179_1462	2	1239913..1241253	KLMA_20605	BCS1	-0.0176317	0.913339	0.0533177	0.89618	0.340038	0.164116	-0.104956	0.779597	0.184616	0.438307	-0.262945	0.642486
Kmarxianus_Y179_1463	2	complement(1241335..1241595)	KLMA_20606	_	-0.453674	0.182133	0.486264	0.0683381	0.071018	0.862802	-0.450864	0.391602	-0.0756535	0.912197	-0.919106	0.206492
Kmarxianus_Y179_1464	2	1241889..1242689	KLMA_20607	PHO92	-1.1592	0.0202143	-0.226106	0.552451	-0.69163	0.084022	-1.04521	0.0724694	-0.981868	0.0319266	-1.67841	0.0154508
Kmarxianus_Y179_1465	2	1243144..1243992	KLMA_20608	COQ7	-0.713406	0.0487245	-0.231327	0.280116	-0.203108	0.330086	-0.116513	0.726294	-0.217386	0.525661	-0.149647	0.825207
Kmarxianus_Y179_1466	2	complement(1244178..1244750)	KLMA_20609	FRQ1	-0.363489	0.271789	0.0441407	0.919095	-0.345977	0.0826231	-0.863357	0.0232259	-0.632763	0.066236	-1.59465	0.0172003
Kmarxianus_Y179_1467	2	1245898..1249569	KLMA_20610	UBP2	0.496829	0.207114	0.0508216	0.870732	-0.368204	0.0897445	-0.523949	0.159565	-0.536073	0.0979537	-0.245818	0.767678
Kmarxianus_Y179_1468	2	1249947..1250927	KLMA_20611	VPS74	-0.219494	0.616826	-0.00532798	0.945872	-0.15191	0.43658	-0.220351	0.563023	-0.203536	0.568243	0.39688	0.468705
Kmarxianus_Y179_1469	2	complement(1251079..1252521)	KLMA_20612	CTS2	0.45992	0.316368	0.573305	0.132826	0.707621	0.0545832	-0.0826819	0.719104	-1.18447	8.31052e-05	-1.56889	0.00828075
Kmarxianus_Y179_1470	2	1252929..1254170	KLMA_20613	LEO1	0.0236798	0.864006	-0.170244	0.422972	0.217465	0.325915	0.120922	0.674838	0.269696	0.30211	0.779729	0.16662
Kmarxianus_Y179_1471	2	join(1254760..1254772,1255009..1255376)	KLMA_20614	PFY1	-0.703529	0.0620454	0.00483146	1	0.151197	0.544054	-0.245341	0.595078	-0.328536	0.408783	-1.27648	0.0849101
Kmarxianus_Y179_1472	2	complement(1255630..1255941)	KLMA_20615	_	-1.19982	0.00116806	-0.584938	0.00561909	0.20908	0.400444	0.0215104	0.989434	-0.102351	0.860804	-0.0205803	0.999133
Kmarxianus_Y179_1473	2	1257089..1258336	KLMA_20616	DXO1	-0.148397	0.76772	0.184324	0.447203	-0.0273455	0.848535	0.24141	0.483031	-0.400874	0.212698	-0.155947	0.817272
Kmarxianus_Y179_1474	2	1258590..1260023	KLMA_20617	_	-0.029363	0.996305	0.393408	0.0774239	-0.38343	0.0526029	-0.560712	0.136266	-0.011766	0.898485	0.712249	0.168896
Kmarxianus_Y179_1475	2	1260312..1262801	KLMA_20618	XRS2	0.135128	0.648225	-0.0165844	0.870247	-0.24441	0.263822	-0.09797	0.83012	-0.020102	0.979227	-0.253805	0.668165
Kmarxianus_Y179_1476	2	complement(1262979..1263905)	KLMA_20619	YPR1	-0.823947	0.0448205	-0.669198	0.00640662	-0.48033	0.0345595	-0.549203	0.19945	-0.481374	0.182056	-1.30355	0.0534636
Kmarxianus_Y179_1477	2	complement(1264907..1266226)	KLMA_20620	LEM3	0.121355	0.679373	0.59165	0.0118865	-0.273293	0.205066	0.349733	0.318951	0.0877493	0.720969	0.0153302	0.959796
Kmarxianus_Y179_1478	2	1267737..1269356	KLMA_20621	SNG1	0.345024	0.368556	1.12538	1.00297e-06	-0.586743	0.0058159	-0.922128	0.024561	-0.421244	0.229846	-1.08146	0.127365
Kmarxianus_Y179_1479	2	1269727..1272330	KLMA_20622	FIG4	-0.199846	0.657064	-0.312796	0.150289	0.0394468	0.91908	0.325352	0.426913	0.387934	0.214078	0.902242	0.110669
Kmarxianus_Y179_1480	2	complement(1272360..1273076)	KLMA_20623	RRP40	-0.312113	0.299593	-0.124821	0.608451	0.54433	0.109255	0.230991	0.592171	-0.174915	0.667021	-0.430659	0.438949
Kmarxianus_Y179_1481	2	1273389..1274366	KLMA_20624	PFA3	-0.413234	0.297378	-0.30826	0.198024	0.0522921	1	0.787354	0.0837985	0.40986	0.198112	0.59511	0.380889
Kmarxianus_Y179_1482	2	complement(1274608..1276335)	KLMA_20625	EGT2	0.63161	0.17653	-0.466981	0.0698768	-0.0558614	0.69202	-0.229586	0.50982	1.13882	0.000960428	0.837183	0.245681
Kmarxianus_Y179_1483	2	1277794..1278240	KLMA_20626	MDJ2	-0.112197	0.676439	0.38175	0.14307	0.215766	0.530232	-0.464292	0.350083	-0.368989	0.417894	-0.0785491	0.90103
Kmarxianus_Y179_1484	2	1278567..1281566	KLMA_20627	PEX6	0.454462	0.215151	-0.114721	0.558306	0.256258	0.248428	0.93581	0.0125015	1.37037	1.13436e-05	1.84518	0.00146968
Kmarxianus_Y179_1485	2	1281898..1283196	KLMA_20628	RPD3	-0.0818756	0.914887	-0.113879	0.583419	-0.0831159	0.649913	-0.0591511	0.899858	-0.0338417	0.990144	0.141365	0.777871
Kmarxianus_Y179_1486	2	1283627..1284124	KLMA_20629	RIB4	-0.667712	0.052479	0.0434706	0.869239	0.166363	0.484048	-0.145311	0.655925	0.0573305	0.741023	0.924955	0.107505
Kmarxianus_Y179_1487	2	complement(1284218..1285708)	KLMA_20630	NOP8	0.325927	0.253652	-0.332347	0.106705	0.50338	0.0882019	1.02136	0.018738	0.2525	0.417288	0.070538	1
Kmarxianus_Y179_1488	2	1286099..1289422	KLMA_20631	CTR9	0.460159	0.223178	-0.00951762	0.925128	0.24402	0.272176	-0.0439861	0.967962	0.399362	0.12478	0.90575	0.110779
Kmarxianus_Y179_1489	2	complement(1289693..1290259)	KLMA_20632	PSF3	-0.667069	0.0426486	-0.213125	0.403415	0.260299	0.476478	-0.596052	0.140512	0.142605	0.609042	0.733417	0.182795
Kmarxianus_Y179_1490	2	1291218..1291922	KLMA_20634	PEX11	-0.477045	0.184969	0.0680063	0.864902	-0.0296756	0.865748	-1.51366	0.00242919	-0.386929	0.333473	-1.92323	0.0161295
Kmarxianus_Y179_1491	2	1292456..1294186	KLMA_20635	SPT20	0.26769	0.415194	-0.2932	0.178815	0.194801	0.427428	0.583996	0.117432	0.515246	0.0887022	0.996088	0.0798382
Kmarxianus_Y179_1492	2	complement(1294278..1294844)	KLMA_20636	DCP1	-0.614752	0.0814983	0.0273476	0.945738	-0.203113	0.369404	-0.279371	0.415254	-0.223435	0.548448	0.0108809	0.946664
Kmarxianus_Y179_1493	2	1295195..1296172	KLMA_20637	SDL1	-0.476183	0.179929	0.17215	0.450533	-0.572672	0.00464382	-0.797639	0.0231861	-0.369257	0.246543	-0.696584	0.241713
Kmarxianus_Y179_1494	2	complement(1296225..1297940)	KLMA_20638	PLT5	-0.302206	0.510513	0.0462434	0.869207	-0.33223	0.220947	0.326656	0.502411	0.279301	0.393996	0.922846	0.103493
Kmarxianus_Y179_1495	2	complement(1298539..1299108)	KLMA_20639	MGT1	-0.194588	0.69246	-0.364633	0.299668	-0.178174	0.662299	-0.105828	0.917219	0.493224	0.253961	1.25106	0.0477376
Kmarxianus_Y179_1496	2	1299558..1300802	KLMA_20640	PET494	-0.217614	0.626909	0.0801566	0.805932	-0.0322612	0.859142	-0.757959	0.035544	-0.171812	0.651506	-0.822623	0.197124
Kmarxianus_Y179_1497	2	1301417..1302760	KLMA_20641	MSS11	0.260611	0.438087	-0.357046	0.0975525	0.188739	0.57049	0.111879	0.713466	0.450777	0.162758	0.999415	0.0731255
Kmarxianus_Y179_1498	2	1303212..1305236	KLMA_20642	INP2	-0.516591	0.211358	-1.17151	6.50734e-07	0.163458	0.634335	0.0586368	0.979567	1.30799	0.00153501	2.03692	0.00123135
Kmarxianus_Y179_1499	2	complement(1305486..1306898)	KLMA_20643	QRI1	0.345886	0.286678	0.506667	0.0296609	0.743091	0.0152627	0.551689	0.14454	0.399418	0.184282	0.882818	0.117203
Kmarxianus_Y179_1500	2	1307814..1312517	KLMA_20644	DNF3	0.836133	0.0341204	0.20553	0.378559	0.181233	0.397801	0.160543	0.613114	0.0723934	0.75179	0.215672	0.737366
Kmarxianus_Y179_1501	2	complement(1312793..1313527)	KLMA_20645	HLJ1	-0.285966	0.487761	-0.579891	0.00748418	-0.0600354	0.91477	-0.501907	0.239452	-0.327874	0.335492	-0.36847	0.594365
Kmarxianus_Y179_1502	2	complement(1313907..1314647)	_	_	-0.0215745	0.822427	0.906904	0.212539	-0.215078	1	0.361343	0.637603	1.38844	0.066318	0.371525	0.82786
Kmarxianus_Y179_1503	2	1314934..1318239	KLMA_20646	POL3	0.14875	0.637478	-0.509405	0.0153114	0.113844	0.694016	-0.293028	0.411829	-0.108194	0.830349	0.0795832	0.869383
Kmarxianus_Y179_1504	2	complement(1318290..1319540)	KLMA_20647	DUN1	-0.114132	0.783596	0.108003	0.635269	-0.0492048	0.820157	0.339588	0.376941	0.403122	0.165755	1.2658	0.0226407
Kmarxianus_Y179_1505	2	complement(1320174..1322330)	KLMA_20648	YMR160W	0.047931	0.873652	-0.212344	0.345159	0.112509	0.663399	0.502211	0.16012	0.579567	0.0563643	0.408856	0.446395
Kmarxianus_Y179_1506	2	1322702..1323082	KLMA_20649	ATG16	-0.63718	0.065036	0.254353	0.374686	-0.382163	0.353515	-0.744006	0.0894017	-0.306601	0.408212	-2.11001	0.000752303
Kmarxianus_Y179_1507	2	complement(1323592..1324641)	KLMA_20650	GET3	-0.669256	0.0863169	-0.177735	0.426741	0.172486	0.476874	0.415381	0.237071	0.0929511	0.653779	0.639894	0.231444
Kmarxianus_Y179_1508	2	1325173..1326045	KLMA_20651	BUG1	-0.213006	0.555826	-0.0581816	0.778733	-0.245188	0.266846	-0.123912	0.774927	-0.469762	0.142397	-0.244125	0.730364
Kmarxianus_Y179_1509	2	complement(1326363..1326830)	KLMA_20652	MRPS8	-0.341456	0.237723	0.300755	0.162696	-0.0184283	0.877007	-0.884099	0.010671	-0.467736	0.137016	-1.46308	0.0101041
Kmarxianus_Y179_1510	2	1327369..1328022	KLMA_20653	AIM36	-0.349408	0.25803	0.252835	0.242763	0.0091969	0.971149	-0.612893	0.101642	-0.213996	0.554838	-1.47953	0.0153519
Kmarxianus_Y179_1511	2	complement(1328158..1328721)	KLMA_20654	SNU23	-0.736965	0.0560507	0.224589	0.526644	-0.18473	0.601235	-0.436987	0.330307	-0.448318	0.312114	-0.0562786	0.995421
Kmarxianus_Y179_1512	2	1328949..1329665	KLMA_20655	TPP1	-0.323349	0.34771	0.242718	0.378176	-0.36314	0.208017	-0.548396	0.166339	-0.43001	0.24604	-0.268345	0.714055
Kmarxianus_Y179_1513	2	complement(1329716..1330990)	KLMA_20656	RPN6	-0.363686	0.383322	-0.00692745	0.907316	-0.053645	0.767661	0.603935	0.105255	0.485079	0.0972697	1.10818	0.0690174
Kmarxianus_Y179_1514	2	1331791..1334292	KLMA_20657	PMT1	0.454678	0.275288	0.177292	0.571634	0.489395	0.0422104	0.367538	0.320567	0.2873	0.30795	0.928132	0.133125
Kmarxianus_Y179_1515	2	complement(1334481..1336328)	KLMA_20658	YMR155W	0.0656793	0.81521	-0.311622	0.400352	0.374358	0.187507	-0.0659493	0.877906	0.293944	0.295591	1.17633	0.0336487
Kmarxianus_Y179_1516	2	1337574..1339028	KLMA_20659	MSC1	-1.98358	4.50956e-07	-1.19839	3.25061e-05	-1.90884	1.38416e-15	-2.37595	3.16022e-07	-1.70584	2.496e-06	-0.902848	0.221861
Kmarxianus_Y179_1517	2	complement(1339686..>1339772)	_	COX14	0.387641	0.991827	_	_	0.611916	0.731655	0.886554	0.506133	0.604642	0.920139	0.266711	1
Kmarxianus_Y179_1518	2	1339714..1339911	_	COX14	-0.722666	0.0502289	0.0513275	0.910904	0.00114576	0.962427	-0.961846	0.0111324	-0.278559	0.453389	-2.38807	5.68485e-05
Kmarxianus_Y179_1519	2	complement(<1340342..1340917)	KLMA_20660	_	-0.237289	0.461876	0.380422	0.143786	0.124131	0.681292	0.125357	0.75716	0.0783979	0.735573	-0.108175	0.858839
Kmarxianus_Y179_1520	2	1341435..1342187	KLMA_20661	PRE8	-0.38033	0.326339	-0.044273	0.807173	-0.0231774	0.890242	0.302044	0.418314	0.0691141	0.747054	0.785747	0.178347
Kmarxianus_Y179_1521	2	complement(1342467..1345103)	KLMA_20662	UTP14	0.933006	0.0158409	-0.914765	1.72559e-05	0.699943	0.00893284	-0.116265	0.794605	-0.146511	0.67397	-0.62716	0.231615
Kmarxianus_Y179_1522	2	complement(1345522..>1345971)	KLMA_20663	GIM5	-0.437734	0.154546	-0.045688	0.832835	-0.134831	0.590771	-0.22217	0.534377	0.135214	0.579484	0.254304	0.682944
Kmarxianus_Y179_1523	2	1346309..1346980	KLMA_20664	RAD10	-0.189087	0.744214	-0.0465439	0.816873	-0.548022	0.0397152	-0.634624	0.096156	-0.445729	0.214728	-0.573542	0.350092
Kmarxianus_Y179_1524	2	complement(1346984..1348558)	KLMA_20665	YML096W	-0.127281	0.876111	-0.0238405	0.849413	-0.257473	0.26402	-0.108282	0.73813	-0.225053	0.534863	0.302712	0.531599
Kmarxianus_Y179_1525	2	1348927..1350237	KLMA_20666	VPS9	0.0409811	0.82263	0.101988	0.676986	0.0342433	0.91803	0.0826059	0.770394	-0.0323508	0.976985	-0.0570281	0.960344
Kmarxianus_Y179_1526	2	1350580..1352235	KLMA_20667	ERO1	-0.342269	0.452243	-0.338622	0.184138	0.478002	0.053503	1.43147	0.000552295	1.22882	0.000350516	0.970777	0.202698
Kmarxianus_Y179_1527	2	complement(1352421..1352939)	KLMA_20668	TAF13	-0.494515	0.128211	0.208838	0.420166	-0.118452	0.622869	-0.293333	0.431665	0.0603553	0.734653	-0.236326	0.708284
Kmarxianus_Y179_1528	2	1353456..1356236	KLMA_20669	ARG81	0.661244	0.066158	-0.836008	0.00114356	0.858517	0.00115581	0.591863	0.120605	0.663303	0.0205311	1.31045	0.020541
Kmarxianus_Y179_1529	2	1356813..1358234	KLMA_20670	EAR1	-0.174629	0.701742	-0.108845	0.580601	-0.235716	0.289611	0.0400328	0.887992	-0.0742332	0.875999	-0.710095	0.332099
Kmarxianus_Y179_1530	2	complement(1358684..1360225)	KLMA_20671	PHO2	0.251509	0.470895	-0.0234701	0.876238	-0.0150683	1	-0.408442	0.29574	-0.0289592	0.999495	-0.436782	0.528249
Kmarxianus_Y179_1531	2	complement(1360952..1362463)	KLMA_20672	aldA	-0.613893	0.136739	-0.287624	0.136227	-0.130114	0.49896	-1.75758	1.26422e-06	-0.819483	0.00662175	0.170268	0.68679
Kmarxianus_Y179_1532	2	1363754..1365259	KLMA_20673	ALD2	-0.426488	0.275577	-0.542749	0.0180703	-0.294108	0.171387	-0.79754	0.0208178	0.263419	0.301463	1.34844	0.0153869
Kmarxianus_Y179_1533	2	1365585..1367435	KLMA_20674	CEP3	-0.160327	0.730305	-0.055348	0.742866	0.186539	0.60809	0.483095	0.379274	0.420151	0.241298	1.8542	0.00779625
Kmarxianus_Y179_1534	2	complement(1367488..>1369641)	KLMA_20675	MLH1	0.108504	0.68769	-0.18413	0.521556	-0.00491345	0.952566	-0.667676	0.136775	-0.356641	0.391581	-0.0945558	1
Kmarxianus_Y179_1535	2	1369923..1371074	KLMA_20676	NSE4	-0.0750952	0.911532	-0.00118355	0.919561	-0.0834476	0.671967	0.0523219	0.926508	-0.0701986	0.934243	0.223345	0.668184
Kmarxianus_Y179_1536	2	complement(1371162..1372343)	KLMA_20677	gcp	-0.108981	0.808792	0.260813	0.268364	-0.0857345	0.742675	-0.759869	0.0452201	-0.109689	0.84482	-0.656617	0.276874
Kmarxianus_Y179_1537	2	1372945..1374045	KLMA_20678	MME1	-0.159206	0.713763	0.373908	0.0869253	0.0624403	0.795634	-0.398983	0.278264	0.0778488	0.70901	0.71362	0.198225
Kmarxianus_Y179_1538	2	1374622..1377147	KLMA_20679	PAH1	0.325433	0.355767	-0.224886	0.293713	-0.0160013	0.953838	-0.124752	0.79204	0.365037	0.195877	0.997401	0.104205
Kmarxianus_Y179_1539	2	complement(1379834..1383373)	KLMA_50423	TY2B-LR1	-0.498356	0.717661	0.892301	0.331807	0.46976	0.541477	0.0799464	0.81064	1.37391	0.119051	1.38951	0.126496
Kmarxianus_Y179_1540	2	complement(1385860..1388475)	KLMA_20680	YLR001C	0.11507	0.760469	-0.299368	0.125689	-0.081809	0.644817	-0.0287998	0.941023	0.326235	0.244998	0.725037	0.175393
Kmarxianus_Y179_1541	2	1389408..1391294	KLMA_20681	AVT1	0.183893	0.583614	-0.0700084	0.699741	-0.129284	0.490384	-0.113952	0.782413	-0.186478	0.622278	0.381358	0.476514
Kmarxianus_Y179_1542	2	1391716..1393575	KLMA_20682	MPP10	0.30516	0.353494	-0.397607	0.0646015	0.843539	0.00152393	0.61054	0.0769991	0.0397702	0.849898	-0.490271	0.301975
Kmarxianus_Y179_1543	2	complement(1393690..1395669)	KLMA_20683	NOC3	0.351624	0.248006	-0.854873	3.32525e-05	1.20667	0.000448016	0.667948	0.124241	0.0539378	0.794066	0.380247	0.600812
Kmarxianus_Y179_1544	2	1396064..1396711	KLMA_20684	_	-0.345353	0.400865	-0.440437	0.144149	0.414995	0.39264	0.291473	0.619822	0.845771	0.0794097	1.676	0.0146921
Kmarxianus_Y179_1545	2	complement(1396792..1398351)	KLMA_20685	MRX12	0.137456	0.650308	0.451958	0.0447154	-0.316203	0.118542	-0.209993	0.533132	-0.140609	0.756487	0.639055	0.303931
Kmarxianus_Y179_1546	2	complement(1398947..1399348)	KLMA_20686	YJR012C	-0.392757	0.242514	-0.104837	0.707292	0.0082667	0.969844	-0.371645	0.408021	-0.207017	0.692376	0.22902	0.676404
Kmarxianus_Y179_1547	2	1399591..1400799	KLMA_20687	GPI14	-0.165042	0.652028	-0.00710304	0.989971	0.149981	0.636451	0.571863	0.191116	0.411251	0.278588	1.03327	0.0960013
Kmarxianus_Y179_1548	2	1401134..1401871	KLMA_20688	SKI6	-0.235612	0.49647	-0.13303	0.442427	0.27029	0.378046	0.709624	0.0535873	-0.0108338	0.956885	0.021145	0.97152
Kmarxianus_Y179_1549	2	complement(1401926..1404328)	KLMA_20689	FYV8	0.205744	0.509292	0.181585	0.460828	0.26851	0.237981	0.289451	0.48208	0.395886	0.130824	1.23305	0.0260444
Kmarxianus_Y179_1550	2	complement(1404773..1406551)	KLMA_20690	SMF2	0.806477	0.037574	0.102025	0.71249	0.369374	0.0810428	0.808935	0.0151072	1.23258	1.29289e-05	1.53705	0.0128481
Kmarxianus_Y179_1551	2	1408067..1410106	KLMA_20691	GRP78	0.182097	0.60099	-0.13091	0.564032	0.745762	0.00384812	0.844973	0.0746332	1.27335	0.00107382	0.71242	0.432147
Kmarxianus_Y179_1552	2	complement(1410914..1411525)	KLMA_20692	PML1	-0.31244	0.348725	-0.291682	0.275251	0.241722	0.448553	1.26607	0.00419554	1.10811	0.00179884	2.18944	0.00021436
Kmarxianus_Y179_1553	2	1411904..1414234	KLMA_20693	DBP4	0.79302	0.0216763	-0.800565	9.20072e-05	0.827088	0.000611065	1.03072	0.00195794	0.966372	0.000694591	1.03402	0.0909165
Kmarxianus_Y179_1554	2	1414631..1415602	KLMA_20694	CTK2	-0.192938	0.555664	0.119266	0.637523	0.12421	0.723252	0.872397	0.0523591	0.987974	0.00671491	1.25475	0.0431657
Kmarxianus_Y179_1555	2	complement(1415647..>1416627)	KLMA_20695	BET4	-0.674878	0.043377	0.019103	0.987158	-0.340615	0.166133	-0.251706	0.462622	-0.271884	0.490956	0.330849	0.532231
Kmarxianus_Y179_1556	2	1416939..1417532	KLMA_20696	MAD2	0.0651085	0.797558	-0.0777781	0.729673	0.0420067	0.947636	0.368026	0.456938	0.477483	0.279319	1.70619	0.00867951
Kmarxianus_Y179_1557	2	complement(1417672..1418289)	KLMA_20697	_	-0.0267148	0.910001	-0.152342	0.642303	-0.0715033	0.768074	0.770393	0.129504	0.585548	0.141875	1.26395	0.0487877
Kmarxianus_Y179_1558	2	complement(1418621..1421032)	KLMA_20698	VPS53	0.430804	0.251655	0.0273565	0.981878	-0.0233771	0.858729	0.153154	0.633977	0.127592	0.551187	0.814661	0.136195
Kmarxianus_Y179_1559	2	1421731..1423446	KLMA_20699	CCT8	0.208853	0.544317	0.14297	0.617133	0.266767	0.234692	0.479989	0.151633	0.0426963	0.771746	1.1192	0.0489493
Kmarxianus_Y179_1560	2	1424290..1427433	KLMA_20700	SAK1	0.445495	0.222906	0.0298262	0.978573	0.397968	0.0685868	0.953437	0.00544356	1.17697	4.00284e-05	1.91802	0.000998643
Kmarxianus_Y179_1561	2	complement(1427528..1432090)	KLMA_20701	CDC25	0.0826604	0.876747	-0.441371	0.029462	-0.0240028	0.85592	-0.449021	0.229367	-0.0311025	0.949349	0.401846	0.503815
Kmarxianus_Y179_1562	2	complement(1432551..>1432847)	KLMA_20702	SMD2	-0.431765	0.127831	0.246921	0.304225	-0.327119	0.201806	-0.247625	0.438121	-0.183927	0.642619	-0.293517	0.662981
Kmarxianus_Y179_1563	2	complement(1433177..1435417)	KLMA_20703	MCM5	0.310304	0.36861	-0.0262401	0.887149	-0.29984	0.180898	0.120897	0.766061	0.209547	0.428125	0.155203	0.696484
Kmarxianus_Y179_1564	2	1439030..1441336	KLMA_20704	GAC1	-0.0673358	0.918101	-0.0514924	0.751939	-1.24369	9.19647e-06	-1.03256	0.00417638	-1.12151	0.00151741	-2.1374	0.00473124
Kmarxianus_Y179_1565	2	1442176..1442586	KLMA_20705	_	-0.727023	0.379268	0.171998	1	0.175318	0.753335	-0.190708	0.659609	0.384129	0.287679	0.442768	0.488912
Kmarxianus_Y179_1566	2	complement(1444016..1444918)	KLMA_20706	CDC34	0.261093	0.467586	-0.0944606	0.625796	-0.19315	0.367917	-0.684383	0.0741255	-0.452966	0.174766	-1.7386	0.0159029
Kmarxianus_Y179_1567	2	1446845..1448548	KLMA_20707	MDM36	1.00353	0.0166817	0.912089	8.48979e-05	-0.413256	0.0394953	-0.675936	0.073511	-0.276299	0.424873	0.187412	0.717471
Kmarxianus_Y179_1568	2	complement(1448846..1450396)	KLMA_20708	VMA2	-0.0651357	0.965468	-0.184446	0.465415	-0.11459	0.605517	-0.183044	0.68658	-0.0614809	0.951639	0.456806	0.420254
Kmarxianus_Y179_1569	2	complement(1450849..1451766)	KLMA_20709	ATG14	-0.0431422	0.983081	-0.29351	0.25975	0.0847364	0.611732	0.30881	0.313666	0.536198	0.0504962	0.526558	0.324375
Kmarxianus_Y179_1570	2	1452165..1453523	KLMA_20710	YPR084W	-0.0165543	0.964947	-0.309682	0.135813	0.135922	0.555458	0.499384	0.142779	0.406959	0.116632	0.514008	0.349861
Kmarxianus_Y179_1571	2	complement(1453548..1454813)	KLMA_20711	ASA1	-0.0774636	0.822263	0.0770001	0.798023	0.147506	0.656515	1.33591	0.00222686	0.727512	0.0304033	1.0884	0.0755838
Kmarxianus_Y179_1572	2	complement(1454990..1455907)	KLMA_20712	OPY1	-0.394123	0.22615	0.0424549	0.897287	0.307234	0.281669	0.221958	0.501339	-0.176283	0.636863	-0.987898	0.087407
Kmarxianus_Y179_1573	2	complement(1456388..1457455)	KLMA_20713	SHE3	-0.201685	0.677834	-0.450165	0.0315541	0.304251	0.187347	0.23335	0.464315	0.767208	0.00666483	1.33422	0.0158377
Kmarxianus_Y179_1574	2	complement(1457862..1459463)	KLMA_20714	SRP54	-0.290489	0.530688	-0.212298	0.330289	0.299806	0.167175	-0.301851	0.417084	-0.0281021	0.992338	0.527065	0.328904
Kmarxianus_Y179_1575	2	1459848..1461725	KLMA_20715	CCZ1	-0.00676911	0.950666	-0.0568162	0.794743	-0.120746	0.601554	-0.441648	0.266736	-0.110784	0.846389	0.723673	0.191209
Kmarxianus_Y179_1576	2	complement(1461825..1462520)	KLMA_20716	_	0.256964	0.556554	-0.246564	0.604107	0.20356	0.640482	0.230206	0.618714	-0.71683	0.0251162	-1.26235	0.0333386
Kmarxianus_Y179_1577	2	1464009..1464593	_	ADD37	-0.567234	0.134962	0.141	0.68417	-0.316908	0.315444	-0.219357	0.694029	-0.29546	0.340932	-2.3294	8.34296e-05
Kmarxianus_Y179_1578	2	complement(1464684..1465523)	KLMA_20717	SUI3	-0.0275684	0.977399	0.302634	0.311828	0.207559	0.385631	0.0412508	0.923142	-0.221404	0.564428	-1.05149	0.127382
Kmarxianus_Y179_1579	2	complement(1466014..1466619)	KLMA_20720	YAR1	0.0599182	0.76885	-0.225697	0.258952	0.926477	0.00526479	0.504666	0.221965	-0.193832	0.620991	-0.558147	0.344015
Kmarxianus_Y179_1580	2	1466968..1469883	KLMA_20721	RTP1	0.569718	0.10605	-0.362563	0.07204	0.148141	0.634626	-0.235297	0.467884	0.0606902	0.711871	-0.185199	0.672516
Kmarxianus_Y179_1581	2	complement(1470299..1471624)	KLMA_20722	ERG9	-0.418683	0.37716	-0.596989	0.0273278	0.278706	0.21888	-0.133167	0.727224	-0.192854	0.576723	0.10422	0.834424
Kmarxianus_Y179_1582	2	complement(1472572..1473141)	KLMA_20723	maa	-1.61709	0.000227838	-0.891467	0.00517255	-0.738512	0.00997184	-1.15592	0.000958281	-0.397623	0.203974	-1.63952	0.00570867
Kmarxianus_Y179_1583	2	1474173..1475198	KLMA_20724	NSE3	-0.255264	0.587174	-0.166952	0.389951	0.244009	0.38494	0.290771	0.496973	0.34152	0.277955	0.3683	0.541229
Kmarxianus_Y179_1584	2	1475946..1478003	KLMA_20725	NCP1	-0.308881	0.573896	-1.09679	8.74949e-05	0.37279	0.087951	0.600822	0.0659788	0.370596	0.157045	1.59047	0.00636124
Kmarxianus_Y179_1585	2	1478446..>1478892	KLMA_20726	DTD1	-0.825537	0.0362135	-0.581319	0.00822717	0.487915	0.0395631	0.209807	0.599036	0.397047	0.170425	0.328525	0.576103
Kmarxianus_Y179_1586	2	1479332..>1480525	KLMA_20727	DUG3	0.097964	0.671879	0.150593	0.621367	0.280479	0.254777	0.861744	0.0103678	0.851527	0.00309246	-0.689584	0.301874
Kmarxianus_Y179_1587	2	1481412..1481906	KLMA_20728	YNL190W	0.0197937	0.871519	0.14676	0.654093	-0.130633	0.542986	-0.677199	0.149765	-0.411796	0.311859	-2.08279	0.0254212
Kmarxianus_Y179_1588	2	1483539..1485155	KLMA_20729	SRP1	0.0745151	0.746492	-0.0637727	0.778255	0.157072	0.499959	0.194481	0.575585	0.206694	0.456862	0.0163011	0.971425
Kmarxianus_Y179_1589	2	1485529..1486338	KLMA_20730	KAR1	-0.0884508	0.960653	0.0537164	0.806626	0.63133	0.11627	0.990382	0.078714	0.523677	0.313335	0.596714	0.363848
Kmarxianus_Y179_1590	2	complement(1486396..1486986)	KLMA_20731	TIM22	-0.236414	0.429168	0.131125	0.639106	0.141877	0.683972	-0.294971	0.407793	0.317478	0.254143	-0.398193	0.485407
Kmarxianus_Y179_1591	2	1487259..1488524	KLMA_20732	SWT21	0.181276	0.653154	0.0101197	0.942867	-0.229454	0.378965	0.82685	0.0882373	0.818942	0.0365709	1.59718	0.0136437
Kmarxianus_Y179_1592	2	complement(1488508..1489650)	KLMA_20733	RRI1	0.230245	0.550281	-0.253826	0.338308	0.182177	0.650775	0.0132606	0.973184	0.790372	0.102481	0.796964	0.254151
Kmarxianus_Y179_1593	2	complement(1490052..1493156)	KLMA_20734	GDH2	0.265375	0.610827	-0.228548	0.437729	-0.671028	0.00264548	-1.03734	0.0388054	-0.377156	0.397549	-1.70879	0.0662532
Kmarxianus_Y179_1594	2	1495699..1498014	KLMA_20735	UBP10	0.453188	0.177826	-0.41065	0.0692276	0.454498	0.0953818	-0.346158	0.309911	-0.371248	0.253136	-1.52585	0.0133781
Kmarxianus_Y179_1595	2	complement(1498315..1498764)	KLMA_20736	rplK	-0.318147	0.303456	0.516712	0.0195519	0.13751	0.643473	-0.551493	0.121943	-0.391315	0.234794	-1.18591	0.0393955
Kmarxianus_Y179_1596	2	complement(1499254..1501641)	KLMA_20737	NPR1	0.658989	0.113793	-0.0350047	0.889823	-0.0484082	0.775465	0.299005	0.337572	0.0914629	0.75688	0.0194975	0.961947
Kmarxianus_Y179_1597	2	complement(1502997..1503656)	KLMA_20738	NOP6	0.518427	0.100637	-0.394251	0.0500306	0.434584	0.190078	0.067985	0.856406	-0.375682	0.249701	-2.00189	0.000602253
Kmarxianus_Y179_1598	2	complement(1503997..1505529)	KLMA_20739	IPI3	0.247914	0.364541	-0.627475	0.00174468	1.07313	0.000916596	0.778132	0.043434	0.128598	0.589509	0.0702004	0.949703
Kmarxianus_Y179_1599	2	1505861..1507114	KLMA_20740	YNL181W	-0.141669	0.757427	-0.241711	0.250039	0.135758	0.550901	0.0267542	0.955463	0.105433	0.645755	1.08956	0.0572324
Kmarxianus_Y179_1600	2	complement(<1507838..>1508443)	KLMA_20741	ced-10	-0.29652	0.507671	-0.0340294	0.793935	-0.0644095	0.766464	-0.639707	0.0713385	-0.239003	0.514483	-0.563862	0.464539
Kmarxianus_Y179_1601	2	1510498..1511211	KLMA_20742	RPS3	-0.295498	0.566859	0.296815	0.296476	0.8106	0.000684937	0.69656	0.0883264	-0.402037	0.299982	-1.8782	0.0148574
Kmarxianus_Y179_1602	2	1511676..1512290	KLMA_20744	SHR3	-0.40305	0.348974	-0.45757	0.043178	0.168753	0.514132	-0.633471	0.061417	-0.710827	0.0191083	-1.05044	0.0772352
Kmarxianus_Y179_1603	2	complement(1512468..1513364)	KLMA_20745	MRPL22	-0.222428	0.582591	0.276602	0.283616	0.145649	0.514539	-0.78322	0.0502484	-0.381511	0.267021	-1.24076	0.0471368
Kmarxianus_Y179_1604	2	complement(1513847..1515136)	KLMA_20746	TDA7	0.450254	0.211108	-0.207844	0.31502	0.271937	0.213221	0.454924	0.183586	-0.0316275	0.991856	-0.922438	0.195978
Kmarxianus_Y179_1605	2	complement(1515667..1516839)	KLMA_20747	NOP13	0.372239	0.228749	-0.721344	0.000370131	0.675387	0.00570123	0.883502	0.0076146	0.419778	0.118106	0.827721	0.167976
Kmarxianus_Y179_1606	2	complement(1517468..1518853)	KLMA_20749	CRP1	0.377733	0.322396	0.234446	0.420511	0.0393897	0.903851	-0.0371872	0.95959	0.0116835	0.925323	-0.46416	0.577021
Kmarxianus_Y179_1607	2	1520570..1525567	KLMA_20750	APC1	0.599875	0.0990079	-0.0176834	0.888298	0.265391	0.268847	-0.0486882	0.896778	-0.0145831	0.908798	0.54981	0.316376
Kmarxianus_Y179_1608	2	complement(1525800..1527353)	KLMA_20751	PSD1	0.426428	0.220511	-0.156737	0.449566	0.430391	0.0402045	0.455385	0.198703	0.698618	0.0111802	0.779371	0.177366
Kmarxianus_Y179_1609	2	1527814..1528776	KLMA_20752	DCD1	-0.267873	0.488809	-0.0278745	0.880181	0.800602	0.00226676	0.448272	0.173131	0.416757	0.162959	0.52077	0.333624
Kmarxianus_Y179_1610	2	complement(1528870..1529661)	KLMA_20753	FMP41	-0.440468	0.188501	0.389592	0.0925769	-0.905371	1.05591e-05	-0.458183	0.187148	0.0117932	0.895358	0.928397	0.0953133
Kmarxianus_Y179_1611	2	complement(1530182..1531879)	KLMA_20754	SKO1	0.0471761	0.799658	-0.118711	0.528111	0.194697	0.343079	-0.0521918	0.921656	0.0984598	0.696787	0.270221	0.598764
Kmarxianus_Y179_1612	2	complement(1532461..1532673)	KLMA_20755	RPC10	0.11639	0.621935	0.11047	0.706895	0.774617	0.0115707	0.466065	0.16563	-0.189867	0.563007	-1.71886	0.00398543
Kmarxianus_Y179_1613	2	complement(1533083..1534210)	KLMA_20756	BNI5	0.186243	0.560398	0.269479	0.249967	-0.0488885	0.790588	0.317744	0.355293	0.162714	0.546727	-0.90317	0.156922
Kmarxianus_Y179_1614	2	1534521..1535609	KLMA_20757	YNL165W	-0.23746	0.514743	-0.12059	0.522191	0.00589694	1	-0.331422	0.345892	-0.292642	0.355325	-0.493059	0.424356
Kmarxianus_Y179_1615	2	complement(1535886..1536536)	KLMA_20758	DSE2	0.0456677	0.833301	0.744632	0.00292643	-0.0941777	0.533621	0.925907	0.00604918	1.29506	1.48418e-05	1.22455	0.0490215
Kmarxianus_Y179_1616	2	complement(1537403..1538446)	KLMA_20759	IBD2	0.0618268	0.786657	-0.026059	0.801179	0.266762	0.417018	-0.0832035	0.937257	-0.144307	0.724262	-0.39948	0.522277
Kmarxianus_Y179_1617	2	complement(1538776..1542204)	KLMA_20760	RIA1	0.458955	0.207054	-0.177737	0.423166	0.141489	0.567992	0.324143	0.363649	0.454463	0.0846714	0.192772	0.806385
Kmarxianus_Y179_1618	2	1542487..1542708	_	YNL162W-A	-0.630159	0.0821746	0.0754188	0.889158	0.41086	0.340932	0.577039	0.296578	0.115819	0.744933	-2.04463	0.00115877
Kmarxianus_Y179_1619	2	complement(1542909..1543862)	KLMA_20761	CHS7	-0.121187	0.844629	-0.352911	0.0792086	0.0914907	0.838051	0.297747	0.449827	0.124526	0.566056	-0.843165	0.129808
Kmarxianus_Y179_1620	2	join(1544748..1544751,1545181..1545497)	KLMA_20762	RPL44	-0.681176	0.161455	0.208183	0.465487	0.38224	0.148026	0.452285	0.335714	-0.41107	0.312961	-1.95354	0.0177681
Kmarxianus_Y179_1621	2	1545950..1548211	KLMA_20764	CBK1	0.467433	0.22577	0.031598	0.967652	0.221838	0.307803	0.351374	0.276343	0.473316	0.0762686	0.802564	0.165722
Kmarxianus_Y179_1622	2	complement(1548991..1549659)	KLMA_20765	YHR140W	-0.514348	0.175675	-0.2101	0.326739	0.127424	0.600173	-0.473404	0.200707	-0.406705	0.208148	-1.08215	0.0731126
Kmarxianus_Y179_1623	2	1551628..1553109	KLMA_20766	MEP2	0.527696	0.141983	0.491342	0.065672	-0.101834	0.654815	0.396195	0.306031	-1.12293	0.000186794	-1.91563	0.00125397
Kmarxianus_Y179_1624	2	1553812..1554339	KLMA_20767	YLR050C	-0.276067	0.48834	-0.0565593	0.776122	0.0694094	0.874241	-0.271783	0.613251	-0.1802	0.729368	0.654804	0.386659
Kmarxianus_Y179_1625	2	1554471..1554938	KLMA_20768	GNA1	-0.450426	0.21688	-0.270457	0.224071	-0.125135	0.509701	-0.483224	0.173707	-0.430216	0.165912	-0.49313	0.428338
Kmarxianus_Y179_1626	2	complement(1554989..>1555189)	KLMA_20769	SMX2	-0.501917	0.136357	0.263966	0.295253	-0.0226315	0.854856	0.300253	0.491036	0.139698	0.70296	-0.870811	0.202937
Kmarxianus_Y179_1627	2	complement(1555676..1557076)	KLMA_20770	MDJ1	0.710405	0.0391067	0.382767	0.0798177	0.472033	0.0371499	-0.0425502	0.955067	0.808171	0.0220563	0.172257	0.827369
Kmarxianus_Y179_1628	2	1558582..1558896	KLMA_20771	HSP12	-2.57407	9.17423e-11	-0.581874	0.0297281	-2.28997	4.42521e-25	-2.80407	1.68401e-07	-1.64685	8.876e-05	-1.61732	0.0532296
Kmarxianus_Y179_1629	2	1559192..1560052	KLMA_20772	_	-0.401935	0.245609	0.126297	0.635955	0.022061	1	0.0693635	0.851905	0.27996	0.345152	0.369209	0.532894
Kmarxianus_Y179_1630	2	complement(1560084..1562168)	KLMA_20773	IES1	0.14517	0.655573	-0.0315025	0.864937	-0.0413069	0.789452	0.19324	0.581302	0.212119	0.395452	0.0140814	0.987356
Kmarxianus_Y179_1631	2	complement(1562848..1563945)	KLMA_20774	dao1	-0.483688	0.188776	-0.0239379	0.888819	-0.231062	0.304615	-0.625754	0.0802741	0.0254429	0.812023	-0.303713	0.584131
Kmarxianus_Y179_1632	2	1564937..1566901	KLMA_20775	CDC4	0.221309	0.506189	-0.194845	0.353396	-0.0310368	0.84579	-0.276312	0.48175	-0.187976	0.6078	-0.613729	0.387093
Kmarxianus_Y179_1633	2	1567698..1568111	KLMA_20776	_	-0.279126	0.56184	-0.715554	0.038137	0.106902	0.853365	-1.60865	2.48743e-05	-1.53839	7.18644e-06	-2.49985	0.000245071
Kmarxianus_Y179_1634	2	1568910..1572638	KLMA_20777	SMC1	0.169246	0.587278	-0.245152	0.247223	-0.00331506	0.934068	-0.555279	0.122088	-0.745076	0.0145053	-0.2869	0.679153
Kmarxianus_Y179_1635	2	complement(1572915..1574162)	KLMA_20778	KES1	-0.0667858	0.953494	0.100837	0.750007	-0.100302	0.577179	-0.196596	0.589784	-0.528261	0.109953	-0.0920916	0.940339
Kmarxianus_Y179_1636	2	complement(1574872..1575552)	KLMA_20779	DFR1	-0.419817	0.317752	-0.126109	0.59341	-0.236582	0.444805	0.634506	0.120333	0.746897	0.0291132	2.00019	0.000614909
Kmarxianus_Y179_1637	2	1575790..1576251	KLMA_20780	POC4	-0.19148	0.887683	-0.656553	0.0972757	-0.0680527	0.815923	0.495279	0.287782	0.552267	0.142178	1.04415	0.116109
Kmarxianus_Y179_1638	2	1577231..1579321	KLMA_20781	YUC8	-0.619634	0.182714	0.115775	0.957137	0.0479984	0.94258	-0.0826123	0.8195	-0.526941	0.0958813	-0.587329	0.291371
Kmarxianus_Y179_1639	2	<1581773..1582078	KLMA_20783	RPL33B	-0.950111	0.0315435	0.226393	0.447396	0.419516	0.0985671	0.72406	0.093134	-0.200237	0.641573	-1.46638	0.033522
Kmarxianus_Y179_1640	2	complement(1582373..1585075)	KLMA_20784	FRK1	0.636753	0.0931913	-0.329212	0.114192	0.0436558	0.937441	0.111098	0.780133	0.152952	0.526167	0.487568	0.361108
Kmarxianus_Y179_1641	2	complement(1585853..1586623)	KLMA_20785	mge1	-0.179562	0.623845	0.335179	0.169625	0.0805298	0.731594	-0.874646	0.0353775	-0.245477	0.517863	-1.52736	0.0234416
Kmarxianus_Y179_1642	2	complement(1586929..1588446)	KLMA_20786	MKK1	0.136622	0.652019	0.126	0.614763	-0.246999	0.226514	0.307099	0.357862	0.204781	0.396722	0.444095	0.405211
Kmarxianus_Y179_1643	2	complement(1589356..1590723)	KLMA_20787	WTM2	-0.48025	0.215312	-0.0190581	0.912756	-0.191371	0.308827	-0.0757666	0.854839	0.132713	0.563009	0.884631	0.108527
Kmarxianus_Y179_1644	2	complement(1591020..1592111)	KLMA_20788	SPP1	-0.0990675	0.756741	0.604383	0.0116847	0.0509521	0.88235	0.237442	0.553284	-0.0659388	0.864361	0.227499	0.655064
Kmarxianus_Y179_1645	2	1592376..1593239	KLMA_20789	MCP1	-0.490614	0.184965	0.277152	0.284273	-0.476718	0.043152	-0.638388	0.0602092	-0.593546	0.0591843	-0.717917	0.224122
Kmarxianus_Y179_1646	2	complement(1593366..1597130)	KLMA_20790	GIP3	0.279367	0.541031	-0.301855	0.225649	0.00670346	0.947865	0.331788	0.365211	0.183275	0.45679	0.24089	0.655694
Kmarxianus_Y179_1647	2	complement(1597629..1598450)	_	_	0.00806108	0.705054	0.47903	0.31812	-0.00970525	0.997976	0.483168	0.421245	0.284939	0.580768	-0.737493	0.325318
Kmarxianus_Y179_1648	2	1598902..1599438	KLMA_20791	ISU1	-0.166163	0.632057	0.220527	0.417647	0.102262	0.683614	-0.566756	0.167484	-0.346422	0.353223	-1.81497	0.00964542
Kmarxianus_Y179_1649	2	1600086..1600523	KLMA_20792	RPB8	-0.357535	0.379313	-0.0104309	0.896213	0.53783	0.0355754	0.73679	0.0343254	0.690715	0.0114104	0.609136	0.311813
Kmarxianus_Y179_1650	2	1601033..1601686	KLMA_20793	_	-0.656198	0.072271	-0.0756272	0.660605	-0.55082	0.0100997	-0.409064	0.297241	-0.333925	0.315708	-0.0672083	0.915171
Kmarxianus_Y179_1651	2	complement(1601831..1602571)	KLMA_20794	DSC3	-0.739006	0.039237	-0.298193	0.138185	0.0254738	0.933063	-0.161557	0.657984	-0.0426073	0.995929	0.878287	0.119815
Kmarxianus_Y179_1652	2	complement(1603562..1604458)	KLMA_20795	ODC2	-0.1878	0.591333	0.152256	0.58828	0.22277	0.357031	-0.138809	0.720547	0.0949169	0.651393	0.449025	0.434117
Kmarxianus_Y179_1653	2	1605675..1606631	KLMA_20796	MCT1	-0.409686	0.2491	-0.0410638	0.827085	0.184038	0.502904	0.75217	0.0554992	0.28879	0.282506	0.816239	0.162007
Kmarxianus_Y179_1654	2	complement(1606706..1608145)	KLMA_20797	RDS2	-0.214709	0.686537	0.509528	0.120337	-0.621822	0.0129596	-0.899897	0.0128762	-0.319675	0.311525	-1.14286	0.0553102
Kmarxianus_Y179_1655	2	1608419..1609198	KLMA_20798	COX11	-0.403525	0.245419	0.167016	0.46592	-0.0347409	0.835335	-0.706107	0.0388424	-0.269177	0.44476	-0.329252	0.535734
Kmarxianus_Y179_1656	2	complement(1609522..1610289)	KLMA_20799	RCN2	0.891359	0.0189708	0.140599	0.474786	-0.0122874	0.94336	0.0332328	0.957734	-0.618315	0.11923	-0.921773	0.3092
Kmarxianus_Y179_1657	2	1612022..1612915	KLMA_20800	RPL5	0.13374	0.737951	0.28402	0.316768	0.519984	0.0395847	-0.027141	0.987782	-0.615994	0.134441	-1.82294	0.0365592
Kmarxianus_Y179_1658	2	1613450..1616065	KLMA_20801	STE13	0.413436	0.217742	-0.344192	0.124887	0.297104	0.196724	0.453614	0.204413	0.444135	0.0924216	1.18007	0.032289
Kmarxianus_Y179_1659	2	complement(1616094..1618583)	KLMA_20802	RFC1	0.34547	0.345161	0.233055	0.34915	-0.0912135	0.611168	-0.343145	0.341202	-0.0319559	0.96227	0.821921	0.13319
Kmarxianus_Y179_1660	2	1618994..1620445	KLMA_20803	RUD3	-0.213254	0.623143	-0.0311277	0.849726	0.102851	0.669078	0.636984	0.119479	0.707252	0.0321956	1.39855	0.0147388
Kmarxianus_Y179_1661	2	1620798..1621358	KLMA_20804	AIM41	_	_	_	_	_	_	_	_	_	_	_	_
Kmarxianus_Y179_1662	2	1620798..1621358	KLMA_20804	AIM41	_	_	_	_	_	_	_	_	_	_	_	_
Kmarxianus_Y179_1663	2	1620798..1621358	KLMA_20804	AIM41	_	_	_	_	_	_	_	_	_	_	_	_
Kmarxianus_Y179_1664	2	1622098..1622775	KLMA_20805	TAF14	-0.516996	0.166912	-0.146864	0.508968	-0.0525036	0.734704	-0.190841	0.586359	-0.319511	0.329958	-0.716553	0.214372
Kmarxianus_Y179_1665	2	1623499..1623915	_	TAF14	-0.288044	0.559367	0.0636168	0.908424	-0.238982	0.334807	-0.936927	0.0237121	-0.493875	0.242381	-0.628822	0.311857
Kmarxianus_Y179_1666	2	complement(1624011..1625291)	KLMA_20806	STE4	0.218689	0.493301	-0.12822	0.509616	-0.397169	0.047624	-1.60422	5.70118e-06	-0.897299	0.00707739	-0.612943	0.314628
Kmarxianus_Y179_1667	2	complement(1626044..1627549)	KLMA_20807	TBF1	0.712873	0.031306	-0.316872	0.136783	0.288209	0.278512	0.722694	0.054713	0.0490192	0.789003	-0.486696	0.323446
Kmarxianus_Y179_1668	2	complement(<1629114..>1629308)	_	HHO1	-0.291213	0.454932	-0.116615	0.554013	0.0540063	0.925435	-0.63401	0.124662	-0.308027	0.33528	-0.561667	0.472324
Kmarxianus_Y179_1669	2	1630786..1633419	KLMA_20808	MGM1	0.544014	0.137864	-0.14209	0.493007	0.0136493	0.993154	-0.307136	0.369588	0.201174	0.418932	-0.583761	0.370131
Kmarxianus_Y179_1670	2	complement(1633689..1633901)	KLMA_20809	RPB10	-0.40394	0.178079	0.0684709	0.823579	0.238991	0.332714	0.755986	0.0266061	0.101575	0.611517	-0.723614	0.219545
Kmarxianus_Y179_1671	2	1634290..1636857	KLMA_20810	NAN1	0.508238	0.137213	-0.630174	0.00428976	0.278104	0.228309	0.511925	0.131958	0.237344	0.341127	0.459141	0.438189
Kmarxianus_Y179_1672	2	1637672..1638955	KLMA_20811	NPT1	-0.132532	0.802431	-0.143918	0.523847	0.0784512	0.758264	0.314346	0.42226	0.0320184	0.870231	-0.359868	0.599978
Kmarxianus_Y179_1673	2	1639506..1642577	KLMA_20812	KAP120	0.341922	0.344989	0.111133	0.67854	-0.136242	0.448353	-0.170324	0.616858	-0.392722	0.22047	-0.113024	0.918628
Kmarxianus_Y179_1674	2	complement(1642667..1645354)	KLMA_20813	PTP2	0.447986	0.188079	-0.380343	0.0761092	0.0786589	0.80742	0.017074	0.953163	-0.0517031	0.982166	-0.596772	0.389425
Kmarxianus_Y179_1675	2	1646270..1646791	_	_	1.4566	0.0560899	2.65729	0.00696342	0.597165	0.237178	1.68639	0.0098162	0.347141	0.34284	-0.000952773	0.88282
Kmarxianus_Y179_1676	2	1647996..1648877	KLMA_20814	SPC29	-0.0617621	0.897432	0.098147	0.710814	0.11174	0.760328	0.321984	0.472251	-0.177495	0.671369	0.0794532	0.838478
Kmarxianus_Y179_1677	2	complement(1648947..1650224)	KLMA_20815	RNY1	-0.462913	0.238221	-0.642174	0.00264782	-0.744707	0.000390756	-0.838653	0.0176754	-0.842838	0.0050513	-0.368654	0.608947
Kmarxianus_Y179_1678	2	complement(1650660..1651925)	KLMA_20816	RNY1	-0.504465	0.178341	0.0611308	0.887998	-0.62277	0.002772	-0.0221952	0.977621	-0.271051	0.467157	-0.0785767	0.958707
Kmarxianus_Y179_1679	2	complement(1653185..1654876)	KLMA_20817	ARG2	-0.173843	0.698239	-0.0497755	0.720601	-0.671161	0.00106941	-0.777981	0.0274576	-0.376705	0.242362	0.493252	0.379167
Kmarxianus_Y179_1680	2	1655194..1655799	KLMA_20818	PSF2	-0.12642	0.776648	-0.632496	0.0064938	-0.817973	0.00258383	-1.23764	0.000504243	-0.465148	0.17364	0.25849	0.629735
Kmarxianus_Y179_1681	2	1657055..1657537	KLMA_20819	_	-1.21266	0.00747977	-0.995569	0.027279	-1.8543	2.55847e-10	-1.06734	0.00204562	-1.08903	0.000440445	-0.0805862	0.619382
Kmarxianus_Y179_1682	2	1658728..1662312	KLMA_20820	_	0.603585	0.110897	-0.14894	0.424921	-0.0426314	0.766249	-0.0100403	0.969001	0.187667	0.445041	0.120563	0.846141
Kmarxianus_Y179_1683	2	1662814..1664361	KLMA_20821	APE3	-0.0939091	0.883533	-0.257005	0.288604	-0.24852	0.253135	-0.0698849	0.87042	-0.137493	0.7197	-0.096095	0.883351
Kmarxianus_Y179_1684	2	complement(1664600..1666498)	KLMA_20822	JEM1	0.10873	0.717037	0.0365187	0.876998	0.110999	0.70139	0.592688	0.0852809	0.696222	0.0131633	0.437648	0.436401
Kmarxianus_Y179_1685	2	1667970..1669262	KLMA_20823	YBR287W	0.0973698	0.704351	-0.0877357	0.648423	-0.365706	0.0920663	-0.248082	0.529946	-0.273583	0.515482	-2.25619	0.00908177
Kmarxianus_Y179_1686	2	complement(1670361..1670975)	KLMA_20824	SCP1	-0.480248	0.158117	-0.124452	0.544361	-0.0701694	0.74664	-0.400894	0.25421	-0.357611	0.251216	0.0669908	0.832389
Kmarxianus_Y179_1687	2	1671614..1673977	KLMA_20825	KHA1	-0.111675	0.836554	-0.0763519	0.693217	0.0338214	0.965781	-0.519107	0.159985	-0.442747	0.210166	-0.501927	0.433011
Kmarxianus_Y179_1688	2	complement(1674707..1676239)	KLMA_20826	FEN2	-0.393167	0.317962	-0.233019	0.389514	-0.109188	0.63655	-0.616749	0.0841745	-0.848134	0.00755743	-0.255455	0.708262
Kmarxianus_Y179_1689	2	1677254..1678927	KLMA_20827	amdS	0.15052	0.600062	0.0356417	0.995498	-0.258253	0.168044	0.578364	0.107622	0.328376	0.256315	0.98702	0.0886717
Kmarxianus_Y179_1690	2	1680126..1681961	KLMA_20828	MRS6	-0.0452848	0.986748	-0.332798	0.107884	-0.196885	0.298789	-0.450492	0.195776	-0.294053	0.388255	0.41864	0.411792
Kmarxianus_Y179_1691	2	complement(1682469..1683884)	KLMA_20829	PHO3	-1.45494	0.00236113	-0.435747	0.138873	-0.067931	0.730844	1.3358	0.0010963	0.861723	0.0127686	1.19705	0.0574515
Kmarxianus_Y179_1692	2	complement(1684955..1686697)	KLMA_20830	LAC12	-0.811492	0.0465603	0.308036	0.146898	-0.430174	0.0388045	-0.0936931	0.798751	-0.422507	0.165201	-1.89603	0.00211531
Kmarxianus_Y179_1693	2	complement(1688099..1689565)	KLMA_50635	BIO3	-0.103665	0.866882	-0.365555	0.0873631	-0.430472	0.028823	-0.401903	0.294181	-0.233605	0.498553	0.849567	0.138788
Kmarxianus_Y179_1694	2	1690088..1690774	KLMA_10006	BIO4	-0.278796	0.63478	-0.475608	0.237037	-0.636841	0.0330457	-0.316802	0.592512	-0.776809	0.076221	0.0539995	0.852213
Kmarxianus_Y179_1695	2	1691081..1692745	KLMA_10005	BIO5	0.156783	0.622704	0.216016	0.565627	-0.0730427	0.817183	-0.56358	0.263081	-0.747498	0.068509	-0.464015	0.457105
Kmarxianus_Y179_1696	2	complement(1693003..1693683)	KLMA_10004	Nqo2	_	_	_	_	_	_	_	_	_	_	_	_
Kmarxianus_Y179_1697	2	complement(1693003..1693683)	KLMA_10004	Nqo2	_	_	_	_	_	_	_	_	_	_	_	_
Kmarxianus_Y179_1698	2	complement(1695256..1696455)	KLMA_40001	TY2B-GR2	1.48231	0.000545655	-0.040483	0.710205	-0.655778	0.00910806	-1.30683	0.000874859	-0.800559	0.00665981	-1.51856	0.0148205
Kmarxianus_Y179_1699	3	<480..1184	KLMA_40001	TY2B-GR2	0.285324	0.377712	0.386716	0.727365	-1.21254	0.350008	-0.563956	0.768456	-0.425492	0.840214	-2.11348	0.163274
Kmarxianus_Y179_1700	3	<1439..>2053	KLMA_40001	TY2B-GR2	-0.580757	1	0.000340433	1	-1.0979	0.14227	-0.58223	0.473764	0.227233	1	0.977393	0.666681
Kmarxianus_Y179_1701	3	complement(4963..5544)	KLMA_60001	YCR007C	-0.542749	0.109933	-0.474422	0.0372184	-0.663535	0.00227718	-0.0101242	0.975894	-0.682698	0.0315359	-0.869463	0.138957
Kmarxianus_Y179_1702	3	<7934..8167	_	YGL262W	-0.293366	0.532501	-0.224676	0.549971	-0.200547	0.527397	-0.484184	0.251829	-0.833923	0.0205463	-0.152631	0.875459
Kmarxianus_Y179_1703	3	12943..14517	KLMA_60002	PYD2	0.0683912	0.998892	0.39334	0.285942	-0.312065	0.296785	-0.269352	0.560196	-0.0962466	0.918031	0.686345	0.246935
Kmarxianus_Y179_1704	3	complement(15586..17112)	KLMA_60003	yxeK	-0.621721	0.510475	0.626292	0.291309	-0.260322	0.462922	-0.213073	0.741223	-0.130851	0.828989	0.324677	0.551876
Kmarxianus_Y179_1705	3	complement(17736..19484)	KLMA_60004	_	-0.154034	0.832291	0.222029	0.649232	-0.534136	0.0901488	-0.707399	0.110895	-0.569265	0.122321	0.455033	0.374049
Kmarxianus_Y179_1706	3	21765..22376	KLMA_60005	_	0.157135	1	-0.0311357	1	0.0208742	1	-0.464096	0.690253	-0.0574311	0.949795	1.69003	0.197915
Kmarxianus_Y179_1707	3	23412..25103	KLMA_60006	_	-0.136795	0.890646	-0.0249622	0.916915	-0.274714	0.368941	-0.705583	0.122097	-0.37667	0.379431	0.0364015	0.759379
Kmarxianus_Y179_1708	3	complement(26009..31960)	KLMA_60007	FLO1	0.319564	0.683187	-0.958746	4.08872e-05	0.121654	0.678362	-0.266853	0.52051	-0.164024	0.654025	-1.28452	0.0484321
Kmarxianus_Y179_1709	3	complement(33500..36532)	KLMA_30009	LAC4	0.185544	0.542436	-0.593686	0.00682694	-0.0110676	0.886277	-0.881715	0.0310219	-0.809708	0.0264579	-1.9797	0.0147532
Kmarxianus_Y179_1710	3	39712..41475	KLMA_30010	LAC12	0.354151	0.309667	-0.15139	0.520515	-0.326082	0.11651	-0.208295	0.518339	-0.0246489	0.967588	-0.87628	0.105547
Kmarxianus_Y179_1711	3	complement(42156..44693)	KLMA_30011	_	0.00257565	0.919138	-0.626674	0.0200299	-0.360637	0.0792873	-1.42204	0.000243465	-1.24022	8.2832e-05	-0.732083	0.24429
Kmarxianus_Y179_1712	3	complement(45901..47640)	KLMA_30012	mirA	1.01328	0.00760895	0.986941	3.09275e-05	-1.08503	6.69006e-06	-0.839358	0.0154916	-0.481203	0.12441	0.0165162	0.998517
Kmarxianus_Y179_1713	3	complement(50175..51866)	KLMA_30013	CYB2	-0.327794	0.559763	-0.377418	0.333577	-0.228661	0.344423	0.875932	0.040625	0.982044	0.00311572	1.12763	0.0544869
Kmarxianus_Y179_1714	3	52920..54557	KLMA_30014	_	-0.0212974	0.916465	-0.117104	0.693347	-0.149355	0.523755	-0.527516	0.194085	-0.514851	0.131226	-0.90815	0.120522
Kmarxianus_Y179_1715	3	55581..56999	KLMA_30015	bioA	-0.173367	0.653304	-0.0872009	0.636717	-0.146842	0.538563	-1.87122	1.01986e-07	-0.47047	0.167566	0.147366	0.762893
Kmarxianus_Y179_1716	3	57759..58688	KLMA_30016	YPR1	-0.332665	0.476651	-0.269527	0.313428	0.14993	0.592852	1.05091	0.0158042	0.954296	0.00436346	1.3805	0.0476102
Kmarxianus_Y179_1717	3	59558..61267	KLMA_30017	PUT4	0.102009	0.724093	0.279869	0.419588	0.360198	0.104081	0.496958	0.157311	0.987602	0.000911444	1.50193	0.0182445
Kmarxianus_Y179_1718	3	complement(61375..62400)	KLMA_30018	ARI1	-0.407557	0.254514	0.490337	0.128594	0.165962	0.558436	-0.0830757	0.873287	0.433656	0.186337	0.933077	0.1116
Kmarxianus_Y179_1719	3	62878..64491	KLMA_30019	fmo1	0.0860826	0.793735	0.556106	0.0480694	-0.296005	0.157768	0.00302	1	0.223179	0.396046	0.970797	0.0923068
Kmarxianus_Y179_1720	3	66274..67479	KLMA_30020	LAA1	-0.777485	0.341833	-0.261546	0.771181	-1.28524	0.00412692	-1.01149	0.113471	-0.334211	0.630815	-0.417547	0.741128
Kmarxianus_Y179_1721	3	complement(67530..68294)	KLMA_30021	MATA2	-1.33269	0.0001799	-1.1027	0.0234184	-2.25914	7.83619e-05	-2.14887	0.00126655	-1.98995	0.00029835	-1.43333	0.128873
Kmarxianus_Y179_1722	3	69160..69801	KLMA_30022	MATA1	_	_	_	_	_	_	_	_	_	_	_	_
Kmarxianus_Y179_1723	3	complement(69824..70144)	KLMA_10013	SLA2	0.0643271	1	-0.607133	0.985943	0.379693	0.684547	1.08212	0.33356	-2.31713	2.60803e-05	-4.5445	8.73198e-10
Kmarxianus_Y179_1724	3	complement(70800..71987)	KLMA_30024	YHB1	-0.649879	0.179692	0.909819	0.00181664	-0.671655	0.00373614	-0.77854	0.0704552	-0.673184	0.0704233	-0.73107	0.276051
Kmarxianus_Y179_1725	3	73715..74638	KLMA_30025	MIR1	0.247699	0.52263	0.938222	0.00102483	-0.419548	0.0547956	-0.822106	0.0882878	-0.371759	0.378443	-1.10736	0.157252
Kmarxianus_Y179_1726	3	complement(75538..>76074)	KLMA_30026	YRA2	-0.454308	0.259143	-0.205627	0.3256	-0.140007	0.484106	0.0308422	0.91346	0.270515	0.27121	1.21743	0.0307216
Kmarxianus_Y179_1727	3	complement(76738..78915)	KLMA_30027	DOA1	0.0411279	0.873422	-0.250532	0.246244	-0.0230446	0.873778	0.221187	0.47925	0.316637	0.209985	1.32768	0.0185228
Kmarxianus_Y179_1728	3	79267..81138	KLMA_30028	SAC1	-0.0404565	0.999494	-0.0991903	0.65833	0.0870397	0.728193	-0.0250483	0.988827	0.0891947	0.677081	1.08206	0.059907
Kmarxianus_Y179_1729	3	complement(81315..82793)	KLMA_30029	TRP3	0.136235	0.695568	0.679571	0.00973869	0.0798221	0.780353	0.639794	0.0768169	1.06196	0.000270718	1.41072	0.0263674
Kmarxianus_Y179_1730	3	83552..84820	KLMA_30030	CDC11	-0.0443116	0.946445	0.108559	0.705342	-0.0101194	0.935879	-0.165352	0.657614	-0.23942	0.539261	0.640594	0.257366
Kmarxianus_Y179_1731	3	complement(85612..86823)	KLMA_30031	HOC1	0.0195589	0.92137	0.459648	0.0698498	0.128818	0.573368	0.795736	0.0211135	0.682806	0.0157615	0.864102	0.154073
Kmarxianus_Y179_1732	3	complement(87255..87848)	KLMA_30032	MOG1	-0.572417	0.113949	0.127359	0.580112	0.00312207	0.976213	-0.790103	0.0262337	-0.593251	0.0517616	-1.79568	0.00243796
Kmarxianus_Y179_1733	3	88268..91330	KLMA_30033	UBA1	0.455237	0.313588	0.121994	0.73919	0.0661246	0.818308	0.0902193	0.820714	0.118394	0.689636	0.591808	0.451943
Kmarxianus_Y179_1734	3	complement(91562..95452)	KLMA_30034	STE6	0.209761	0.532057	0.200033	0.524551	-0.265547	0.167987	0.280232	0.385774	0.276329	0.326267	1.07671	0.0524175
Kmarxianus_Y179_1735	3	96264..96917	KLMA_30035	OPI3	-0.583315	0.127368	-0.103884	0.621857	0.616757	0.00898174	-0.0291631	0.956538	0.0630349	0.852547	-0.571566	0.390998
Kmarxianus_Y179_1736	3	97523..98245	KLMA_30036	_	-0.357545	0.33057	-0.0352573	0.895756	0.0031955	0.983441	-0.288782	0.379826	-0.779881	0.0126033	-1.34997	0.0218953
Kmarxianus_Y179_1737	3	98433..100259	KLMA_30037	mug157	0.0422022	0.844936	-0.303021	0.14782	-0.303155	0.145905	0.108993	0.715139	-0.225158	0.540243	0.383339	0.460157
Kmarxianus_Y179_1738	3	100590..101402	KLMA_30038	AIM27	-0.475267	0.170738	0.0315924	0.917064	0.0526579	0.93629	-0.131452	0.792399	0.133198	0.601777	0.653646	0.285098
Kmarxianus_Y179_1739	3	101758..102939	KLMA_30039	NPA3	-0.00216791	0.944723	0.202264	0.40482	0.124044	0.644827	-0.169899	0.690881	-0.163245	0.657612	-0.920755	0.125891
Kmarxianus_Y179_1740	3	complement(103021..103845)	KLMA_30040	ADD66	-0.680726	0.0441877	0.0684642	0.775598	-0.107242	0.529055	0.284094	0.395021	0.0837752	0.690477	0.291699	0.546985
Kmarxianus_Y179_1741	3	104836..105804	KLMA_30041	LIA1	-0.783924	0.0747013	-0.58729	0.0239914	0.906875	3.00849e-05	0.905713	0.00755461	0.346934	0.194912	-0.728446	0.164198
Kmarxianus_Y179_1742	3	106055..106639	KLMA_30042	HAM1	0.0910044	0.679632	-0.145099	0.455778	0.114222	0.711463	0.544638	0.136532	0.454373	0.125001	0.909187	0.118533
Kmarxianus_Y179_1743	3	107042..110329	KLMA_30043	LOS1	0.893198	0.0271996	-0.187571	0.349883	0.366747	0.0951466	0.675158	0.0547395	0.971434	0.000838827	1.57522	0.0176557
Kmarxianus_Y179_1744	3	110864..112807	_	EAP1	0.719662	0.0969432	0.0900145	0.773855	-0.416782	0.0460728	-0.51676	0.190495	-0.390328	0.253637	-0.678282	0.296935
Kmarxianus_Y179_1745	3	complement(112921..113976)	KLMA_30044	RFC2	-0.2871	0.471818	0.244427	0.304529	-0.0388957	0.770557	0.141226	0.669125	0.322673	0.227954	1.52209	0.00808464
Kmarxianus_Y179_1746	3	114215..114631	KLMA_30045	YAE1	-0.362323	0.267097	-0.0415956	0.886567	-0.110316	0.702682	0.787526	0.0748177	0.369721	0.258526	1.03529	0.0954687
Kmarxianus_Y179_1747	3	complement(114753..122126)	KLMA_30046	TOR2	0.461773	0.253326	0.0113334	0.99643	0.140707	0.566806	0.0241077	0.87949	0.206139	0.438976	0.387616	0.549335
Kmarxianus_Y179_1748	3	complement(122662..124224)	KLMA_30047	THI20	-0.625522	0.124936	-1.42433	6.24515e-10	-0.845366	0.000135058	-0.258018	0.558693	-0.619457	0.0836836	-0.410732	0.485715
Kmarxianus_Y179_1749	3	124814..126181	KLMA_30048	ARP3	-0.317066	0.464878	0.143447	0.623975	-0.193262	0.363021	-0.0153156	0.996106	-0.215102	0.587827	0.245126	0.693385
Kmarxianus_Y179_1750	3	complement(126699..128351)	KLMA_30049	CCT5	0.530324	0.20046	0.181739	0.512456	0.209734	0.383053	0.888073	0.0127109	0.840076	0.00529523	1.43143	0.0290592
Kmarxianus_Y179_1751	3	complement(128711..129097)	KLMA_40114	RPC11	0.823325	0.0220825	-0.0516588	0.860898	0.578396	0.114631	0.486355	0.223833	0.234205	0.477798	-1.20394	0.0335572
Kmarxianus_Y179_1752	3	130520..133480	KLMA_30050	YJR061W	1.24782	0.00132762	-0.338466	0.106692	-0.107739	0.542263	-0.13766	0.679594	0.0488673	0.795169	-0.615768	0.363492
Kmarxianus_Y179_1753	3	134058..135284	KLMA_30051	NTA1	-0.294839	0.457874	-0.160748	0.389046	-0.321165	0.141616	-0.398792	0.308972	-0.113533	0.783399	0.235102	0.632721
Kmarxianus_Y179_1754	3	complement(135445..138249)	KLMA_30052	MNN4	0.712655	0.0532053	0.479203	0.0329261	0.0605152	0.863976	-0.311497	0.372539	-0.0465332	0.939321	-0.121213	0.859448
Kmarxianus_Y179_1755	3	complement(138935..140050)	_	CBF1	0.136896	0.648056	0.512146	0.0527339	-0.222422	0.221564	-0.561369	0.134404	-0.12575	0.741717	-1.36772	0.0266838
Kmarxianus_Y179_1756	3	140672..142990	KLMA_30053	CTF18	0.106398	0.687559	0.00542156	0.945635	-0.339474	0.0905841	-0.0949382	0.829933	-0.756835	0.0192929	-0.822906	0.230393
Kmarxianus_Y179_1757	3	143603..144772	KLMA_30055	YAP3	-0.21276	0.678242	0.0903592	0.765025	-0.265518	0.233309	-0.556007	0.152487	-0.372533	0.27857	-1.53645	0.0295958
Kmarxianus_Y179_1758	3	145123..146385	KLMA_30056	CUE2	-0.0539053	0.874093	0.0628	0.892567	0.0643338	0.886051	0.306155	0.467923	0.528239	0.151016	0.0552802	0.848791
Kmarxianus_Y179_1759	3	146627..148282	KLMA_30057	MIF2	0.514406	0.312965	-0.169186	0.454379	0.400914	0.180564	0.607981	0.129964	0.812605	0.00985651	0.935968	0.0823547
Kmarxianus_Y179_1760	3	complement(148487..151882)	KLMA_30058	STE20	0.737733	0.0927802	0.0248906	1	0.186638	0.433829	0.0726064	0.793414	0.468963	0.12403	0.626173	0.360413
Kmarxianus_Y179_1761	3	complement(152710..157143)	KLMA_30059	UFD4	0.600992	0.16044	0.0317795	0.954435	-0.0333379	0.83719	-0.494576	0.236134	-0.158563	0.709489	-0.728819	0.334177
Kmarxianus_Y179_1762	3	157711..158421	KLMA_30060	MRT4	0.0278725	0.855304	0.0587549	0.895411	1.03391	0.000651396	1.73372	6.21879e-06	-0.104469	0.819049	-1.34286	0.0152777
Kmarxianus_Y179_1763	3	complement(158500..159015)	KLMA_30061	SHU1	-0.452579	0.341592	-0.222796	0.615545	0.163531	0.811217	0.561088	0.358692	0.457643	0.380134	0.0413597	0.894168
Kmarxianus_Y179_1764	3	159409..160626	KLMA_30062	MRP4	-0.0694919	0.893429	0.216254	0.408449	0.21464	0.333361	-0.614694	0.128355	-0.253528	0.499189	-0.0150956	0.975412
Kmarxianus_Y179_1765	3	complement(161231..162460)	KLMA_30063	LAG1	-0.213129	0.693541	-0.416186	0.0522093	0.116217	0.67263	0.319777	0.375811	0.23273	0.364676	0.188202	0.700279
Kmarxianus_Y179_1766	3	164075..165640	KLMA_30064	HSE1	0.371085	0.319517	0.182729	0.496374	-0.0986953	0.611215	-0.135554	0.770907	-0.249197	0.486134	-0.563506	0.397556
Kmarxianus_Y179_1767	3	166028..166828	KLMA_30065	CAP1	-0.376982	0.353022	-0.113966	0.584643	-0.191872	0.308922	-0.435642	0.209424	-0.600716	0.049107	0.345136	0.488455
Kmarxianus_Y179_1768	3	complement(166909..>167166)	_	SFT1	-0.706522	0.0375483	0.0429542	0.841897	0.056808	0.911999	-0.345269	0.343827	-0.647208	0.0415729	-1.55162	0.0164169
Kmarxianus_Y179_1769	3	167968..168438	_	_	-0.155757	0.971695	1.80829	0.00185413	-0.123067	0.739864	0.379127	0.594931	0.550761	0.230048	0.29544	0.740484
Kmarxianus_Y179_1770	3	168702..>169449	KLMA_30066	RPL14B	-0.720747	0.125222	0.287726	0.333584	0.500333	0.0431021	0.525854	0.217152	-0.252342	0.514962	-1.13211	0.102477
Kmarxianus_Y179_1771	3	170478..171728	KLMA_30067	AUR1	0.152177	0.555881	-0.272006	0.185196	0.643169	0.00262699	1.20229	0.000366972	0.827519	0.00400551	0.445748	0.490412
Kmarxianus_Y179_1772	3	complement(172253..172642)	KLMA_30068	MRP17	0.0358437	0.922919	0.472437	0.0286846	0.121859	0.67647	-0.734141	0.0339059	-0.400161	0.205722	-0.99239	0.0883856
Kmarxianus_Y179_1773	3	<173381..>173938	KLMA_30069	DID4	-0.195286	0.653287	-0.0795315	0.726391	-0.217996	0.316392	-0.496949	0.172141	-0.359859	0.28213	-0.851716	0.179132
Kmarxianus_Y179_1774	3	complement(<174141..174734)	KLMA_30070	MET14	-0.428118	0.279394	-0.305893	0.128848	-0.0316045	0.802899	0.197766	0.587342	0.352996	0.165411	0.465839	0.412351
Kmarxianus_Y179_1775	3	complement(176989..179043)	KLMA_30071	VPS1	0.0995223	0.731636	0.130349	0.688036	0.00856744	0.98545	0.0145402	0.950125	0.0262181	0.859759	0.97173	0.150076
Kmarxianus_Y179_1776	3	180589..182445	KLMA_30072	PAP1	0.634338	0.131993	-0.177172	0.434531	-0.0139886	0.938058	-0.203135	0.555057	0.261593	0.298826	0.92493	0.106036
Kmarxianus_Y179_1777	3	183749..185488	KLMA_30073	MUP1	-0.115659	0.873985	-1.17953	3.69398e-05	-0.118179	0.510697	0.576644	0.131627	0.349084	0.223962	0.218274	0.743918
Kmarxianus_Y179_1778	3	185883..188621	KLMA_30074	RSC2	0.6892	0.113115	0.1353	0.618348	0.0686043	0.797293	0.46479	0.164133	0.768657	0.00720256	1.08376	0.0860991
Kmarxianus_Y179_1779	3	189136..190584	KLMA_30075	ADE13	-0.136749	0.810769	-0.056743	0.788151	0.403052	0.0657222	-0.000633262	0.96562	0.0685492	0.693783	0.996721	0.0851895
Kmarxianus_Y179_1780	3	complement(190779..191534)	KLMA_30076	LST7	-0.443366	0.201014	0.176815	0.444781	-0.316447	0.196877	0.0246806	0.916091	-0.238921	0.578539	-0.0368318	0.997971
Kmarxianus_Y179_1781	3	join(192178..192201,192355..193635)	KLMA_30077	VPS38	-0.0724432	0.920853	0.3174	0.163118	-0.259462	0.213846	-0.227088	0.537918	-0.166659	0.673284	0.408913	0.476999
Kmarxianus_Y179_1782	3	complement(193607..195352)	KLMA_30078	DCR2	0.141377	0.658019	0.270776	0.204874	-0.301325	0.122844	-0.0915423	0.802584	0.0655025	0.72189	-0.0316854	0.975113
Kmarxianus_Y179_1783	3	complement(195656..195931)	KLMA_30079	_	-0.689182	0.0224057	0.181638	0.42604	-0.293731	0.130054	-0.248045	0.503543	-0.530349	0.125183	-1.77313	0.00615726
Kmarxianus_Y179_1784	3	196238..198445	KLMA_30080	STE11	0.465073	0.209056	0.0181366	0.992073	0.0137579	0.990366	0.0399939	0.886512	-0.0127185	0.963483	0.0081017	0.96473
Kmarxianus_Y179_1785	3	198668..201742	KLMA_30081	PEP5	0.194676	0.54528	-0.0320666	0.822517	0.0212122	0.997179	-0.125766	0.836388	0.804355	0.0196137	1.38228	0.0142888
Kmarxianus_Y179_1786	3	202064..204136	KLMA_30082	FUS2	0.888812	0.0430961	0.386692	0.483354	-0.137827	0.588874	0.944802	0.0561252	1.12396	0.00427048	2.098	0.000564755
Kmarxianus_Y179_1787	3	204360..204980	KLMA_30083	RRS1	-0.140917	0.735745	-0.350319	0.0750621	0.560415	0.0591974	1.10535	0.00594708	0.155912	0.566752	0.31454	0.629313
Kmarxianus_Y179_1788	3	join(205329..205337,205474..206157)	KLMA_30085	YOR296W	-0.134869	0.743495	-0.208937	0.424009	0.186422	0.601223	0.470266	0.263748	0.199311	0.559102	0.753757	0.191556
Kmarxianus_Y179_1789	3	206459..210565	KLMA_30085	YOR296W	0.514034	0.183424	-0.157726	0.415236	0.0763671	0.736039	-0.266376	0.494454	0.0431129	0.76997	-0.0877759	0.913421
Kmarxianus_Y179_1790	3	210995..211861	KLMA_30086	mug14	0.0986541	0.885529	0.499472	0.0328219	-0.401885	0.0534483	-0.384068	0.373276	-0.705875	0.0583637	-1.54591	0.0256508
Kmarxianus_Y179_1791	3	212101..213201	KLMA_30087	RNH1	0.133288	0.613268	0.672916	0.00752181	0.239494	0.472284	-0.301617	0.541689	-0.239349	0.547209	-0.749951	0.240438
Kmarxianus_Y179_1792	3	214171..216276	KLMA_30088	FAA1	0.438643	0.270359	-0.131101	0.562502	0.159238	0.543946	-0.189583	0.742709	0.0322397	0.876506	-0.253722	0.797529
Kmarxianus_Y179_1793	3	complement(217290..218591)	KLMA_30089	CLD1	-0.0500803	0.996773	0.116601	0.638198	-0.334224	0.092359	-0.365176	0.3461	0.13426	0.64027	0.166841	0.789127
Kmarxianus_Y179_1794	3	complement(219003..220925)	KLMA_30090	MUB1	0.664798	0.105661	0.117925	0.648048	-0.125073	0.555001	-0.884474	0.0159499	-0.163562	0.627938	-0.78635	0.20051
Kmarxianus_Y179_1795	3	221271..221888	KLMA_30091	VPH2	-0.274683	0.528667	0.140491	0.573255	-0.460008	0.0287607	-0.479134	0.183726	-0.368867	0.243552	-0.033568	0.99686
Kmarxianus_Y179_1796	3	complement(222195..223352)	KLMA_30092	SRT1	0.387292	0.313916	0.0311617	0.992078	-0.251688	0.264352	0.450863	0.294344	0.797068	0.0311311	1.05464	0.058042
Kmarxianus_Y179_1797	3	complement(223827..224786)	KLMA_30093	OAC1	0.0488646	0.84856	0.104069	0.68953	0.0141575	1	-0.647258	0.0666301	0.0166864	0.860915	0.882886	0.108394
Kmarxianus_Y179_1798	3	complement(225656..228247)	KLMA_30094	YMR102C	0.546915	0.203735	-0.119334	0.531527	-0.00637048	0.918621	-0.408171	0.321951	-0.218812	0.555147	-0.608233	0.384733
Kmarxianus_Y179_1799	3	228648..229109	KLMA_30095	_	-0.315917	0.434877	0.093559	0.754933	0.0802446	0.737391	0.427403	0.201069	-0.933998	0.001334	-1.86838	0.00385927
Kmarxianus_Y179_1800	3	complement(229197..230906)	KLMA_30096	SSH4	-0.118681	0.779303	-0.251209	0.208388	0.0786375	0.670477	0.36591	0.373841	0.881247	0.0113767	0.290445	0.685753
Kmarxianus_Y179_1801	3	complement(<231491..233329)	KLMA_30097	RRN3	0.96276	0.00430038	-0.450131	0.0230078	0.470433	0.0416158	1.01986	0.00328066	0.662608	0.0145863	0.546405	0.359344
Kmarxianus_Y179_1802	3	complement(233963..236263)	KLMA_30098	YPK1	0.205893	0.569705	0.265049	0.354165	-0.3024	0.151264	-0.584855	0.176081	-0.383714	0.312098	-0.803228	0.271322
Kmarxianus_Y179_1803	3	complement(236708..238408)	KLMA_30099	PGM2	-0.331114	0.472747	-0.409626	0.122079	-0.172541	0.426198	-0.351904	0.441207	-0.606115	0.101978	-0.398119	0.582132
Kmarxianus_Y179_1804	3	complement(238800..240713)	KLMA_30100	YKU80	0.322613	0.32964	-0.208765	0.217376	-0.0412535	0.861796	-0.913513	0.00874751	-0.900477	0.0031085	-1.51712	0.0170975
Kmarxianus_Y179_1805	3	241098..241403	KLMA_30101	SPG4	-0.926403	0.0159188	0.808402	0.0401005	-0.513071	0.135352	-2.18521	5.19584e-08	-1.77502	4.21565e-06	-3.65292	0.000108349
Kmarxianus_Y179_1806	3	241601..242629	KLMA_30102	PMU1	-0.495715	0.251475	-0.156713	0.458363	0.0582321	0.77003	-0.327664	0.380664	-0.570282	0.0687732	-1.58743	0.0136318
Kmarxianus_Y179_1807	3	243220..245334	KLMA_20006	DUR3	0.613044	0.16266	-0.622911	0.0129646	0.0948729	0.744255	0.103981	0.737149	0.14947	0.553529	-0.631826	0.27149
Kmarxianus_Y179_1808	3	246314..248416	KLMA_30105	ILV2	0.508723	0.183556	0.724567	0.0055902	-0.061331	0.729789	0.123108	0.771597	0.806582	0.0307403	1.48622	0.110622
Kmarxianus_Y179_1809	3	248893..252684	KLMA_30106	MYO1	0.684525	0.120136	-0.0696789	0.705534	-0.0513754	0.78332	-0.284361	0.471974	-0.179328	0.623085	-0.102699	0.93554
Kmarxianus_Y179_1810	3	complement(252949..254514)	KLMA_30107	HFD1	-0.0448281	0.985994	0.191745	0.436149	-0.233551	0.22752	-0.59813	0.0908906	-0.329786	0.300738	-0.0888843	0.908762
Kmarxianus_Y179_1811	3	254805..255554	KLMA_30108	SHE2	-0.179114	0.65907	0.168318	0.499721	0.0324053	0.959247	0.193943	0.658674	0.0475125	0.762649	0.847272	0.145738
Kmarxianus_Y179_1812	3	complement(255587..256837)	KLMA_30109	YMR111C	-0.210116	0.626472	0.16476	0.543273	-0.115385	0.549287	-0.477016	0.191443	-0.212099	0.5638	-0.352631	0.534499
Kmarxianus_Y179_1813	3	complement(257070..257423)	KLMA_30110	MED11	-0.712534	0.0289444	0.346357	0.113619	-0.0164798	0.919	-0.138534	0.748264	-0.0857268	0.878791	-0.0581561	0.958391
Kmarxianus_Y179_1814	3	257622..258932	KLMA_30111	FOL3	-0.323874	0.396221	0.216033	0.358281	-0.14808	0.474616	0.348281	0.344497	0.747634	0.021806	1.24342	0.0307801
Kmarxianus_Y179_1815	3	complement(258955..259854)	KLMA_30112	YMR114C	-0.232608	0.530942	0.29268	0.220996	-0.477041	0.0270334	-1.06273	0.00922072	-0.768739	0.0237164	-0.961903	0.137573
Kmarxianus_Y179_1816	3	260164..261672	KLMA_30113	MGR3	0.353104	0.311131	0.245781	0.280006	-0.0607932	0.756432	-0.73002	0.0638582	-0.141903	0.699599	-0.401182	0.562229
Kmarxianus_Y179_1817	3	262038..264386	KLMA_30114	OCT1	0.525402	0.145355	0.214225	0.369669	-0.0563255	0.779091	-0.53586	0.142544	0.349779	0.165705	0.268315	0.599256
Kmarxianus_Y179_1818	3	complement(join(264673..265101,265487..266038))	KLMA_30115	ASC1	0.0640764	0.821706	0.594231	0.0317529	0.811893	0.000851767	0.574238	0.180045	-0.134349	0.786935	-0.567579	0.395688
Kmarxianus_Y179_1819	3	266824..268947	KLMA_30117	APL2	0.0600664	0.809706	0.292367	0.28042	-0.0177525	0.84771	0.0531839	0.841372	0.122604	0.585599	1.00807	0.0851107
Kmarxianus_Y179_1820	3	complement(269065..269394)	KLMA_30119	CMC1	-0.827604	0.016323	-0.287963	0.194183	0.205357	0.523601	-0.91109	0.0207503	-0.16567	0.724312	-1.03211	0.089452
Kmarxianus_Y179_1821	3	269745..270134	KLMA_30120	MRPL31	-0.466928	0.148758	0.211162	0.380624	0.0402312	0.946199	-0.749611	0.0401628	-0.366296	0.259509	-1.18647	0.0409855
Kmarxianus_Y179_1822	3	complement(270243..270782)	KLMA_30121	SPC24	-0.311582	0.372769	0.0182709	0.993601	-0.0334379	0.918191	-0.0330291	0.946607	0.33144	0.298659	0.653117	0.260253
Kmarxianus_Y179_1823	3	270990..271184	KLMA_30122	_	-0.734504	0.0271391	0.192275	0.526365	0.272747	0.393715	0.655985	0.101174	0.189521	0.519367	-1.16444	0.0970167
Kmarxianus_Y179_1824	3	complement(271257..272621)	KLMA_30123	CTK1	-0.152526	0.692632	0.276326	0.215463	0.109318	0.642283	0.226188	0.466711	0.510585	0.067723	0.282381	0.621914
Kmarxianus_Y179_1825	3	complement(272995..273540)	KLMA_30124	SHH3	-0.766277	0.0414433	0.501144	0.0498529	-0.418258	0.0429143	-1.05526	0.0340006	-0.536875	0.181784	-1.40944	0.0589422
Kmarxianus_Y179_1826	3	complement(273929..276532)	KLMA_30125	VTC2	0.265267	0.497334	0.341596	0.245939	0.0515654	0.866318	-0.298501	0.488269	0.106215	0.679887	0.193979	0.761202
Kmarxianus_Y179_1827	3	complement(277328..277972)	KLMA_30127	SEC4	-0.162674	0.761661	-0.163217	0.481205	-0.0780216	0.714056	-0.320929	0.503145	-0.0963781	0.860025	-0.491784	0.50769
Kmarxianus_Y179_1828	3	complement(278398..284850)	KLMA_30128	BLM10	0.247719	0.513942	0.350341	0.153645	0.211373	0.378253	0.471392	0.161401	0.594421	0.0298239	1.43129	0.0228456
Kmarxianus_Y179_1829	3	complement(285266..286885)	KLMA_30129	_	-0.277639	0.526437	-0.308944	0.160782	-0.466852	0.0521373	-0.948174	0.00675511	-0.360468	0.24422	-1.02106	0.0938898
Kmarxianus_Y179_1830	3	287439..289898	KLMA_30130	CFT2	0.344683	0.323997	-0.0774521	0.615224	0.0832398	0.764203	0.727575	0.0354178	0.663814	0.0144164	0.513109	0.383834
Kmarxianus_Y179_1831	3	291004..292212	KLMA_30133	RRG1	-0.0731405	0.95713	-0.170842	0.492989	-0.140407	0.503131	0.420323	0.285207	0.49542	0.104542	-0.206086	0.733171
Kmarxianus_Y179_1832	3	complement(292274..292906)	KLMA_30134	RTR1	-0.483805	0.197932	0.0738464	0.835859	-0.156817	0.481727	-0.470096	0.243327	-0.296845	0.383853	-0.750619	0.234786
Kmarxianus_Y179_1833	3	293178..294803	KLMA_30135	EMP65	-0.0820158	0.876906	0.209952	0.339956	-0.0759366	0.668986	0.214039	0.525954	-0.0466692	0.931771	-0.128167	0.858577
Kmarxianus_Y179_1834	3	295164..296687	KLMA_30136	gabD	-0.594912	0.130348	-0.200288	0.297646	-0.339859	0.0976344	-1.90528	1.18656e-06	-1.39672	1.52042e-05	-0.198538	0.875143
Kmarxianus_Y179_1835	3	complement(296767..297846)	KLMA_30137	mlo2	-0.454787	0.208084	0.0451363	0.942414	-0.109969	0.631673	-0.302079	0.402881	-0.272505	0.418133	-0.685379	0.250417
Kmarxianus_Y179_1836	3	298558..301218	KLMA_30138	MCM2	0.415923	0.286124	-0.222256	0.259914	0.236292	0.267933	0.624939	0.0596523	0.618492	0.0241327	0.869874	0.120405
Kmarxianus_Y179_1837	3	complement(301452..303569)	KLMA_30139	NCL1	0.352845	0.308393	-0.390392	0.0727228	0.439227	0.0445611	0.382942	0.253964	0.529416	0.0501306	0.772373	0.222352
Kmarxianus_Y179_1838	3	complement(303855..304232)	KLMA_30140	RRN10	0.195399	0.554063	-0.184289	0.602418	0.428856	0.224567	0.208502	0.694321	0.626091	0.196888	0.611995	0.339764
Kmarxianus_Y179_1839	3	complement(305122..305721)	KLMA_30141	EMP24	-1.03568	0.00479793	0.0464801	0.922563	-0.00921492	0.858586	0.53252	0.125122	-0.952712	0.00138429	-2.18007	0.000240812
Kmarxianus_Y179_1840	3	complement(306965..307900)	KLMA_30142	GLC7	0.125527	0.700876	-0.105488	0.671681	-0.0344811	0.876926	-0.441052	0.336997	-0.528724	0.168049	-0.605659	0.436805
Kmarxianus_Y179_1841	3	309637..310305	KLMA_30143	YIP4	0.178787	0.568322	0.105455	0.687458	-0.233797	0.235537	0.213336	0.488063	0.155092	0.502503	0.5423	0.324871
Kmarxianus_Y179_1842	3	310713..315185	KLMA_30144	MDS3	0.589745	0.192527	0.10269	0.673957	-0.0391099	0.785108	-0.234875	0.52627	0.136831	0.601884	0.792556	0.183661
Kmarxianus_Y179_1843	3	315941..323947	KLMA_30145	GCN1	0.543972	0.196224	0.40867	0.107629	0.420266	0.0831349	0.131335	0.696542	0.328529	0.289313	0.868886	0.259132
Kmarxianus_Y179_1844	3	complement(324081..324311)	_	_	-0.927525	0.033984	-0.310066	0.488829	-0.0281584	0.926105	0.461239	0.479999	0.982578	0.0940028	0.330624	0.638233
Kmarxianus_Y179_1845	3	complement(324544..325341)	KLMA_30146	SGF29	-0.178866	0.65533	0.379684	0.134314	0.636636	0.0558263	0.826298	0.0592337	0.734705	0.04156	1.03965	0.0793822
Kmarxianus_Y179_1846	3	325978..327069	KLMA_30147	MRPL2	0.112722	0.714818	0.252579	0.345865	0.200648	0.365927	-0.712425	0.0752308	0.0138585	0.859829	-0.259203	0.642698
Kmarxianus_Y179_1847	3	complement(327266..328153)	KLMA_30148	ILV6	0.000100204	0.922249	0.278117	0.330056	-0.424003	0.0774438	-0.50019	0.287793	0.172102	0.562435	0.343593	0.649128
Kmarxianus_Y179_1848	3	complement(329017..330264)	KLMA_30149	IDP2	-0.375566	0.456558	-0.119767	0.601811	0.174097	0.502612	-0.349842	0.511854	-0.00970784	0.94742	-0.00834091	0.983146
Kmarxianus_Y179_1849	3	complement(331087..331764)	KLMA_30150	YNL010W	-1.06267	0.0144499	-1.31762	2.83369e-07	0.536962	0.0106296	-0.211259	0.532282	-0.191778	0.574642	-0.573323	0.338471
Kmarxianus_Y179_1850	3	332177..333556	_	YNL011C	0.343364	0.286263	0.157488	0.564961	-0.067867	0.757325	0.234126	0.443235	0.429302	0.124692	0.546662	0.311039
Kmarxianus_Y179_1851	3	complement(333694..334368)	KLMA_30151	SSP120	0.0146114	0.928923	-0.27165	0.200509	0.179301	0.417856	0.347726	0.316303	0.106164	0.617657	-0.196584	0.761886
Kmarxianus_Y179_1852	3	complement(334729..>336588)	KLMA_30152	SPO1	0.481806	0.406416	-0.273978	0.522943	0.12014	0.762219	0.00908583	0.951676	0.501933	0.185487	0.608705	0.295165
Kmarxianus_Y179_1853	3	complement(337431..340565)	KLMA_30153	TEF3	0.743155	0.193121	0.42439	0.136627	0.61519	0.0205697	0.246744	0.604594	-0.272082	0.539488	-0.839369	0.331547
Kmarxianus_Y179_1854	3	complement(341940..343946)	KLMA_30154	GSH1	0.166593	0.66481	-0.304877	0.247833	-0.297765	0.177285	-0.399489	0.316556	-0.100215	0.809052	0.0796367	0.888026
Kmarxianus_Y179_1855	3	344724..346400	KLMA_30155	LSB6	0.0358624	0.868803	0.325202	0.170942	-0.445796	0.0293205	-0.693125	0.0767616	-0.29703	0.371623	-0.0489737	0.956565
Kmarxianus_Y179_1856	3	346798..348951	KLMA_30156	CHS6	0.1535	0.675385	0.205507	0.415401	-0.223875	0.239221	0.356594	0.288968	0.679861	0.0120998	1.33751	0.0218968
Kmarxianus_Y179_1857	3	349639..352968	KLMA_30157	SAP190	0.488737	0.248299	-0.231569	0.329327	0.0753229	0.800279	-0.135738	0.752899	-0.00230872	0.922986	-0.275107	0.693428
Kmarxianus_Y179_1858	3	353510..354163	KLMA_30158	PHS1	0.0344059	0.818364	0.0300712	0.969241	0.0607641	0.865045	0.88869	0.0162805	0.649819	0.0242837	1.91678	0.000885532
Kmarxianus_Y179_1859	3	354527..355015	KLMA_30159	MRPL49	-0.329035	0.286019	0.298616	0.190937	0.16904	0.504318	-0.448043	0.202983	-0.108738	0.817849	0.07848	0.869165
Kmarxianus_Y179_1860	3	355359..359393	KLMA_30160	BCK1	0.721158	0.0739752	0.00979995	0.962885	-0.0666514	0.724989	-0.568226	0.112198	-0.770547	0.0099066	-1.36795	0.0310039
Kmarxianus_Y179_1861	3	complement(359573..361492)	KLMA_30161	TOK1	-0.121153	0.83975	-0.0322661	0.869333	-0.00513848	0.899645	0.459654	0.229799	0.267628	0.318878	-0.0715092	0.94841
Kmarxianus_Y179_1862	3	361944..365159	KLMA_30162	SRS2	0.475618	0.205798	-0.137218	0.512035	0.248338	0.362249	-0.252327	0.53536	-0.192895	0.632318	0.282585	0.554827
Kmarxianus_Y179_1863	3	365514..368426	KLMA_30163	SRS2	0.23504	0.498213	-0.347881	0.178284	0.445777	0.176597	1.33268	0.00446002	1.04362	0.00545797	1.72398	0.00369887
Kmarxianus_Y179_1864	3	complement(368514..369842)	KLMA_30164	GWT1	-0.466755	0.21518	-0.0779385	0.627193	-0.28618	0.154143	-0.0504815	0.834915	-0.263836	0.561106	1.00579	0.113682
Kmarxianus_Y179_1865	3	complement(370156..372240)	KLMA_30165	DPB11	0.679149	0.0441245	-0.0718141	0.701712	0.667705	0.0154489	-0.0896537	0.836117	0.0547271	0.748026	-1.1858	0.0580143
Kmarxianus_Y179_1866	3	373810..376059	KLMA_30166	SIP4	0.183374	0.578695	-0.199685	0.393679	-0.399587	0.0477285	-1.36805	0.0034328	-0.552268	0.165086	-2.70317	0.00541705
Kmarxianus_Y179_1867	3	376668..377588	KLMA_30167	_	-0.0612862	0.990567	-0.172711	0.542726	0.0316732	0.944906	-0.378875	0.538759	0.208426	0.718426	-0.405062	0.594023
Kmarxianus_Y179_1868	3	378207..379229	KLMA_30168	ARG3	0.353855	0.385242	0.595227	0.010014	-0.146719	0.422244	-0.168835	0.655024	-0.0628124	0.912089	-0.118276	0.765859
Kmarxianus_Y179_1869	3	complement(379362..381803)	KLMA_30170	TRL1	0.516172	0.128467	0.0423353	0.866325	0.562824	0.0167952	0.898713	0.0129865	0.460475	0.110222	1.03244	0.0782973
Kmarxianus_Y179_1870	3	382256..384115	KLMA_30171	EXO70	0.0107374	0.893207	0.0061393	0.990282	-0.0607535	0.661915	0.586311	0.103658	0.605392	0.0390081	1.51834	0.00911667
Kmarxianus_Y179_1871	3	complement(384124..386886)	KLMA_30172	ALY2	0.333936	0.387467	-0.0463402	0.825211	-0.169795	0.433468	-0.235947	0.542443	-0.0905232	0.862171	-0.358291	0.644161
Kmarxianus_Y179_1872	3	387174..389525	KLMA_30173	RAD4	0.210843	0.48023	0.077265	0.7833	0.0842099	0.707228	0.153011	0.631426	0.185401	0.500031	-0.174351	0.789502
Kmarxianus_Y179_1873	3	389739..390704	KLMA_30174	SPT2	0.242122	0.49236	0.10643	0.634548	-0.1027	0.708338	0.288304	0.382825	0.0972378	0.695569	0.0543439	0.889017
Kmarxianus_Y179_1874	3	complement(390862..393396)	KLMA_30175	YDR089W	0.802503	0.0347787	0.363476	0.106026	0.335004	0.12843	1.07333	0.00154395	1.07584	0.000219215	1.16079	0.0437904
Kmarxianus_Y179_1875	3	393657..394163	_	_	0.615296	0.25575	0.205401	0.818923	0.221134	0.61769	-0.443526	0.46397	0.138937	0.743981	-1.0781	0.142157
Kmarxianus_Y179_1876	3	394692..395813	KLMA_30176	SLU7	-0.182669	0.750931	-0.854748	0.000197807	0.239562	0.506729	-0.320164	0.446471	-0.303368	0.379725	-0.599558	0.31598
Kmarxianus_Y179_1877	3	396068..397189	KLMA_30177	PUS6	0.599337	0.0861194	-0.340613	0.246564	0.654985	0.0923184	0.349829	0.395597	-0.132662	0.744377	-1.87697	0.00166011
Kmarxianus_Y179_1878	3	complement(397369..400290)	KLMA_30178	BBC1	0.630405	0.172092	0.0405645	0.920923	-0.165054	0.442245	-0.343257	0.402766	-0.419928	0.253917	0.0700077	0.886436
Kmarxianus_Y179_1879	3	400565..401611	KLMA_30179	YGR168C	-0.168599	0.63784	-0.0660488	0.75069	-0.167563	0.504462	0.894574	0.0362433	0.385375	0.305954	1.00304	0.12018
Kmarxianus_Y179_1880	3	complement(401761..402486)	KLMA_30180	CLC1	-0.520844	0.172682	0.00383971	0.965962	-0.0854346	0.667133	0.136914	0.726652	0.102666	0.660928	0.931063	0.0904139
Kmarxianus_Y179_1881	3	complement(402768..404054)	KLMA_30181	TRS65	0.0101798	0.885503	-0.0464572	0.854843	-0.0799928	0.678723	0.922257	0.0303838	1.25725	0.000663227	1.68389	0.00409753
Kmarxianus_Y179_1882	3	complement(404525..406519)	KLMA_30182	SIR2	-0.0134205	0.948747	-0.158531	0.461769	-0.188836	0.319425	0.0377304	0.89306	-0.01401	0.945613	-0.702509	0.308238
Kmarxianus_Y179_1883	3	complement(407067..407648)	KLMA_30183	RTG1	0.100814	0.815397	-0.472538	0.190644	-0.0426316	0.908377	-0.565669	0.380772	-0.060407	0.939211	-0.774141	0.271741
Kmarxianus_Y179_1884	3	408018..409322	KLMA_30184	RPT2	-0.152086	0.760523	-0.120863	0.582	0.0487816	0.856559	0.359097	0.352492	0.259871	0.388259	0.893845	0.177414
Kmarxianus_Y179_1885	3	409925..410830	KLMA_30185	PTC1	-0.0354778	0.920177	-0.1063	0.634366	-0.00483096	0.932992	0.388956	0.26529	-0.223071	0.512069	-0.40745	0.498469
Kmarxianus_Y179_1886	3	complement(411068..411910)	KLMA_30186	MED2	-0.230365	0.508955	0.0953347	0.732462	0.016505	0.986795	-0.766016	0.0298754	-0.146634	0.706601	-0.292646	0.638281
Kmarxianus_Y179_1887	3	412666..413139	KLMA_30187	ATP16	-0.224871	0.6238	0.621918	0.0194762	-0.391825	0.0482909	-0.636618	0.161666	-0.121333	0.836491	-0.855049	0.231833
Kmarxianus_Y179_1888	3	414129..415934	KLMA_30188	MCD1	-0.421896	0.337952	-0.293946	0.172083	0.270174	0.375353	0.00868133	0.94066	0.131021	0.593057	1.39227	0.0185836
Kmarxianus_Y179_1889	3	complement(416047..418260)	KLMA_30189	RQC1	0.452042	0.182559	-0.782447	0.000183836	0.550792	0.0151209	0.812046	0.0191814	0.855017	0.0026988	1.42895	0.0120564
Kmarxianus_Y179_1890	3	418688..419833	KLMA_30190	IPI1	1.37269	0.000967787	-0.556071	0.052962	0.754424	0.0244238	1.28598	0.00256348	0.965847	0.00444284	0.745764	0.210597
Kmarxianus_Y179_1891	3	421698..423458	KLMA_30191	NAM8	0.591985	0.15627	-0.0158959	0.823475	0.397799	0.0591357	0.172576	0.56872	0.0231119	0.901022	-1.2796	0.063723
Kmarxianus_Y179_1892	3	425701..426516	KLMA_30192	PET130	-0.194173	0.562407	0.211381	0.436893	0.477779	0.0910018	0.25286	0.576266	-0.952473	0.00135235	-0.62415	0.309955
Kmarxianus_Y179_1893	3	complement(426920..427192)	_	_	0.137086	0.680206	0.167123	0.408938	-0.515891	0.0198801	-0.357503	0.346911	-0.969205	0.000993174	-1.70677	0.00391386
Kmarxianus_Y179_1894	3	428147..431296	KLMA_30194	PSD2	0.368004	0.327232	-0.307594	0.150413	0.0908231	0.692172	0.137009	0.680516	-1.16373	0.000715649	-1.47912	0.0628757
Kmarxianus_Y179_1895	3	join(431546..431571,431647..433009)	KLMA_30195	POL31	0.0677735	0.8045	0.0621586	0.814905	0.0994041	0.738231	0.719425	0.0828122	0.646067	0.0809431	1.55097	0.0116339
Kmarxianus_Y179_1896	3	complement(433054..434793)	KLMA_30196	MSM1	0.0126878	0.924023	0.245636	0.296743	-0.116053	0.640203	-0.900823	0.0118487	-0.385107	0.262151	-0.855102	0.161148
Kmarxianus_Y179_1897	3	complement(435056..436165)	KLMA_30197	RBG2	-0.361526	0.378082	0.144288	0.55804	0.259522	0.279721	-0.0731996	0.818263	-0.348366	0.282504	-0.157739	0.778003
Kmarxianus_Y179_1898	3	436793..437617	KLMA_30198	YIP1	-0.389767	0.298776	0.148273	0.584769	-0.0562432	0.760779	0.365495	0.263337	0.271504	0.285947	0.601121	0.2947
Kmarxianus_Y179_1899	3	439011..440228	KLMA_30199	RNR2	-0.785813	0.109382	-0.307427	0.246346	0.61533	0.00540081	0.0473694	0.835499	-0.396631	0.22566	0.623369	0.272818
Kmarxianus_Y179_1900	3	440611..>441762	KLMA_30200	OKP1	-0.0946292	0.838356	-0.187905	0.40531	0.130921	0.685632	0.22429	0.696568	0.61541	0.109933	0.94641	0.113407
Kmarxianus_Y179_1901	3	442283..444523	KLMA_30201	PBP1	0.241717	0.481146	-0.0773716	0.705749	-0.0632737	0.737658	-0.436492	0.271535	-0.0720074	0.903364	0.0694344	0.816848
Kmarxianus_Y179_1902	3	444972..446558	KLMA_30202	RRN7	0.14188	0.596918	-0.311282	0.176496	0.388057	0.118456	1.2329	0.00203123	1.2282	0.000313421	1.67695	0.00314738
Kmarxianus_Y179_1903	3	447015..448562	KLMA_30203	ATF1	-0.856397	0.0527651	-1.23288	2.39472e-07	0.0344928	0.935306	-0.209221	0.581421	-0.159857	0.643625	0.834718	0.150824
Kmarxianus_Y179_1904	3	449310..450812	KLMA_30204	ERG1	-0.690213	0.225214	-1.10004	0.000102708	0.786263	0.000459419	1.05355	0.00151574	0.467403	0.0699577	0.518325	0.430541
Kmarxianus_Y179_1905	3	451327..451761	KLMA_30205	CBP4	-0.359994	0.216547	0.4409	0.0490304	-0.342722	0.160194	-0.925621	0.00934758	-0.59707	0.0512298	-2.14553	0.000361035
Kmarxianus_Y179_1906	3	complement(451866..>452405)	KLMA_30206	APS3	-0.511792	0.116037	0.243586	0.269584	-0.104524	0.580366	0.302525	0.465927	-0.144008	0.771254	-0.079769	0.954141
Kmarxianus_Y179_1907	3	453354..453659	KLMA_30207	TIM13	-0.506257	0.0735485	0.567159	0.00989676	-0.119968	0.570456	-0.958589	0.00727807	-0.566532	0.0676999	-2.29635	0.000109339
Kmarxianus_Y179_1908	3	complement(<454350..>454517)	KLMA_30208	QCR9	-0.586522	0.0844167	0.857121	0.000473952	-0.40938	0.0450033	-0.651369	0.151857	-0.437364	0.278348	-1.96698	0.0105064
Kmarxianus_Y179_1909	3	complement(455339..461227)	KLMA_30209	UBR1	0.651651	0.124832	0.269513	0.292731	0.0323439	0.946627	-0.00287243	0.983563	0.0331552	0.85879	-0.21045	0.812379
Kmarxianus_Y179_1910	3	462393..467531	KLMA_30210	UBR2	0.691162	0.0636848	-0.111689	0.553584	0.149942	0.51481	0.106192	0.736799	0.311002	0.219037	0.718356	0.231365
Kmarxianus_Y179_1911	3	complement(467843..469036)	KLMA_30211	TYS1	-0.284062	0.522385	0.212678	0.489764	0.160246	0.539229	0.0957336	0.796811	0.00916718	0.884809	-0.263366	0.659409
Kmarxianus_Y179_1912	3	469742..471778	KLMA_30212	TFG1	0.251667	0.467874	0.0689103	0.788874	-0.0418915	0.845119	-0.213771	0.632158	-0.108537	0.805015	-0.351793	0.639066
Kmarxianus_Y179_1913	3	complement(471937..473091)	KLMA_30214	HGH1	-0.0612547	0.846243	-0.0301137	0.840205	0.781554	0.0150514	1.09992	0.00874337	0.516634	0.124142	0.565291	0.368988
Kmarxianus_Y179_1914	3	473534..473851	KLMA_30216	EMC6	-0.83901	0.0105922	0.0194526	0.975378	-0.121898	0.597461	0.510049	0.214583	0.363279	0.255067	0.906147	0.104458
Kmarxianus_Y179_1915	3	complement(474100..476964)	KLMA_30217	PUF3	0.780681	0.0458519	0.375846	0.0926922	0.126732	0.626483	-0.346502	0.373137	0.319165	0.244529	-0.377883	0.594924
Kmarxianus_Y179_1916	3	478617..480626	KLMA_30218	IZH3	0.724198	0.0421141	-0.3853	0.0636172	0.0937472	0.76722	0.211314	0.535582	0.129625	0.589556	-0.828002	0.151472
Kmarxianus_Y179_1917	3	481196..481939	KLMA_30219	SDO1	-0.262182	0.474318	-0.318546	0.155147	0.392633	0.225441	-0.586442	0.0997047	-0.746473	0.0123293	-1.45646	0.0135658
Kmarxianus_Y179_1918	3	complement(481991..482476)	KLMA_30220	IRC25	-1.02095	0.00706387	-1.01901	1.88257e-06	0.316652	0.280947	-0.233927	0.593194	-0.614887	0.0552418	-1.25707	0.039025
Kmarxianus_Y179_1919	3	482751..484370	KLMA_30221	YEH2	-0.360374	0.456842	-0.726396	0.0023252	0.177559	0.435084	0.152358	0.648683	-0.329971	0.25631	-0.093206	0.917238
Kmarxianus_Y179_1920	3	484814..486247	KLMA_30222	DCAF13	0.188287	0.470847	-0.580154	0.00438388	0.675096	0.0358604	0.697721	0.110477	-0.0497541	0.962025	0.198121	0.836648
Kmarxianus_Y179_1921	3	complement(486678..487964)	KLMA_30223	PSR1	-0.0392171	0.995605	-0.235349	0.281809	-0.00797445	0.902097	0.497537	0.156158	0.514157	0.0766883	0.828274	0.150615
Kmarxianus_Y179_1922	3	488738..490051	KLMA_30224	POM34	-0.111901	0.818309	0.147929	0.566626	0.0139096	0.99817	0.416925	0.221232	0.42234	0.115821	0.973467	0.0994327
Kmarxianus_Y179_1923	3	complement(490292..491314)	KLMA_30225	MEU1	-0.438909	0.287043	-0.0474838	0.770542	-0.110052	0.539689	-0.157788	0.720113	-0.205178	0.546796	-0.339259	0.564228
Kmarxianus_Y179_1924	3	complement(491851..>492009)	KLMA_30226	COX17	-0.575546	0.0990061	0.278022	0.222466	-0.107961	0.527498	-0.882956	0.0369182	-0.342427	0.344061	-2.55053	0.000348061
Kmarxianus_Y179_1925	3	493252..499029	KLMA_30227	CYR1	0.346867	0.358959	-0.460205	0.0293815	0.135451	0.570797	0.31961	0.338261	0.319494	0.236182	1.10295	0.0900634
Kmarxianus_Y179_1926	3	complement(499307..499900)	KLMA_30228	SYS1	-0.641982	0.0471381	-0.0784566	0.679617	-0.433759	0.0933237	0.238334	0.627064	0.561672	0.114264	1.63712	0.00730647
Kmarxianus_Y179_1927	3	500368..502647	KLMA_30229	DRS1	0.516557	0.12297	-0.414618	0.0439383	0.715159	0.0137973	0.247059	0.533555	-0.219584	0.494821	-0.544529	0.271879
Kmarxianus_Y179_1928	3	complement(502759..504738)	KLMA_30230	LMO1	-0.0933494	0.889365	-0.318341	0.120513	-0.0631217	0.764616	-0.294148	0.361201	-0.125049	0.80129	0.811339	0.142674
Kmarxianus_Y179_1929	3	505428..506741	KLMA_30231	MMM1	-0.190527	0.709937	-0.0564731	0.779282	0.233324	0.447223	-0.368469	0.415794	-0.545377	0.202754	-0.0954353	0.987734
Kmarxianus_Y179_1930	3	complement(506738..509527)	KLMA_30232	SPO75	0.137108	0.700266	0.208505	0.486742	0.21374	0.448422	0.931801	0.0271241	1.12428	0.0019534	1.79993	0.00163431
Kmarxianus_Y179_1931	3	complement(510003..512240)	KLMA_30233	PMT2	-0.181796	0.742912	-0.278785	0.266834	0.682797	0.00405111	0.606824	0.122513	0.408354	0.184207	1.04928	0.120244
Kmarxianus_Y179_1932	3	complement(512621..513910)	KLMA_30234	FUN26	-0.154261	0.76574	0.227705	0.361315	-0.109502	0.612708	-0.195674	0.597513	0.0545379	0.79544	-0.294285	0.608122
Kmarxianus_Y179_1933	3	complement(514512..516962)	KLMA_30235	CCR4	0.292205	0.427044	-0.209592	0.374328	0.152566	0.513583	0.469745	0.175054	0.778147	0.00795625	1.48577	0.0225692
Kmarxianus_Y179_1934	3	complement(518297..519412)	KLMA_30236	ATS1	0.221741	0.536467	0.909774	0.00143431	0.00461538	0.938702	0.420859	0.308875	-0.238353	0.48975	-0.510165	0.402903
Kmarxianus_Y179_1935	3	521907..523340	KLMA_30237	MTH1	0.571701	0.126397	-0.352293	0.0903816	0.0280602	0.878062	-0.0579457	0.951422	-0.602628	0.0944753	-1.40933	0.0743446
Kmarxianus_Y179_1936	3	524196..525620	KLMA_30238	DBP5	0.0862564	0.725117	-0.158313	0.471857	0.143683	0.54126	0.451618	0.170073	0.463993	0.0846377	1.09226	0.063452
Kmarxianus_Y179_1937	3	join(526186..526219,526395..526528)	KLMA_30239	PMP3	-0.631685	0.110515	-0.370936	0.147456	-0.307121	0.192	-0.55928	0.197486	-0.522523	0.163758	-1.04479	0.132595
Kmarxianus_Y179_1938	3	complement(527271..527444)	KLMA_30240	TOM6	-0.497093	0.142395	0.467593	0.0478454	0.0448557	0.938627	-0.328273	0.373553	-0.411492	0.200328	-1.76994	0.00375314
Kmarxianus_Y179_1939	3	complement(528069..528299)	_	IRC23	-0.564564	0.146384	-0.191303	0.37926	0.026444	0.982237	-0.0834547	0.82545	-0.306069	0.370928	-0.573308	0.323899
Kmarxianus_Y179_1940	3	complement(529243..530679)	KLMA_30241	WHI2	0.256922	0.458949	-0.0894239	0.651022	0.202948	0.368461	0.349101	0.298961	0.121914	0.677722	-0.467097	0.556513
Kmarxianus_Y179_1941	3	complement(531947..533158)	KLMA_30242	CUE5	0.0112029	0.881621	0.0227496	0.989509	-0.39187	0.0619599	-0.406068	0.289178	-0.539596	0.0953313	-0.367198	0.581104
Kmarxianus_Y179_1942	3	complement(533999..534868)	KLMA_30243	GLO4	-0.531953	0.175187	-0.282112	0.184219	-0.397339	0.0555946	-0.466951	0.265414	-0.472867	0.192661	-1.24675	0.070012
Kmarxianus_Y179_1943	3	complement(535208..537799)	KLMA_30244	_	0.239384	0.49199	-0.268711	0.1926	-0.384188	0.0728178	0.102883	0.814877	0.199201	0.406602	0.613203	0.282412
Kmarxianus_Y179_1944	3	538400..539560	KLMA_30245	YKL162C	-0.692265	0.0852295	-0.892846	0.000874665	-0.836913	0.000300638	-0.773908	0.0274895	-0.15744	0.66041	-0.705683	0.252791
Kmarxianus_Y179_1945	3	complement(540073..541356)	KLMA_30246	RSB1	-0.342267	0.451669	-0.911417	1.33662e-05	0.316228	0.161755	0.53006	0.144281	-1.51218	2.7577e-05	-1.874	0.0192631
Kmarxianus_Y179_1946	3	544031..546316	KLMA_30247	GPT2	0.0309374	0.871742	-0.283592	0.214103	0.475825	0.0476905	0.555374	0.188924	-0.164503	0.674028	-0.0745365	0.947582
Kmarxianus_Y179_1947	3	complement(546589..547215)	KLMA_30248	BET3	-0.375115	0.25209	0.0825391	0.759364	0.195578	0.502896	0.931229	0.0192204	0.682905	0.0490543	1.06914	0.0849962
Kmarxianus_Y179_1948	3	complement(547591..548856)	KLMA_30249	ETT1	-0.447616	0.364159	-0.958538	0.000541671	0.66384	0.00181205	-0.331739	0.347001	-0.565782	0.0649764	-0.686444	0.223696
Kmarxianus_Y179_1949	3	549439..551286	KLMA_30250	MET1	-0.0211545	0.923702	-1.37094	1.0875e-09	-0.000911983	1	0.294566	0.522615	0.522846	0.158557	0.665192	0.28644
Kmarxianus_Y179_1950	3	551656..552714	KLMA_30251	YKR070W	-0.0716284	0.898941	0.65293	0.00291051	-0.353418	0.0733599	0.758511	0.0256469	1.06583	0.000311313	1.43659	0.0103464
Kmarxianus_Y179_1951	3	complement(553087..553422)	KLMA_30252	TMC1	-0.348359	0.377058	-0.250066	0.250733	-0.40536	0.0848901	-0.537194	0.218727	-0.383472	0.310348	-1.30957	0.0658289
Kmarxianus_Y179_1952	3	complement(554001..555026)	KLMA_30253	DRE2	0.0411012	0.87087	0.268922	0.296914	-0.181505	0.401242	-0.177187	0.702936	0.00862959	0.954361	-0.397637	0.59778
Kmarxianus_Y179_1953	3	complement(555484..557589)	KLMA_30254	VHS3	0.124747	0.73795	-0.0784175	0.646614	0.107928	0.645293	0.00544118	0.935316	0.417751	0.161267	-0.501141	0.496904
Kmarxianus_Y179_1954	3	complement(558350..559720)	KLMA_30255	NOB1	0.329235	0.235766	-0.277611	0.156031	0.668052	0.0262993	0.141419	0.653374	-0.348062	0.257679	-1.99844	0.00102372
Kmarxianus_Y179_1955	3	560382..561533	KLMA_30257	SGT1	-0.155923	0.72203	-0.258707	0.224319	0.554615	0.00645529	0.868182	0.0128105	1.35418	2.45103e-05	0.15936	0.779688
Kmarxianus_Y179_1956	3	complement(<561693..564217)	KLMA_30258	ASE1	0.0107116	0.844901	-0.790367	0.000242328	0.160309	0.615667	0.550572	0.195364	1.07988	0.00139807	1.50075	0.00761946
Kmarxianus_Y179_1957	3	join(565321..565487,565670..565688)	KLMA_30259	AIM29	-0.659599	0.0549582	0.0318002	0.97001	-0.0445834	0.806056	0.133965	0.6778	-0.0413194	0.997143	-0.73586	0.222099
Kmarxianus_Y179_1958	3	complement(565873..567291)	KLMA_30260	LPL1	-0.205105	0.621772	-0.206016	0.327434	-0.161367	0.42217	-0.0353711	0.9391	-0.0470016	0.960257	0.677505	0.231345
Kmarxianus_Y179_1959	3	complement(567635..568441)	KLMA_30261	SLD7	-0.545992	0.125198	-0.0737843	0.662554	0.0189854	0.948323	0.0692632	0.835847	0.140801	0.576414	0.0613881	0.856394
Kmarxianus_Y179_1960	3	568841..569863	KLMA_30262	CKA2	-0.407111	0.308881	-0.0681767	0.677018	-0.0366909	0.789823	0.324099	0.325585	0.169242	0.482773	0.316874	0.58302
Kmarxianus_Y179_1961	3	complement(570404..571186)	KLMA_30263	YKR075C	-0.135628	0.771747	-1.07617	0.000261135	-0.200276	0.294655	-0.275615	0.566391	-0.140608	0.781145	-1.90555	0.0285382
Kmarxianus_Y179_1962	3	573391..574554	KLMA_30264	RPL3	-0.115194	0.873042	0.469591	0.0909465	0.822202	0.000916312	-0.0227607	0.975414	-0.804412	0.0496585	-1.66504	0.071241
Kmarxianus_Y179_1963	3	complement(574793..575479)	KLMA_30266	YNG1	-0.0573461	0.885083	0.369228	0.202117	0.370379	0.274181	0.103198	0.746741	0.541306	0.0717793	-0.28351	0.641204
Kmarxianus_Y179_1964	3	join(576451..576850,576932..577329)	KLMA_30267	CYT1	0.344616	0.362815	1.06812	5.16406e-05	-0.285003	0.196912	-0.798906	0.101575	0.0203745	0.864038	-1.33451	0.107668
Kmarxianus_Y179_1965	3	578965..580560	KLMA_30268	MSA1	-0.099665	0.869253	-0.334906	0.11802	-0.0609601	0.667885	0.0307275	0.939932	0.212412	0.436505	1.02349	0.0600318
Kmarxianus_Y179_1966	3	complement(580844..582529)	KLMA_30269	ALG8	-0.231816	0.629621	0.0267526	1	0.028885	0.999839	1.02395	0.00315242	0.647486	0.0248887	0.99432	0.0827944
Kmarxianus_Y179_1967	3	582712..584715	KLMA_30270	VPS5	-0.0720344	0.928316	0.0306635	0.938384	-0.478706	0.0225557	-0.593457	0.0863898	-0.287384	0.408752	-0.0540076	0.989477
Kmarxianus_Y179_1968	3	complement(584771..587221)	KLMA_30271	TRZ1	0.402795	0.222365	-0.335141	0.100162	0.344092	0.143183	0.204855	0.538585	0.516296	0.0634495	0.39447	0.518369
Kmarxianus_Y179_1969	3	588878..592417	KLMA_50423	TY2B-LR1	0.154609	0.979956	-0.248466	0.663471	-0.93785	0.450078	0.171229	0.851456	1.06074	0.188228	0.876524	0.308939
Kmarxianus_Y179_1970	3	593968..595605	KLMA_30272	_	-0.0127272	0.941107	0.0260616	0.981621	0.55343	0.0156378	0.703357	0.108239	1.23129	0.000503162	1.66545	0.0327539
Kmarxianus_Y179_1971	3	complement(595770..596189)	KLMA_30273	TCA17	-0.529697	0.149981	0.0864434	0.822412	0.227776	0.566309	1.14919	0.0167198	1.64423	2.06087e-06	1.13753	0.0584171
Kmarxianus_Y179_1972	3	complement(596503..597966)	KLMA_30274	FRD1	-0.660285	0.183196	-0.446905	0.114382	0.587481	0.0147849	-0.438023	0.34359	0.156138	0.578715	0.445808	0.496574
Kmarxianus_Y179_1973	3	complement(599296..600471)	KLMA_30275	GLY1	0.386159	0.313218	-0.0645408	0.755099	0.474697	0.0658883	0.298529	0.484172	0.277189	0.412632	-0.0766056	0.850645
Kmarxianus_Y179_1974	3	complement(<601733..>603499)	KLMA_30276	SIT1	0.229631	0.449058	0.28406	0.213104	0.287074	0.270776	-0.237469	0.473965	-0.613092	0.0417688	-0.911351	0.120103
Kmarxianus_Y179_1975	3	604284..604712	KLMA_30278	IES6	-0.594783	0.0945018	-0.00240342	0.902753	0.216574	0.399026	-0.0562285	0.917914	-0.194214	0.599628	-1.12857	0.0655102
Kmarxianus_Y179_1976	3	605104..607467	KLMA_30279	YEL043W	0.666402	0.113778	-0.0933288	0.657587	0.206827	0.335284	0.385033	0.233228	0.374392	0.173221	0.370407	0.484463
Kmarxianus_Y179_1977	3	complement(607588..608304)	KLMA_30280	ISY1	0.177268	0.576753	-0.117346	0.594499	-0.0552077	0.818003	-0.360013	0.286956	-0.872668	0.00293154	-1.58036	0.00906857
Kmarxianus_Y179_1978	3	608676..610256	KLMA_30281	GDA1	-0.0160402	0.91857	0.131659	0.628591	0.0845236	0.794194	1.92309	4.33221e-08	0.0405321	0.945342	0.102817	0.784363
Kmarxianus_Y179_1979	3	610680..612224	KLMA_30282	UTR1	-0.38684	0.329708	-0.121401	0.521629	-0.407155	0.0398439	0.0896775	0.752508	0.241248	0.38056	-0.0230105	0.989955
Kmarxianus_Y179_1980	3	613131..614543	KLMA_30283	UTR2	-0.015262	0.919966	0.132482	0.715053	0.612987	0.006986	1.0134	0.00792289	1.39642	3.07595e-06	1.74349	0.00480631
Kmarxianus_Y179_1981	3	complement(615192..615524)	KLMA_30284	CYCK	-0.438758	0.28949	1.00113	0.000124884	-0.230063	0.279578	-0.769736	0.122472	-0.319373	0.45817	-2.74517	0.004434
Kmarxianus_Y179_1982	3	616781..617638	KLMA_30285	TMT1	0.335178	0.67445	0.404711	0.298382	0.128716	0.840662	-0.251864	0.709971	0.0516799	0.865295	-1.106	0.103058
Kmarxianus_Y179_1983	3	618680..619426	KLMA_30286	GRX3	0.00584134	0.937612	0.16006	0.527509	-0.243067	0.300148	0.520007	0.167086	-0.934286	0.00532347	-0.785207	0.248171
Kmarxianus_Y179_1984	3	complement(619822..621816)	KLMA_30288	RAD24	0.350347	0.292173	0.319167	0.185099	-0.103909	0.617239	0.633299	0.109459	0.69749	0.0304243	1.18612	0.040543
Kmarxianus_Y179_1985	3	622146..628577	KLMA_30289	BRR2	0.560876	0.13174	-0.0570043	0.755729	0.263443	0.233336	0.413242	0.186216	0.396705	0.141598	0.150757	0.828593
Kmarxianus_Y179_1986	3	complement(628664..631000)	KLMA_30290	RAD3	0.167625	0.602758	0.128419	0.586812	0.0879168	0.720426	0.154705	0.634687	0.34501	0.173792	1.08036	0.0614654
Kmarxianus_Y179_1987	3	complement(631322..632005)	KLMA_30292	ADK2	-0.486064	0.163745	0.24768	0.270838	-0.117075	0.573938	-1.24976	0.000639276	-0.296386	0.376218	-0.604242	0.312935
Kmarxianus_Y179_1988	3	632575..636156	KLMA_30293	MSH6	-0.0646572	0.940364	-0.230916	0.232067	-0.252347	0.230922	-0.405202	0.223765	-0.449414	0.158862	0.0750145	0.855956
Kmarxianus_Y179_1989	3	complement(636499..639006)	KLMA_30294	RPH1	0.669043	0.0819358	-0.538554	0.0104329	-0.413681	0.0426508	-0.415835	0.2418	-0.179673	0.619557	-0.709046	0.31076
Kmarxianus_Y179_1990	3	640124..641599	KLMA_30295	CCA1	0.0666148	0.777895	0.0588459	0.820069	0.192371	0.422473	1.35606	0.000156488	0.855047	0.00475047	1.10299	0.0551853
Kmarxianus_Y179_1991	3	complement(642186..644567)	KLMA_30296	BCK2	0.42184	0.293055	-0.321974	0.12709	-0.0807296	0.698209	-0.515777	0.158394	-0.0688646	0.920763	-0.22533	0.833267
Kmarxianus_Y179_1992	3	complement(645652..650409)	KLMA_30297	DNF1	0.635442	0.177255	-0.0722401	0.70438	0.107511	0.693892	-0.124798	0.756293	-0.176121	0.644335	-0.0898636	0.908867
Kmarxianus_Y179_1993	3	complement(651292..651774)	KLMA_30298	UBC13	0.409326	0.351477	-0.33565	0.107407	-0.110604	0.597792	-0.66817	0.07199	-0.594308	0.0583177	0.0591695	0.847171
Kmarxianus_Y179_1994	3	complement(652565..654337)	KLMA_30299	PAB1	0.44504	0.265657	0.188669	0.513072	0.533808	0.01732	0.240569	0.498935	-0.0625822	0.887934	0.270204	0.68506
Kmarxianus_Y179_1995	3	complement(655324..660021)	KLMA_30300	CHD1	0.546654	0.214401	-0.212811	0.331897	0.358115	0.103016	-0.0215618	1	0.16246	0.520014	0.204325	0.737355
Kmarxianus_Y179_1996	3	661413..663236	KLMA_30301	RLI1	-0.119759	0.886632	-0.417748	0.084902	1.08867	1.42759e-06	0.658715	0.0507548	0.105556	0.606545	0.888436	0.139622
Kmarxianus_Y179_1997	3	complement(663662..666676)	KLMA_30302	GPI13	0.31747	0.336874	-0.0175554	0.831275	0.166271	0.483057	0.584781	0.0818872	0.699239	0.0137439	1.09669	0.0569022
[truncated: 3,214 more rows]
